# Supplementary material for: Phosphine-catalysed intermolecular cyclopropanation reaction between benzyl bromides and activated alkenes
Source: Royal Society of Chemistry journal article supplement (doi:10.1039/d2nj03417d), 2022-01-01

# Phosphine-catalysed intermolecular cyclopropanation reaction between benzyl bromides and activated alkenes

Jie Zhang,<sup>a</sup> Xue Song,<sup>a</sup> Zhi-Chao Chen,<sup>\*a</sup> Wei Du,<sup>a</sup> Ying-Chun Chen<sup>\*a,b</sup>

<sup>a</sup>Key Laboratory of Drug-Targeting and Drug Delivery System of the Education Ministry and Sichuan Province, and Sichuan Research Center for Drug Precision Industrial Technology, West China School of Pharmacy, Sichuan University, Chengdu 610041, China

<sup>b</sup>College of Pharmacy, Third Military Medical University, Shapingba, Chongqing 400038, China

Email: chenzhichao@scu.edu.cn; ycchen@scu.edu.cn

## Supplementary Information

|                                                                               |            |
|-------------------------------------------------------------------------------|------------|
| <b>1. General methods and materials .....</b>                                 | <b>S1</b>  |
| <b>2. Preparation and characterization of phosphine catalysts .....</b>       | <b>S2</b>  |
| <b>3. Phosphine-catalysed intermolecular cyclopropanation reactions .....</b> | <b>S4</b>  |
| <b>3.1 General procedure for synthesis of 3 .....</b>                         | <b>S4</b>  |
| <b>3.2 Procedure for synthesis of 5 .....</b>                                 | <b>S18</b> |
| <b>3.3 Procedure for synthesis of 7 .....</b>                                 | <b>S18</b> |
| <b>4. Asymmetric intermolecular cyclopropanation exploration .....</b>        | <b>S19</b> |
| <b>5. Transformations of product 3a .....</b>                                 | <b>S20</b> |
| <b>6. More substrate exploration .....</b>                                    | <b>S21</b> |
| <b>7. Crystal data and structural refinement .....</b>                        | <b>S22</b> |
| <b>8. NMR, HRMS spectra and HPLC chromatograms .....</b>                      | <b>S24</b> |

## 1. General methods and materials

<sup>1</sup>H NMR (400 MHz), <sup>13</sup>C NMR (100 or 151 MHz), <sup>19</sup>F NMR (376 MHz) and <sup>31</sup>P NMR (162 MHz) spectra were recorded on Varian INOVA-400/54, Agilent DD2-600/54 or Bruker Ascend™ 400 instruments (Chemical shifts were reported in ppm from tetramethylsilane with the solvent resonance as the internal standard in CDCl<sub>3</sub> solution, unless otherwise noted). The following abbreviations were used to explain the multiplicities: s = singlet, d = doublet, t = triplet, q = quartet, dd = double doublet, td = triple doublet; m = multiplet, and coupling constants (*J*) are reported in Hertz (Hz). High resolution mass spectra (HRMS) were recorded on a Waters SYNAPT G2, Agilent G1969-85000 or Shimadzu LCMS-IT-TOF using a time-of-flight mass spectrometer equipped with electrospray ionization (ESI) source. X-ray diffraction experiments were carried out on an Agilent Gemini and the data obtained were deposited at the Cambridge Crystallographic Data Centre (CCDC 2178229). Enantiomeric excess was determined by HPLC (Agilent Technologies: 1220 Infinity II, 1200 Series, 1260 Infinity) analysis on a chiral column in comparison with an authentic racemate, using a Daicel Chiralpak IA Column (250 × 4.6 mm). UV detection was monitored at 254 nm. The melting point was obtained from WRX-4 Mel-Temp apparatus. Column chromatography was performed on silica gel (300–400 mesh) eluting with ethyl acetate (EtOAc)/petroleum ether. TLC was performed on glass-backed silica plates. UV light, I<sub>2</sub>, and solution of potassium permanganate were used to visualize products or starting materials. All chemicals were used without purification as commercially available unless otherwise noted. Petroleum ether and EtOAc were distilled. Toluene was freshly distilled from CaH<sub>2</sub> under an atmosphere of dry argon. Dried solvents and liquid reagents were transferred by oven-dried syringe. All benzyl bromides used were commercially available. The α-cyano-α,β-unsaturated ketones **2**,<sup>1</sup> 2-benzylidene-1*H*-indene-1,3(2*H*)-dione **4**,<sup>2</sup> and *tert*-butyl (*Z*)-2-oxo-3-(2-oxo-2-phenylethylidene)-indoline-1-carboxylate **6**<sup>3</sup> were prepared according to the literature procedures, and the spectroscopic data were consistent with the literature report.

- 1 (a) A. P. Dieskau, M. S. Holzwarth and B. Plietker, Fe-Catalysed Allylic C–C-Bond Activation: Vinylcyclopropanes as Versatile α,α,β,γ-Synthons in Traceless Allylic Substitutions and [3 + 2]-Cycloadditions, *J. Am. Chem. Soc.*, 2012, **134**, 5048–5051; (b) R. Maity and S. C. Pan, Dienamine-Mediated Asymmetric Inverse-Electron-Demand Hetero-Diels–Alder Reaction of

Linear Deconjugated Enones: Diversity-Oriented Synthesis of 3,4-Dihydropyrans, *Eur. J. Org. Chem.*, 2017, **4**, 871–874.

- G. He, C. Wu, J. Zhou, Q. Yang, C. Zhang, Y. Zhou, H. Zhang and H. Liu, A Method for Synthesis of 3-Hydroxy-1-indanones via Cu-Catalyzed Intramolecular Annulation Reactions, *J. Org. Chem.*, 2018, **83**, 13356–13362.
- L.-L. Zhang, J.-W. Zhang, S.-H. Xiang, Z. Guo and B. Tan, Remote Control of Axial Chirality: Synthesis of Spirooxindole–Urazoles via Desymmetrization of ATAD, *Org. Lett.*, 2018, **20**, 6022–6026.

## 2. Preparation and characterization of phosphine catalysts

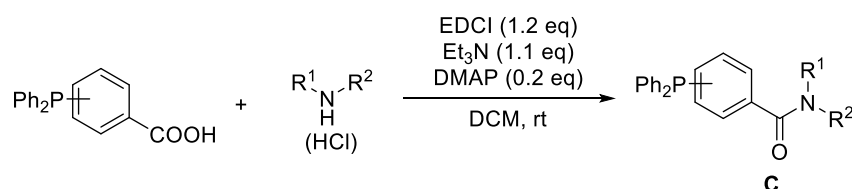

To a solution of carboxylic acid (1.0 equiv), amine or amine hydrochloride (1.0 equiv), triethylamine (1.1 equiv) and DMAP (0.2 equiv) in DCM was added EDCI (1.2 equiv). The resultant mixture was stirred at rt overnight. After completion, the solvent was evaporated, and the residue was purified by flash chromatography on silica gel (EtOAc/petroleum ether) to give the phosphine catalyst **C**.

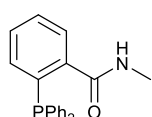

**C2**: White solid; <sup>1</sup>H NMR (400 MHz, CDCl<sub>3</sub>): δ (ppm) 7.63–7.56 (m, 1H), 7.41–7.27 (m, 12H), 7.00–6.92 (m, 1H), 5.92 (s, 1H), 2.80 (d, *J* = 4.8 Hz 3H); <sup>13</sup>C NMR (100 MHz, CDCl<sub>3</sub>): δ (ppm) 169.6, 141.4 (d, <sup>2</sup>*J*<sub>PC</sub> = 25.3 Hz), 136.8 (d, <sup>3</sup>*J*<sub>PC</sub> = 10.2 Hz), 136.0 (d, <sup>2</sup>*J*<sub>PC</sub> = 19.9 Hz), 134.0, 133.9 (d, <sup>2</sup>*J*<sub>PC</sub> = 20.1 Hz), 130.1, 129.0, 128.8, 128.7 (d, <sup>3</sup>*J*<sub>PC</sub> = 7.1 Hz), 127.9 (d, <sup>4</sup>*J*<sub>PC</sub> = 4.9 Hz), 26.6; <sup>31</sup>P NMR (162 MHz, CDCl<sub>3</sub>): δ (ppm) –9.7; HRMS (ESI-TOF) *m/z*: [M + H]<sup>+</sup> Calcd for C<sub>20</sub>H<sub>19</sub>NOP<sup>+</sup> 320.1199; Found 320.1200.

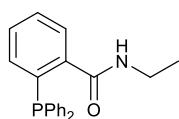

**C3**: Colorless oil; <sup>1</sup>H NMR (400 MHz, CDCl<sub>3</sub>): δ (ppm) 7.63–7.57 (m, 1H), 7.40–7.26 (m, 12H), 6.98–6.90 (m, 1H), 5.83 (s, 1H), 3.32–3.26 (m, 3H), 1.00 (t, *J* = 7.2 Hz 3H); <sup>13</sup>C NMR (100 MHz, CDCl<sub>3</sub>): δ (ppm) 168.9, 141.7 (d, <sup>2</sup>*J*<sub>PC</sub> = 25.6 Hz),

136.9 (d,  $^1J_{PC} = 10.7$  Hz), 135.6 (d,  $^2J_{PC} = 20.0$  Hz), 134.0, 133.9 (d,  $^2J_{PC} = 20.1$  Hz), 130.1, 128.9, 128.8, 128.7 (d,  $^3J_{PC} = 7.1$  Hz), 128.0 (d,  $^4J_{PC} = 4.9$  Hz), 34.8, 14.4;  $^{31}\text{P}$  NMR (162 MHz,  $\text{CDCl}_3$ ):  $\delta$  (ppm)  $-10.2$ ; HRMS (ESI-TOF)  $m/z$ :  $[\text{M} + \text{H}]^+$  Calcd for  $\text{C}_{21}\text{H}_{21}\text{NOP}^+$  334.1355; Found 334.1366.

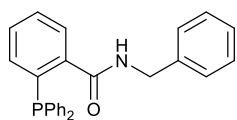

**C4:** Colorless oil;  $^1\text{H}$  NMR (400 MHz,  $\text{CDCl}_3$ ):  $\delta$  (ppm) 7.65–7.60 (m, 1H), 7.40–7.23 (m, 15H), 7.22–7.16 (m, 2H), 7.00–6.94 (m, 1H), 6.17 (s, 1H), 4.46 (d,  $J = 5.6$  Hz, 2H);  $^{13}\text{C}$  NMR (100 MHz,  $\text{CDCl}_3$ ):  $\delta$  (ppm) 168.8, 141.3 (d,

$^2J_{PC} = 25.9$  Hz), 137.7, 136.8 (d,  $^2J_{PC} = 10.7$  Hz), 136.0 (d,  $^2J_{PC} = 20.7$  Hz), 134.1, 133.9 (d,  $^2J_{PC} = 20.2$  Hz), 130.3, 128.9, 128.8, 128.7 (d,  $^3J_{PC} = 2.7$  Hz), 128.6, 128.1, 128.0 (d,  $^3J_{PC} = 5.0$  Hz), 127.5, 44.2;  $^{31}\text{P}$  NMR (162 MHz,  $\text{CDCl}_3$ ):  $\delta$  (ppm)  $-10.2$ ; HRMS (ESI-TOF)  $m/z$ :  $[\text{M} + \text{H}]^+$  Calcd for  $\text{C}_{26}\text{H}_{23}\text{NOP}^+$  396.1512; Found 396.1513.

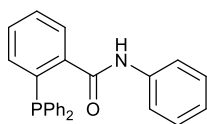

**C5:** White solid;  $^1\text{H}$  NMR (400 MHz,  $\text{CDCl}_3$ ):  $\delta$  (ppm) 7.75–7.70 (m, 1H), 7.60 (s, 1H), 7.47–7.40 (m, 1H), 7.40–7.21 (m, 15H), 7.11–7.05 (m, 1H), 7.04–6.99 (m, 1H);  $^{13}\text{C}$  NMR (100 MHz,  $\text{CDCl}_3$ ):  $\delta$  (ppm) 167.1, 141.8 (d,  $^2J_{PC} = 26.2$  Hz),

137.5, 136.3 (d,  $^1J_{PC} = 10.2$  Hz), 135.7 (d,  $^2J_{PC} = 20.0$  Hz), 134.1, 134.0 (d,  $^2J_{PC} = 20.1$  Hz), 130.5, 129.2, 129.1, 128.9, 128.8 (d,  $^3J_{PC} = 7.3$  Hz), 128.5 (d,  $^4J_{PC} = 4.8$  Hz), 124.4, 119.9;  $^{31}\text{P}$  NMR (162 MHz,  $\text{CDCl}_3$ ):  $\delta$  (ppm)  $-10.4$ ; HRMS (ESI-TOF)  $m/z$ :  $[\text{M} + \text{H}]^+$  Calcd for  $\text{C}_{25}\text{H}_{21}\text{NOP}^+$  382.1355; Found 382.1362.

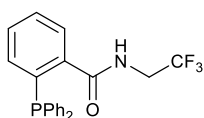

**C6:** White solid;  $^1\text{H}$  NMR (400 MHz,  $\text{CD}_3\text{OD}$ ):  $\delta$  (ppm) 7.56–7.51 (m, 1H), 7.46–7.39 (m, 1H), 7.38–7.20 (m, 11H), 7.03–6.97 (m, 1H), 3.84 (q,  $J = 9.4$  Hz 2H);  $^{13}\text{C}$  NMR (100 MHz,  $\text{CD}_3\text{OD}$ ):  $\delta$  (ppm) 170.8, 140.4 (d,  $^2J_{PC} = 24.9$  Hz),

137.3 (d,  $^3J_{PC} = 11.1$  Hz), 137.1 (d,  $^2J_{PC} = 21.7$  Hz), 133.9, 133.6 (d,  $^2J_{PC} = 20.6$  Hz), 130.0, 128.5, 1228.4, 128.1 (d,  $^3J_{PC} = 7.1$  Hz), 127.1 (d,  $^3J_{PC} = 4.8$  Hz), 124.0 (q,  $^1J_{FC} = 278.3$  Hz), 40.1 (q,  $^2J_{FC} = 34.7$  Hz);  $^{19}\text{F}$  NMR (376 MHz,  $\text{CD}_3\text{OD}$ ):  $\delta$  (ppm)  $-73.5$  (m);  $^{31}\text{P}$  NMR (162 MHz,  $\text{CD}_3\text{OD}$ ):  $\delta$  (ppm)  $-9.6$ ; HRMS (ESI-TOF)  $m/z$ :  $[\text{M} + \text{H}]^+$  Calcd for  $\text{C}_{21}\text{H}_{18}\text{NF}_3\text{OP}^+$  388.1073; Found 388.1070.

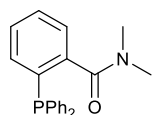

**C7:** Colorless oil;  $^1\text{H}$  NMR (400 MHz,  $\text{CDCl}_3$ ):  $\delta$  (ppm) 7.39–7.26 (m, 13H), 7.16–7.11 (m, 1H), 3.01 (s, 3H), 2.63 (s, 3H);  $^{13}\text{C}$  NMR (100 MHz,  $\text{CDCl}_3$ ):  $\delta$  (ppm)

170.9 (d,  $^3J_{PC} = 3.3$  Hz), 143.2 (d,  $^2J_{PC} = 32.9$  Hz), 136.5 (d,  $^1J_{PC} = 10.8$  Hz), 134.8 (d,  $^2J_{PC} = 16.3$  Hz), 134.2, 133.8 (d,  $^2J_{PC} = 19.9$  Hz), 129.1, 128.8, 128.7, 128.5 (d,  $^3J_{PC} = 7.0$  Hz), 126.3 (d,  $^3J_{PC} =$



7.4 Hz), 38.8 (d,  $^5J_{\text{PC}} = 2.9$  Hz), 34.6;  $^{31}\text{P}$  NMR (162 MHz,  $\text{CDCl}_3$ ):  $\delta$  (ppm)  $-12.3$ ; HRMS (ESI-TOF)  $m/z$ :  $[\text{M} + \text{Na}]^+$  Calcd for  $\text{C}_{21}\text{H}_{20}\text{NOPNa}^+$  356.1175; Found 356.1176.

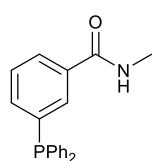

**C8:** White solid;  $^1\text{H}$  NMR (400 MHz,  $\text{CDCl}_3$ ):  $\delta$  (ppm) 7.76 (dd,  $J = 7.2, 2.0$  Hz 1H), 7.70 (dd,  $J = 8.0, 1.6$  Hz 1H), 7.43–7.26 (m, 12H), 6.10 (s, 1H), 2.95 (d,  $J = 4.8$  Hz 3H);  $^{13}\text{C}$  NMR (100 MHz,  $\text{CDCl}_3$ ):  $\delta$  (ppm) 167.9, 138.3 (d,  $^1J_{\text{PC}} = 13.0$  Hz), 136.5 (d,  $^3J_{\text{PC}} = 10.5$  Hz), 136.3 (d,  $^2J_{\text{PC}} = 15.7$  Hz), 134.9 (d,  $^3J_{\text{PC}} = 7.2$  Hz), 133.8 (d,  $^2J_{\text{PC}} = 19.7$  Hz), 131.7 (d,  $^2J_{\text{PC}} = 23.6$  Hz), 129.0, 128.9 (d,  $^4J_{\text{PC}} = 5.6$  Hz), 128.7 (d,  $^3J_{\text{PC}} = 6.9$  Hz), 127.6, 26.9;  $^{31}\text{P}$  NMR (162 MHz,  $\text{CDCl}_3$ ):  $\delta$  (ppm)  $-5.3$  (m); HRMS (ESI-TOF)  $m/z$ :  $[\text{M} + \text{Na}]^+$  Calcd for  $\text{C}_{20}\text{H}_{18}\text{NOPNa}^+$  342.1018; Found 342.1016.

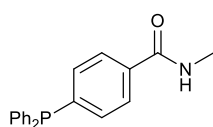

**C9:** White solid;  $^1\text{H}$  NMR (400 MHz,  $\text{CDCl}_3$ ):  $\delta$  (ppm) 7.76–7.64 (m, 2H), 7.41–7.26 (m, 12H), 6.29 (s, 1H), 2.98 (d,  $J = 4.8$  Hz 3H);  $^{13}\text{C}$  NMR (100 MHz,  $\text{CDCl}_3$ ):  $\delta$  (ppm) 168.0, 141.9 (d,  $^1J_{\text{PC}} = 13.3$  Hz), 136.4 (d,  $^1J_{\text{PC}} = 10.5$  Hz), 134.6, 133.9 (d,  $^2J_{\text{PC}} = 19.7$  Hz), 133.5 (d,  $^2J_{\text{PC}} = 18.8$  Hz), 129.1, 128.7 (d,  $^3J_{\text{PC}} = 7.1$  Hz), 126.8 (d,  $^4J_{\text{PC}} = 6.4$  Hz), 26.9;  $^{31}\text{P}$  NMR (162 MHz,  $\text{CDCl}_3$ ):  $\delta$  (ppm)  $-5.6$  (m); HRMS (ESI-TOF)  $m/z$ :  $[\text{M} + \text{Na}]^+$  Calcd for  $\text{C}_{20}\text{H}_{18}\text{NOPNa}^+$  342.1018; Found 342.1014.

### 3. Phosphine-catalysed intermolecular cyclopropanation reactions

#### 3.1 General procedure for synthesis of 3

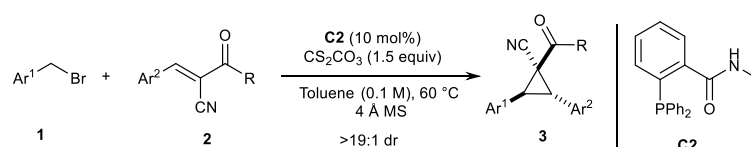

A mixture of benzyl bromide **1** (0.12 mmol, 1.2 equiv),  $\alpha$ -cyano- $\alpha,\beta$ -unsaturated ketone **2** (0.10 mmol, 1.0 equiv), cesium carbonate (0.15 mmol, 1.5 equiv), **C2** (3.2 mg, 10 mol%) and 4 Å MS (40.0 mg) in distilled toluene (1.0 mL) was stirred at 60 °C, and the reaction was monitored by TLC. After completion, the mixture was directly purified by flash chromatography on silica gel to give the product (EtOAc/petroleum ether).

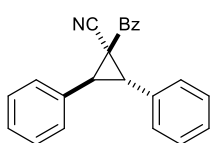

**Synthesis of 3a:** A mixture of benzyl bromide **1a** (20.4 mg, 0.119 mmol, 1.2 equiv), (*E*)-2-benzoyl-3-phenylacrylonitrile **2a** (23.3 mg, 0.0999 mmol, 1.0 equiv), cesium carbonate (48.9 mg, 0.150 mmol, 1.5 equiv), **C2** (3.2 mg, 10

mol%) and 4 Å MS (40.0 mg) in distilled toluene (1.0 mL) was stirred at 60 °C for 20 h, and the reaction was monitored by TLC. After completion, the mixture was directly purified by flash chromatography on silica gel (EtOAc/petroleum ether = 1/40 to 1/30) to give the product **3a**: 29.7 mg (0.0920 mmol), as a white solid, 92% yield; mp = 146–148 °C; <sup>1</sup>H NMR (400 MHz, CDCl<sub>3</sub>): δ (ppm) 7.96–7.86 (m, 2H), 7.57–7.51 (m, 1H), 7.49–7.40 (m, 6H), 7.40–7.30 (m, 3H), 7.27–7.18 (m, 3H), 4.33 (d, *J* = 8.8 Hz, 1H), 3.95 (d, *J* = 8.8 Hz, 1H); <sup>13</sup>C NMR (100 MHz, CDCl<sub>3</sub>): δ (ppm) 188.3, 135.8, 133.8, 133.6, 131.4, 129.0, 128.94, 128.86, 128.7, 128.64, 128.61, 128.58, 128.5, 118.5, 43.0, 35.8, 33.8; HRMS (ESI-TOF) *m/z*: [M + Na]<sup>+</sup> Calcd for C<sub>23</sub>H<sub>17</sub>NONa<sup>+</sup> 346.1202; Found 346.1205.

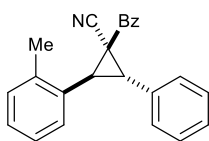

**Synthesis of 3b:** A mixture of 1-(bromomethyl)-2-methylbenzene **1b** (22.1 mg, 0.119 mmol, 1.2 equiv), (*E*)-2-benzoyl-3-phenylacrylonitrile **2a** (23.3 mg, 0.0999 mmol, 1.0 equiv), cesium carbonate (48.9 mg, 0.150 mmol, 1.5 equiv),

**C2** (3.2 mg, 10 mol%) and 4 Å MS (40.0 mg) in distilled toluene (1.0 mL) was stirred at 60 °C for 40 h, and the reaction was monitored by TLC. After completion, the mixture was directly purified by flash chromatography on silica gel (EtOAc/petroleum ether = 1/40 to 1/30) to give the product **3b**: 30.7 mg (0.0911 mmol), as a white solid, 91% yield; mp = 144–146 °C; <sup>1</sup>H NMR (400 MHz, CDCl<sub>3</sub>): δ (ppm) 8.01–7.91 (m, 2H), 7.58–7.52 (m, 1H), 7.50–7.36 (m, 7H), 7.25–7.11 (m, 4H), 4.34 (d, *J* = 9.2 Hz, 1H), 3.91 (d, *J* = 9.2 Hz, 1H), 2.50 (s, 3H); <sup>13</sup>C NMR (100 MHz, CDCl<sub>3</sub>): δ (ppm) 188.3, 138.0, 136.1, 133.7, 133.5, 130.4, 129.8, 129.0, 128.9, 128.8, 128.7, 128.61, 128.59, 128.5, 126.0, 119.0, 43.1, 36.9, 35.3, 20.0; HRMS (ESI-TOF) *m/z*: [M + H]<sup>+</sup> Calcd for C<sub>24</sub>H<sub>20</sub>NO<sup>+</sup> 338.1539; Found 338.1541.

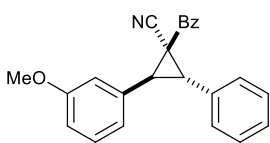

**Synthesis of 3c:** A mixture of 1-(bromomethyl)-3-methoxybenzene **1c** (24.0 mg, 0.119 mmol, 1.2 equiv), (*E*)-2-benzoyl-3-phenylacrylonitrile **2a** (23.3 mg, 0.0999 mmol, 1.0 equiv), cesium carbonate (48.9 mg, 0.150 mmol, 1.5

equiv), **C2** (3.2 mg, 10 mol%) and 4 Å MS (40.0 mg) in distilled toluene (1.0 mL) was stirred at 60 °C for 20 h, and the reaction was monitored by TLC. After completion, the mixture was directly purified by flash chromatography on silica gel (EtOAc/petroleum ether = 1/40 to 1/30) to give the product **3c**: 30.1 mg (0.0852 mmol), as a colorless oil, 85% yield; <sup>1</sup>H NMR (400 MHz, CDCl<sub>3</sub>): δ (ppm) 7.97–7.91 (m, 2H), 7.58–7.52 (m, 1H), 7.49–7.41 (m, 6H), 7.40–7.34 (m, 1H), 7.16 (t, *J* = 8.0 Hz, 1H), 6.94–6.89 (m, 1H), 6.86–6.82 (m, 1H), 6.77–6.72 (m, 1H), 4.29 (d, *J* = 8.8 Hz, 1H), 3.91 (d, *J* = 8.8 Hz, 1H), 3.71 (s, 3H); <sup>13</sup>C NMR (100 MHz, CDCl<sub>3</sub>): δ (ppm) 188.2, 159.6, 135.8,

133.8, 133.6, 133.0, 129.7, 129.1, 128.9, 128.63, 128.61, 128.5, 121.2, 118.5, 114.5, 114.2, 55.2, 42.9, 35.7, 33.9; HRMS (ESI-TOF)  $m/z$ :  $[M + Na]^+$  Calcd for  $C_{24}H_{19}NO_2Na^+$  376.1308; Found 376.1303.

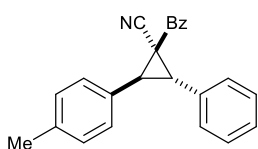

**Synthesis of 3d:** A mixture of 1-(bromomethyl)-4-methylbenzene **1d** (22.1 mg, 0.119 mmol, 1.2 equiv), (*E*)-2-benzoyl-3-phenylacrylonitrile **2a** (23.3 mg, 0.0999 mmol, 1.0 equiv), cesium carbonate (48.9 mg, 0.150 mmol, 1.5 equiv), **C2** (3.2 mg, 10 mol%) and 4 Å MS (40.0 mg) in distilled toluene (1.0 mL) was stirred at 60 °C for 20 h, and the reaction was monitored by TLC. After completion, the mixture was directly purified by flash chromatography on silica gel (EtOAc/petroleum ether = 1/50 to 1/40) to give the product **3d**: 30.7 mg (0.0911 mmol), as a white solid, 91% yield; mp = 142–144 °C;  $^1H$  NMR (400 MHz,  $CDCl_3$ ):  $\delta$  (ppm) 8.00–7.84 (m, 2H), 7.56–7.50 (m, 1H), 7.49–7.29 (m, 7H), 7.26–7.19 (m, 2H), 7.05 (d,  $J$  = 8.0 Hz, 2H), 4.31 (d,  $J$  = 8.8 Hz, 1H), 3.93 (d,  $J$  = 8.8 Hz, 1H), 2.23 (s, 3H);  $^{13}C$  NMR (100 MHz,  $CDCl_3$ ):  $\delta$  (ppm) 188.5, 138.5, 135.9, 133.72, 133.70, 129.4, 129.1, 129.0, 128.74, 128.66, 128.6, 128.4, 128.3, 118.6, 43.1, 35.9, 33.8, 21.1; HRMS (ESI-TOF)  $m/z$ :  $[M + Na]^+$  Calcd for  $C_{24}H_{19}NONa^+$  360.1359; Found 360.1352.

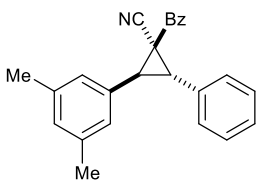

**Synthesis of 3e:** A mixture of 1-(bromomethyl)-3,5-dimethylbenzene **1e** (23.8 mg, 0.120 mmol, 1.2 equiv), (*E*)-2-benzoyl-3-phenylacrylonitrile **2a** (23.3 mg, 0.0999 mmol, 1.0 equiv), cesium carbonate (48.9 mg, 0.150 mmol, 1.5 equiv), **C2** (3.2 mg, 10 mol%) and 4 Å MS (40.0 mg) in distilled toluene (1.0 mL) was stirred at 60 °C for 40 h, and the reaction was monitored by TLC. After completion, the mixture was directly purified by flash chromatography on silica gel (EtOAc/petroleum ether = 1/40 to 1/30) to give the product **3e**: 30.8 mg (0.0877 mmol), as a white solid, 88% yield; mp = 124–126 °C;  $^1H$  NMR (400 MHz,  $CDCl_3$ ):  $\delta$  (ppm) 7.94–7.91 (m, 2H), 7.58–7.51 (m, 1H), 7.50–7.40 (m, 6H), 7.39–7.32 (m, 1H), 6.93 (s, 2H), 6.83 (s, 1H), 4.28 (d,  $J$  = 8.8 Hz, 1H), 3.88 (d,  $J$  = 8.8 Hz, 1H), 2.21 (s, 6H);  $^{13}C$  NMR (100 MHz,  $CDCl_3$ ):  $\delta$  (ppm) 188.4, 138.2, 135.9, 133.8, 133.7, 131.3, 130.3, 129.1, 128.9, 128.6, 128.5, 128.4, 126.7, 118.7, 43.2, 35.8, 33.9, 21.2; HRMS (ESI-TOF)  $m/z$ :  $[M + H]^+$  Calcd for  $C_{25}H_{22}NO^+$  352.1696; Found 352.1691.

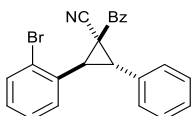

**Synthesis of 3f:** A mixture of 1-bromo-2-(bromomethyl)benzene **1f** (29.7 mg, 0.119 mmol, 1.2 equiv), (*E*)-2-benzoyl-3-phenylacrylonitrile **2a** (23.3 mg, 0.0999

mmol, 1.0 equiv), cesium carbonate (48.9 mg, 0.150 mmol, 1.5 equiv), **C2** (3.2 mg, 10 mol%) and 4 Å MS (40.0 mg) in distilled toluene (1.0 mL) was stirred at 60 °C for 40 h, and the reaction was monitored by TLC. After completion, the mixture was directly purified by flash chromatography on silica gel (EtOAc/petroleum ether = 1/50 to 1/40) to give the product **3f**: 30.0 mg (0.0748 mmol), as a white solid, 75% yield; mp = 103–105 °C; <sup>1</sup>H NMR (400 MHz, CDCl<sub>3</sub>): δ (ppm) 8.12–8.00 (m, 2H), 7.57–7.51 (m, 2H), 7.49–7.36 (m, 7H), 7.34–7.27 (m, 2H), 7.17–7.11 (m, 1H), 4.33 (d, *J* = 9.2 Hz, 1H), 4.07 (d, *J* = 9.2 Hz, 1H); <sup>13</sup>C NMR (100 MHz, CDCl<sub>3</sub>): δ (ppm) 188.8, 136.0, 133.6, 133.2, 132.9, 131.2, 130.5, 130.1, 129.3, 129.0, 128.72, 128.69, 128.4, 127.4, 126.5, 118.4, 44.6, 37.1, 36.0; HRMS (ESI-TOF) *m/z*: [M + Na]<sup>+</sup> Calcd for C<sub>23</sub>H<sub>16</sub><sup>79</sup>BrNONa<sup>+</sup> 424.0307; Found 424.0310; Calcd for C<sub>23</sub>H<sub>16</sub><sup>81</sup>BrNONa<sup>+</sup> 426.0287; Found 426.0292.

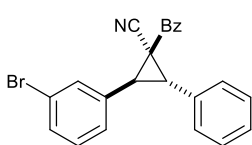

**Synthesis of 3g:** A mixture of 1-bromo-3-(bromomethyl)benzene **1g** (29.7 mg, 0.119 mmol, 1.2 equiv), (*E*)-2-benzoyl-3-phenylacrylonitrile **2a** (23.3 mg, 0.0999 mmol, 1.0 equiv), cesium carbonate (48.9 mg, 0.150 mmol, 1.5 equiv),

**C2** (3.2 mg, 10 mol%) and 4 Å MS (40.0 mg) in distilled toluene (1.0 mL) was stirred at 60 °C for 20 h, and the reaction was monitored by TLC. After completion, the mixture was directly purified by flash chromatography on silica gel (EtOAc/petroleum ether = 1/40 to 1/30) to give the product **3g**: 33.3 mg (0.0830 mmol), as a white solid, 83% yield; mp = 162–164 °C; <sup>1</sup>H NMR (400 MHz, CDCl<sub>3</sub>): δ (ppm) 7.98–7.87 (m, 2H), 7.62–7.54 (m, 1H), 7.52–7.32 (m, 9H), 7.24 (d, *J* = 7.6 Hz, 1H), 7.13–7.02 (m, 1H), 4.27 (d, *J* = 8.8 Hz, 1H), 3.87 (d, *J* = 8.8 Hz, 1H); <sup>13</sup>C NMR (100 MHz, CDCl<sub>3</sub>): δ (ppm) 188.0, 135.6, 134.0, 133.8, 133.1, 132.1, 131.7, 130.1, 129.0 (2C), 128.7, 128.62, 128.57, 127.4, 122.7, 118.2, 41.2, 35.8, 34.0; HRMS (ESI-TOF) *m/z*: [M + Na]<sup>+</sup> Calcd for C<sub>23</sub>H<sub>16</sub><sup>79</sup>BrNONa<sup>+</sup> 424.0307; Found 424.0320; Calcd for C<sub>23</sub>H<sub>16</sub><sup>81</sup>BrNONa<sup>+</sup> 426.0287; Found 426.0304.

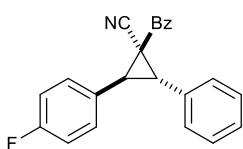

**Synthesis of 3h:** A mixture of 1-(bromomethyl)-4-fluorobenzene **1h** (22.6 mg, 0.120 mmol, 1.2 equiv), (*E*)-2-benzoyl-3-phenylacrylonitrile **2a** (23.3 mg, 0.0999 mmol, 1.0 equiv), cesium carbonate (48.9 mg, 0.150 mmol, 1.5 equiv),

**C2** (3.2 mg, 10 mol%) and 4 Å MS (40.0 mg) in distilled toluene (1.0 mL) was stirred at 60 °C for 40 h, and the reaction was monitored by TLC. After completion, the mixture was directly purified by flash chromatography on silica gel (EtOAc/petroleum ether = 1/40 to 1/30) to give the product **3h**: 30.0 mg (0.0879 mmol), as a white solid, 88% yield; mp = 138–140 °C; <sup>1</sup>H NMR (400 MHz,

CDCl<sub>3</sub>):  $\delta$  (ppm) 7.98–7.84 (m, 2H), 7.62–7.52 (m, 1H), 7.50–7.35 (m, 7H), 7.34–7.27 (m, 2H), 7.00–6.86 (m, 2H), 4.28 (d,  $J = 8.8$  Hz, 1H), 3.92 (d,  $J = 8.8$  Hz, 1H); <sup>13</sup>C NMR (100 MHz, CDCl<sub>3</sub>):  $\delta$  (ppm) 188.2, 162.3 (d, <sup>1</sup>J<sub>FC</sub> = 247.0 Hz), 135.7, 133.9, 133.3, 130.6 (d, <sup>3</sup>J<sub>FC</sub> = 8.4 Hz), 129.0 (2C), 128.7, 128.60, 128.56, 127.2 (d, <sup>4</sup>J<sub>FC</sub> = 3.4 Hz), 118.4, 115.7 (d, <sup>2</sup>J<sub>FC</sub> = 21.8 Hz), 42.2, 35.8, 34.1; <sup>19</sup>F NMR (376 MHz, CDCl<sub>3</sub>):  $\delta$  (ppm) –112.6 (m); HRMS (ESI-TOF)  $m/z$ : [M + H]<sup>+</sup> Calcd for C<sub>23</sub>H<sub>17</sub>FNO<sup>+</sup> 342.1289; Found 342.1289.

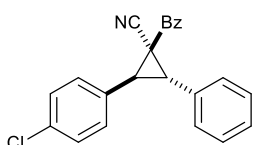

**Synthesis of 3i:** A mixture of 1-(bromomethyl)-4-chlorobenzene **1i** (24.5 mg, 0.119 mmol, 1.2 equiv), (*E*)-2-benzoyl-3-phenylacrylonitrile **2a** (23.3 mg, 0.0999 mmol, 1.0 equiv), cesium carbonate (48.9 mg, 0.150 mmol, 1.5 equiv), **C2** (3.2 mg, 10 mol%) and 4 Å MS (40.0 mg) in distilled toluene (1.0 mL) was stirred at 60 °C for 20 h, and the reaction was monitored by TLC. After completion, the mixture was directly purified by flash chromatography on silica gel (EtOAc/petroleum ether = 1/50 to 1/40) to give the product **3i**: 31.0 mg (0.0868 mmol), as a white solid, 87% yield; mp = 142–144 °C; <sup>1</sup>H NMR (400 MHz, CDCl<sub>3</sub>):  $\delta$  (ppm) 8.03–7.82 (m, 2H), 7.59–7.53 (m, 1H), 7.51–7.35 (m, 7H), 7.31–7.18 (m, 4H), 4.28 (d,  $J = 8.8$  Hz, 1H), 3.89 (d,  $J = 8.8$  Hz, 1H); <sup>13</sup>C NMR (100 MHz, CDCl<sub>3</sub>):  $\delta$  (ppm) 188.1, 135.6, 134.6, 134.0, 133.2, 130.2, 130.0, 129.0 (2C), 128.9, 128.7, 128.6 (2C), 118.3, 42.1, 35.8, 34.0; HRMS (ESI-TOF)  $m/z$ : [M + H]<sup>+</sup> Calcd for C<sub>23</sub>H<sub>17</sub><sup>35</sup>ClNO<sup>+</sup> 358.0993; Found 358.0987; Calcd for C<sub>23</sub>H<sub>17</sub><sup>37</sup>ClNO<sup>+</sup> 360.0964; Found 360.0965; [M + Na]<sup>+</sup> Calcd for C<sub>23</sub>H<sub>16</sub><sup>35</sup>ClNONa<sup>+</sup> 380.0813; Found 380.0808; Calcd for C<sub>23</sub>H<sub>16</sub><sup>37</sup>ClNONa<sup>+</sup> 382.0783; Found 382.0786.

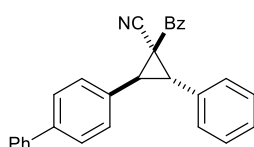

**Synthesis of 3j:** A mixture of 4-(bromomethyl)-1,1'-biphenyl **1j** (29.5 mg, 0.119 mmol, 1.2 equiv), (*E*)-2-benzoyl-3-phenylacrylonitrile **2a** (23.3 mg, 0.0999 mmol, 1.0 equiv), cesium carbonate (48.9 mg, 0.150 mmol, 1.5 equiv), **C2** (3.2 mg, 10 mol%) and 4 Å MS (40.0 mg) in distilled toluene (1.0 mL) was stirred at 60 °C for 20 h and stirred at 80 °C for another 24 h, and the reaction was monitored by TLC. After completion, the mixture was directly purified by flash chromatography on silica gel (EtOAc/petroleum ether = 1/40 to 1/30) to give the product **3j**: 37.6 mg (0.0942 mmol), as a white solid, 94% yield; mp = 165–167 °C; <sup>1</sup>H NMR (400 MHz, CDCl<sub>3</sub>):  $\delta$  (ppm) 7.94 (d,  $J = 8.0$  Hz, 2H), 7.57–7.51 (m, 1H), 7.51–7.35 (m, 15H), 7.34–7.27 (m, 1H), 4.37 (d,  $J = 8.8$  Hz, 1H), 3.98 (d,  $J = 8.8$  Hz, 1H); <sup>13</sup>C NMR (100 MHz, CDCl<sub>3</sub>):  $\delta$  (ppm) 188.4, 141.3, 140.1, 135.8, 133.8, 133.6, 130.4,

129.3, 129.1, 129.0, 128.8, 128.7, 128.5, 127.6, 127.3, 127.0 (2C), 118.5, 42.9, 36.0, 33.9; HRMS (ESI-TOF)  $m/z$ :  $[M + Na]^+$  Calcd for  $C_{29}H_{21}NONa^+$  422.1515; Found 422.1510.

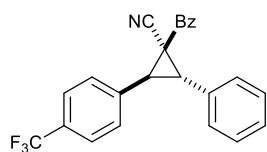

**Synthesis of 3k:** A mixture of 1-(bromomethyl)-4-(trifluoromethyl)benzene

**1k** (28.6 mg, 0.120 mmol, 1.2 equiv), (*E*)-2-benzoyl-3-phenylacrylonitrile

**2a** (23.3 mg, 0.0999 mmol, 1.0 equiv), cesium carbonate (48.9 mg, 0.150

mmol, 1.5 equiv), **C2** (3.2 mg, 10 mol%) and 4 Å MS (40.0 mg) in distilled toluene (1.0 mL) was stirred at 60 °C for 40 h, and the reaction was monitored by TLC. After completion, the mixture was directly purified by flash chromatography on silica gel (EtOAc/petroleum ether = 1/50 to 1/40) to give the product **3k**: 32.4 mg (0.0828 mmol), as a white solid, 83% yield; mp = 145–147 °C;  $^1H$  NMR (400 MHz,  $CDCl_3$ ):  $\delta$  (ppm) 7.92 ( $J = 8.8$  Hz, 2H), 7.60–7.50 (m, 3H), 7.49–7.34 (m, 9H), 4.34 (d,  $J = 8.8$  Hz, 1H), 3.95 (d,  $J = 8.8$  Hz, 1H);  $^{13}C$  NMR (100 MHz,  $CDCl_3$ ):  $\delta$  (ppm) 188.0, 135.61 (d,  $^4J_{FC} = 1.0$  Hz), 135.56, 134.1, 133.0, 130.7 (q,  $^2J_{FC} = 32.7$  Hz), 129.3, 129.05, 128.97, 128.8, 128.7, 128.6, 125.7 (q,  $^3J_{FC} = 3.8$  Hz), 123.8 (d,  $^1J_{FC} = 272.4$  Hz), 118.1, 42.0, 35.8, 34.2;  $^{19}F$  NMR (376 MHz,  $CDCl_3$ ):  $\delta$  (ppm) –62.8; HRMS (ESI-TOF)  $m/z$ :  $[M + H]^+$  Calcd for  $C_{24}H_{17}F_3NO^+$  392.1257; Found 392.1257.

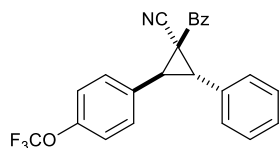

**Synthesis of 3l:** A mixture of 1-(bromomethyl)-4-(trifluoromethoxy)

benzene **1l** (30.6 mg, 0.120 mmol, 1.2 equiv), (*E*)-2-benzoyl-3-phenyl-

acrylonitrile **2a** (23.3 mg, 0.0999 mmol, 1.0 equiv), cesium carbonate (48.9

mg, 0.150 mmol, 1.5 equiv), **C2** (3.2 mg, 10 mol%) and 4 Å MS (40.0 mg) in distilled toluene (1.0 mL) was stirred at 60 °C for 40 h, and the reaction was monitored by TLC. After completion, the mixture was directly purified by flash chromatography on silica gel (EtOAc/petroleum ether = 1/50 to 1/40) to give the product **3l**: 37.3 mg (0.0916 mmol), as a colorless oil, 92% yield;  $^1H$  NMR (400 MHz,  $CDCl_3$ ):  $\delta$  (ppm) 7.95–7.90 (m, 2H), 7.59–7.54 (m, 1H), 7.48–7.42 (m, 6H), 7.40–7.34 (m, 3H), 7.13–7.08 (m, 2H), 4.29 (d,  $J = 8.8$  Hz, 1H), 3.91 (d,  $J = 8.8$  Hz, 1H);  $^{13}C$  NMR (100 MHz,  $CDCl_3$ ):  $\delta$  (ppm) 188.2, 149.2, 135.7, 134.0, 133.2, 130.4, 130.1, 129.4, 129.01, 128.97, 128.7, 128.63, 128.58, 120.9, 118.2, 41.9, 35.8, 34.2;  $^{19}F$  NMR (376 MHz,  $CDCl_3$ ):  $\delta$  (ppm) –57.8; HRMS (ESI-TOF)  $m/z$ :  $[M + Na]^+$  Calcd for  $C_{24}H_{16}F_3NO_2Na^+$  430.1025; Found 430.1026.

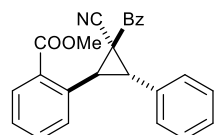

**Synthesis of 3m:** A mixture of methyl 2-(bromomethyl)benzoate **1m** (27.4 mg,

0.120 mmol, 1.2 equiv), (*E*)-2-benzoyl-3-phenylacrylonitrile **2a** (23.3 mg,

0.0999 mmol, 1.0 equiv), cesium carbonate (48.9 mg, 0.150 mmol, 1.5 equiv), **C2** (3.2 mg, 10 mol%) and 4 Å MS (40.0 mg) in distilled toluene (1.0 mL) was stirred at 60 °C for 20 h, and the reaction was monitored by TLC. After completion, the mixture was directly purified by flash chromatography on silica gel (EtOAc/petroleum ether = 1/40 to 1/30) to give the product **3m**: 15.9 mg (0.0417 mmol), as a white solid, 42% yield; mp = 132–134 °C; <sup>1</sup>H NMR (400 MHz, CDCl<sub>3</sub>): δ (ppm) 8.02–7.96(m, 3H), 7.55–7.33 (m, 11H), 4.56 (d, *J* = 9.6 Hz, 1H), 4.35 (d, *J* = 9.6 Hz, 1H), 3.95 (s, 3H); <sup>13</sup>C NMR (100 MHz, CDCl<sub>3</sub>): δ (ppm) 189.3, 167.0, 136.2, 133.7, 133.5, 133.4, 132.5, 131.4, 130.4, 130.0, 129.2, 128.9, 128.7, 128.6, 128.5, 128.3, 118.9, 52.5, 43.5, 37.5, 36.8; HRMS (ESI-TOF) *m/z*: [M + Na]<sup>+</sup> Calcd for C<sub>25</sub>H<sub>19</sub>NO<sub>3</sub>Na<sup>+</sup> 404.1257; Found 404.1259.

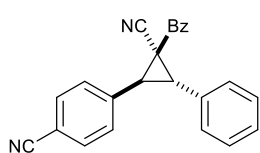

**Synthesis of 3n**: A mixture of 4-(bromomethyl)benzonitrile **1n** (23.5 mg, 0.120 mmol, 1.2 equiv), (*E*)-2-benzoyl-3-phenylacrylonitrile **2a** (23.3 mg, 0.0999 mmol, 1.0 equiv), cesium carbonate (48.9 mg, 0.150 mmol, 1.5 equiv),

**C2** (3.2 mg, 10 mol%) and 4 Å MS (40.0 mg) in distilled toluene (1.0 mL) was stirred at 60 °C for 20 h, and the reaction was monitored by TLC. After completion, the mixture was directly purified by flash chromatography on silica gel (EtOAc/petroleum ether = 1/30 to 1/20) to give the product **3n**: 30.2 mg (0.0868 mmol), as a white solid, 87% yield; mp = 152–154 °C; <sup>1</sup>H NMR (400 MHz, CDCl<sub>3</sub>): δ (ppm) 7.94–7.87 (m, 2H), 7.61–7.53 (m, 3H), 7.49–7.37 (m, 9H), 4.30 (d, *J* = 8.8 Hz, 1H), 3.93 (d, *J* = 8.8 Hz, 1H); <sup>13</sup>C NMR (100 MHz, CDCl<sub>3</sub>): δ (ppm) 187.8, 137.0, 135.4, 134.2, 132.7, 132.4, 129.7, 129.1, 129.0, 128.8 (2C), 128.5, 118.2, 117.9, 112.5, 41.8, 35.9, 34.2; HRMS (ESI-TOF) *m/z*: [M + Na]<sup>+</sup> Calcd for C<sub>24</sub>H<sub>17</sub>N<sub>2</sub>O<sup>+</sup> 349.1335; Found 349.1332.

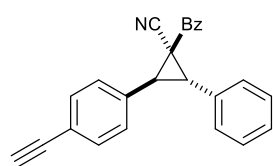

**Synthesis of 3o**: A mixture of benzyl 1-(bromomethyl)-4-ethynylbenzene **1o** (23.3 mg, 0.119 mmol, 1.2 equiv), (*E*)-2-(furan-2-carbonyl)-3-phenylacrylonitrile **2a** (22.3 mg, 0.100 mmol, 1.0 equiv), cesium carbonate (48.9 mg, 0.150 mmol, 1.5 equiv), **C2** (3.2 mg, 10 mol%) and 4 Å MS (40.0

mg) in distilled toluene (1.0 mL) was stirred at 60 °C for 40 h, and the reaction was monitored by TLC. After completion, the mixture was directly purified by flash chromatography on silica gel (EtOAc/petroleum ether = 1/50 to 1/40) to give the product **3o**: 24.6 mg (0.0709 mmol), as a white solid, 71% yield; mp = 64–66 °C; <sup>1</sup>H NMR (400 MHz, CDCl<sub>3</sub>): δ (ppm) 7.96–7.88 (m, 2H), 7.60–7.35 (m, 10H), 7.34–7.26 (m, 2H), 4.30 (d, *J* = 8.8 Hz, 1H), 3.91 (d, *J* = 8.8 Hz, 1H), 3.05 (s, 1H); <sup>13</sup>C NMR (100 MHz, CDCl<sub>3</sub>): δ (ppm) 188.0, 135.6, 134.0, 133.3, 132.4, 132.2, 129.01, 128.98,

128.8, 128.7, 128.6, 127.5, 122.4, 118.3, 112.6, 82.8, 42.5, 35.9, 33.8; HRMS (ESI-TOF)  $m/z$ :  $[M + Na]^+$  Calcd for  $C_{25}H_{17}NONa^+$  370.1202; Found 370.1206.

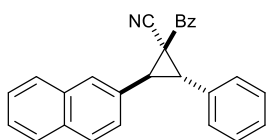

**Synthesis of 3p:** A mixture of 2-(bromomethyl)naphthalene **1p** (26.4 mg, 0.119 mmol, 1.2 equiv), (*E*)-2-benzoyl-3-phenylacrylonitrile **2a** (23.3 mg, 0.0999 mmol, 1.0 equiv), cesium carbonate (48.9 mg, 0.150 mmol, 1.5 equiv), **C2** (3.2 mg, 10 mol%) and 4 Å MS (40.0 mg) in distilled toluene (1.0 mL) was stirred at 60 °C for 20 h, and the reaction was monitored by TLC. After completion, the mixture was directly purified by flash chromatography on silica gel (EtOAc/petroleum ether = 1/40 to 1/30) to give the product **3p**: 36.9 mg (0.0989 mmol), as a white solid, 99% yield; mp = 152–154 °C;  $^1H$  NMR (400 MHz,  $CDCl_3$ ):  $\delta$  (ppm) 7.97–7.90 (m, 2H), 7.81–7.75 (m, 2H), 7.74–7.67 (m, 2H), 7.56–7.33 (m, 11H), 4.47 (d,  $J = 8.8$  Hz, 1H), 4.10 (d,  $J = 8.8$  Hz, 1H);  $^{13}C$  NMR (100 MHz,  $CDCl_3$ ):  $\delta$  (ppm) 188.2, 135.7, 133.8, 133.6, 133.1, 133.0, 129.1, 129.0, 128.8, 128.7, 128.6, 128.53, 128.52, 128.2, 128.0, 127.7, 126.6 (2C), 126.3, 118.6, 43.3, 36.0, 34.0; HRMS (ESI-TOF)  $m/z$ :  $[M + Na]^+$  Calcd for  $C_{27}H_{19}NONa^+$  396.1359; Found 396.1355.

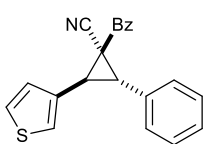

**Synthesis of 3q:** A mixture of 3-(bromomethyl)thiophene **1q** (21.1 mg, 0.119 mmol, 1.2 equiv), (*E*)-2-(furan-2-carbonyl)-3-phenylacrylonitrile **2a** (22.3 mg, 0.100 mmol, 1.0 equiv), cesium carbonate (48.9 mg, 0.150 mmol, 1.5 equiv), **C2** (3.2 mg, 10 mol%) and 4 Å MS (40.0 mg) in distilled toluene (1.0 mL) was stirred at 60 °C for 20 h and 80 °C for 20 h, and the reaction was monitored by TLC. After completion, the mixture was directly purified by flash chromatography on silica gel (EtOAc/petroleum ether = 1/50 to 1/40) to give the product **3q**: 22.2 mg (0.0674 mmol), as a white solid, 67% yield; mp = 130–132 °C;  $^1H$  NMR (400 MHz,  $CDCl_3$ ):  $\delta$  (ppm) 7.95–7.90 (m, 2H), 7.58–7.53 (m, 1H), 7.47–7.40 (m, 6H), 7.39–7.34 (m, 1H), 7.23–7.20 (m, 1H), 7.19–7.16 (m, 1H), 7.02 (dd,  $J = 4.8, 1.6$  Hz, 1H), 4.20 (d,  $J = 8.8$  Hz, 1H), 3.89 (d,  $J = 8.8$  Hz, 1H);  $^{13}C$  NMR (100 MHz,  $CDCl_3$ ):  $\delta$  (ppm) 188.3, 135.6, 133.9, 133.4, 132.4, 129.0, 128.9, 128.7, 128.5, 128.4, 127.6, 126.4, 124.6, 118.3, 38.0, 35.7, 34.6; HRMS (ESI-TOF)  $m/z$ :  $[M + Na]^+$  Calcd for  $C_{21}H_{15}NOSNa^+$  352.0767; Found 352.0763.

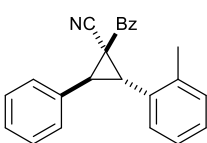

**Synthesis of 3r:** A mixture of benzyl bromide **1a** (20.4 mg, 0.119 mmol, 1.2 equiv), (*E*)-2-benzoyl-3-(*o*-tolyl)acrylonitrile **2b** (24.7 mg, 0.100 mmol, 1.0 equiv), cesium carbonate (48.9 mg, 0.150 mmol, 1.5 equiv), **C2** (3.2 mg, 10



mol%) and 4 Å MS (40.0 mg) in distilled toluene (1.0 mL) was stirred at 60 °C for 20 h, and the reaction was monitored by TLC. After completion, the mixture was directly purified by flash chromatography on silica gel (EtOAc/petroleum ether = 1/50 to 1/40) to give the product **3r**: 28.2 mg (0.0836 mmol), as a white solid, 84% yield; mp = 137–139 °C; <sup>1</sup>H NMR (400 MHz, CDCl<sub>3</sub>): δ (ppm) 7.97–7.86 (m, 2H), 7.57–7.50 (m, 1H), 7.47–7.40 (m, 2H), 7.37–7.13 (m, 9H), 4.25 (d, *J* = 8.8 Hz, 1H), 3.99 (d, *J* = 8.8 Hz, 1H), 2.43 (s, 3H); <sup>13</sup>C NMR (100 MHz, CDCl<sub>3</sub>): δ (ppm) 188.4, 138.7, 135.7, 133.8, 132.3, 131.5, 130.6, 129.1, 128.9, 128.69, 128.66, 128.63, 128.61, 127.9, 126.3, 118.5, 43.2, 34.8, 32.8, 19.6; HRMS (ESI-TOF) *m/z*: [M + Na]<sup>+</sup> Calcd for C<sub>24</sub>H<sub>19</sub>NONa<sup>+</sup> 360.1359; Found 360.1363.

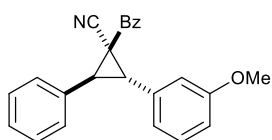

**Synthesis of 3s:** A mixture of benzyl bromide **1a** (20.4 mg, 0.119 mmol, 1.2 equiv), (*E*)-2-benzoyl-3-(3-methoxyphenyl)acrylonitrile **2c** (26.3 mg, 0.0999 mmol, 1.0 equiv), cesium carbonate (48.9 mg, 0.150 mmol, 1.5 equiv), **C2** (3.2 mg, 10 mol%) and 4 Å MS (40.0 mg) in distilled toluene (1.0 mL) was stirred at 60 °C for 20 h, and the reaction was monitored by TLC. After completion, the mixture was directly purified by flash chromatography on silica gel (EtOAc/petroleum ether = 1/40 to 1/30) to give the product **3s**: 27.2 mg (0.0770 mmol), as a white solid, 77% yield; mp = 110–112 °C; <sup>1</sup>H NMR (400 MHz, CDCl<sub>3</sub>): δ (ppm) 7.98–7.86 (m, 2H), 7.57–7.50 (m, 1H), 7.47–7.39 (m, 2H), 7.38–7.29 (m, 3H), 7.28–7.18 (m, 3H), 7.04 (d, *J* = 8.0 Hz, 1H), 7.01–6.96 (m, 1H), 6.91 (dd, *J* = 8.4, 2.4 Hz, 1H), 4.30 (d, *J* = 8.8 Hz, 1H), 3.93 (d, *J* = 8.8 Hz, 1H), 3.83 (s, 3H); <sup>13</sup>C NMR (100 MHz, CDCl<sub>3</sub>): δ (ppm) 188.3, 159.9, 135.7, 135.1, 133.8, 131.4, 130.0, 129.1, 128.9, 128.7, 128.61, 128.59, 120.8, 118.5, 114.4, 114.1, 55.4, 43.0, 35.8, 33.8; HRMS (ESI-TOF) *m/z*: [M + H]<sup>+</sup> Calcd for C<sub>24</sub>H<sub>20</sub>NO<sub>2</sub><sup>+</sup> 354.1489; Found 354.1485.

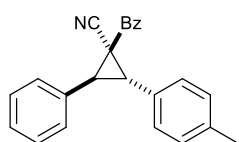

**Synthesis of 3t:** A mixture of benzyl bromide **1a** (20.4 mg, 0.119 mmol, 1.2 equiv), (*E*)-2-benzoyl-3-(*p*-tolyl)acrylonitrile **2d** (24.7 mg, 0.0999 mmol, 1.0 equiv), cesium carbonate (48.9 mg, 0.150 mmol, 1.5 equiv), **C2** (3.2 mg, 10 mol%) and 4 Å MS (40.0 mg) in distilled toluene (1.0 mL) was stirred at 60 °C for 20 h, and the reaction was monitored by TLC. After completion, the mixture was directly purified by flash chromatography on silica gel (EtOAc/petroleum ether = 1/40 to 1/30) to give the product **3t**: 28.6 mg (0.0848 mmol), as a white solid, 85% yield; mp = 153–155 °C; <sup>1</sup>H NMR (400 MHz, CDCl<sub>3</sub>): δ (ppm) 7.96–7.88 (m, 2H), 7.56–7.51 (m, 1H), 7.46–7.39 (m, 2H), 7.37–7.30 (m, 4H), 7.28–7.18 (m,

5H), 4.29 (d,  $J = 8.8$  Hz, 1H), 3.92 (d,  $J = 8.8$  Hz, 1H), 2.37 (s, 3H);  $^{13}\text{C}$  NMR (100 MHz,  $\text{CDCl}_3$ ):  $\delta$  (ppm) 188.4, 138.3, 135.9, 133.7, 131.5, 130.5, 129.6, 129.0, 128.9, 128.64, 128.59, 128.53, 128.48, 118.7, 43.1, 35.9, 33.7, 21.2; HRMS (ESI-TOF)  $m/z$ :  $[\text{M} + \text{Na}]^+$  Calcd for  $\text{C}_{24}\text{H}_{19}\text{NONa}^+$  360.1359; Found 360.1369.

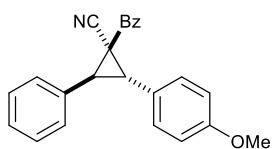

**Synthesis of 3u:** A mixture of benzyl bromide **1a** (20.4 mg, 0.119 mmol, 1.2 equiv), (*E*)-2-benzoyl-3-(4-methoxyphenyl)acrylonitrile **2e** (26.3 mg, 0.0999 mmol, 1.0 equiv), cesium carbonate (48.9 mg, 0.150 mmol, 1.5 equiv), **C2** (3.2 mg, 10 mol%) and 4 Å MS (40.0 mg) in distilled toluene (1.0 mL) was stirred at 60 °C for 40 h, and the reaction was monitored by TLC. After completion, the mixture was directly purified by flash chromatography on silica gel (EtOAc/petroleum ether = 1/40 to 1/30) to give the product **3u**: 32.5 mg (0.0920 mmol), as a white solid, 92% yield; mp = 81–83 °C;  $^1\text{H}$  NMR (400 MHz,  $\text{CDCl}_3$ ):  $\delta$  (ppm) 7.91 (dd,  $J = 8.0, 1.6$  Hz 2H), 7.57–7.51 (m, 1H), 7.46–7.31 (m, 6H), 7.29–7.18 (m, 3H), 6.96 (d,  $J = 8.4$  Hz, 2H), 4.28 (d,  $J = 8.8$  Hz, 1H), 3.91 (d,  $J = 8.8$  Hz, 1H), 3.82 (s, 3H);  $^{13}\text{C}$  NMR (100 MHz,  $\text{CDCl}_3$ ):  $\delta$  (ppm) 188.5, 159.7, 135.9, 133.7, 131.5, 129.8, 129.0, 128.9, 128.63, 128.58, 128.5, 125.5, 118.7, 114.4, 55.3, 43.3, 35.9, 33.6; HRMS (ESI-TOF)  $m/z$ :  $[\text{M} + \text{Na}]^+$  Calcd for  $\text{C}_{24}\text{H}_{19}\text{NO}_2\text{Na}^+$  376.1308; Found 376.1308.

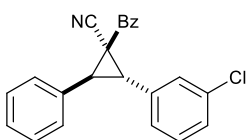

**Synthesis of 3v:** A mixture of benzyl bromide **1a** (20.4 mg, 0.119 mmol, 1.2 equiv), (*E*)-2-benzoyl-3-(3-chlorophenyl)acrylonitrile **2f** (26.8 mg, 0.100 mmol, 1.0 equiv), cesium carbonate (48.9 mg, 0.150 mmol, 1.5 equiv), **C2** (3.2 mg, 10 mol%) and 4 Å MS (40.0 mg) in distilled toluene (1.0 mL) was stirred at 60 °C for 20 h, and the reaction was monitored by TLC. After completion, the mixture was directly purified by flash chromatography on silica gel (EtOAc/petroleum ether = 1/40 to 1/30) to give the product **3v**: 24.2 mg (0.0678 mmol), as a white solid, 68% yield; mp = 138–140 °C;  $^1\text{H}$  NMR (400 MHz,  $\text{CDCl}_3$ ):  $\delta$  (ppm) 7.96–7.84 (m, 2H), 7.59–7.52 (m, 1H), 7.49–7.41 (m, 3H), 7.38–7.29 (m, 5H), 7.28–7.19 (m, 3H), 4.29 (d,  $J = 8.8$  Hz, 1H), 3.91 (d,  $J = 8.8$  Hz, 1H);  $^{13}\text{C}$  NMR (100 MHz,  $\text{CDCl}_3$ ):  $\delta$  (ppm) 187.9, 135.7, 135.5, 134.8, 133.9, 131.0, 130.2, 129.1, 129.0, 128.8, 128.73 (2C), 128.71, 128.66, 126.8, 118.2, 42.8, 35.7, 33.0; HRMS (ESI-TOF)  $m/z$ :  $[\text{M} + \text{H}]^+$  Calcd for  $\text{C}_{23}\text{H}_{17}^{35}\text{ClNO}^+$  358.0993; Found 358.0997; Calcd for  $\text{C}_{23}\text{H}_{17}^{37}\text{ClNO}^+$  360.0964; Found 360.0960.

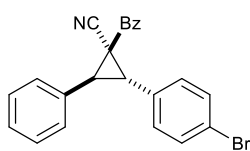

**Synthesis of 3w:** A mixture of benzyl bromide **1a** (20.4 mg, 0.119 mmol, 1.2 equiv), (*E*)-2-benzoyl-3-(4-bromophenyl)acrylonitrile **2g** (31.2 mg, 0.0999 mmol, 1.0 equiv), cesium carbonate (48.9 mg, 0.150 mmol, 1.5 equiv), **C2**

(3.2 mg, 10 mol%) and 4 Å MS (40.0 mg) in distilled toluene (1.0 mL) was stirred at 60 °C for 30 h, and the reaction was monitored by TLC. After completion, the mixture was directly purified by flash chromatography on silica gel (EtOAc/petroleum ether = 1/50 to 1/40) to give the product **3w**: 34.3 mg (0.0855 mmol), as a white solid, 86% yield; mp = 123–125 °C; <sup>1</sup>H NMR (400 MHz, CDCl<sub>3</sub>): δ (ppm) 7.96–7.80 (m, 2H), 7.60–7.49 (m, 3H), 7.47–7.39 (m, 2H), 7.36–7.19 (m, 7H), 4.26 (d, *J* = 8.8 Hz, 1H), 3.89 (d, *J* = 8.8 Hz, 1H); <sup>13</sup>C NMR (100 MHz, CDCl<sub>3</sub>): δ (ppm) 187.9, 135.6, 133.9, 132.7, 132.1, 131.0, 130.3, 129.1, 128.8, 128.72 (2C), 128.66, 122.6, 118.3, 42.9, 35.7, 33.0; HRMS (ESI-TOF) *m/z*: [M + Na]<sup>+</sup> Calcd for C<sub>23</sub>H<sub>16</sub><sup>79</sup>BrNONa<sup>+</sup> 424.0307; Found 424.0314; Calcd for C<sub>23</sub>H<sub>16</sub><sup>81</sup>BrNONa<sup>+</sup> 426.0287; Found 426.0284.

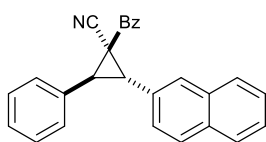

**Synthesis of 3x:** A mixture of benzyl bromide **1a** (20.4 mg, 0.119 mmol, 1.2 equiv), (*E*)-2-benzoyl-3-(naphthalen-2-yl)acrylonitrile **2h** (28.3 mg, 0.0999 mmol, 1.0 equiv), cesium carbonate (48.9 mg, 0.150 mmol, 1.5 equiv), **C2**

(3.2 mg, 10 mol%) and 4 Å MS (40.0 mg) in distilled toluene (1.0 mL) was stirred at 60 °C for 20 h, and the reaction was monitored by TLC. After completion, the mixture was directly purified by flash chromatography on silica gel (EtOAc/petroleum ether = 1/40 to 1/30) to give the product **3x**: 26.6 mg (0.0713 mmol), as a white solid, 71% yield; mp = 201–203 °C; <sup>1</sup>H NMR (400 MHz, CDCl<sub>3</sub>): δ (ppm) 8.16 (d, *J* = 8.0 Hz, 1H), 8.05–7.96 (m, 2H), 7.95–7.87 (m, 2H), 7.64–7.37 (m, 9H), 7.32–7.21 (m, 3H), 4.72 (d, *J* = 8.8 Hz, 1H), 4.14 (d, *J* = 8.8 Hz, 1H); <sup>13</sup>C NMR (100 MHz, CDCl<sub>3</sub>): δ (ppm) 188.5, 135.5, 134.0, 133.8, 132.8, 131.5, 130.2, 129.5, 129.3, 128.92, 128.86, 128.8, 128.68, 128.65, 127.2, 126.4, 125.8, 125.2, 123.5, 118.4, 42.7, 35.5, 31.7; HRMS (ESI-TOF) *m/z*: [M + H]<sup>+</sup> Calcd for C<sub>27</sub>H<sub>20</sub>NO<sup>+</sup> 374.1539; Found 374.1539.

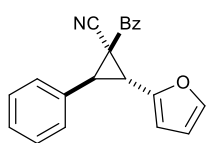

**Synthesis of 3y:** A mixture of benzyl bromide **1a** (20.4 mg, 0.119 mmol, 1.2 equiv), (*E*)-2-benzoyl-3-(furan-2-yl)acrylonitrile **2i** (22.3 mg, 0.0999 mmol, 1.0 equiv), cesium carbonate (48.9 mg, 0.150 mmol, 1.5 equiv), **C2** (3.2 mg, 10 mol%) and 4 Å MS (40.0 mg) in distilled toluene (1.0 mL) was stirred at 60 °C for 40 h, and the reaction was monitored by TLC. After completion, the mixture was directly purified by flash chromatography on silica gel (EtOAc/petroleum ether = 1/40 to 1/30) to give the product **3y**: 18.1

mg (0.0578 mmol), as a yellow solid, 58% yield; mp = 128–130 °C; <sup>1</sup>H NMR (400 MHz, CDCl<sub>3</sub>): δ (ppm) 7.93–7.87 (m, 2H), 7.58–7.52 (m, 1H), 7.48–7.40 (m, 3H), 7.32–7.18 (m, 5H), 6.50 (d, *J* = 3.6 Hz, 1H), 6.43 (dd, *J* = 3.2, 1.6 Hz, 1H), 4.26 (d, *J* = 8.8 Hz, 1H), 4.00 (d, *J* = 8.8 Hz, 1H); <sup>13</sup>C NMR (100 MHz, CDCl<sub>3</sub>): δ (ppm) 187.7, 147.8, 143.2, 135.6, 133.8, 130.7, 129.0, 128.8, 128.7 (2C), 128.6, 118.4, 111.0, 109.3, 42.2, 35.0, 27.7; HRMS (ESI-TOF) *m/z*: [M + Na]<sup>+</sup> Calcd for C<sub>21</sub>H<sub>15</sub>NO<sub>2</sub>Na<sup>+</sup> 336.0995; Found 336.1003.

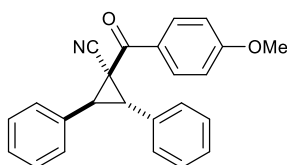

**Synthesis of 3z:** A mixture of benzyl bromide **1a** (20.4 mg, 0.119 mmol, 1.2 equiv), (*E*)-2-(4-methoxybenzoyl)-3-phenylacrylonitrile **2j** (26.3 mg, 0.0999 mmol, 1.0 equiv), cesium carbonate (48.9 mg, 0.150 mmol, 1.5 equiv), **C2** (3.2 mg, 10 mol%) and 4 Å MS (40.0 mg) in distilled toluene

(1.0 mL) was stirred at 60 °C for 20 h, and the reaction was monitored by TLC. After completion, the mixture was directly purified by flash chromatography on silica gel (EtOAc/petroleum ether = 1/40 to 1/30) to give the product **3z**: 34.7 mg (0.0983 mmol), as a white solid, 98% yield; mp = 116–118 °C; <sup>1</sup>H NMR (400 MHz, CDCl<sub>3</sub>): δ (ppm) 7.98–7.92 (m, 2H), 7.49–7.40 (m, 4H), 7.39–7.34 (m, 1H), 7.32–7.27 (m, 2H), 7.26–7.16 (m, 3H), 6.92–6.86 (m, 2H), 4.29 (d, *J* = 8.8 Hz, 1H), 3.87 (d, *J* = 8.8 Hz, 1H), 3.83 (s, 3H); <sup>13</sup>C NMR (100 MHz, CDCl<sub>3</sub>): δ (ppm) 186.2, 164.1, 133.8, 131.7, 131.6, 128.9, 128.7, 128.64, 128.61, 128.5, 128.4, 128.3, 118.8, 113.9, 55.5, 42.2, 35.4, 33.2; HRMS (ESI-TOF) *m/z*: [M + Na]<sup>+</sup> Calcd for C<sub>24</sub>H<sub>19</sub>NO<sub>2</sub>Na<sup>+</sup> 376.1308; Found 376.1313.

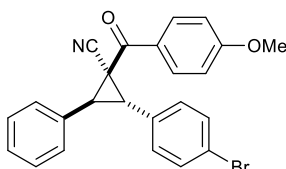

**Synthesis of 3aa:** A mixture of benzyl bromide **1a** (20.4 mg, 0.119 mmol, 1.2 equiv), (*E*)-3-(4-bromophenyl)-2-(4-methoxybenzoyl)acrylonitrile **2k** (34.2 mg, 0.0999 mmol, 1.0 equiv), cesium carbonate (48.9 mg, 0.150 mmol, 1.5 equiv), **C2** (3.2 mg, 10 mol%) and 4 Å MS (40.0 mg) in distilled toluene (1.0 mL) was

stirred at 60 °C for 20 h, and the reaction was monitored by TLC. After completion, the mixture was directly purified by flash chromatography on silica gel (EtOAc/petroleum ether = 1/50 to 1/40) to give the product **3aa**: 36.3 mg (0.0842 mmol), as a white solid, 84% yield; mp = 139–141 °C; <sup>1</sup>H NMR (400 MHz, CDCl<sub>3</sub>): δ (ppm) 7.93 (d, *J* = 8.8 Hz, 2H), 7.55 (d, *J* = 8.4 Hz, 2H), 7.33 (d, *J* = 8.4 Hz, 2H), 7.29–7.19 (m, 5H), 6.89 (d, *J* = 8.8 Hz, 2H), 4.22 (d, *J* = 8.8 Hz, 1H), 3.83 (s, 3H), 3.81 (d, *J* = 8.8 Hz, 1H); <sup>13</sup>C NMR (100 MHz, CDCl<sub>3</sub>): δ (ppm) 185.8, 164.2, 133.0, 132.1, 131.6, 131.3, 130.3, 128.67, 128.66, 128.6, 128.3, 122.5, 118.6, 113.9, 55.6, 42.1, 35.3, 32.5; HRMS (ESI-

TOF)  $m/z$ :  $[M + Na]^+$  Calcd for  $C_{24}H_{18}^{79}BrNO_2Na^+$  454.0413; Found 454.0421; Calcd for  $C_{24}H_{18}^{81}BrNO_2Na^+$  456.0393; Found 456.0403.

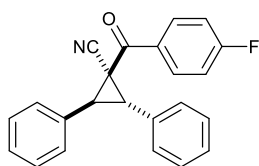

**Synthesis of 3ab:** A mixture of benzyl bromide **1a** (20.4 mg, 0.119 mmol, 1.2 equiv), (*E*)-2-(4-fluorobenzoyl)-3-phenylacrylonitrile **2l** (25.1 mg, 0.0999 mmol, 1.0 equiv), cesium carbonate (48.9 mg, 0.150 mmol, 1.5 equiv), **C2** (3.2 mg, 10 mol%) and 4 Å MS (40.0 mg) in distilled toluene (1.0

mL) was stirred at 60 °C for 20 h, and the reaction was monitored by TLC. After completion, the mixture was directly purified by flash chromatography on silica gel (EtOAc/petroleum ether = 1/50 to 1/40) to give the product **3ab**: 27.3 mg (0.0800 mmol), as a white solid, 80% yield; mp = 110–112 °C;  $^1H$  NMR (400 MHz,  $CDCl_3$ ):  $\delta$  (ppm) 7.95–7.74 (m, 2H), 7.42–7.26 (m, 5H), 7.25–7.11 (m, 5H), 7.06–6.95 (m, 2H), 4.24 (d,  $J = 8.8$  Hz, 1H), 3.86 (d,  $J = 8.8$  Hz, 1H);  $^{13}C$  NMR (100 MHz,  $CDCl_3$ ):  $\delta$  (ppm) 186.7, 166.0 (d,  $^1J_{FC} = 255.1$  Hz), 133.5, 132.0 (d,  $^4J_{FC} = 3.0$  Hz), 131.8 (d,  $^3J_{FC} = 9.5$  Hz), 131.3, 129.0, 128.8, 128.71, 128.67, 128.6, 128.5, 118.4, 115.9 (d,  $^2J_{FC} = 22.0$  Hz), 42.9, 35.6, 33.7;  $^{19}F$  NMR (376 MHz,  $CDCl_3$ )  $\delta$  (ppm) –103.1 (m); HRMS (ESI-TOF)  $m/z$ :  $[M + Na]^+$  Calcd for  $C_{23}H_{16}FNONa^+$  364.1108; Found 364.1109.

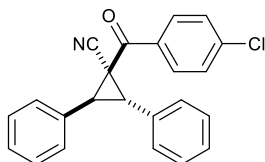

**Synthesis of 3ac:** A mixture of benzyl bromide **1a** (20.4 mg, 0.119 mmol, 1.2 equiv), (*E*)-2-(4-chlorobenzoyl)-3-phenylacrylonitrile **2m** (26.8 mg, 0.100 mmol, 1.0 equiv), cesium carbonate (48.9 mg, 0.150 mmol, 1.5 equiv),

**C2** (3.2 mg, 10 mol%) and 4 Å MS (40.0 mg) in distilled toluene (1.0 mL) was stirred at 60 °C for 20 h, and the reaction was monitored by TLC. After completion, the mixture was directly purified by flash chromatography on silica gel (EtOAc/petroleum ether = 1/40 to 1/30) to give the product **3ac**: 25.9 mg (0.0725 mmol), as a white solid, 73% yield; mp = 134–136 °C;  $^1H$  NMR (400 MHz,  $CDCl_3$ ):  $\delta$  (ppm) 8.00–7.75 (m, 2H), 7.54–7.13 (m, 12H), 4.32 (d,  $J = 8.8$  Hz, 1H), 3.95 (d,  $J = 8.8$  Hz, 1H);  $^{13}C$  NMR (100 MHz,  $CDCl_3$ ):  $\delta$  (ppm) 187.1, 140.4, 134.0, 133.4, 131.2, 130.4, 129.03, 128.98, 128.8, 128.73, 128.71, 128.6, 128.5, 118.3, 43.1, 35.7, 33.8; HRMS (ESI-TOF)  $m/z$ :  $[M + H]^+$  Calcd for  $C_{23}H_{17}^{35}ClNO^+$  358.0993; Found 358.0986; Calcd for  $C_{23}H_{17}^{37}ClNO^+$  360.0964; Found 360.0967;  $[M + Na]^+$  Calcd for  $C_{23}H_{16}^{35}ClNONa^+$  380.0813; Found 380.0805; Calcd for  $C_{23}H_{16}^{37}ClNONa^+$  382.0783; Found 382.0787.

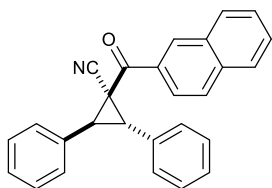

**Synthesis of 3ad:** A mixture of benzyl bromide **1a** (20.4 mg, 0.119 mmol, 1.2 equiv), (*E*)-2-(1-naphthoyl)-3-phenylacrylonitrile **2n** (28.3 mg, 0.0999 mmol, 1.0 equiv), cesium carbonate (48.9 mg, 0.150 mmol, 1.5 equiv), **C2** (3.2 mg, 10 mol%) and 4 Å MS (40.0 mg) in distilled toluene (1.0 mL) was

stirred at 60 °C for 30 h, and the reaction was monitored by TLC. After completion, the mixture was directly purified by flash chromatography on silica gel (EtOAc/petroleum ether = 1/50 to 1/40) to give the product **3ad**: 33.0 mg (0.0884 mmol), as a white solid, 88% yield; mp = 127–129 °C; <sup>1</sup>H NMR (400 MHz, CDCl<sub>3</sub>): δ (ppm) 8.19 (d, *J* = 8.4 Hz, 1H), 8.06–7.89 (m, 2H), 7.87–7.74 (m, 1H), 7.61–7.20 (m, 13H), 4.46 (d, *J* = 9.2 Hz, 1H), 4.05 (d, *J* = 9.2 Hz, 1H); <sup>13</sup>C NMR (100 MHz, CDCl<sub>3</sub>): δ (ppm) 189.9, 133.9, 133.62, 133.57, 133.5, 131.4, 130.2, 129.2, 129.0, 128.8, 128.71, 128.68, 128.64, 128.57, 128.1, 126.7, 125.3, 125.1, 124.2, 118.5, 44.8, 38.2, 35.6; HRMS (ESI-TOF) *m/z*: [M + Na]<sup>+</sup> Calcd for C<sub>27</sub>H<sub>19</sub>NONa<sup>+</sup> 396.1359; Found 396.1357.

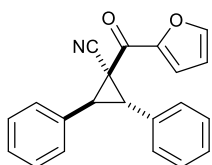

**Synthesis of 3ae:** A mixture of benzyl bromide **1a** (20.4 mg, 0.119 mmol, 1.2 equiv), (*E*)-2-(furan-2-carbonyl)-3-phenylacrylonitrile **2o** (22.3 mg, 0.0999 mmol, 1.0 equiv), cesium carbonate (48.9 mg, 0.150 mmol, 1.5 equiv), **C2** (3.2 mg, 10 mol%) and 4 Å MS (40.0 mg) in distilled toluene (1.0 mL) was

stirred at 60 °C for 20 h, and the reaction was monitored by TLC. After completion, the mixture was directly purified by flash chromatography on silica gel (EtOAc/petroleum ether = 1/50 to 1/40) to give the product **3ae**: 28.5 mg (0.0910 mmol), as a white solid, 91% yield; mp = 135–137 °C; <sup>1</sup>H NMR (400 MHz, CDCl<sub>3</sub>): δ (ppm) 7.66–7.61 (m, 1H), 7.58–7.53 (m, 1H), 7.47–7.36 (m, 5H), 7.28–7.22 (m, 5H), 6.54 (dd, *J* = 3.6, 2.4 Hz, 1H), 4.27 (d, *J* = 8.8 Hz, 1H), 3.89 (d, *J* = 8.8 Hz, 1H); <sup>13</sup>C NMR (100 MHz, CDCl<sub>3</sub>): δ (ppm) 174.9, 151.0, 147.8, 133.4, 131.3, 129.1, 128.9, 128.7, 128.6, 128.5, 120.6, 118.3, 112.6, 42.8, 34.3, 34.1; HRMS (ESI-TOF) *m/z*: [M + Na]<sup>+</sup> Calcd for C<sub>21</sub>H<sub>15</sub>NO<sub>2</sub>Na<sup>+</sup> 336.0995; Found 336.1000.

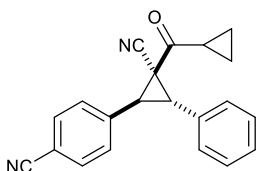

**Synthesis of 3af:** A mixture of 4-(bromomethyl)benzotrile **1a** (23.5 mg, 0.119 mmol, 1.2 equiv), (*E*)-2-(cyclopropanecarbonyl)-3-phenylacrylonitrile **2p** (19.7 mg, 0.0999 mmol, 1.0 equiv), cesium carbonate (48.9 mg, 0.150 mmol, 1.5 equiv), **C2** (3.2 mg, 10 mol%) and 4 Å MS (40.0 mg) in distilled toluene (1.0 mL) was

stirred at 80 °C for 40 h, and the reaction was monitored by TLC. After completion, the mixture was directly purified by flash chromatography on silica gel (EtOAc/petroleum ether = 1/40 to 1/30)

to give the product **3af**: 28.3 mg (0.0907 mmol), as a white solid, 91% yield; mp = 109–111 °C; <sup>1</sup>H NMR (400 MHz, CDCl<sub>3</sub>): δ (ppm) 7.62 (d, *J* = 8.4 Hz, 2H), 7.47–7.35 (m, 7H), 3.98 (d, *J* = 8.8 Hz, 1H), 3.79 (d, *J* = 8.8 Hz, 1H), 2.69–2.61 (m, 1H), 1.14–1.03 (m, 2H), 0.97–0.88 (m, 1H), 0.68–0.60 (m, 1H); <sup>13</sup>C NMR (100 MHz, CDCl<sub>3</sub>): δ (ppm) 196.6, 137.5, 132.8, 132.2, 130.2, 129.1, 128.8, 128.3, 118.3, 118.1, 112.3, 42.4, 37.6, 36.5, 20.5, 13.3, 12.7; HRMS (ESI-TOF) *m/z*: [M + Na]<sup>+</sup> Calcd for C<sub>21</sub>H<sub>16</sub>N<sub>2</sub>ONa<sup>+</sup> 335.1155; Found 335.1154.

### 3.2 Procedure for synthesis of **5**

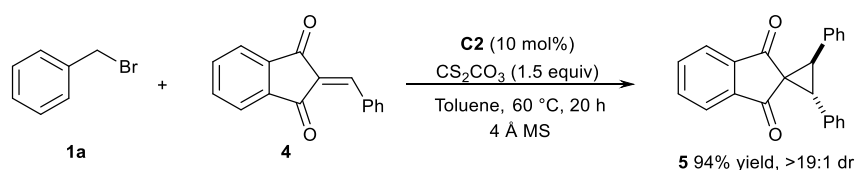

A mixture of benzyl bromide **1a** (20.4 mg, 0.119 mmol, 1.2 equiv), 2-benzylidene-1*H*-indene-1,3(2*H*)-dione **4** (23.4 mg, 0.0999 mmol, 1.0 equiv), cesium carbonate (48.9 mg, 0.150 mmol, 1.5 equiv), **C2** (3.2 mg, 10 mol%) and 4 Å MS (40.0 mg) in distilled toluene (1.0 mL) was stirred at 60 °C for 20 h, and the reaction was monitored by TLC. After completion, the mixture was directly purified by flash chromatography on silica gel (EtOAc/petroleum ether = 1/40 to 1/30) to give the product **5**: 30.3 mg (0.0935 mmol), as a yellow solid, 94% yield; mp = 176–178 °C; <sup>1</sup>H NMR (400 MHz, CDCl<sub>3</sub>): δ (ppm) 7.84 (dd, *J* = 5.6, 3.2 Hz, 2H), 7.74 (dd, *J* = 5.6, 3.2 Hz, 2H), 7.46–7.26 (m, 10H), 4.19 (s, 2H); <sup>13</sup>C NMR (100 MHz, CDCl<sub>3</sub>): δ (ppm) 195.6, 142.1, 134.8, 133.8, 129.3, 128.4, 127.9, 122.6, 48.5, 43.6; HRMS (ESI-TOF) *m/z*: [M + Na]<sup>+</sup> Calcd for C<sub>23</sub>H<sub>16</sub>O<sub>2</sub>Na<sup>+</sup> 347.1043; Found 347.1047.

### 3.3 Procedure for synthesis of **7**

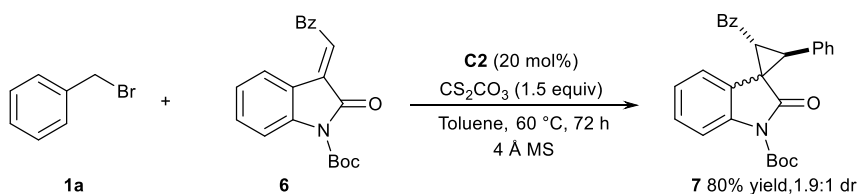

A mixture of benzyl bromide **1a** (28.9 mg, 0.169 mmol, 1.7 equiv), *tert*-butyl (*Z*)-2-oxo-3-(2-oxo-2-phenylethylidene)indoline-1-carboxylate **6** (34.9 mg, 0.0999 mmol, 1.0 equiv), cesium carbonate (48.9 mg, 0.150 mmol, 1.5 equiv), **C2** (6.4 mg, 20 mol%) and 4 Å MS (40.0 mg) in distilled toluene (1.0 mL) was stirred at 60 °C for 72 h, and the reaction was monitored by TLC.

After completion, the mixture was directly purified by flash chromatography on silica gel (EtOAc/petroleum ether = 1/40 to 1/30) to give separable diastereomers **7a** and **7b** in 80% total yield.

**7a**: 22.8 mg (0.0519 mmol), as a white solid, 52% yield, mp = 127–129 °C; <sup>1</sup>H NMR (400 MHz, CDCl<sub>3</sub>): δ (ppm) 8.01–7.95 (m, 2H), 7.81 (d, *J* = 8.4 Hz, 1H), 7.59–7.54 (m, 1H), 7.45 (t, *J* = 8.0 Hz, 2H), 7.37–7.22 (m, 7H), 7.10 (td, *J* = 7.6, 1.2 Hz, 1H), 4.34 (d, *J* = 8.8 Hz, 1H), 4.11 (d, *J* = 8.8 Hz, 1H), 1.61 (s, 9H); <sup>13</sup>C NMR (100 MHz, CDCl<sub>3</sub>): δ (ppm) 192.5, 170.2, 149.0, 139.7, 136.8, 133.9, 132.5, 129.3, 128.9, 128.6, 128.2, 127.8, 127.7, 125.2, 124.4, 121.7, 114.7, 84.6, 42.3, 42.1, 41.6, 28.1; HRMS (ESI-TOF) *m/z*: [M + Na]<sup>+</sup> Calcd for C<sub>28</sub>H<sub>25</sub>NO<sub>4</sub>Na<sup>+</sup> 462.1676; Found 462.1676.

**7b**: 12.2 mg (0.0278 mmol), as a white solid, 28% yield; mp = 149–151 °C; <sup>1</sup>H NMR (400 MHz, CDCl<sub>3</sub>): δ (ppm) 7.93 (d, *J* = 8.4 Hz, 1H), 7.87–7.79 (m, 2H), 7.57–7.50 (m, 1H), 7.42–7.36 (m, 2H), 7.35–7.26 (m, 4H), 7.25–7.21 (m, 2H), 6.88 (td, *J* = 7.6, 1.0 Hz, 1H), 6.14 (dd, *J* = 7.6, 1.2 Hz, 1H), 4.19 (d, *J* = 8.8 Hz, 1H), 3.63 (d, *J* = 8.8 Hz, 1H), 1.56 (s, 9H); <sup>13</sup>C NMR (100 MHz, CDCl<sub>3</sub>): δ (ppm) 191.0, 170.7, 149.2, 140.2, 136.4, 133.5, 133.0, 129.9, 128.8, 128.7, 128.4, 128.04, 127.98, 124.4, 123.9, 120.7, 115.0, 84.5, 42.8, 39.9, 39.6, 28.0; HRMS (ESI-TOF) *m/z*: [M + Na]<sup>+</sup> Calcd for C<sub>28</sub>H<sub>25</sub>NO<sub>4</sub>Na<sup>+</sup> 462.1676; Found 462.1682.

#### 4. Asymmetric intermolecular cyclopropanation exploration

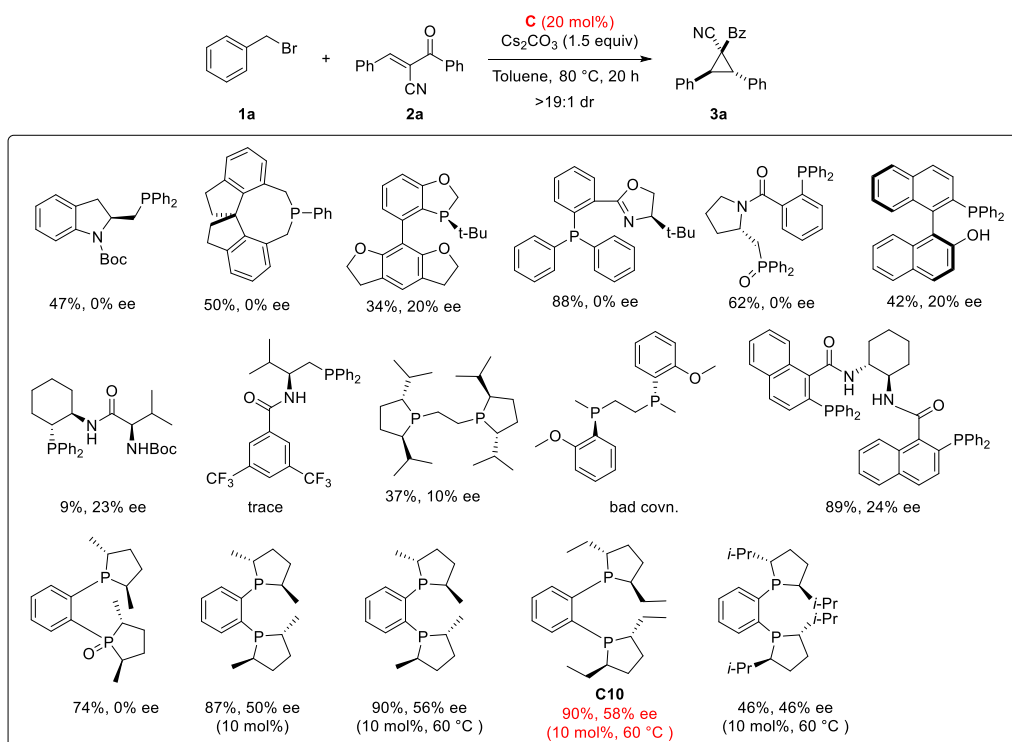



**Asymmetric synthesis of 3a:** A mixture of benzyl bromide **1a** (20.4 mg, 0.119 mmol, 1.2 equiv), (*E*)-2-benzoyl-3-phenylacrylonitrile **2a** (23.3 mg, 0.0999 mmol, 1.0 equiv), cesium carbonate (48.9 mg, 0.150 mmol, 1.5 equiv) and (*R,R*)-Et-DuPhos **C10** (3.6 mg, 9.9 mol%) in distilled toluene (1.0 mL) was stirred at 60 °C for 20 h, and the reaction was monitored by TLC. After completion, the mixture was directly purified by flash chromatography on silica gel (EtOAc/petroleum ether = 1/40 to 1/30) to give the product **3a**: 29.1 mg (0.0900 mmol), as a white solid, 90% yield; 58% ee, determined by HPLC analysis (Daicel chiralpak IA-H, *n*-hexane/*i*-PrOH = 80/20, flow rate = 1.0 mL/min,  $\lambda = 254$  nm)  $t_R = 7.22$  min (major),  $t_R = 8.12$  min (minor).

## 5. Transformations of product 3a

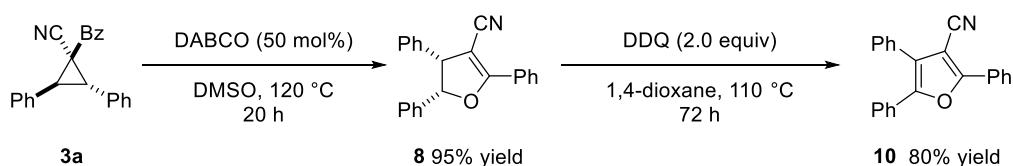

**Synthesis of 8:** A solution of **3a** (32.3 mg, 0.0999 mmol, 1.0 equiv) and DABCO (5.6 mg, 0.0499 mmol, 0.5 equiv) in DMSO (1.0 mL) was stirred at 120 °C for 20 h, and the reaction was monitored by TLC. After completion, the mixture was quenched with water (5 mL) and extracted with EtOAc (5 mL x 3), the organic layer was combined, dried with anhydrous Na<sub>2</sub>SO<sub>4</sub>, filtered and concentrated *in vacuo*. The residue was purified by flash chromatography on silica gel (EtOAc/petroleum ether = 1/60 to 1/50) to give product **8**: 30.7 mg (0.0950 mmol), as a colorless oil, 95% yield; <sup>1</sup>H NMR (400 MHz, CDCl<sub>3</sub>):  $\delta$  (ppm) 8.21–8.06 (m, 2H), 7.57–7.47 (m, 3H), 7.46–7.26 (m, 10H), 5.63 (d,  $J = 7.6$  Hz, 1H), 4.42 (d,  $J = 7.6$  Hz, 1H); <sup>13</sup>C NMR (151 MHz, CDCl<sub>3</sub>):  $\delta$  (ppm) 166.7, 139.8, 139.7, 131.8, 129.3, 129.0, 128.85, 128.83, 128.2, 127.7, 127.6, 127.4, 125.4, 117.0, 92.1, 84.4, 59.1; HRMS (ESI-TOF)  $m/z$ : [M + Na]<sup>+</sup> Calcd for C<sub>23</sub>H<sub>17</sub>NONa<sup>+</sup> 346.1202; Found 346.1206. *The relative configuration has been assigned by NOE analysis.*

**Synthesis of 10:** A mixture of **8** (36.0 mg, 0.111 mmol, 1.0 equiv) and DDQ (50.6 mg, 0.223 mmol, 2.0 equiv) in 1,4-dioxane (3.0 mL) was stirred at 110 °C for 72 h, and the reaction was monitored by TLC. After completion, the solvent was evaporated and the residue was purified by flash chromatography on silica gel (EtOAc/petroleum ether = 1/90 to 1/70) to give the product **10**: 28.6 mg (0.0891 mmol), as a white solid, 80% yield; mp = 158–160 °C; <sup>1</sup>H NMR (400 MHz, CDCl<sub>3</sub>):  $\delta$  (ppm) 8.16–8.06 (m, 2H), 7.60–7.39 (m, 10H), 7.36–7.27 (m, 3H); <sup>13</sup>C NMR (100 MHz, CDCl<sub>3</sub>):  $\delta$

(ppm) 158.4, 148.6, 130.3, 130.2, 129.3, 129.2 (2C), 129.1 (2C), 128.73, 128.67, 128.1, 126.3, 125.5, 124.1, 114.7, 95.7; HRMS (ESI-TOF)  $m/z$ :  $[M + Na]^+$  Calcd for  $C_{23}H_{15}NONa^+$  344.1046; Found 344.1055.

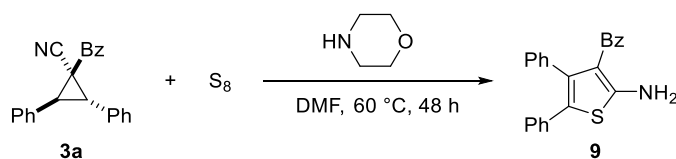

**Synthesis of 9:** A solution of **3a** (32.3 mg, 0.100 mmol, 1.0 equiv),  $S_8$  (38.5 mg, 0.150 mmol, 1.5 equiv) and morpholine (8.7 mg, 0.0999 mmol, 1.0 equiv) in DMF (1.0 mL) was stirred at 60 °C for 48 h, and the reaction was monitored by TLC. After completion, the solution was washed by water (5 mL) and extracted with EtOAc (5 mL x 3), the organic layer was combined, dried with anhydrous  $Na_2SO_4$ , filtered and concentrated *in vacuo*. The residue was purified by flash chromatography on silica gel (EtOAc/petroleum ether = 1/20 to 1/15) to give the product **9**: 24.0 mg (0.0676 mmol), as a yellow solid, 68% yield; mp = 154–156 °C;  $^1H$  NMR (400 MHz,  $CDCl_3$ ):  $\delta$  (ppm) 7.27–7.23 (m, 2H), 7.19–7.10 (m, 3H), 7.10–6.99 (m, 3H), 6.98–6.91 (m, 2H), 6.90–6.79 (m, 5H), 6.57 (s, 2H);  $^{13}C$  NMR (100 MHz,  $CDCl_3$ ):  $\delta$  (ppm) 193.9, 164.3, 140.1, 136.1, 135.9, 134.0, 130.7, 130.2, 129.3, 128.6, 128.2, 127.6, 127.2, 126.8, 126.5, 120.8, 117.8; HRMS (ESI-TOF)  $m/z$ :  $[M + Na]^+$  Calcd for  $C_{23}H_{17}NOSNa^+$  378.0923; Found 378.0921.

## 6. More substrate exploration

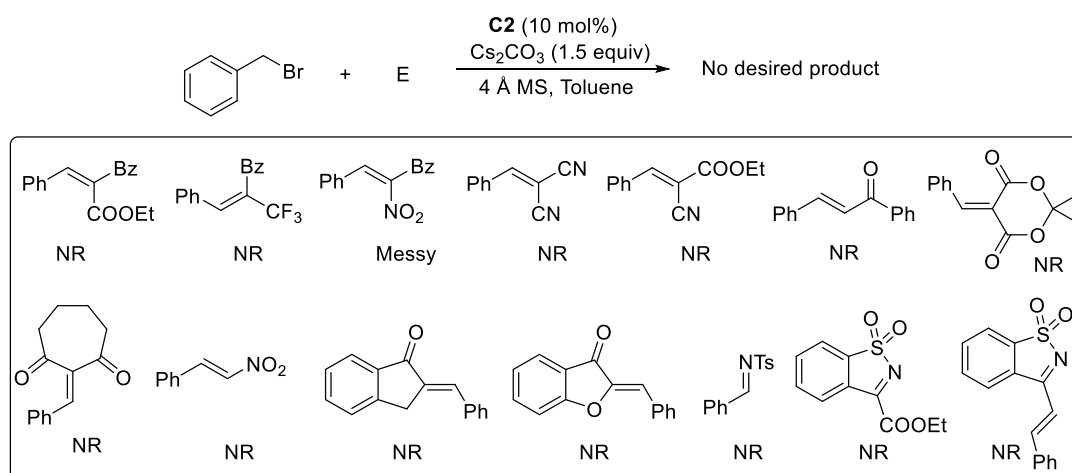

To further expand the substrate scope, other kinds of activated alkenes and imines were tested. Unfortunately, generally no obvious conversions were observed under standard conditions.

## 7. Crystal data and structural refinement

**Procedure for the recrystallization of 3v:** To a 10 mL tube containing **3v** (30 mg) were added isopropanol (5.0 mL) and *n*-hexane (5.0 mL). The mixture was heated until a clear solution was formed, which was kept aside and sealed by a piece of weighing paper with a tiny hole at room temperature to obtain crystals. The crystals were subjected for single crystal XRD to determine the absolute configuration of **3v**. The data were collected by an Agilent Gemini equipped with a Mo radiation source ( $K\alpha = 0.71073 \text{ \AA}$ ) at 150.15 K. CCDC 2178229 (**3v**) contains the supplementary crystallographic data for this paper. These data can be obtained free of charge via [www.ccdc.cam.ac.uk/data\\_request/cif](http://www.ccdc.cam.ac.uk/data_request/cif).

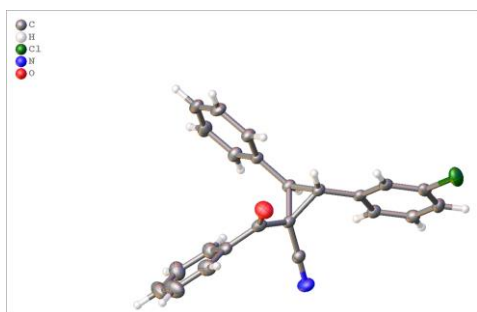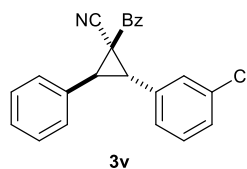

|                        |                    |
|------------------------|--------------------|
| Identification code    | <b>3v</b>          |
| Empirical formula      | $C_{23}H_{16}ClNO$ |
| Formula weight         | 357.82             |
| Temperature/K          | 150.15             |
| Crystal system         | monoclinic         |
| Space group            | $I2/c$             |
| $a/\text{\AA}$         | 17.725(3)          |
| $b/\text{\AA}$         | 6.1239(8)          |
| $c/\text{\AA}$         | 33.492(6)          |
| $\alpha/^\circ$        | 90                 |
| $\beta/^\circ$         | 93.999(9)          |
| $\gamma/^\circ$        | 90                 |
| Volume/ $\text{\AA}^3$ | 3626.6(10)         |
| Z                      | 8                  |

|                                                |                                                               |
|------------------------------------------------|---------------------------------------------------------------|
| $\rho_{\text{calc}}/\text{cm}^3$               | 1.311                                                         |
| $\mu/\text{mm}^{-1}$                           | 0.222                                                         |
| F(000)                                         | 1488.0                                                        |
| Crystal size/ $\text{mm}^3$                    | $0.35 \times 0.21 \times 0.17$                                |
| Radiation                                      | MoK $\alpha$ ( $\lambda = 0.71073$ )                          |
| 2 $\Theta$ range for data collection/ $^\circ$ | 4.608 to 55.026                                               |
| Index ranges                                   | $-23 \leq h \leq 23, -7 \leq k \leq 7, -43 \leq l \leq 43$    |
| Reflections collected                          | 31596                                                         |
| Independent reflections                        | 4147 [ $R_{\text{int}} = 0.1463, R_{\text{sigma}} = 0.0940$ ] |
| Data/restraints/parameters                     | 4147/0/235                                                    |
| Goodness-of-fit on $F^2$                       | 1.033                                                         |
| Final R indexes [ $I \geq 2\sigma(I)$ ]        | $R_1 = 0.0762, wR_2 = 0.1841$                                 |
| Final R indexes [all data]                     | $R_1 = 0.0957, wR_2 = 0.2005$                                 |
| Largest diff. peak/hole / $e \text{ \AA}^{-3}$ | 0.92/-0.70                                                    |

## 8. NMR, HRMS spectra and HPLC chromatograms

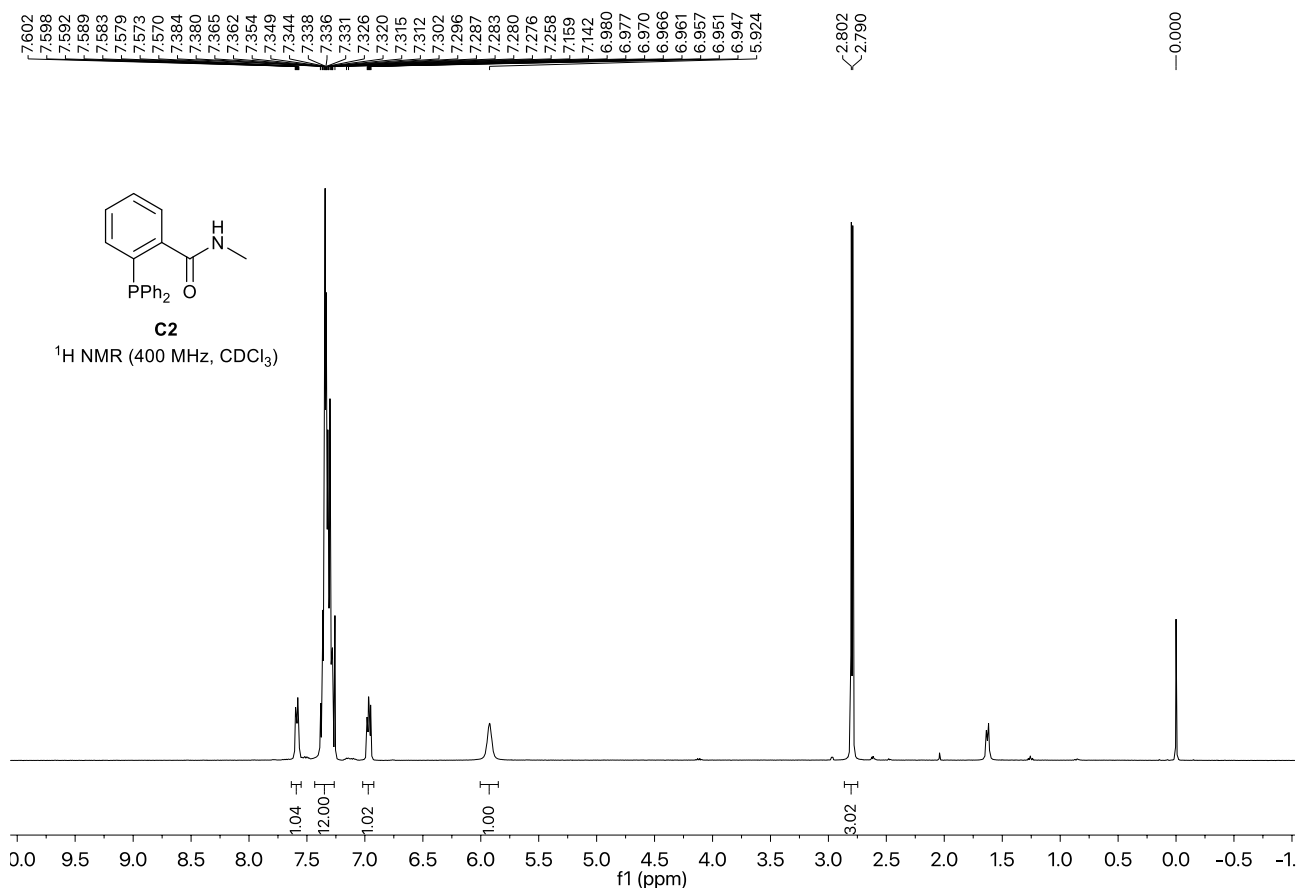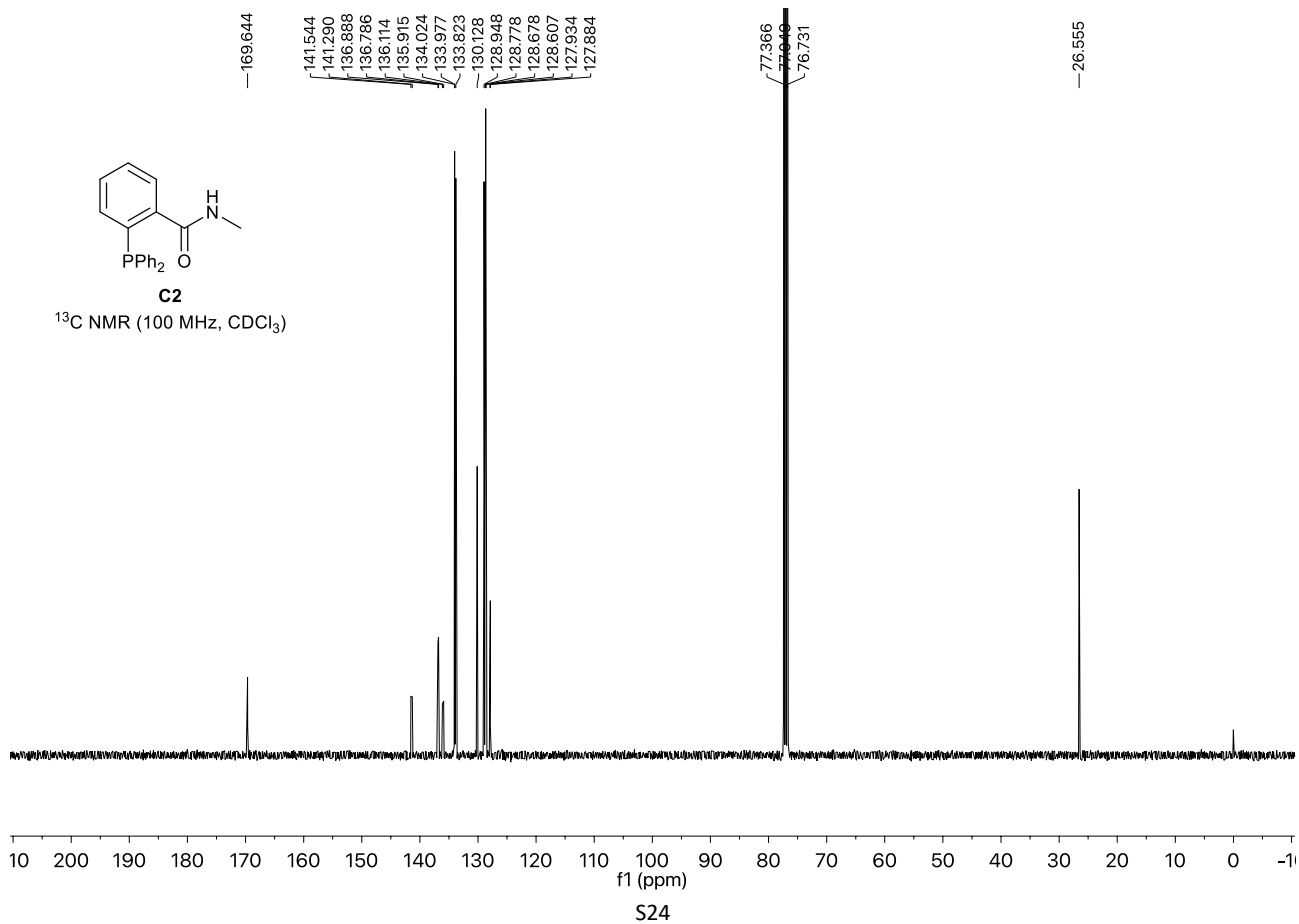

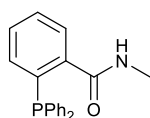

**C2**

$^{31}\text{P}$  NMR (162 MHz,  $\text{CDCl}_3$ )

---9.721

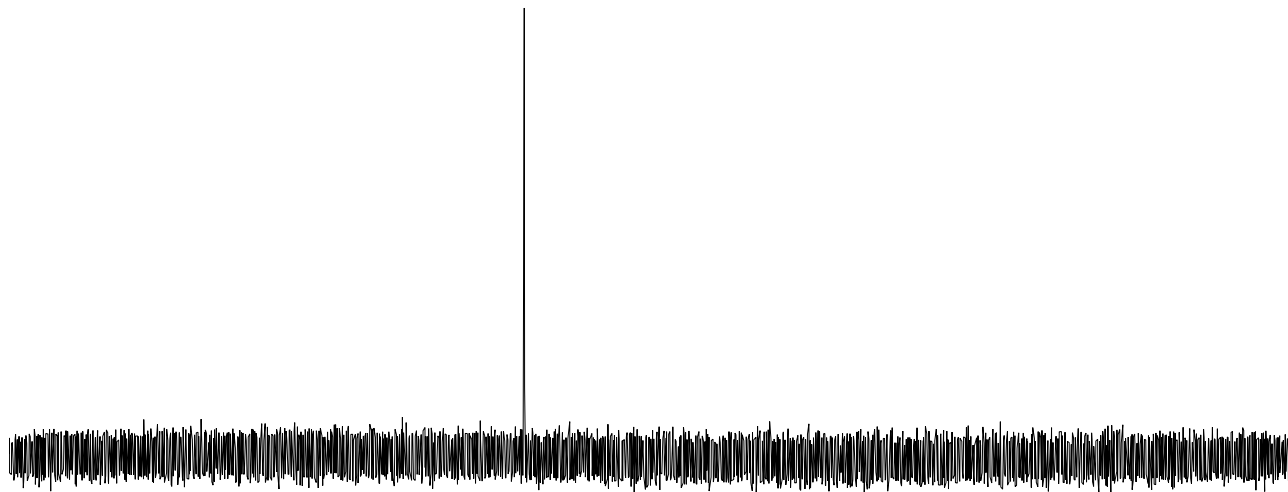

50 130 110 90 70 50 30 10 -10 -30 -50 -70 -90 -110 -130 -150 -170 -190 -210 -230 -25  
f1 (ppm)

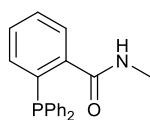

**C2**

(ESI-TOF)  $m/z$ :  $[\text{M} + \text{H}]^+$   
Calcd for  $\text{C}_{20}\text{H}_{19}\text{NOP}^+$  320.1199

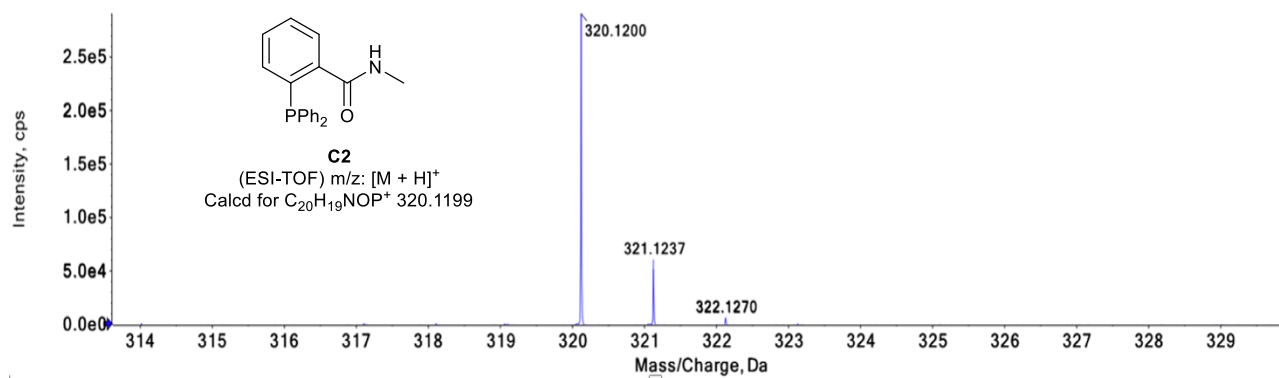

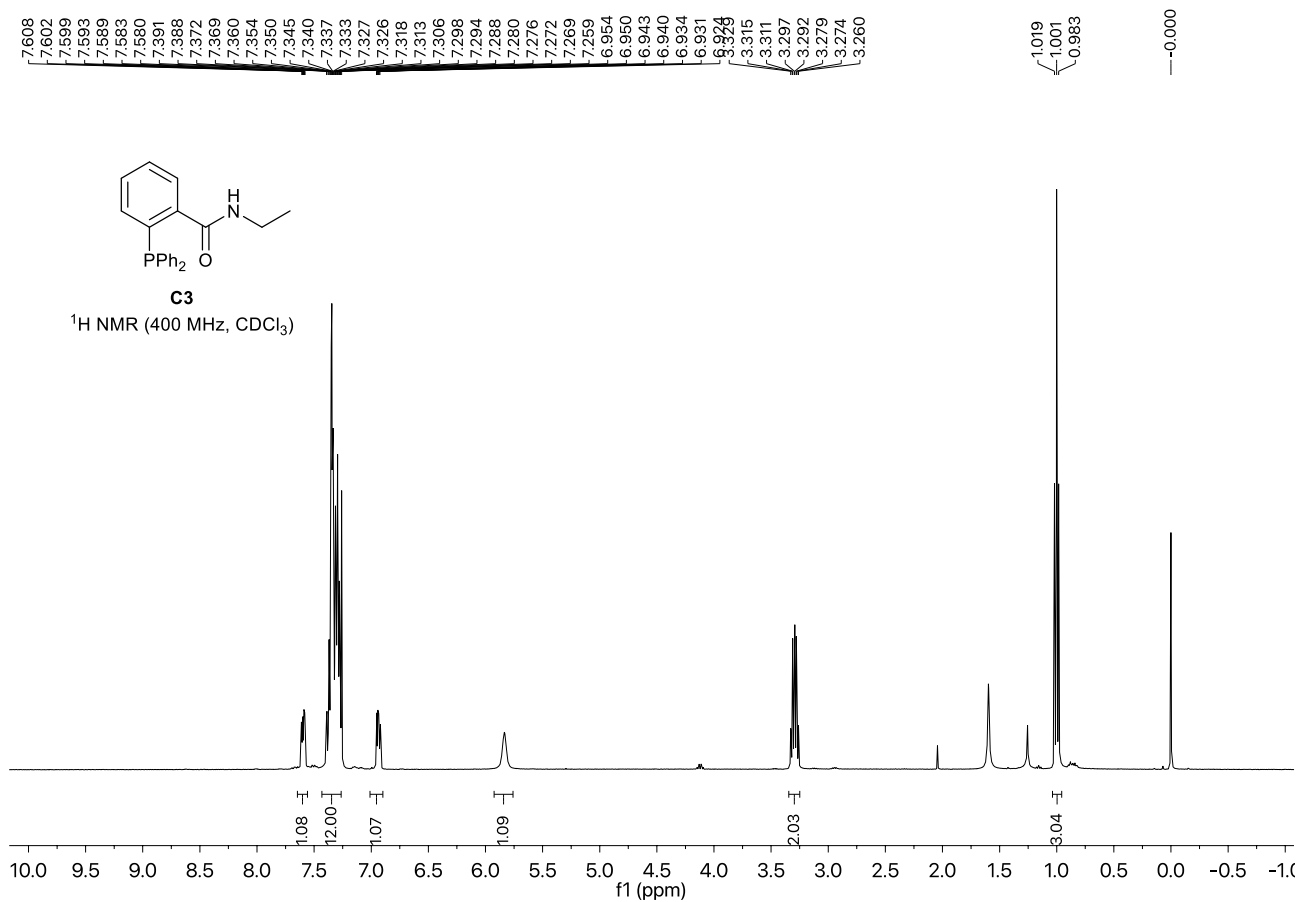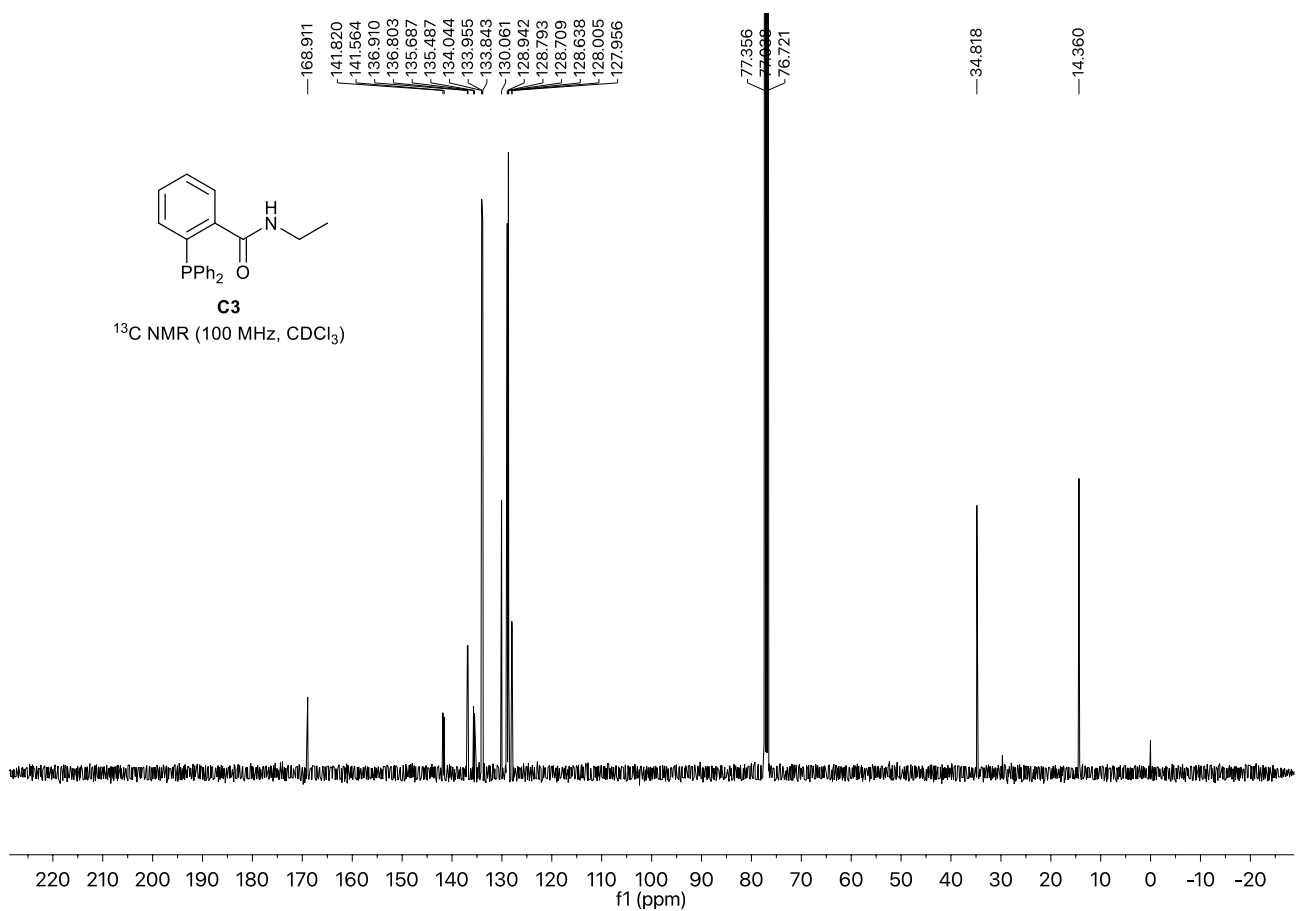

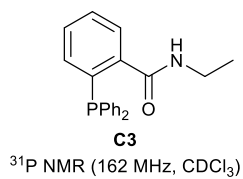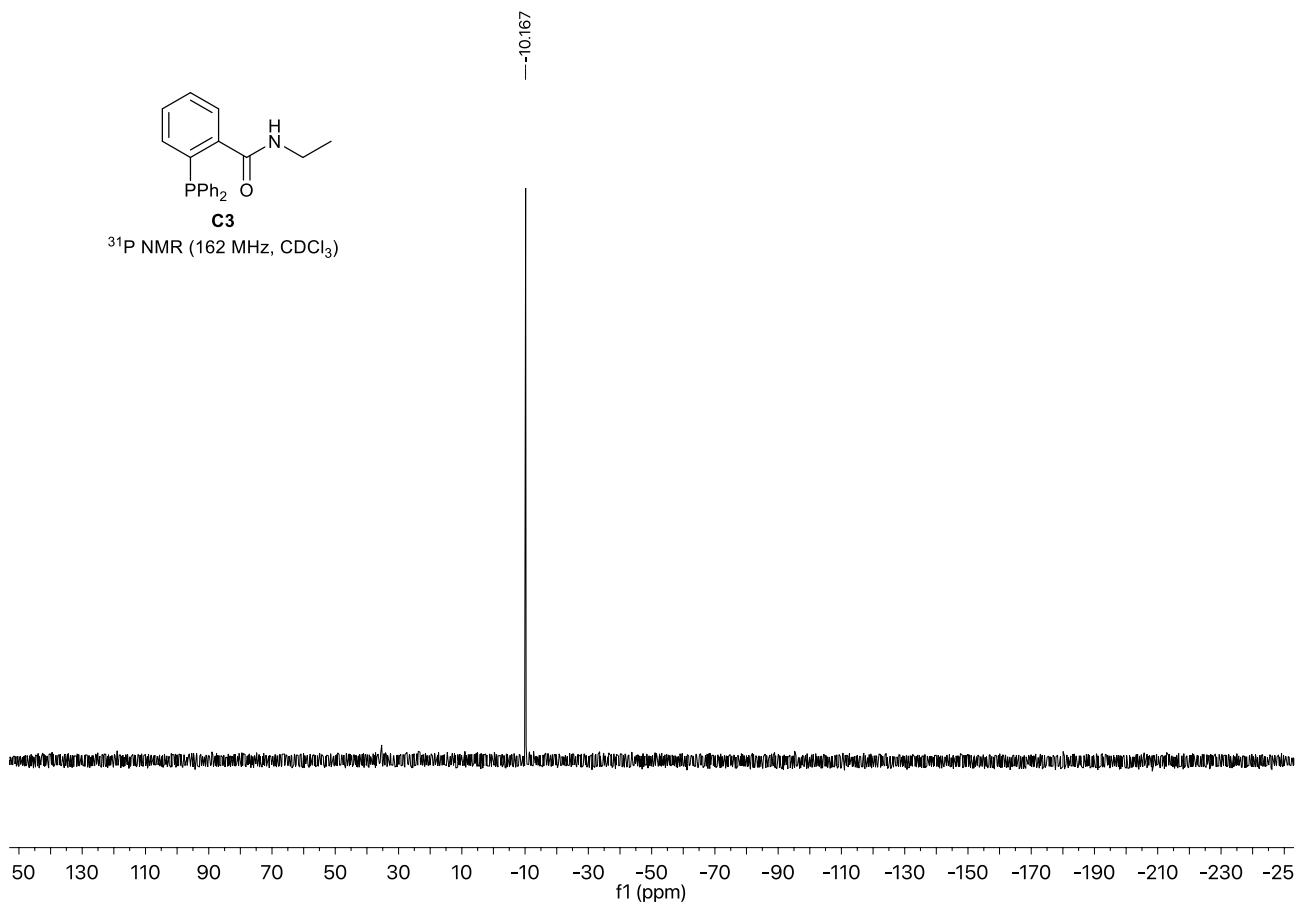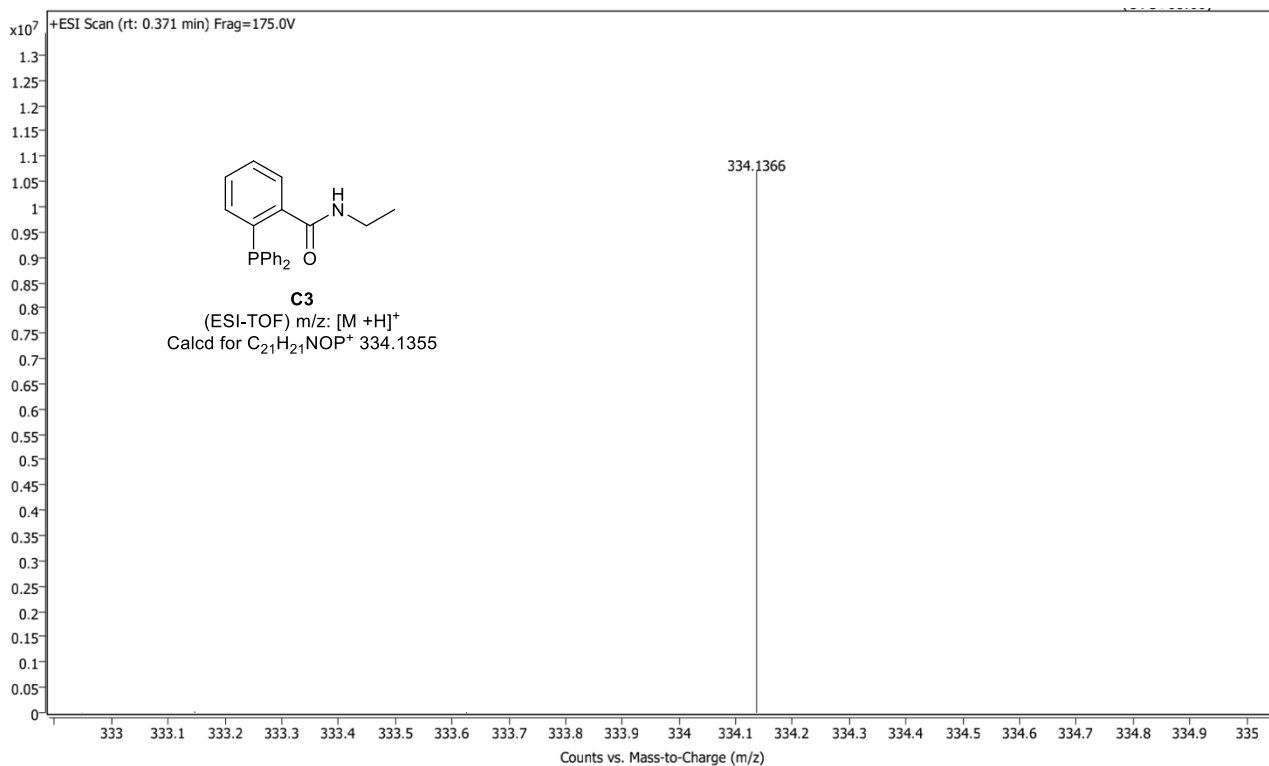



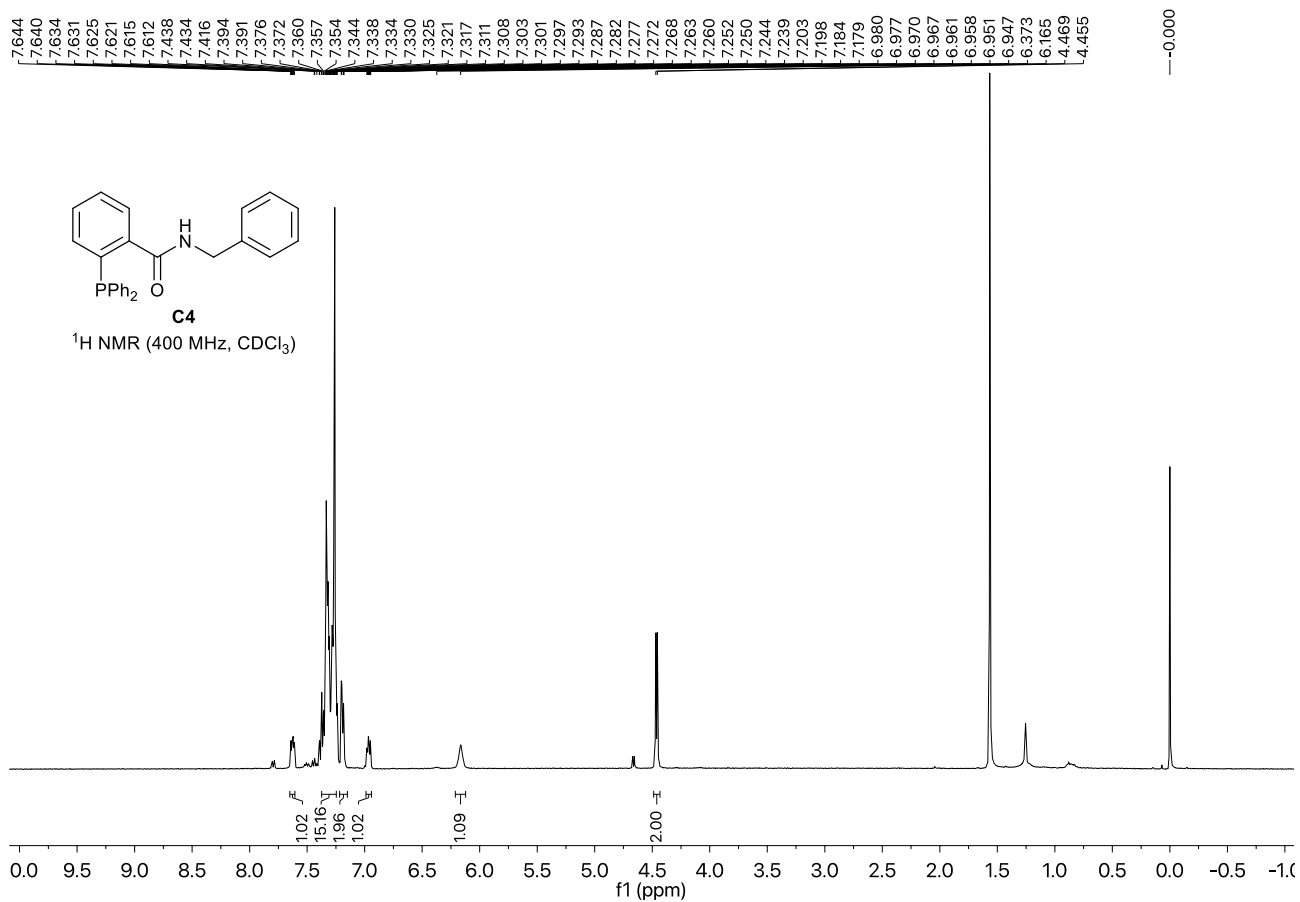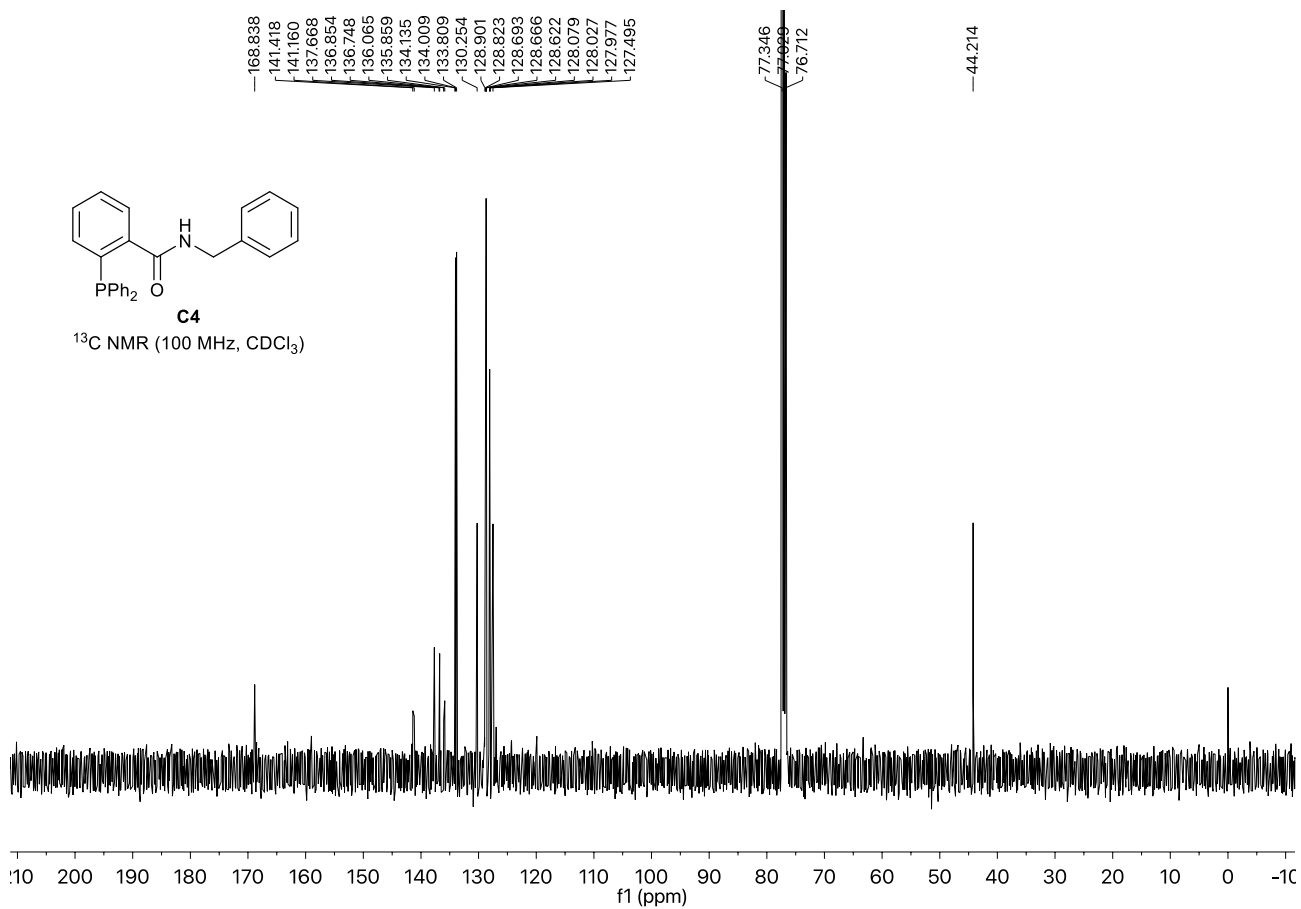

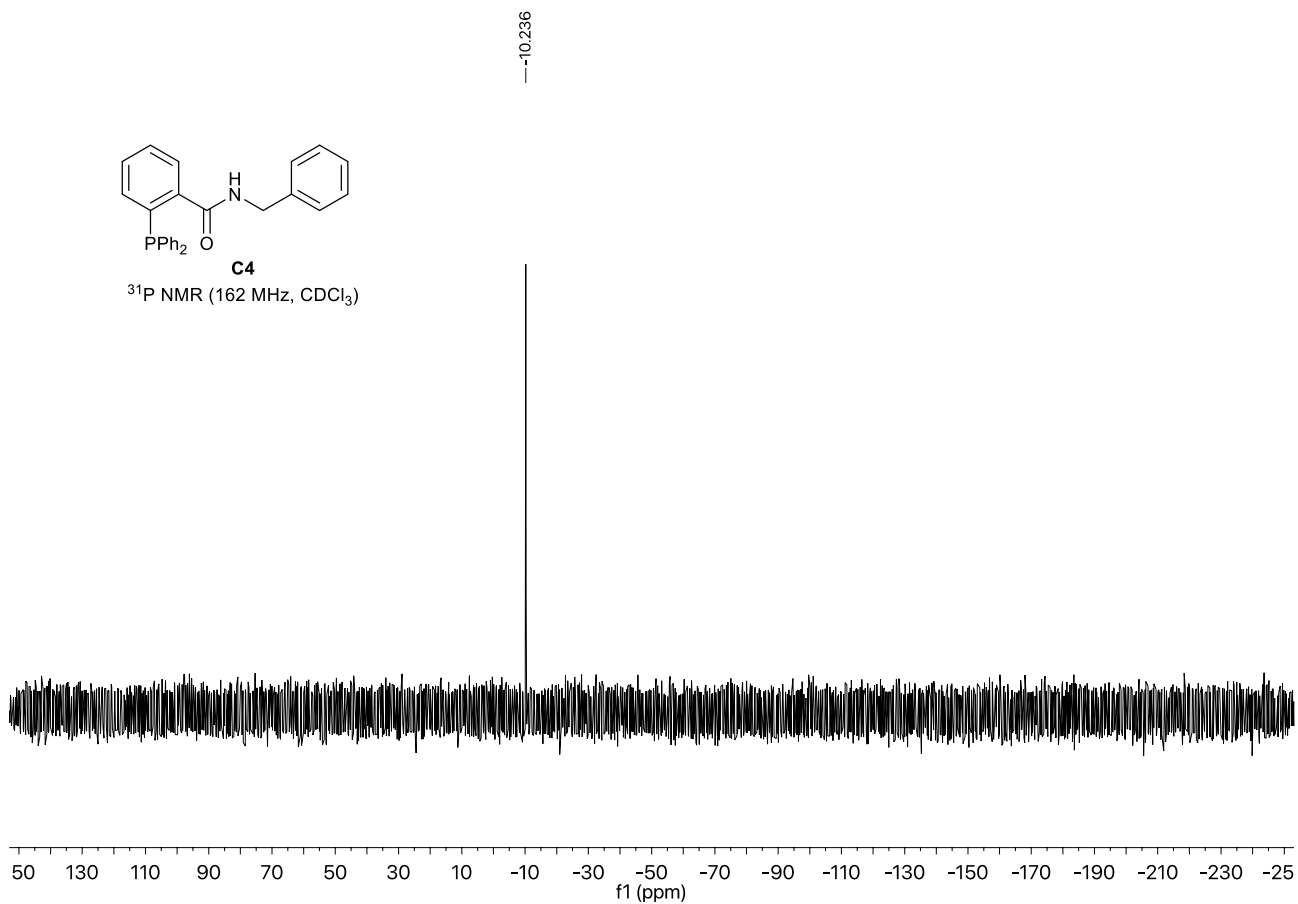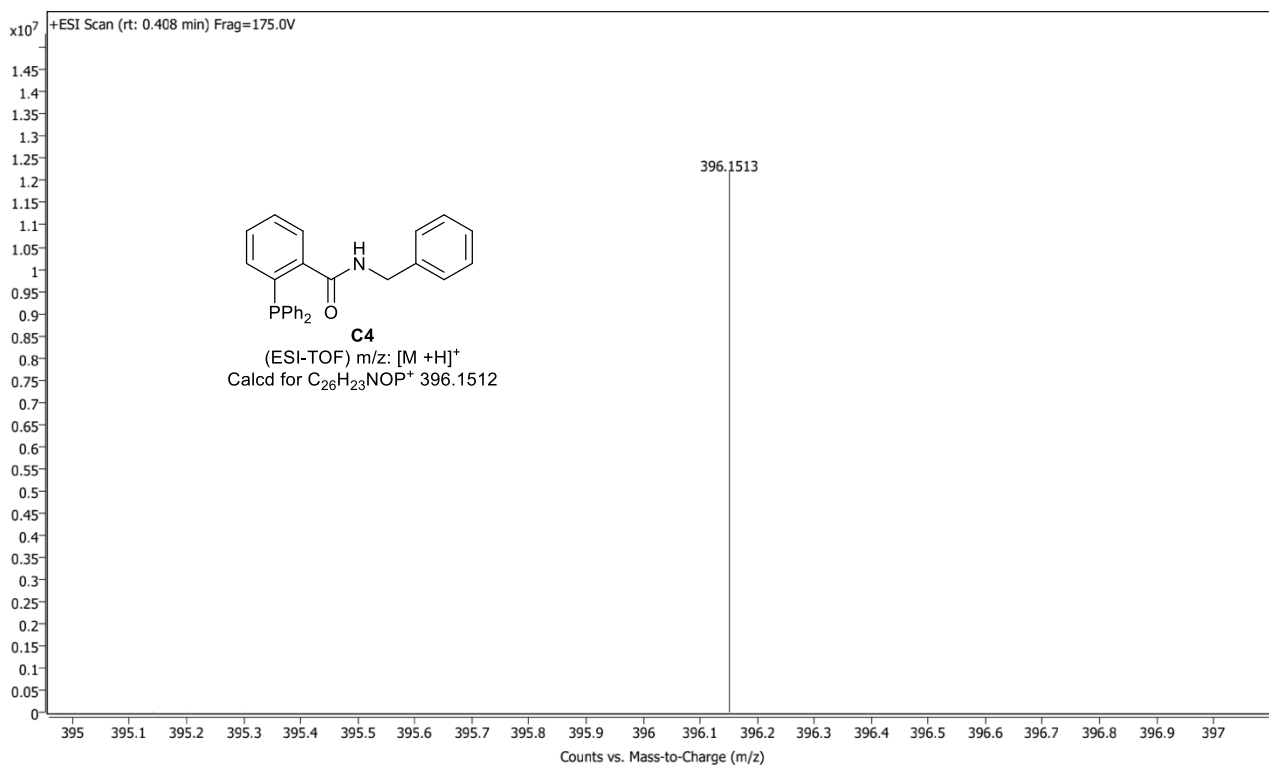

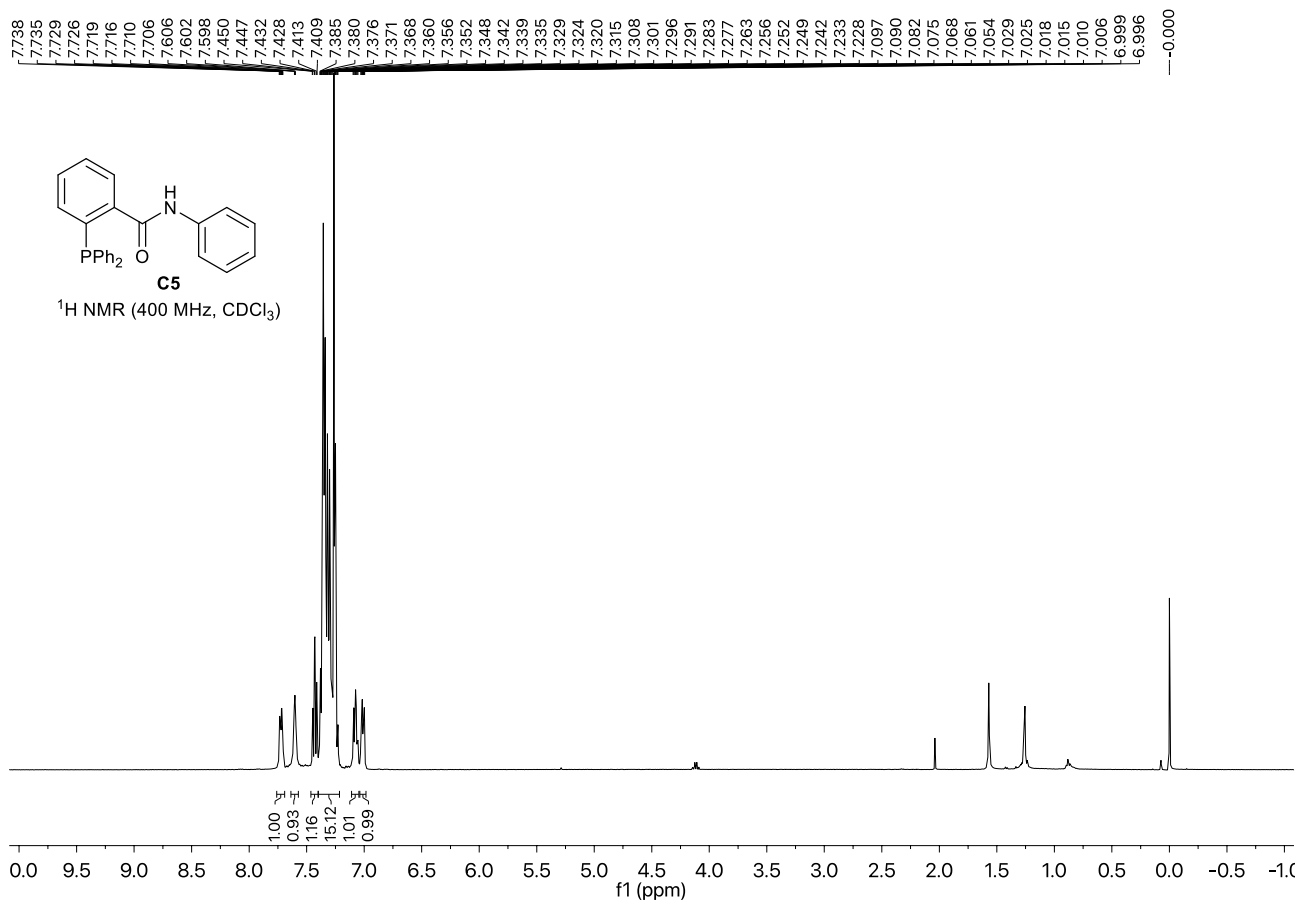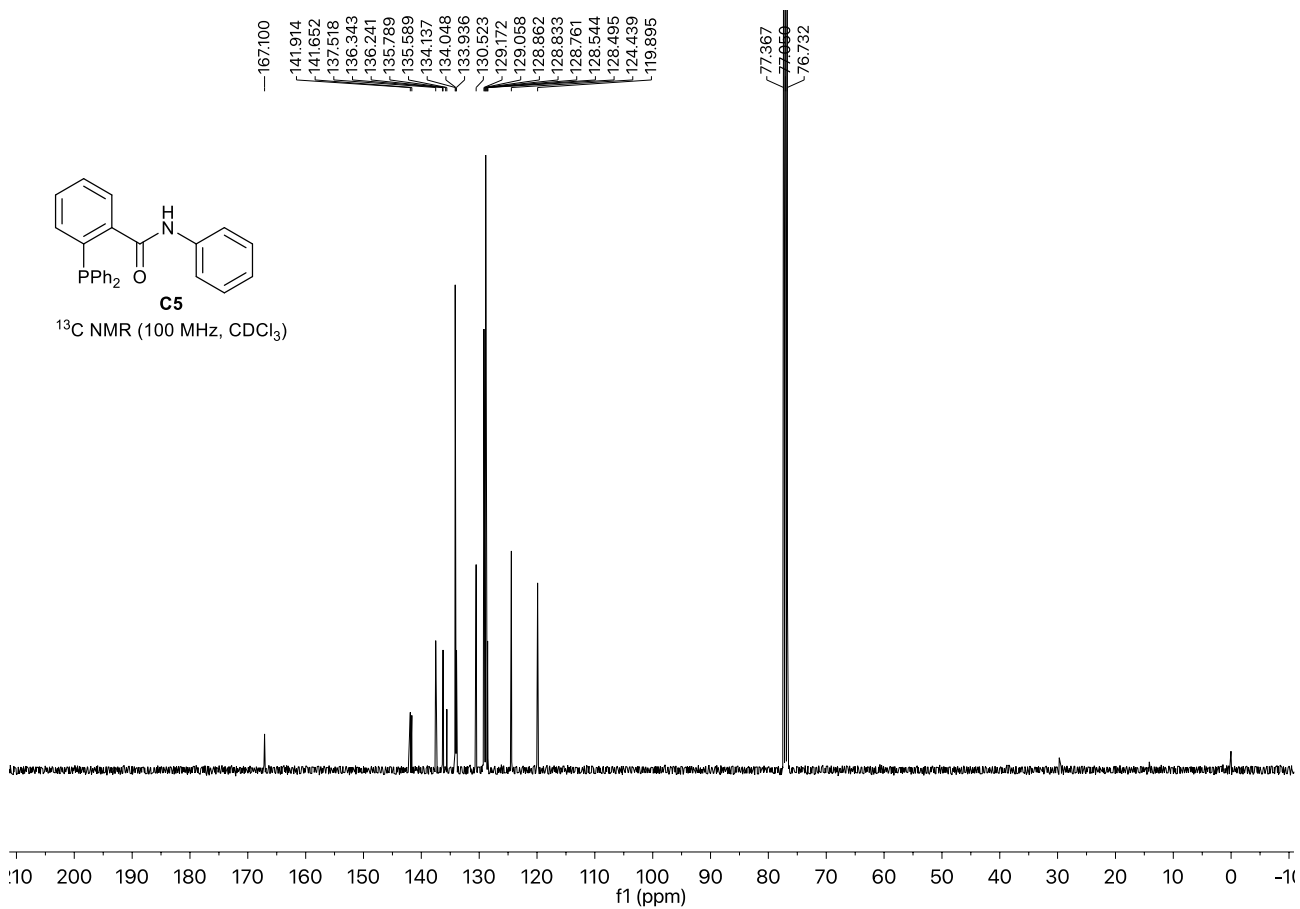

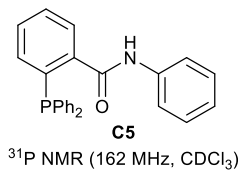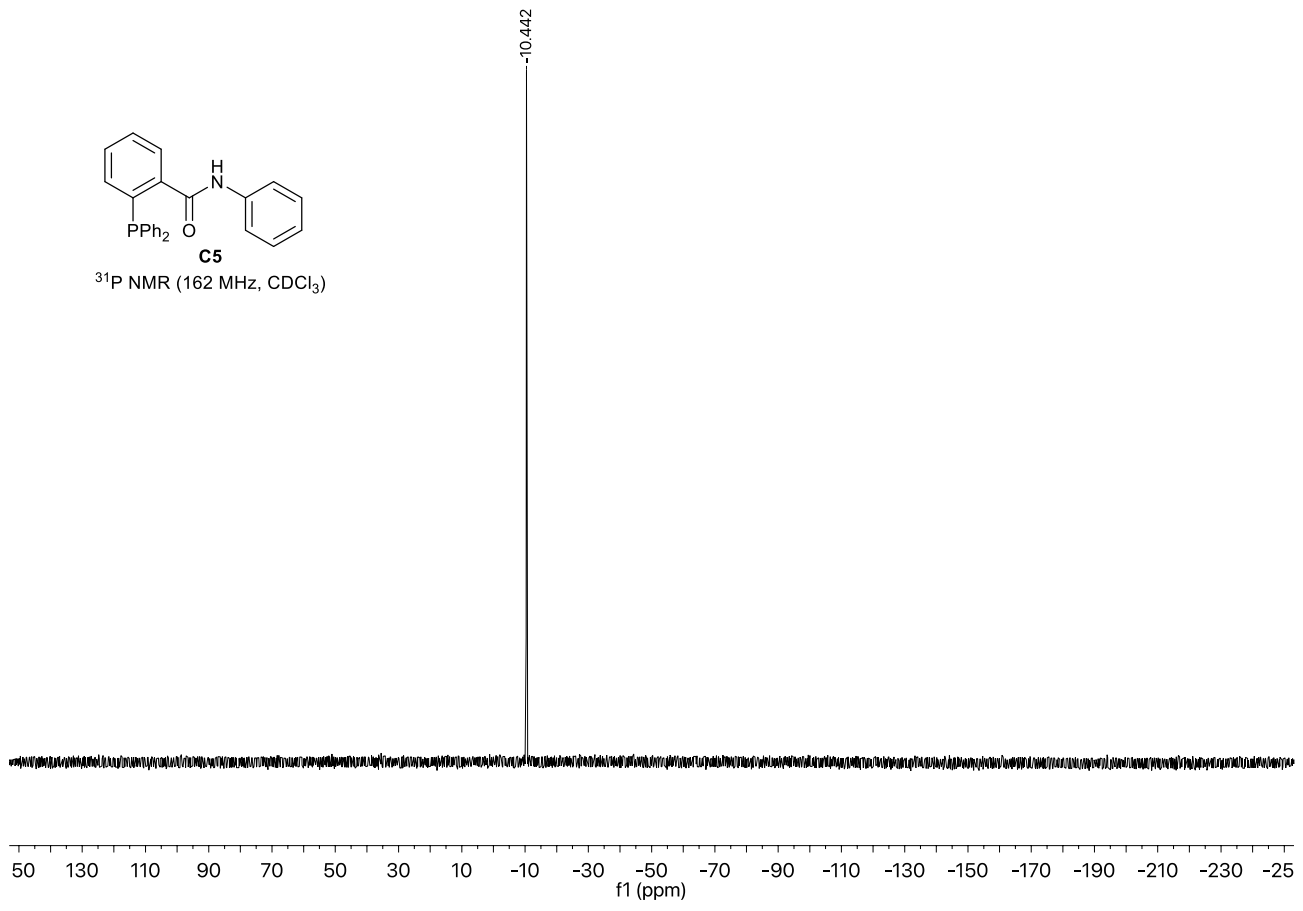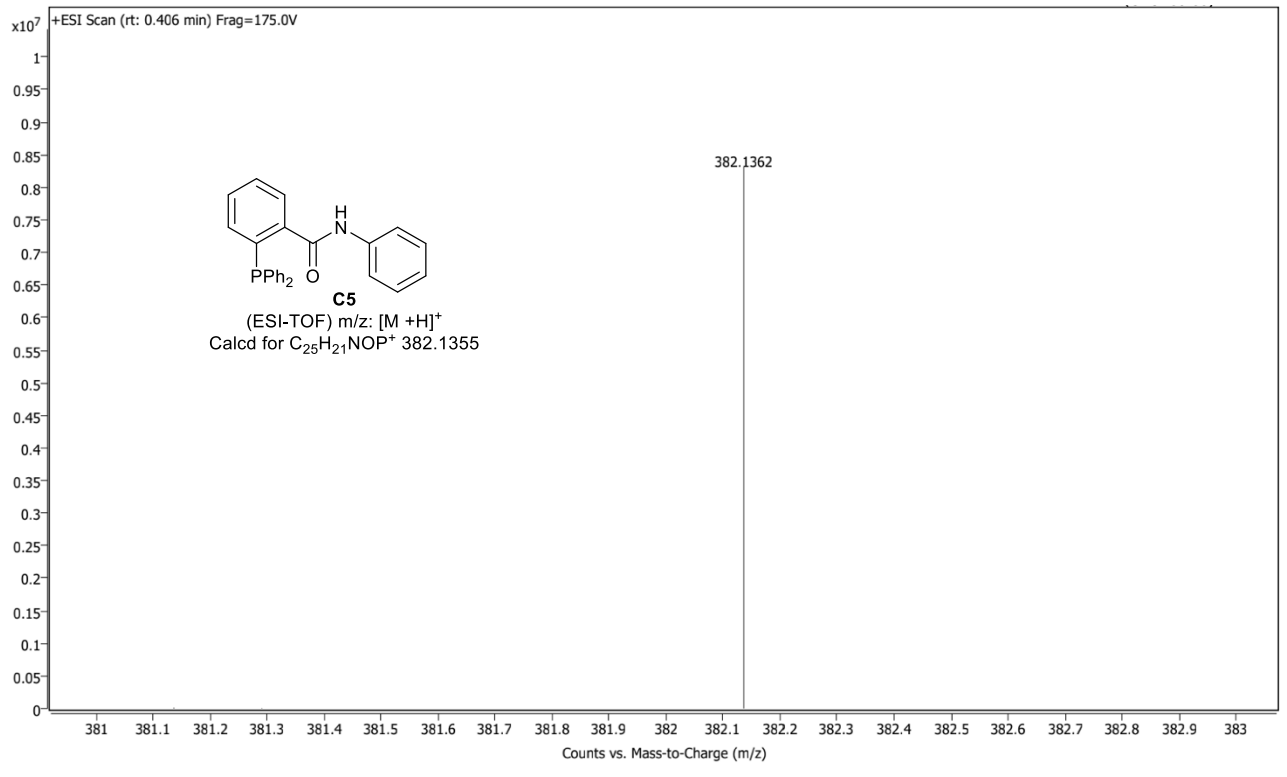

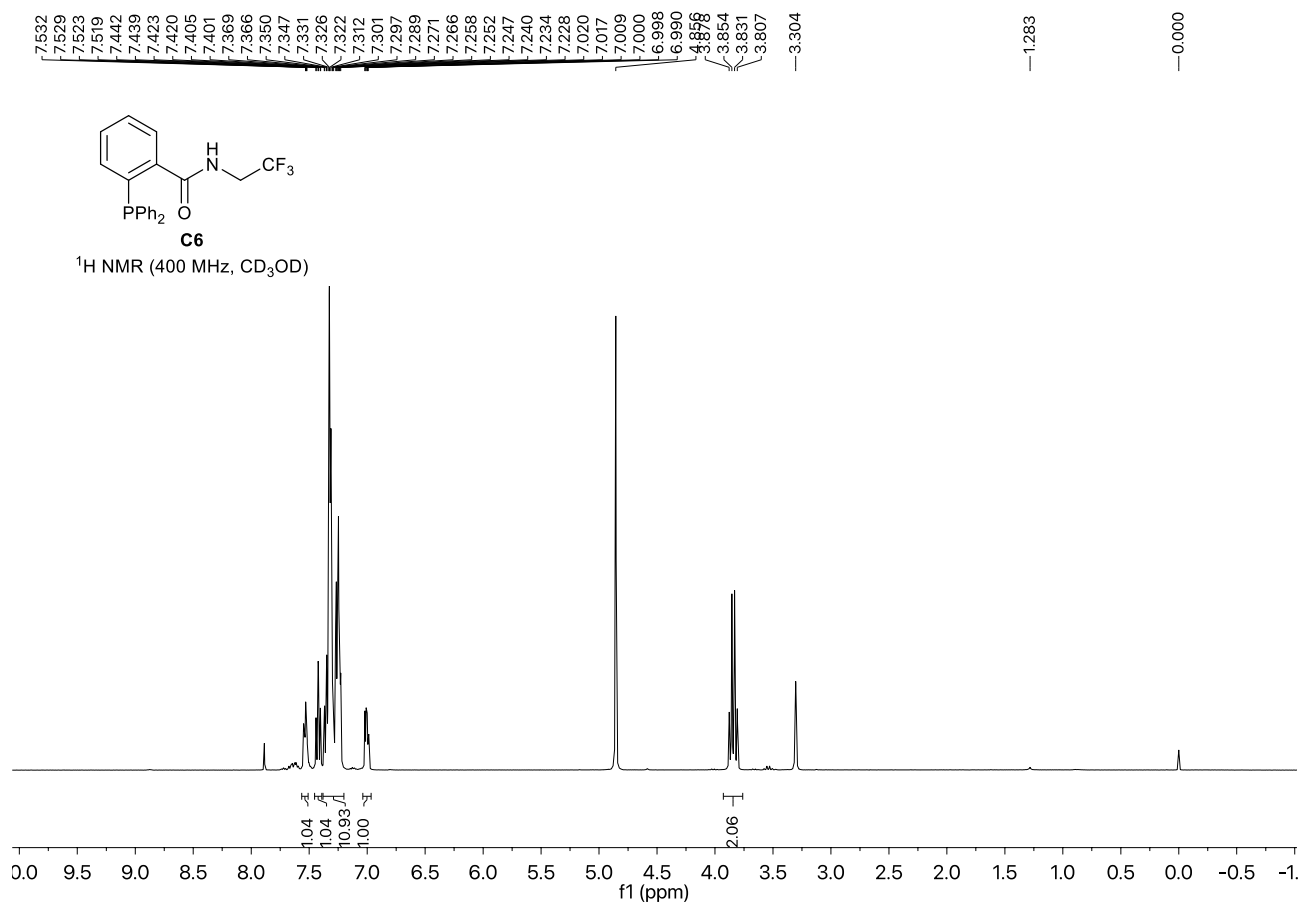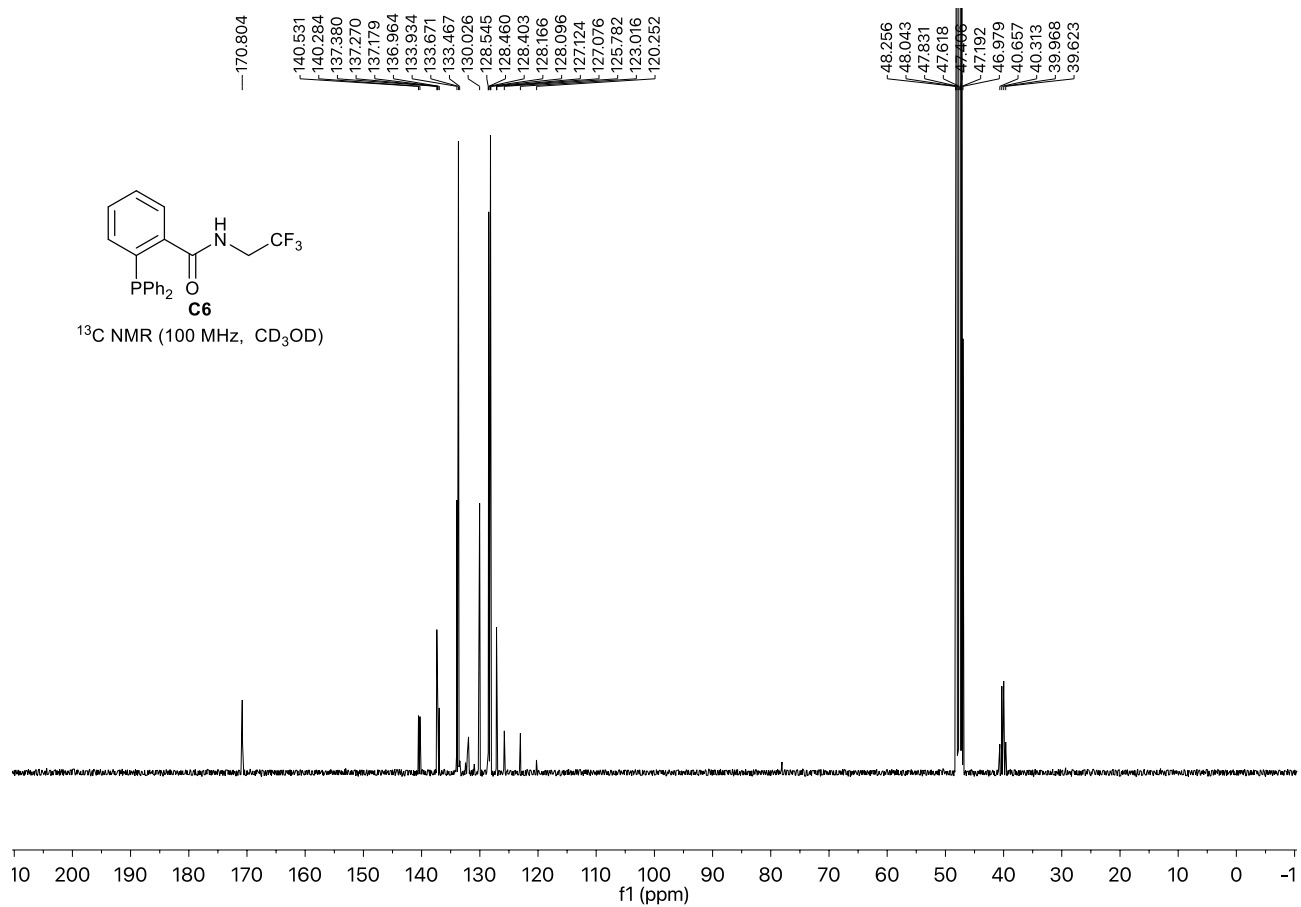

-73.456  
-73.461  
-73.480  
-73.487  
-73.506  
-73.511

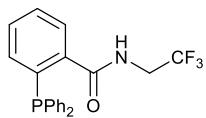

<sup>19</sup>F NMR (376 MHz, CD<sub>3</sub>OD)

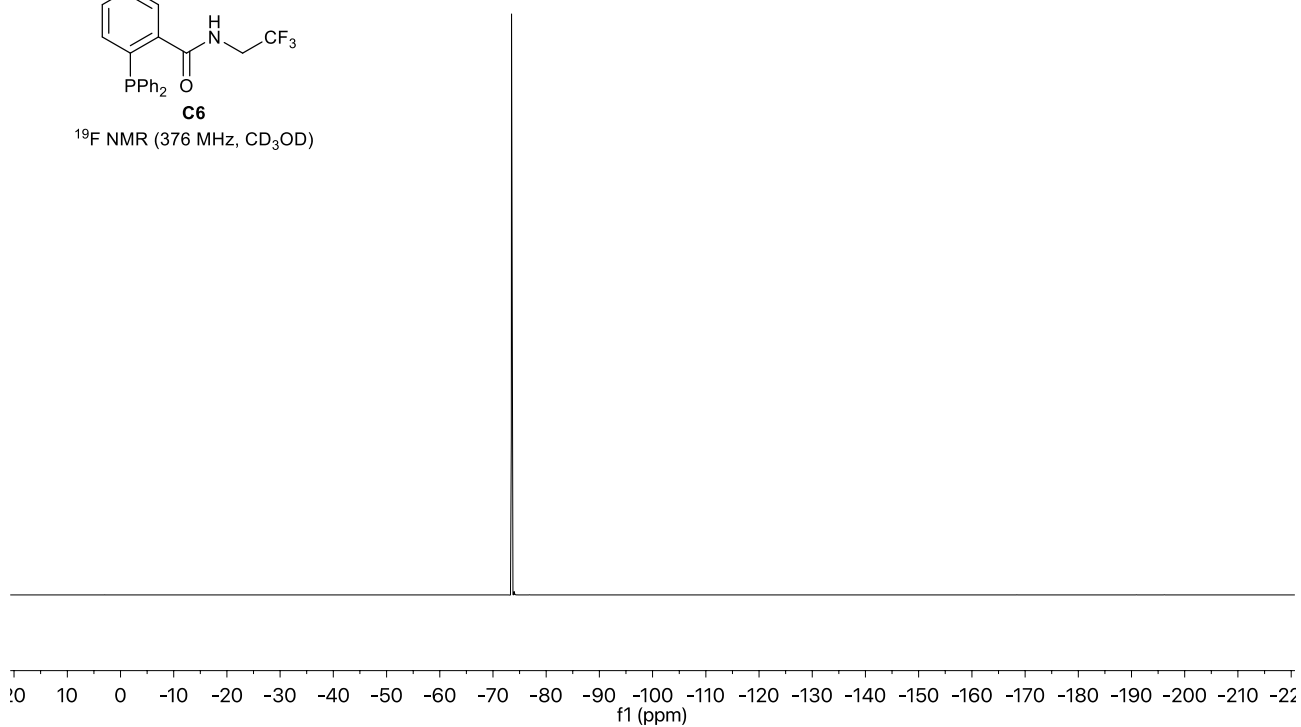

-9.559

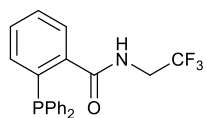

<sup>31</sup>P NMR (162 MHz, CD<sub>3</sub>OD)

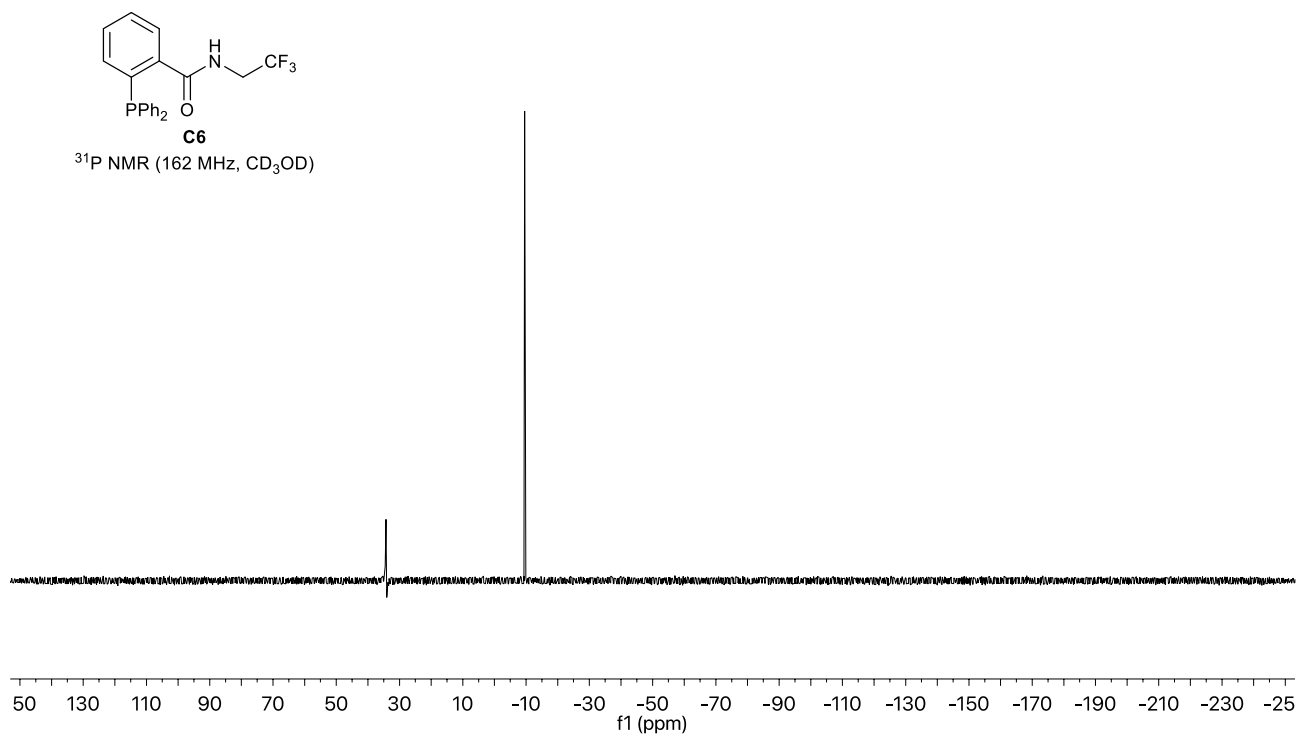

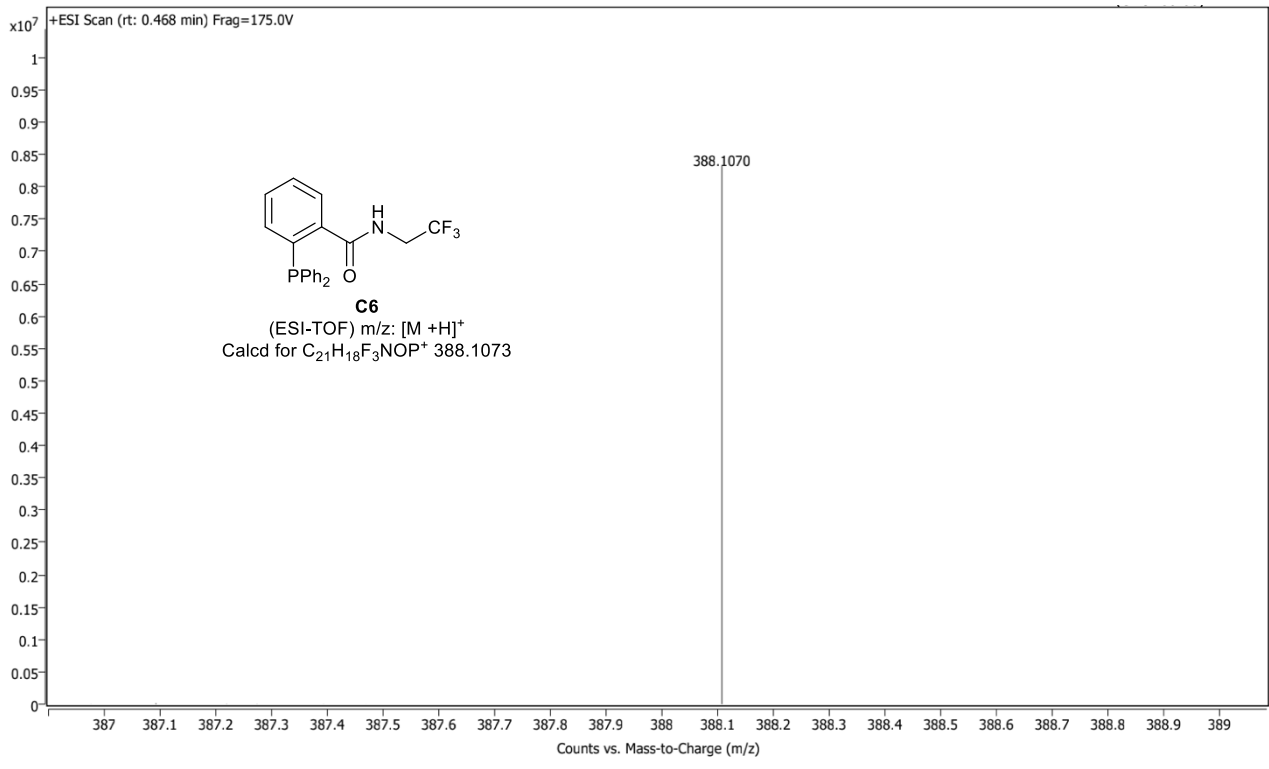

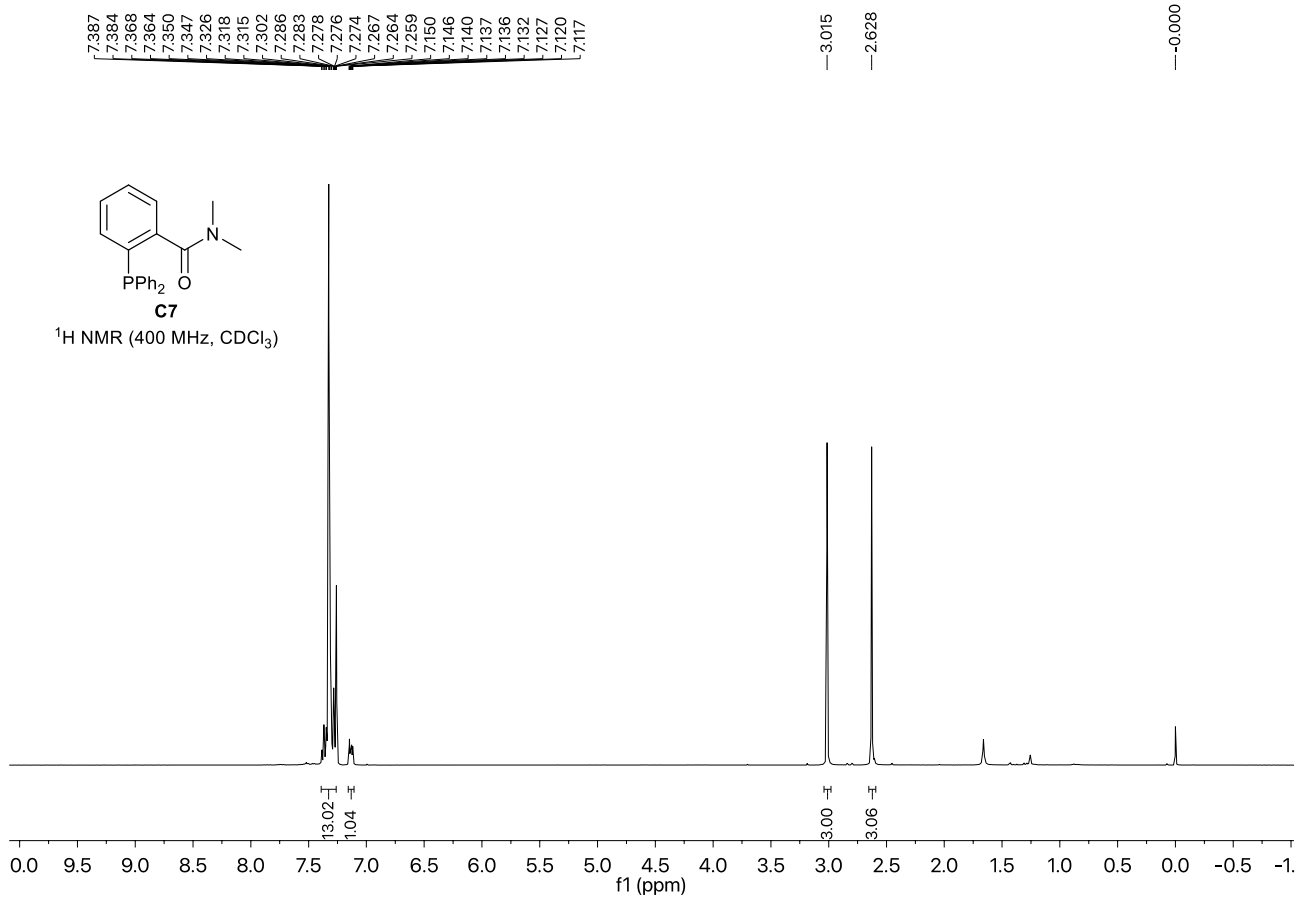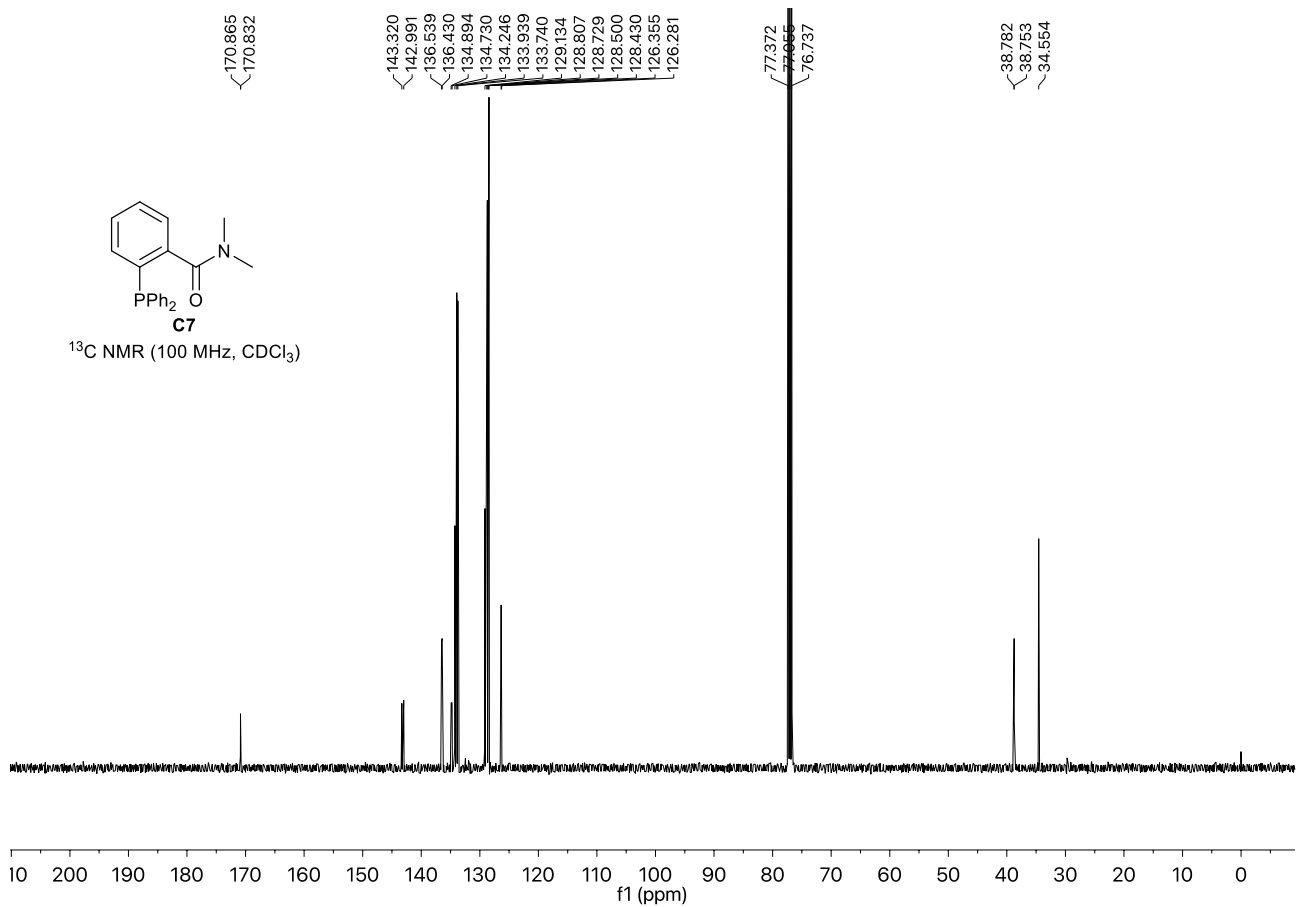



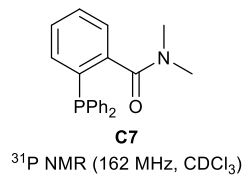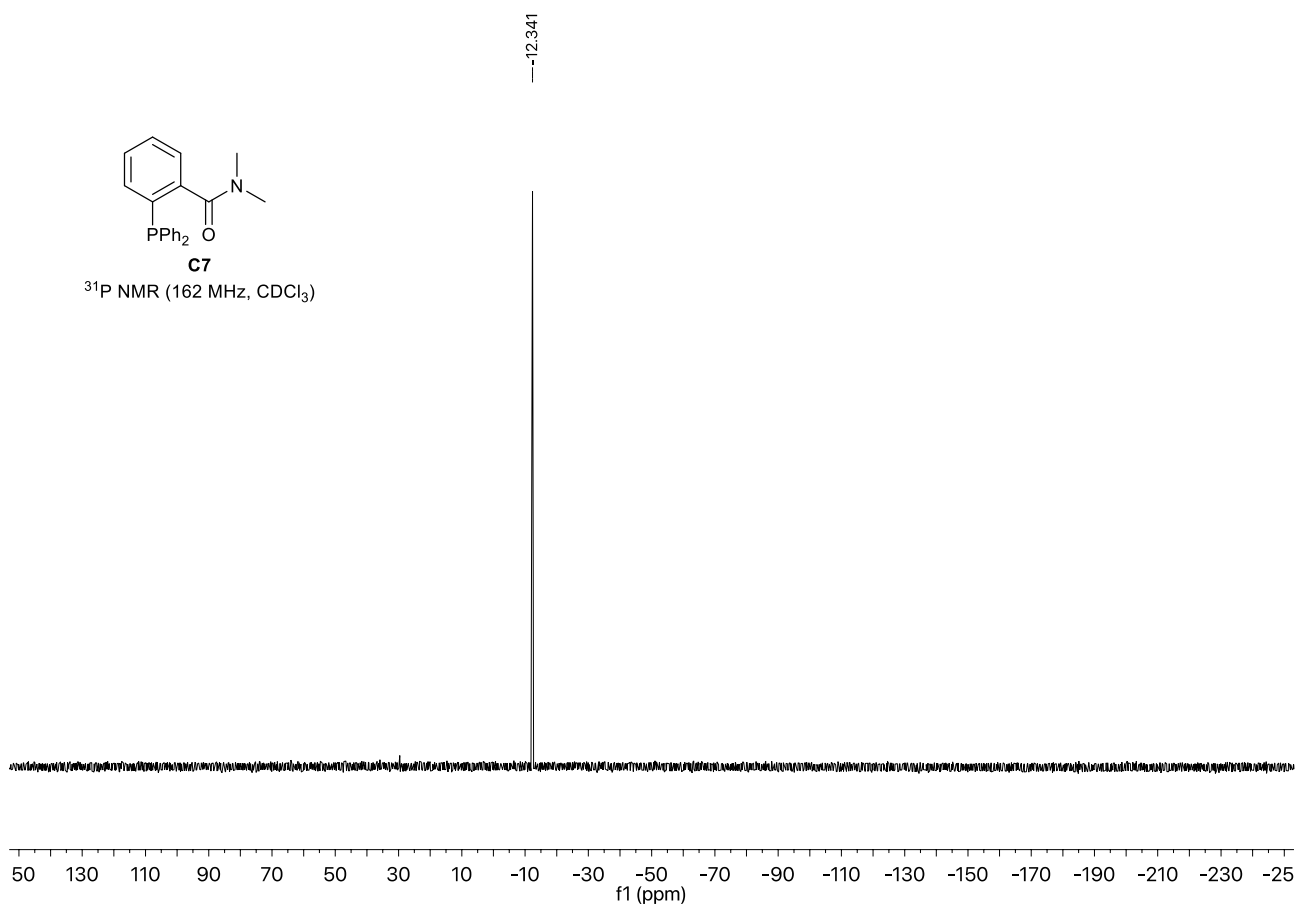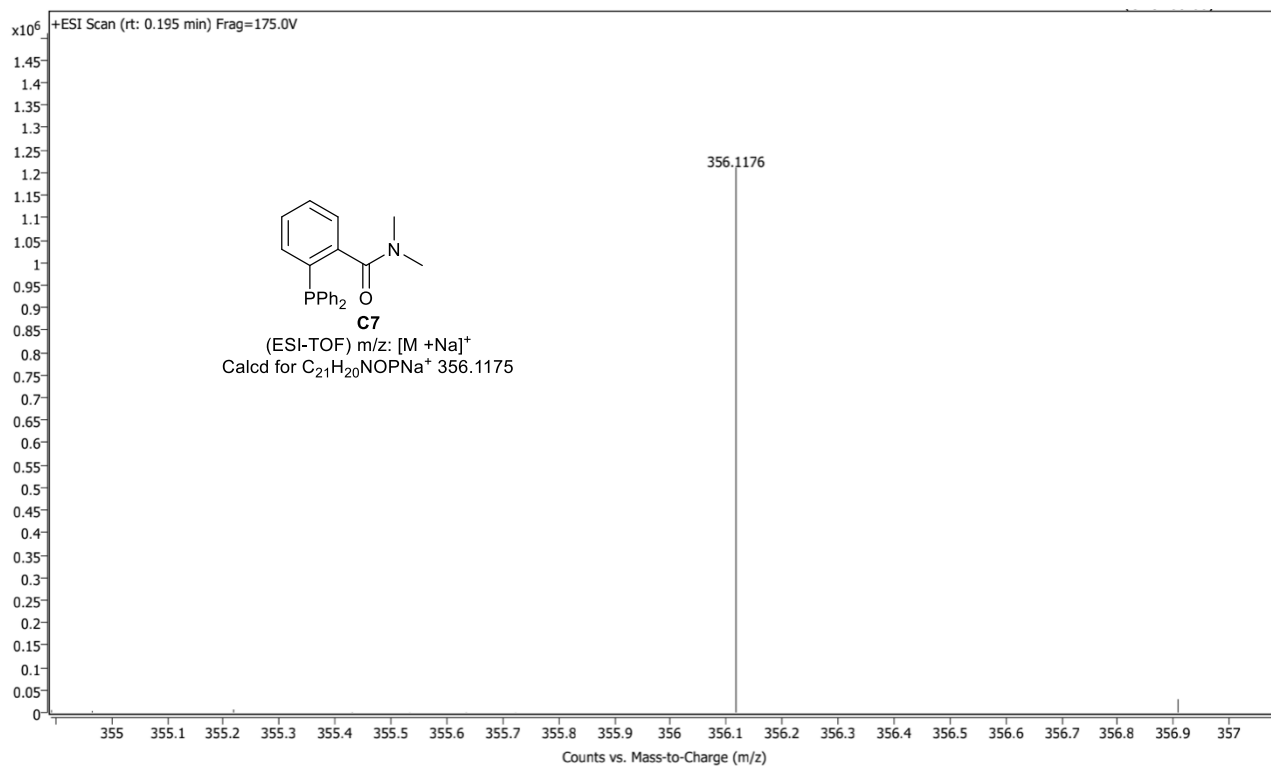

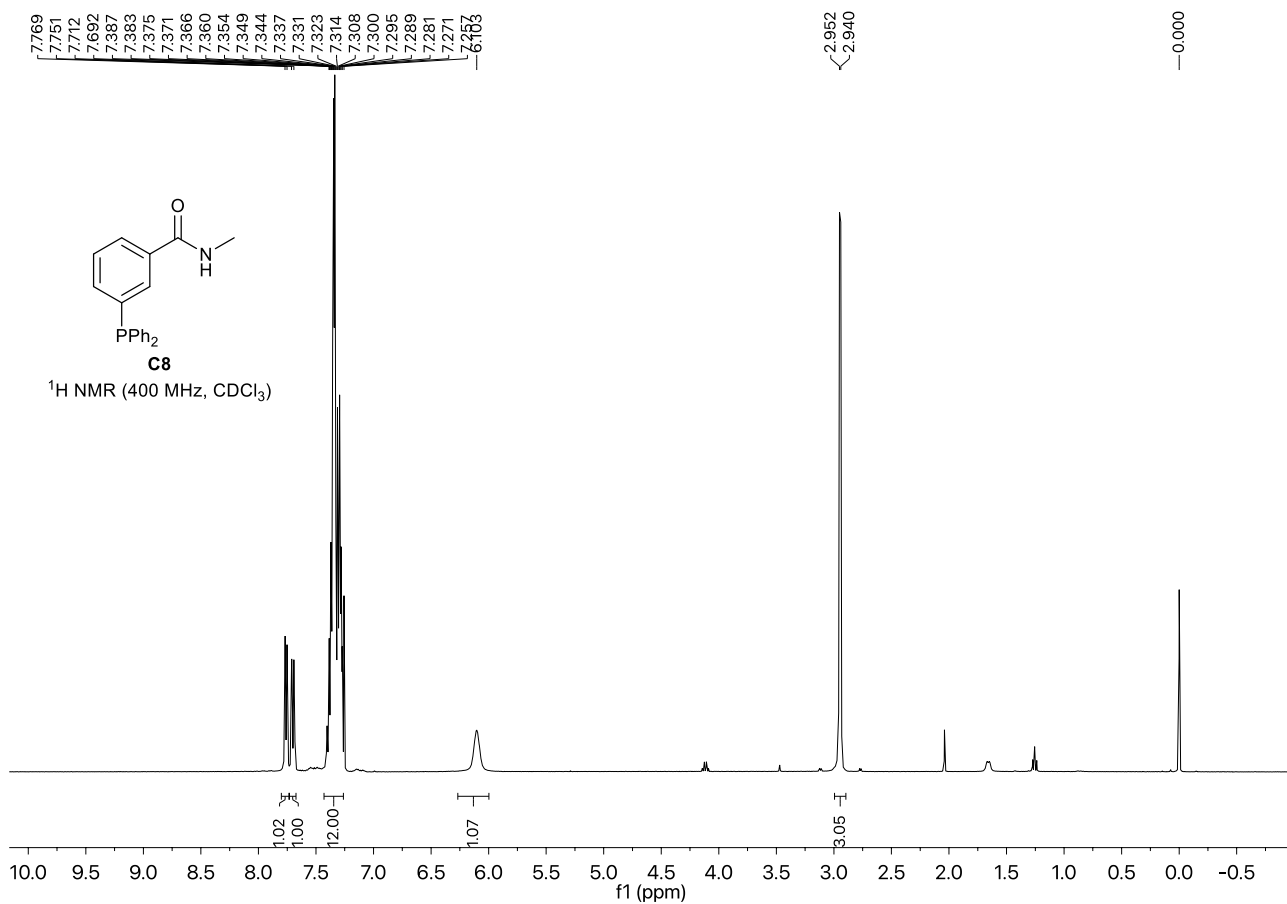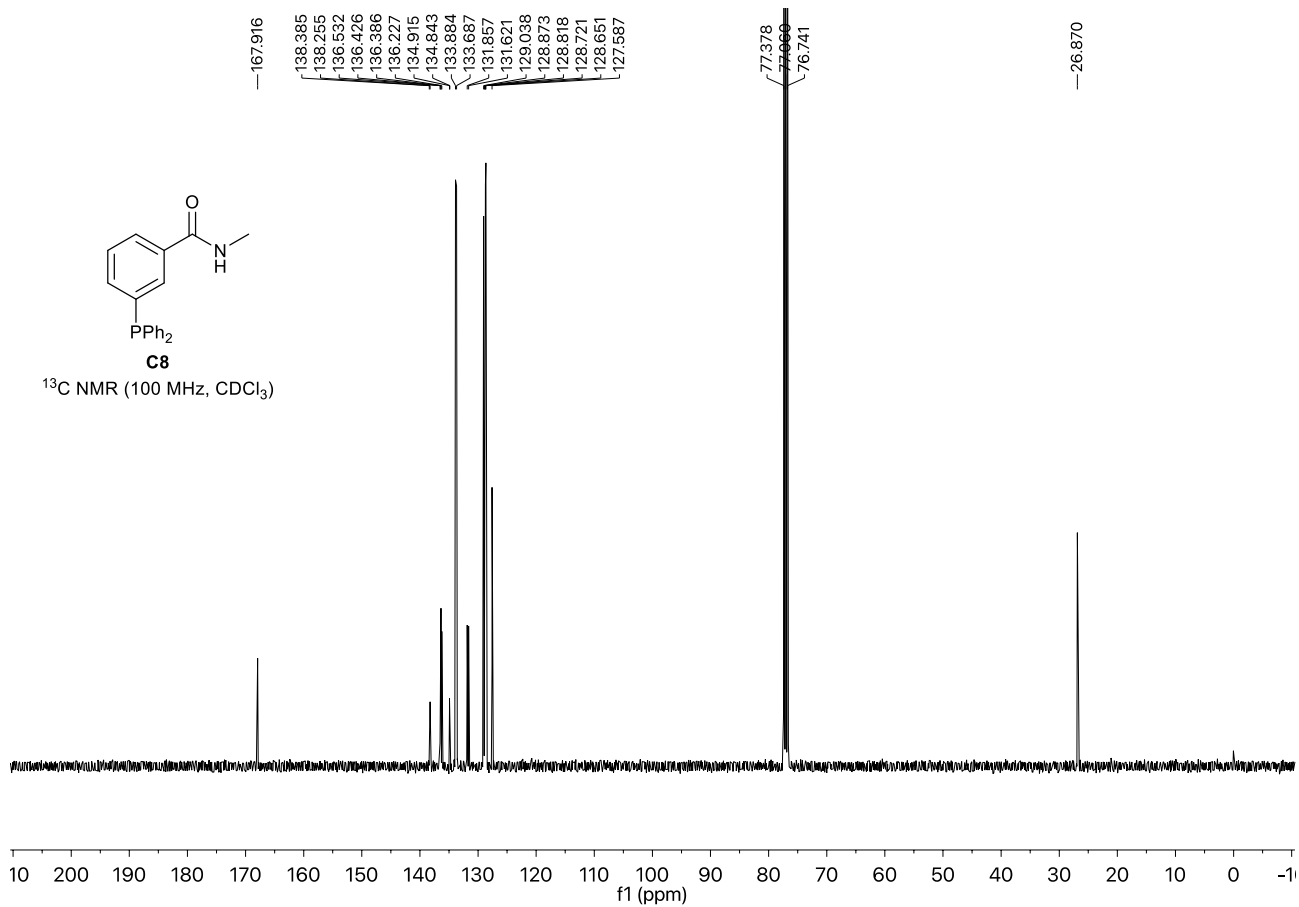

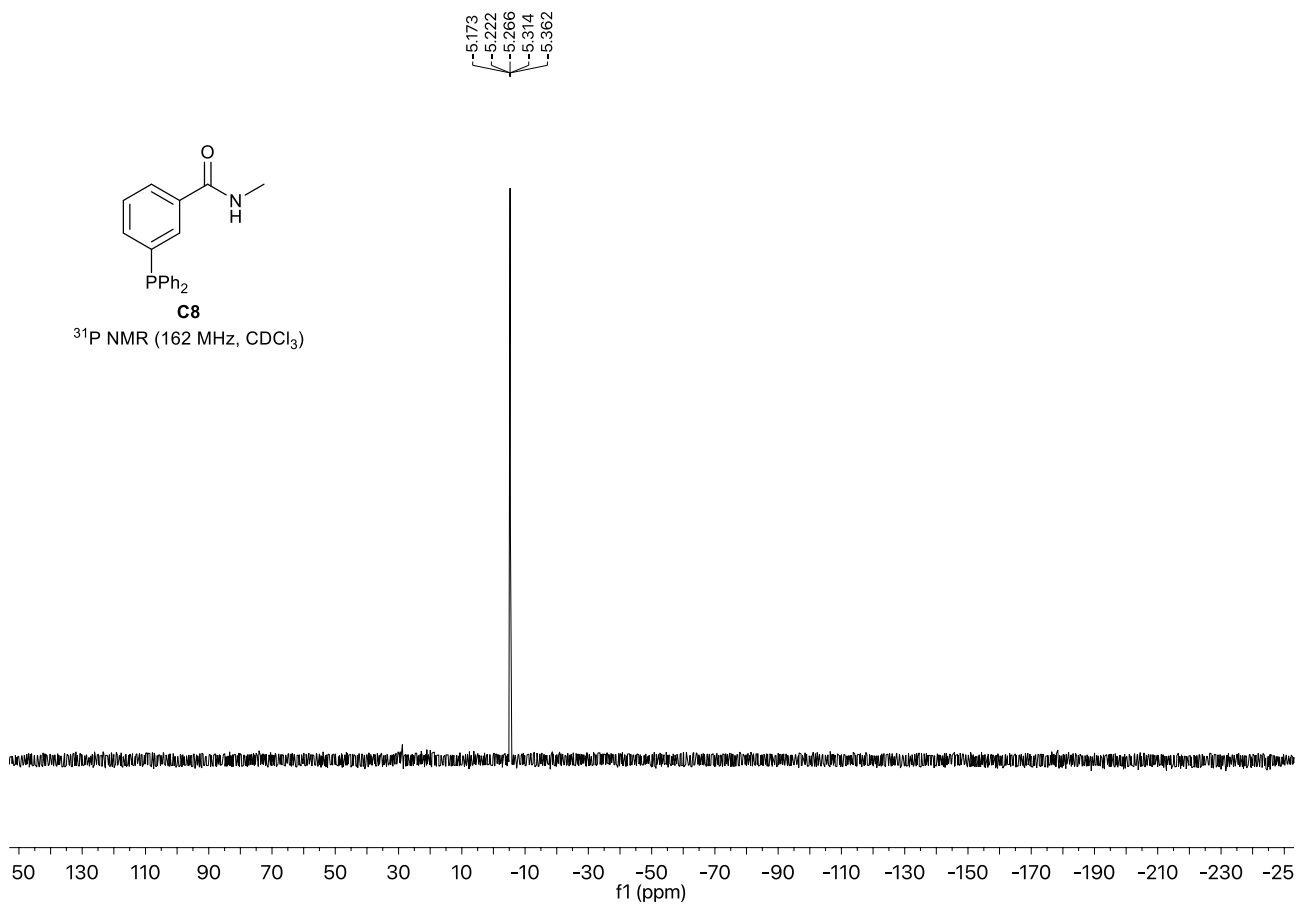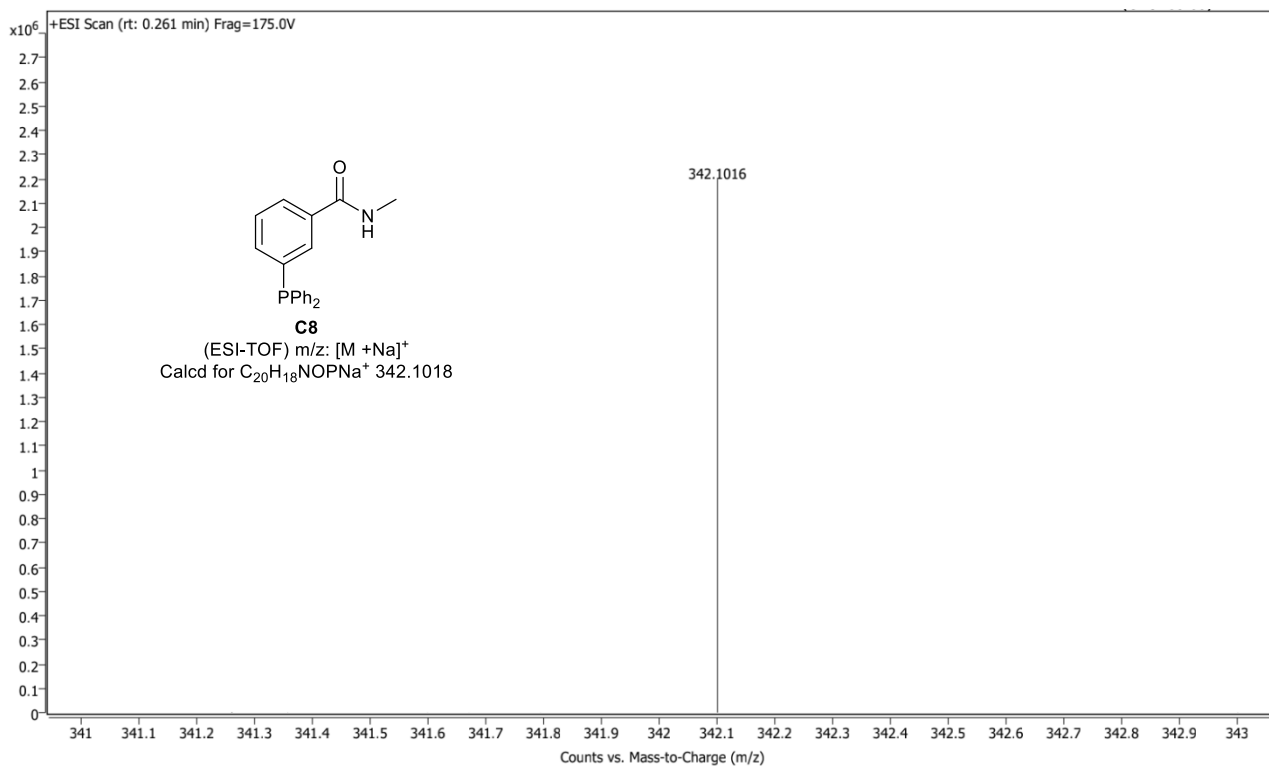

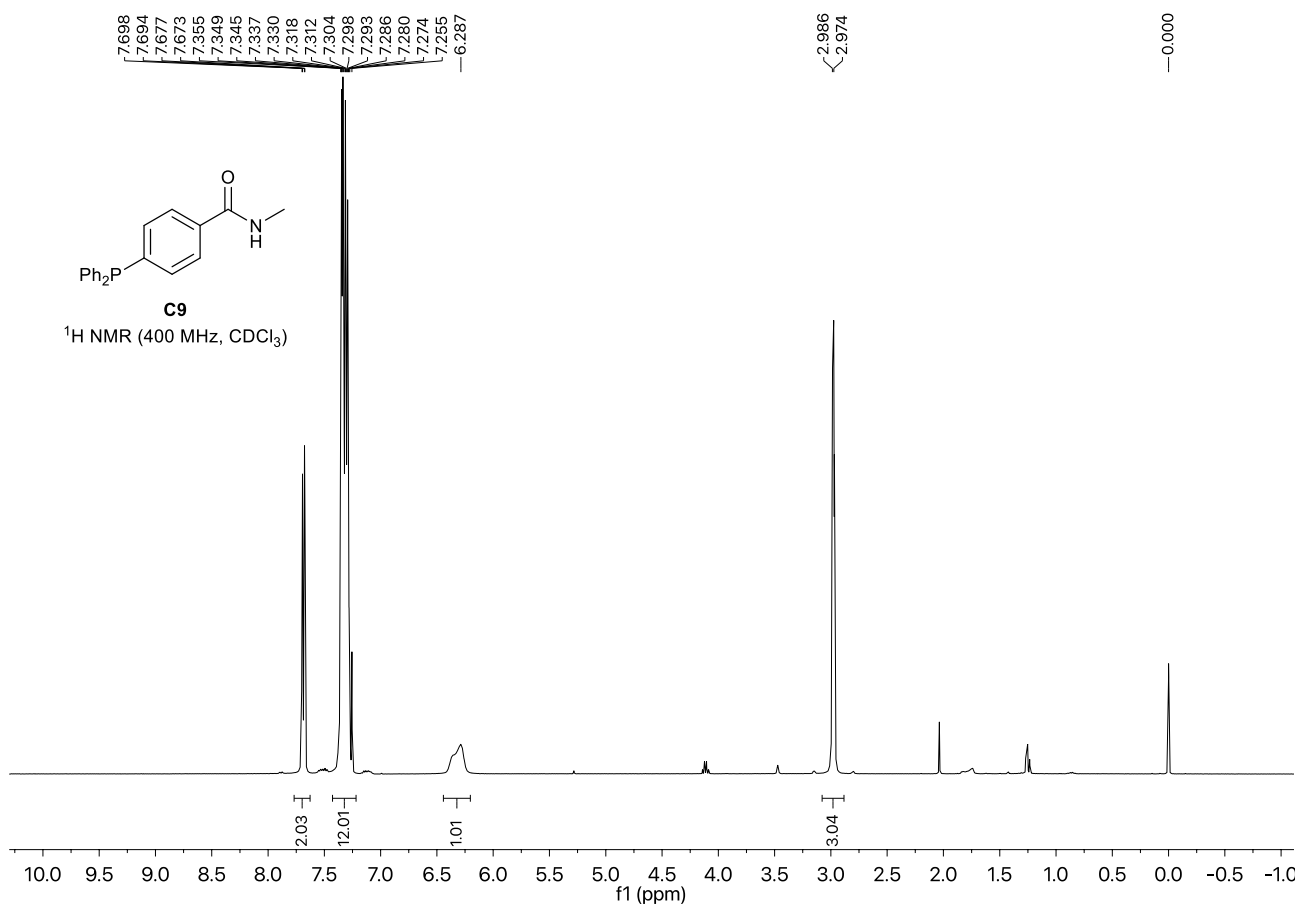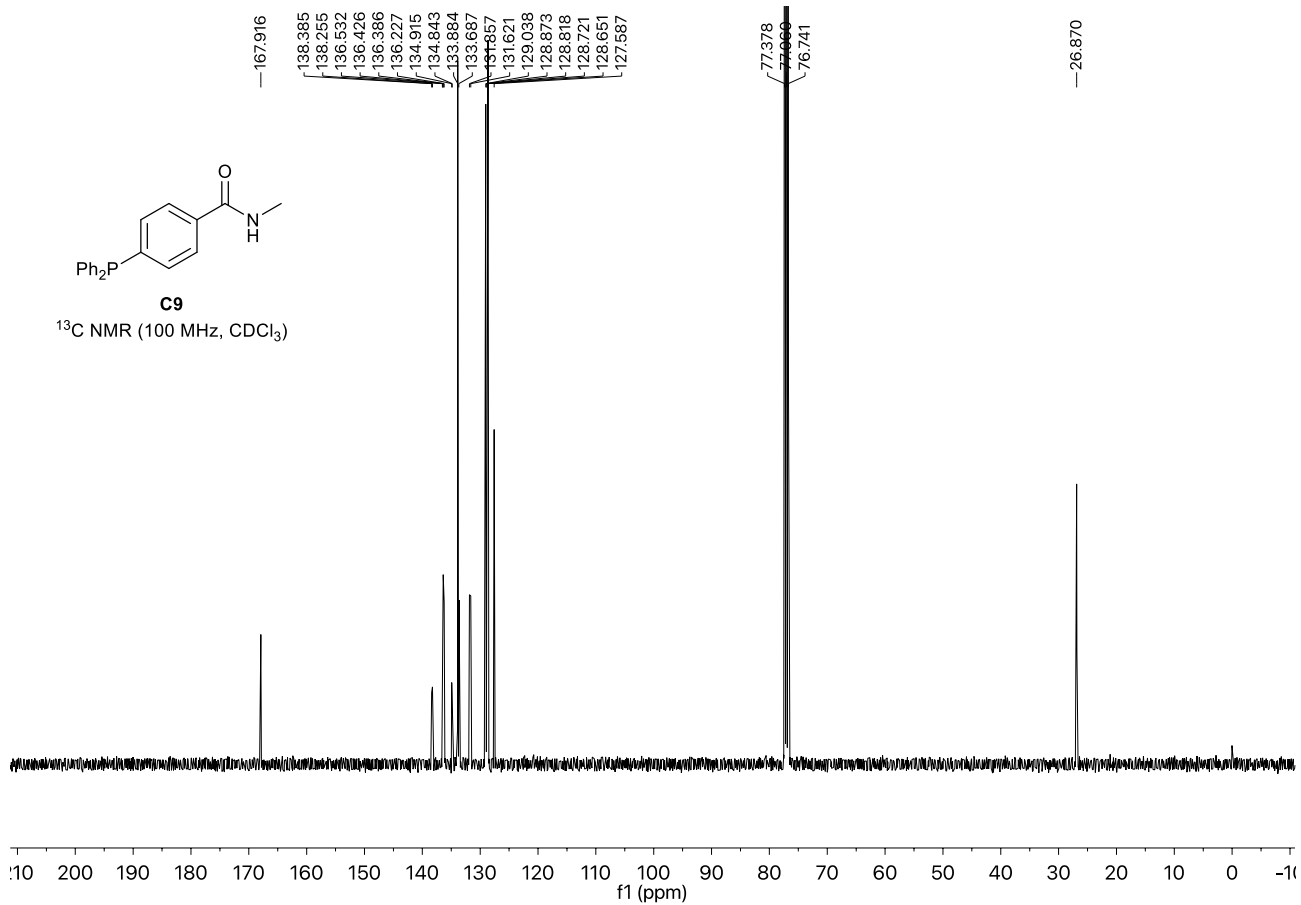

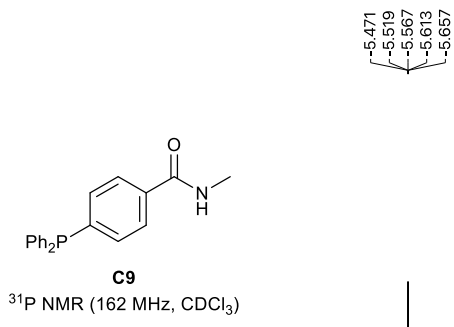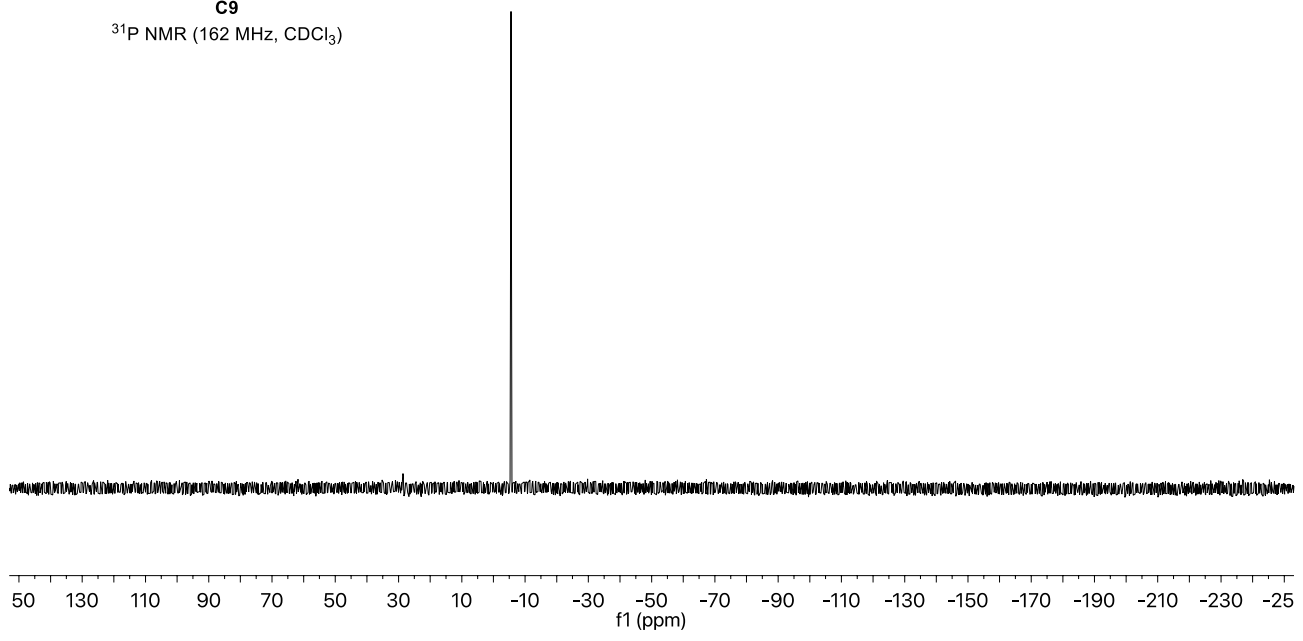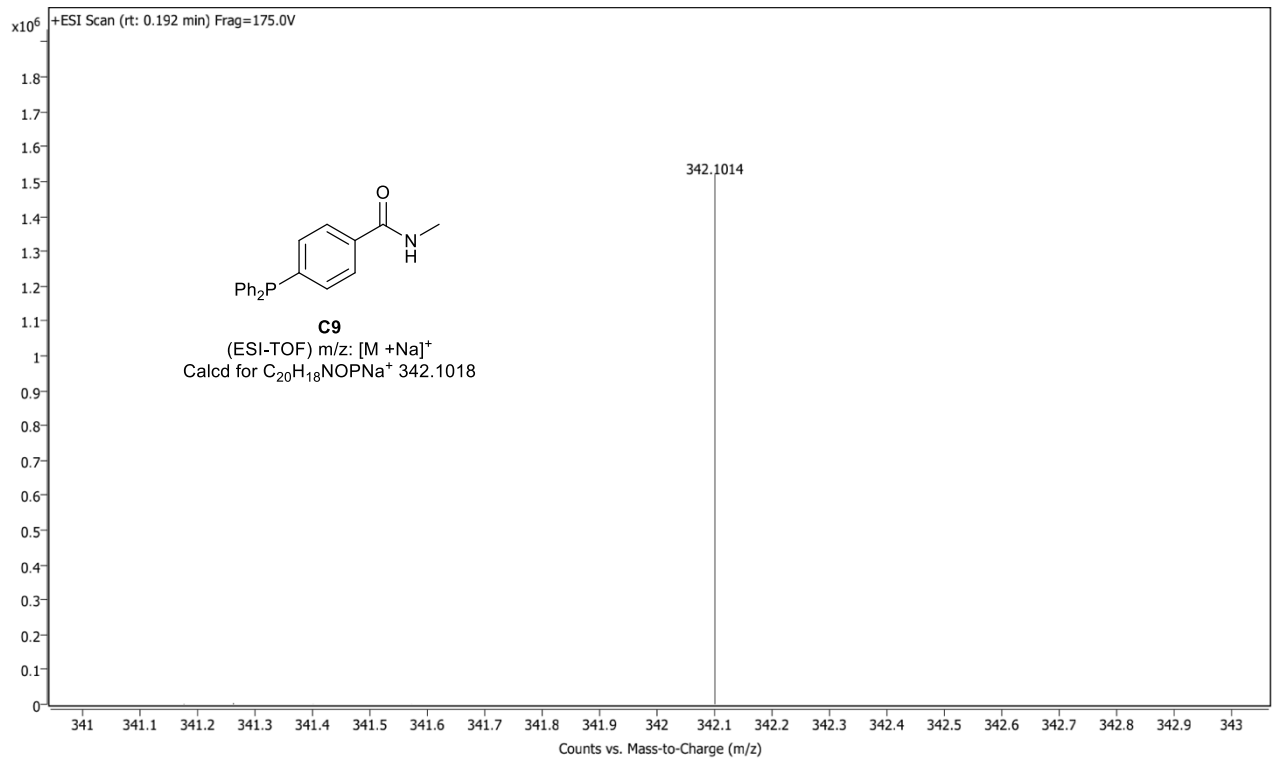

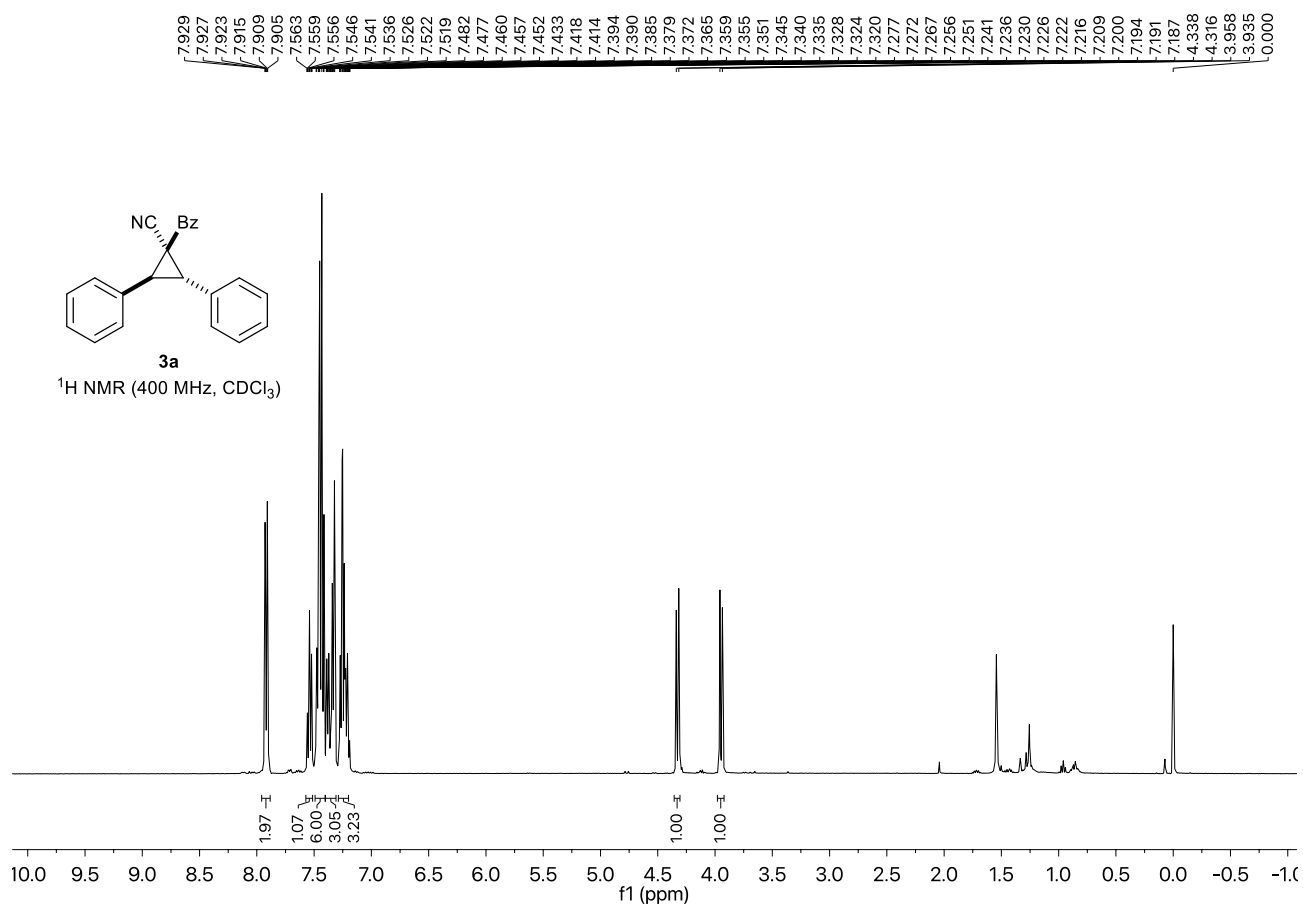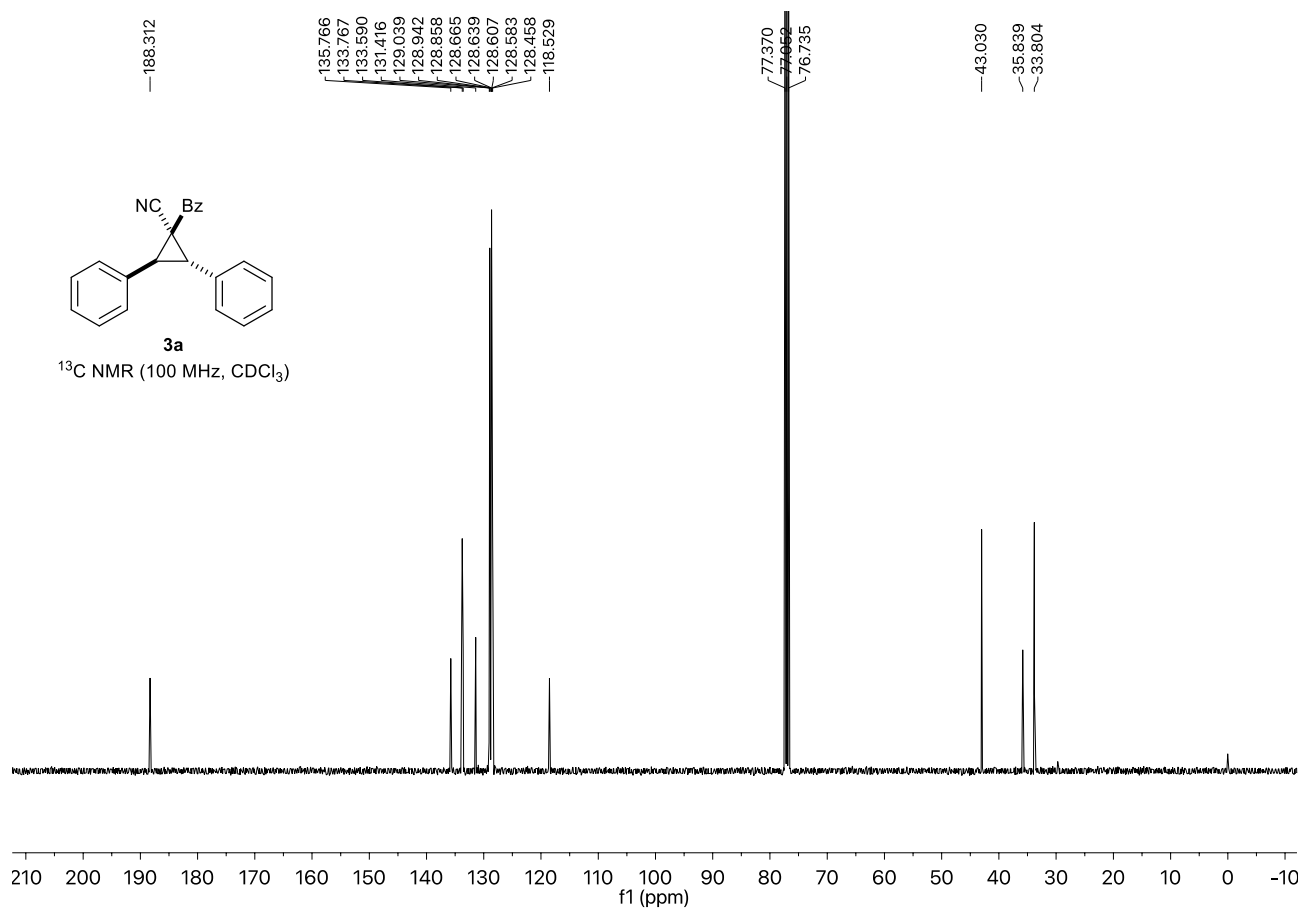

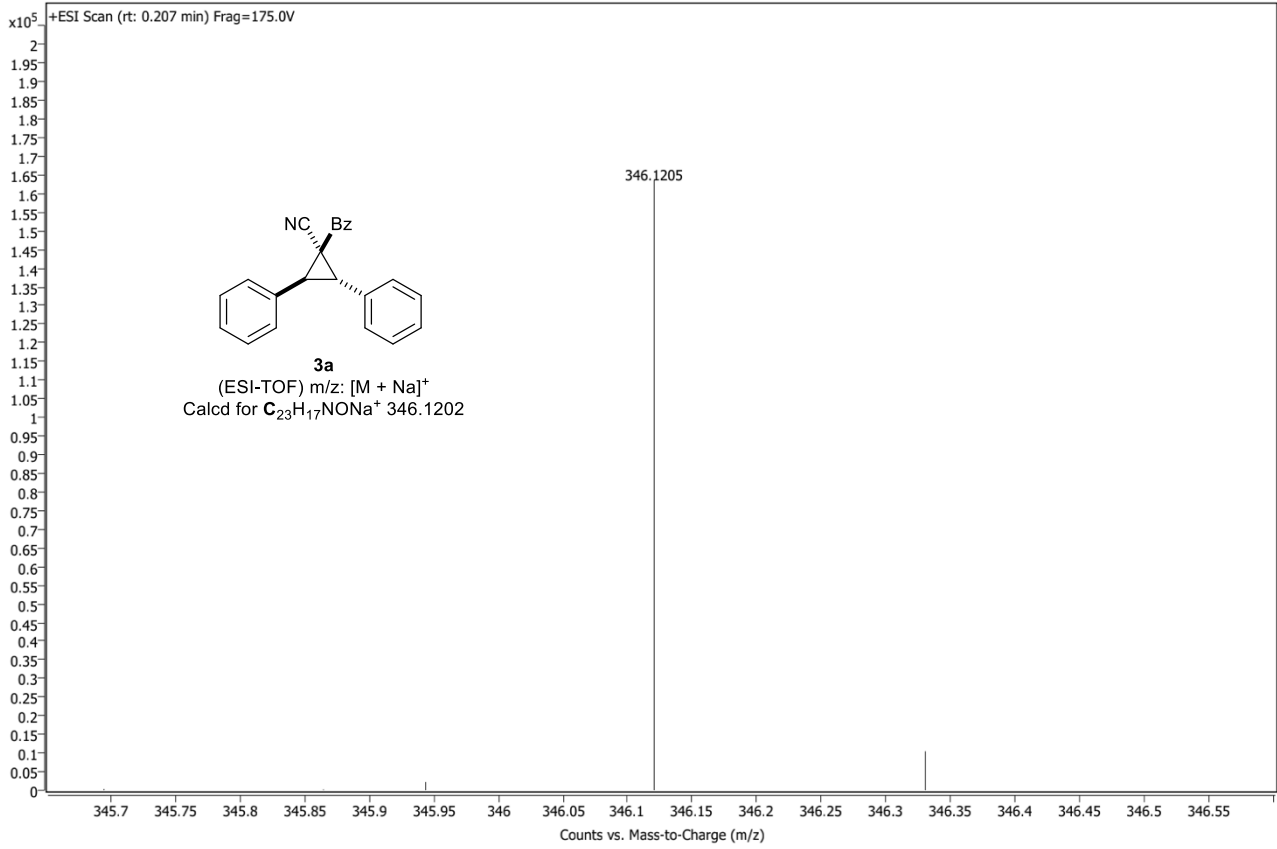

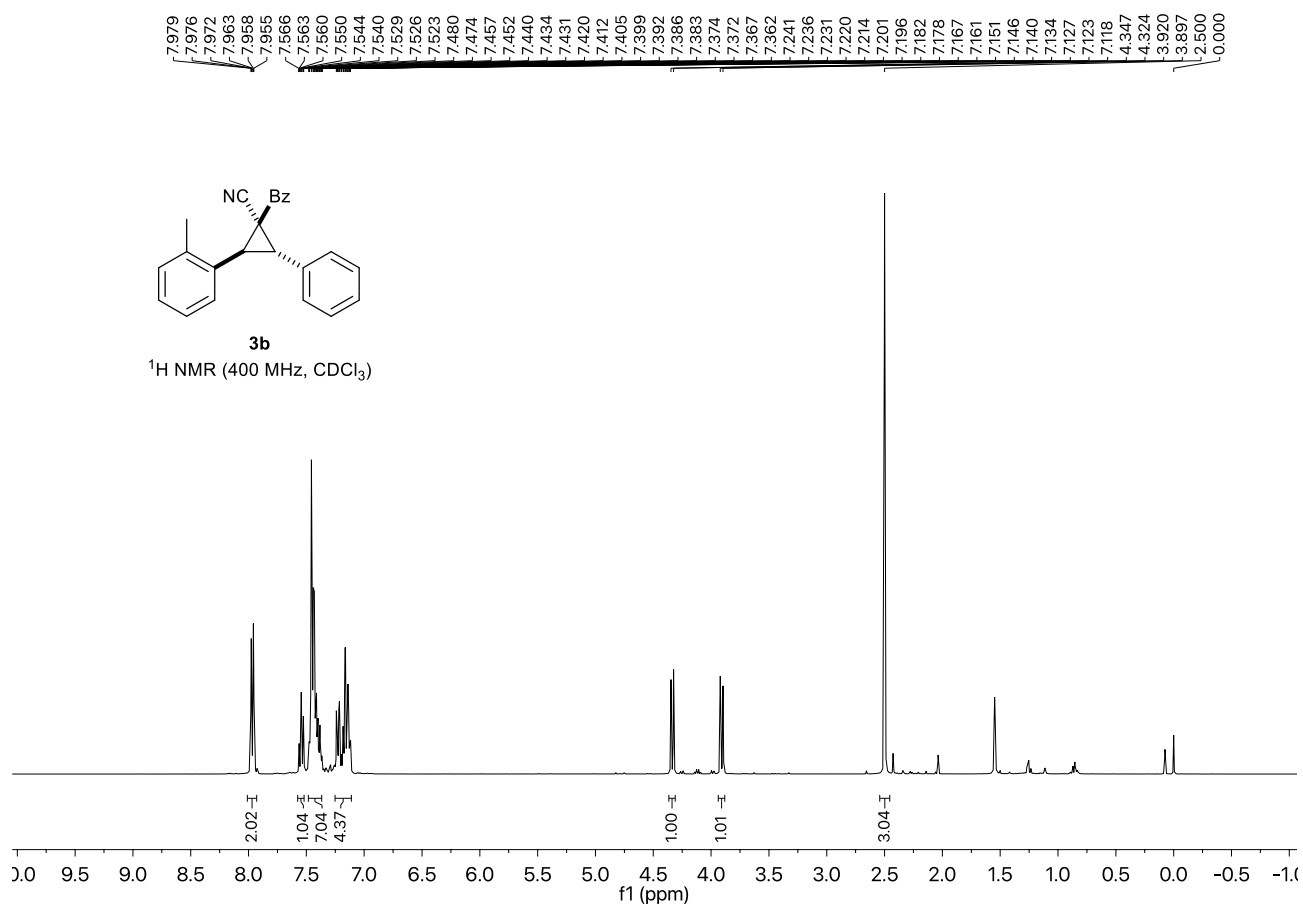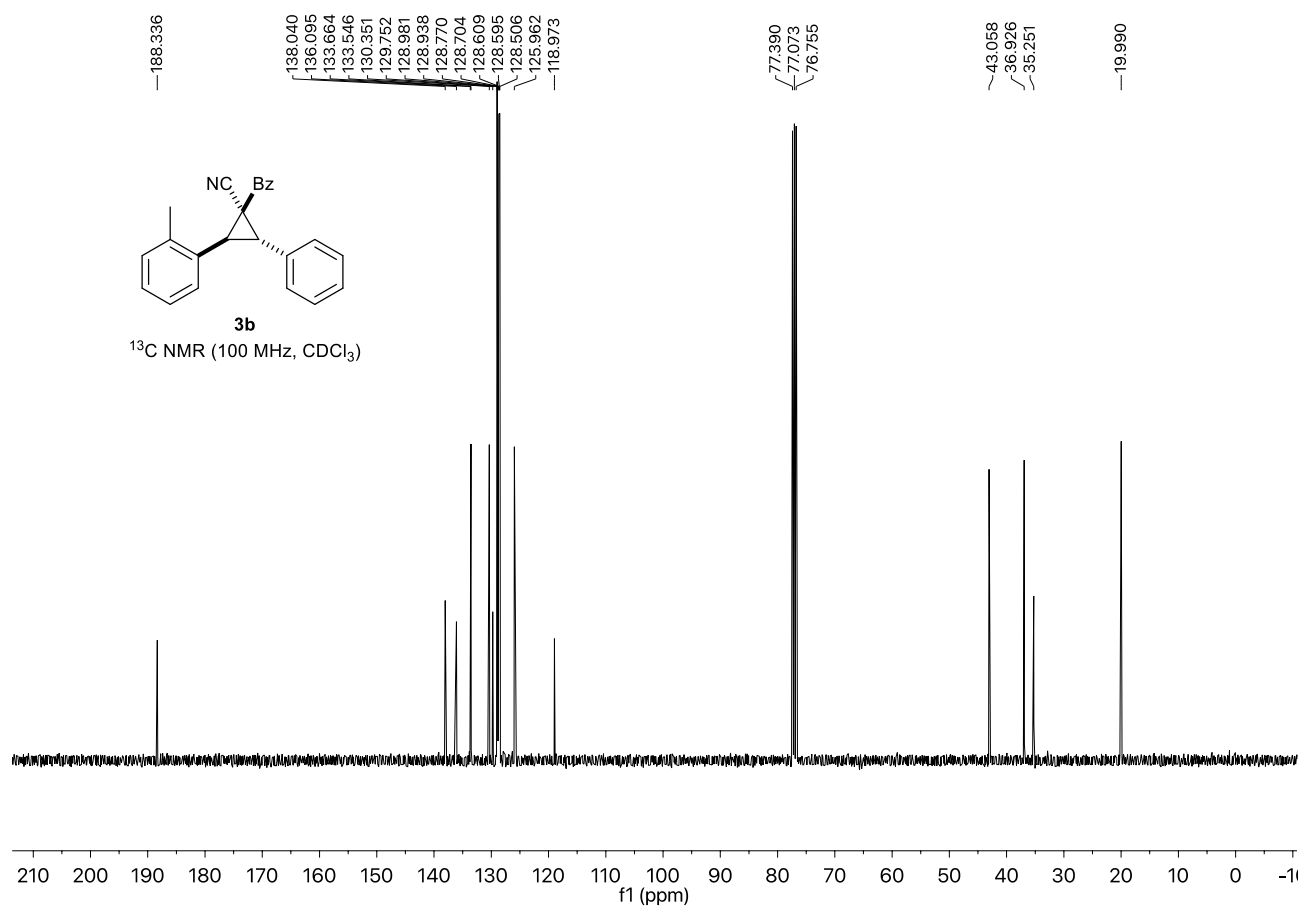



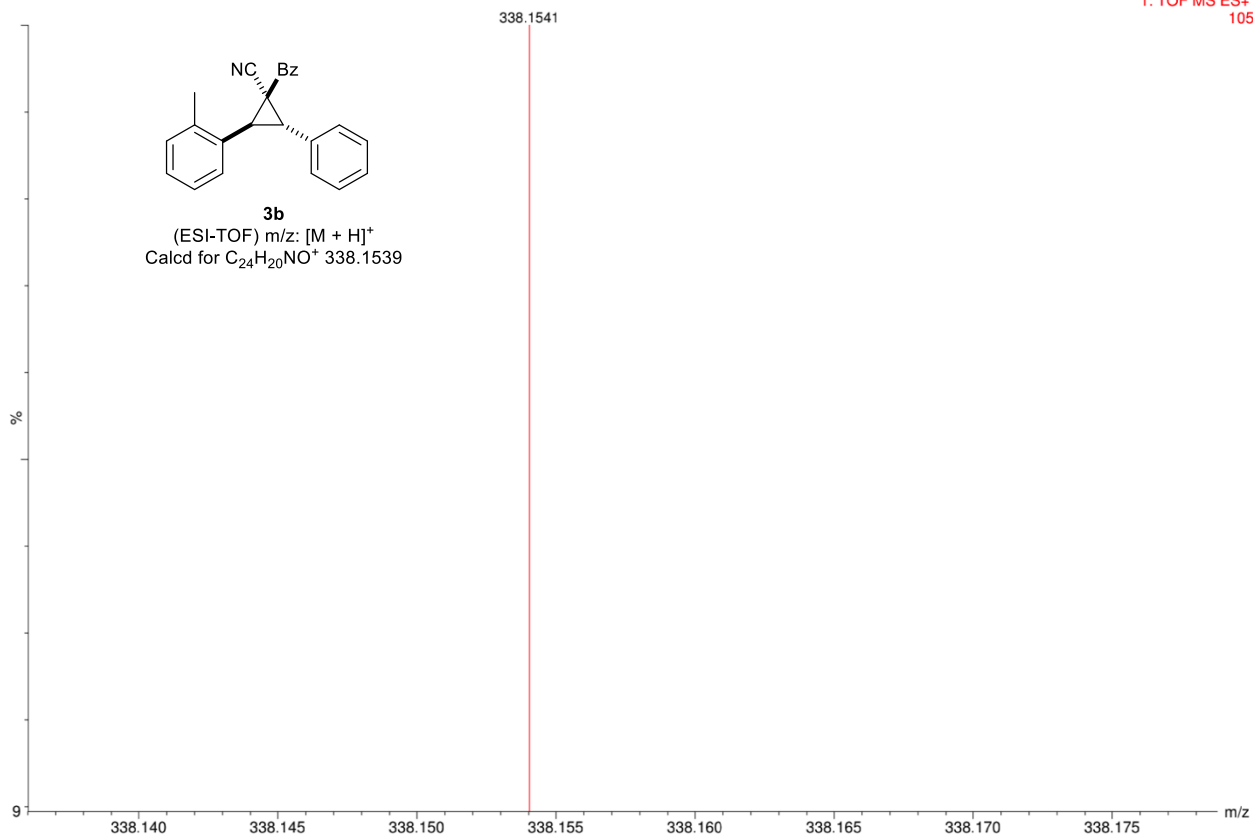

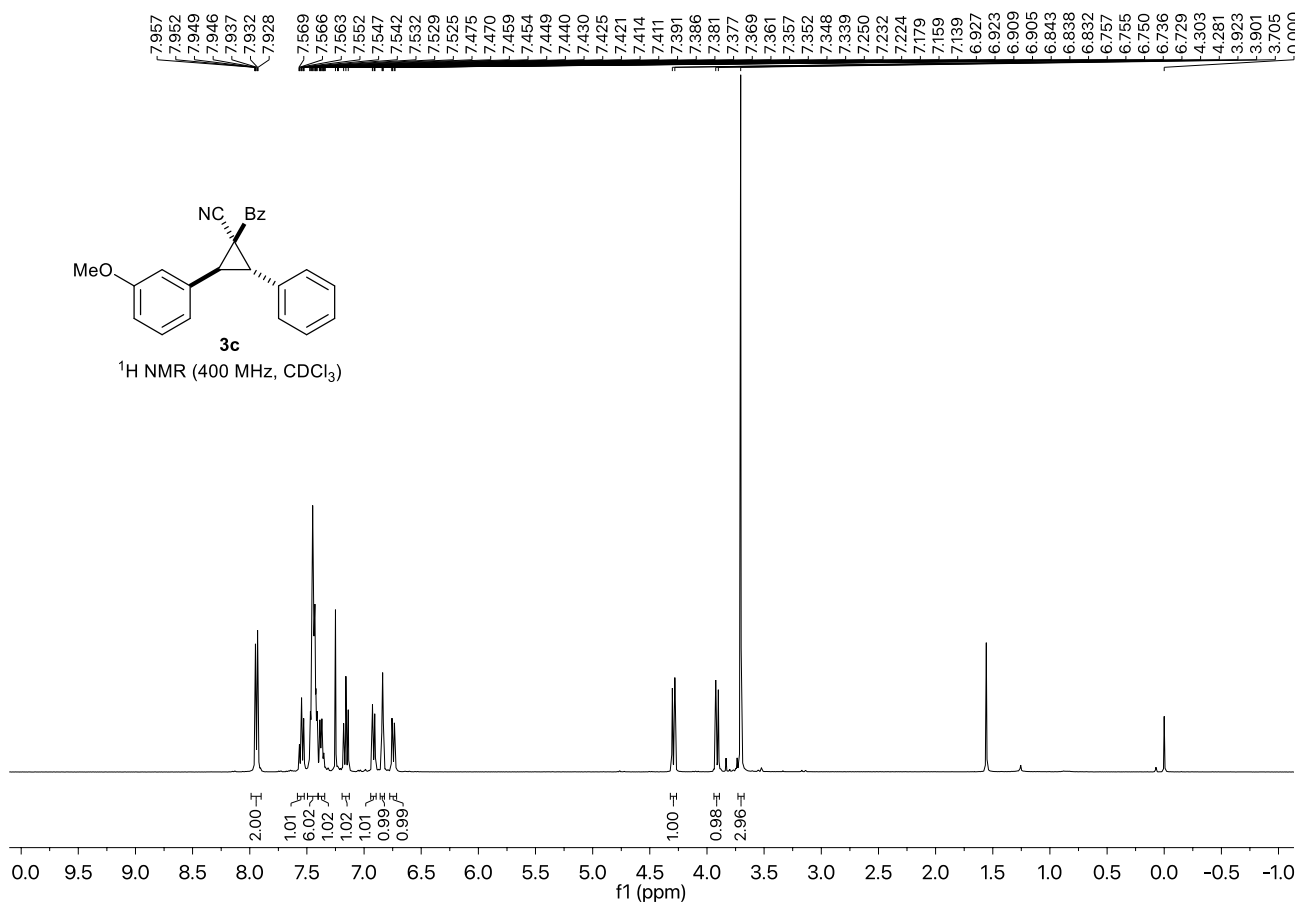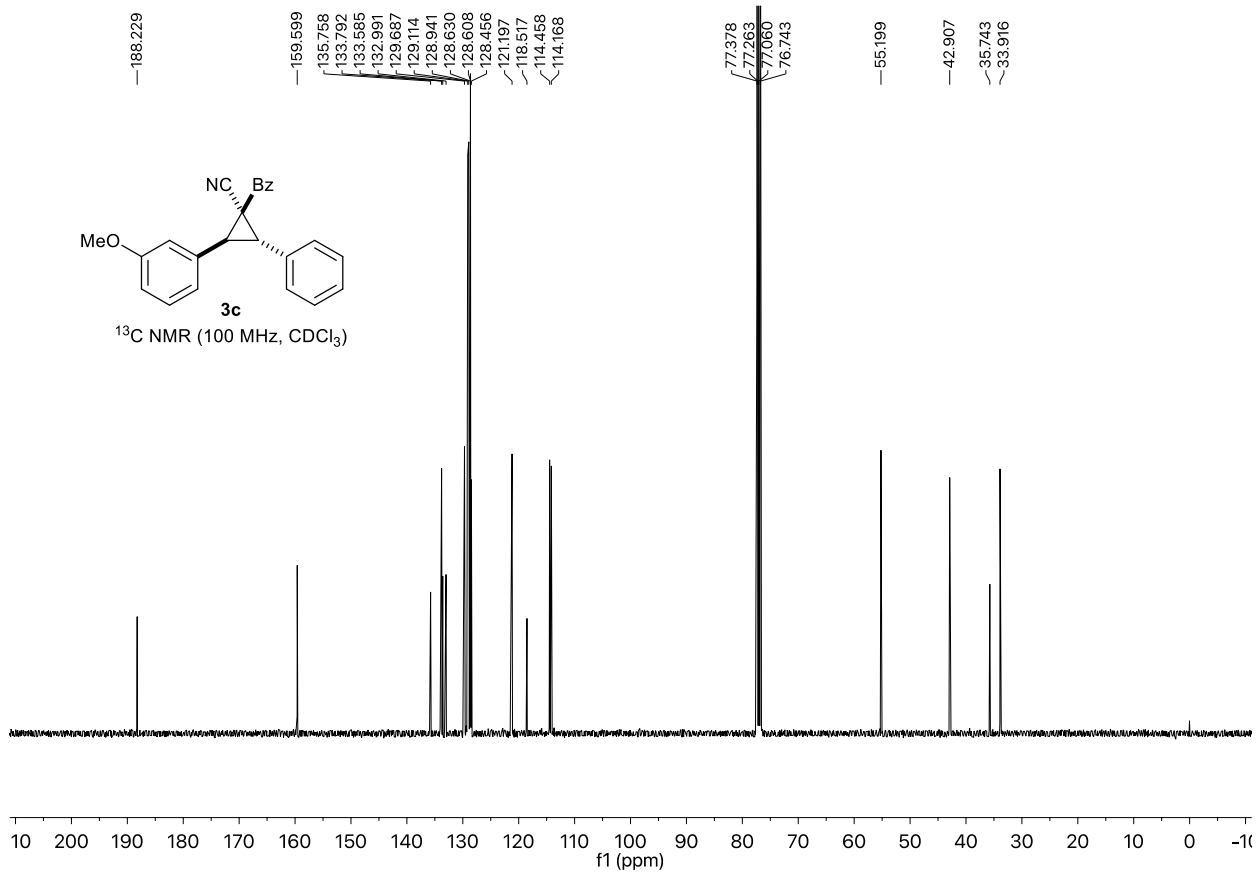

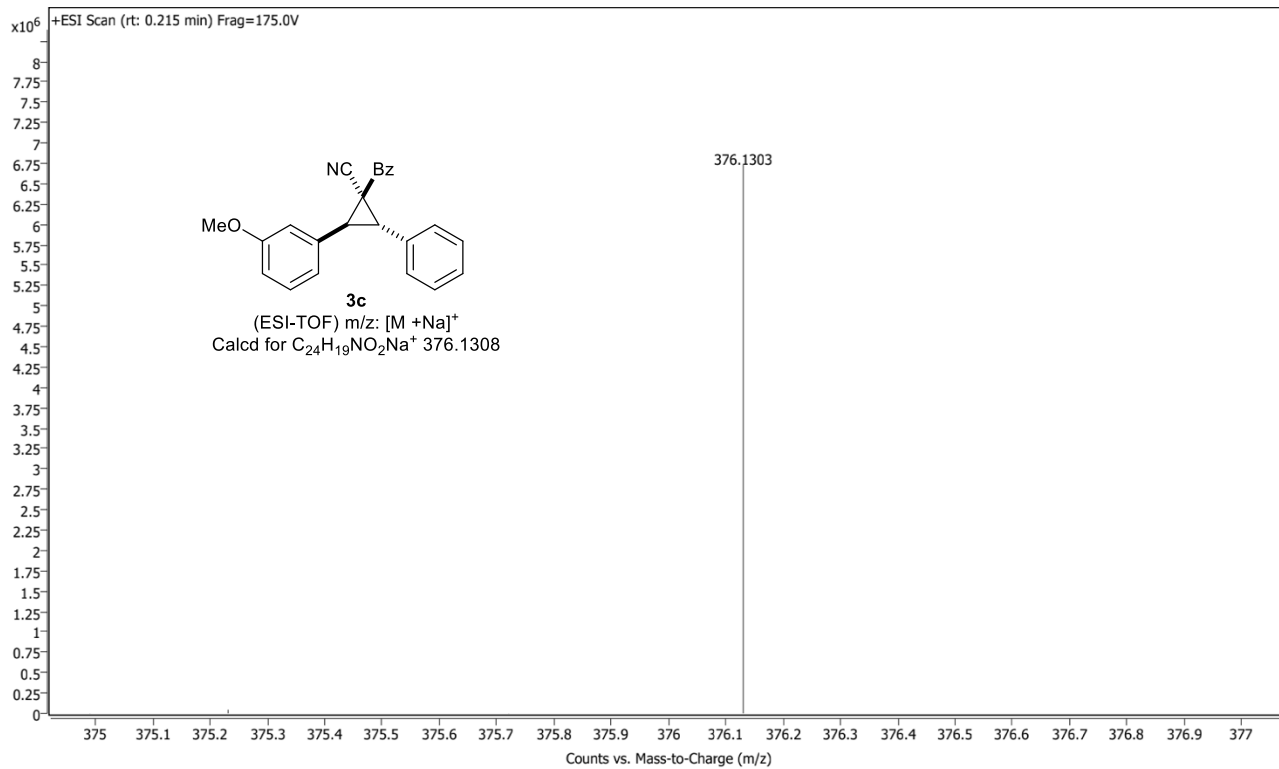

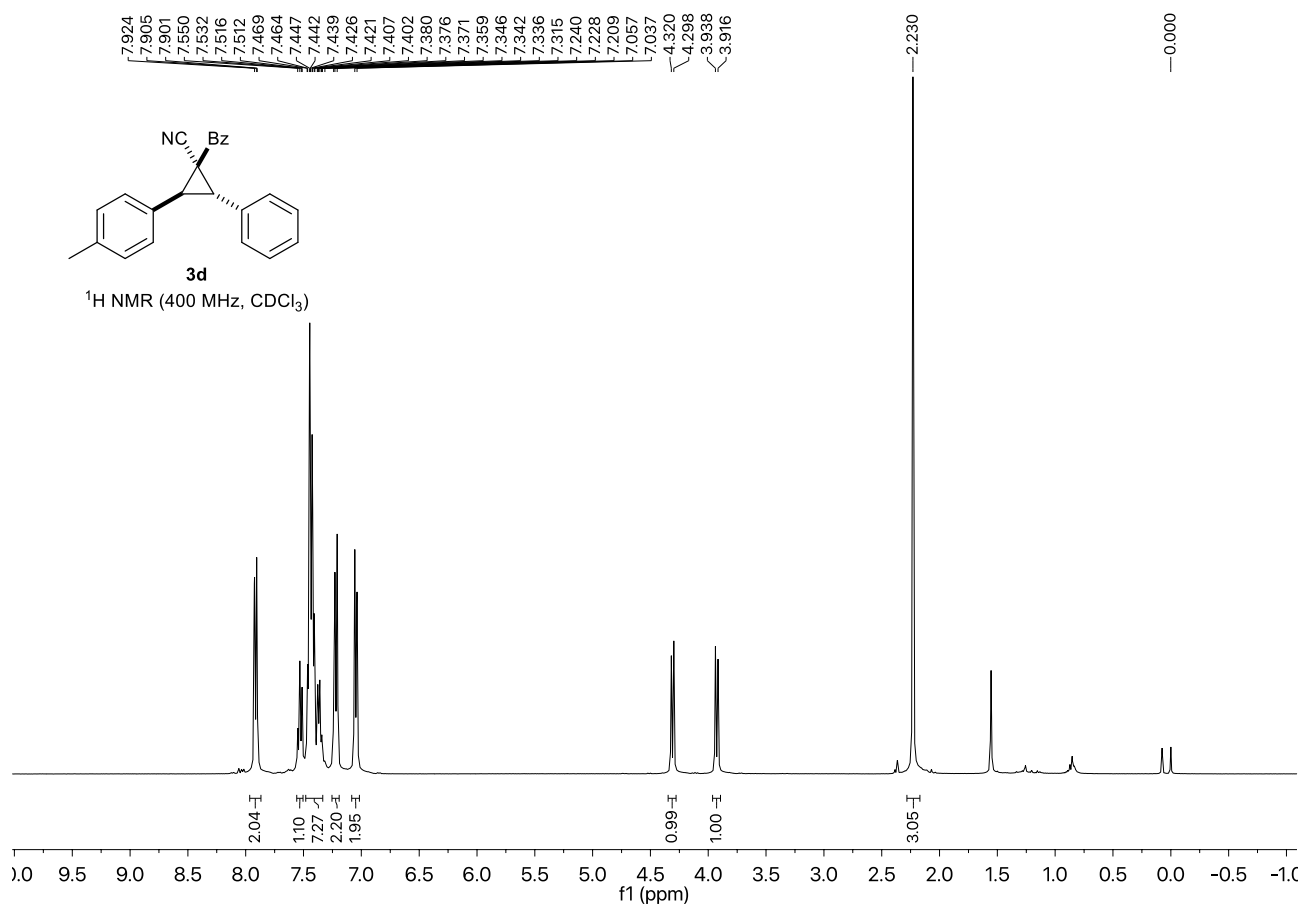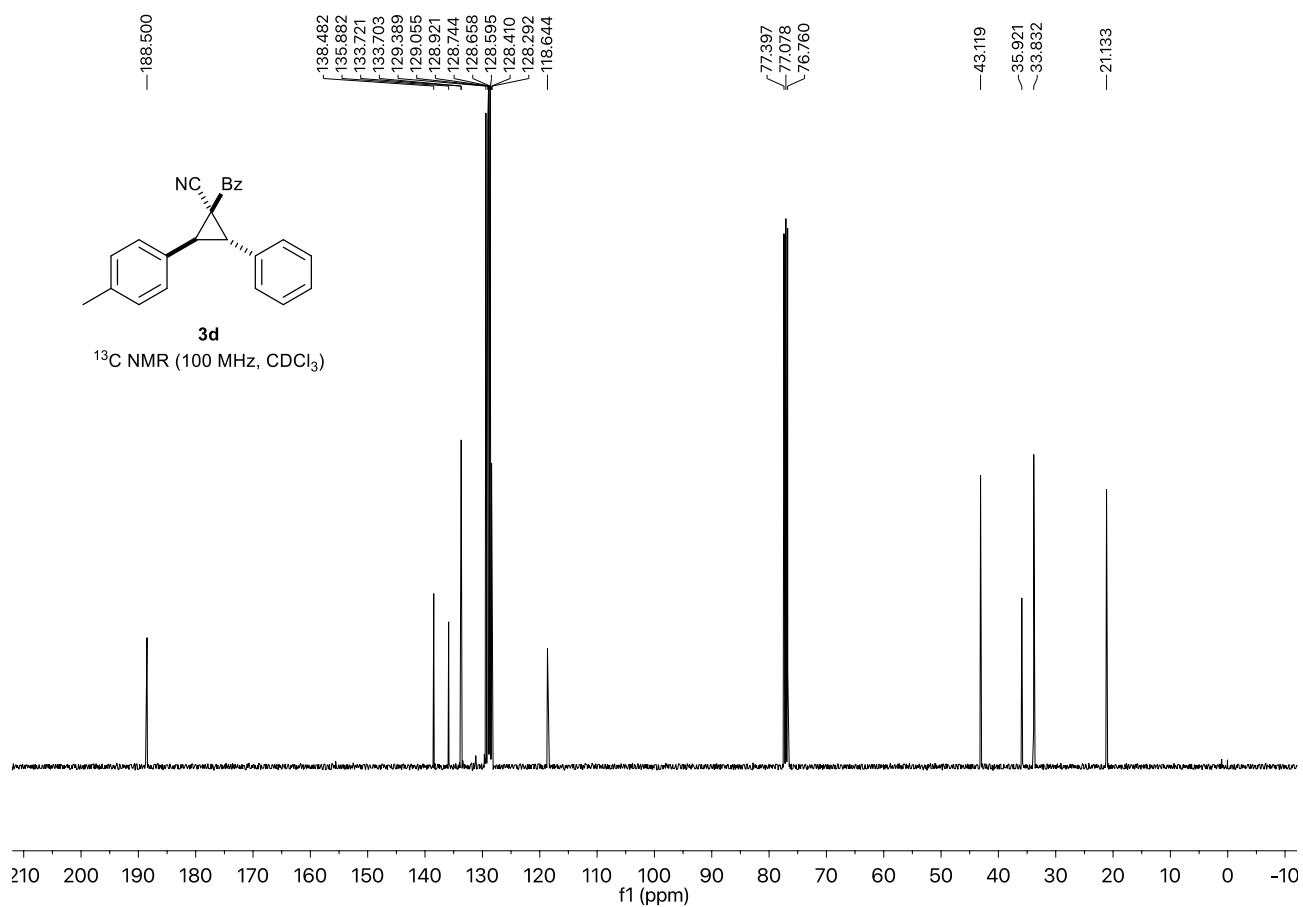

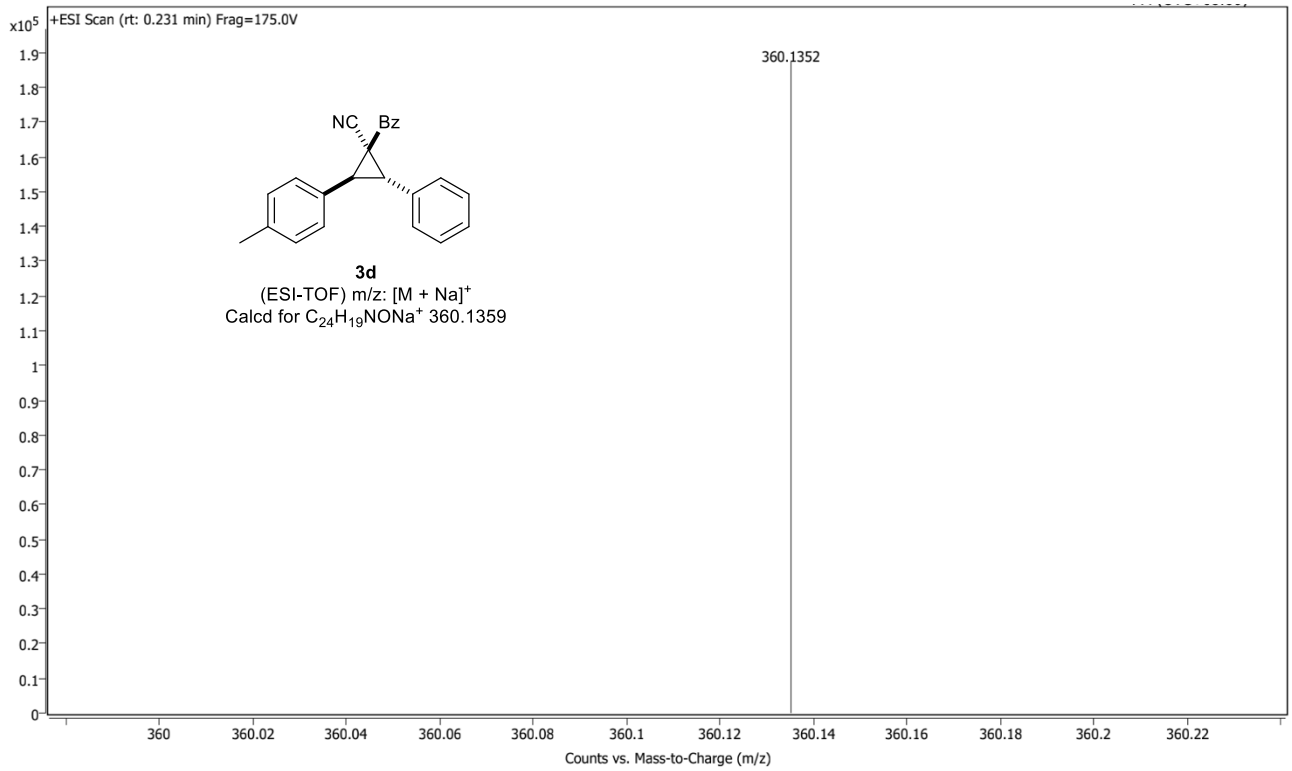

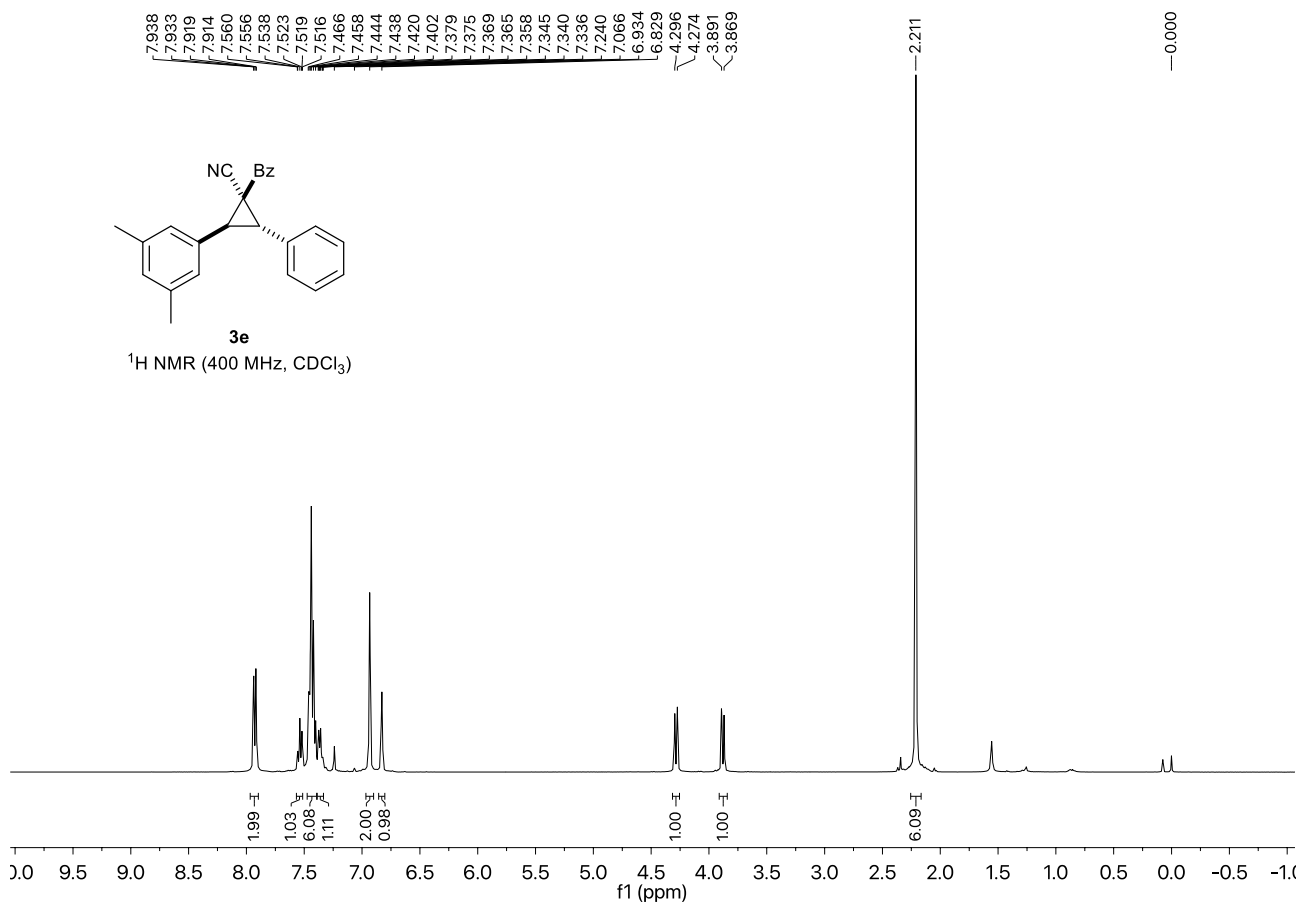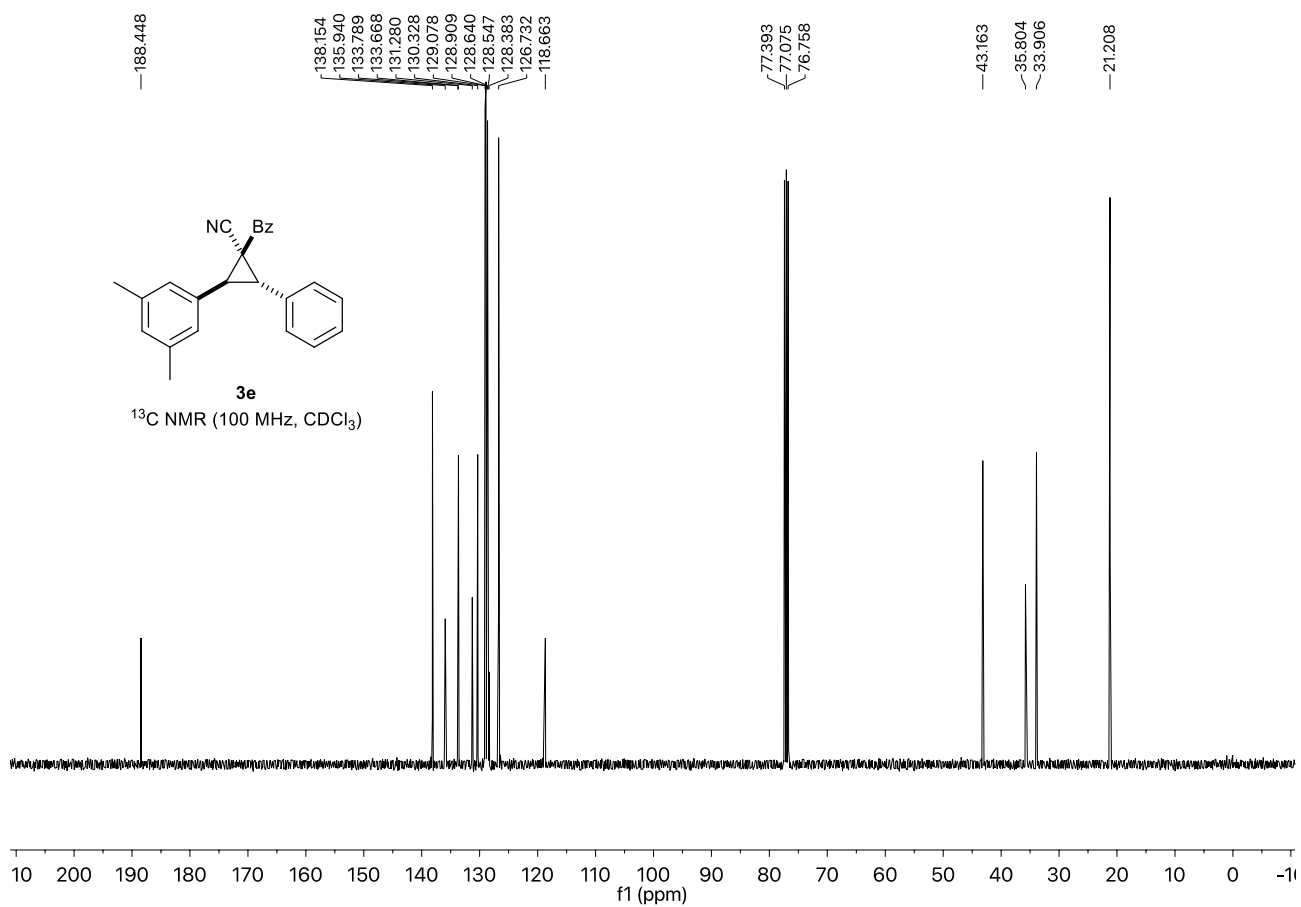

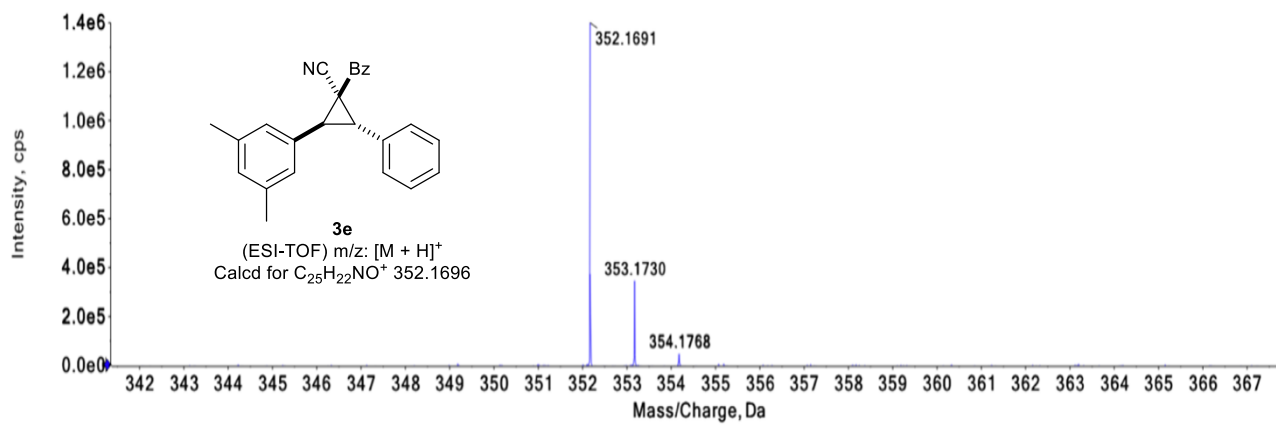

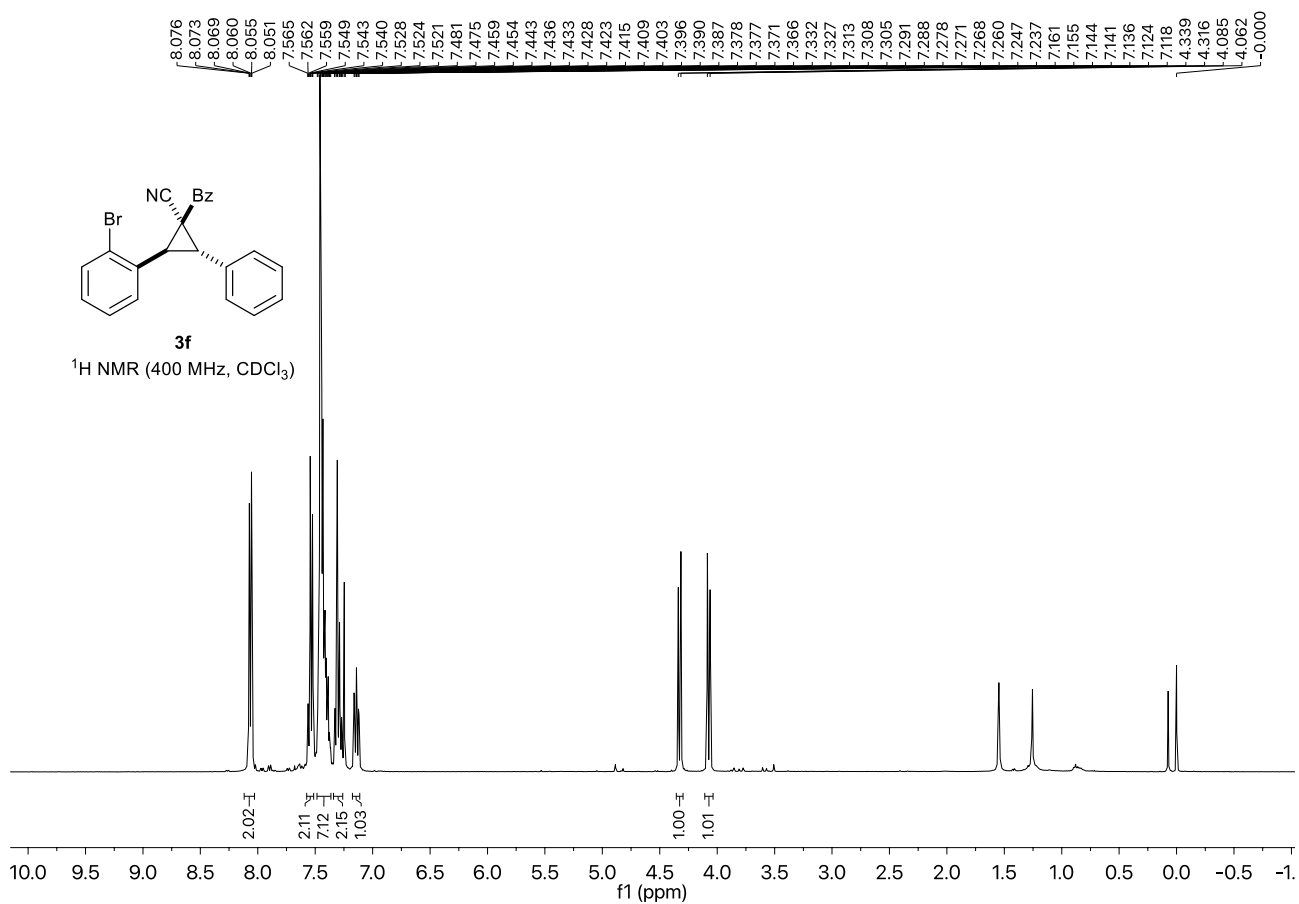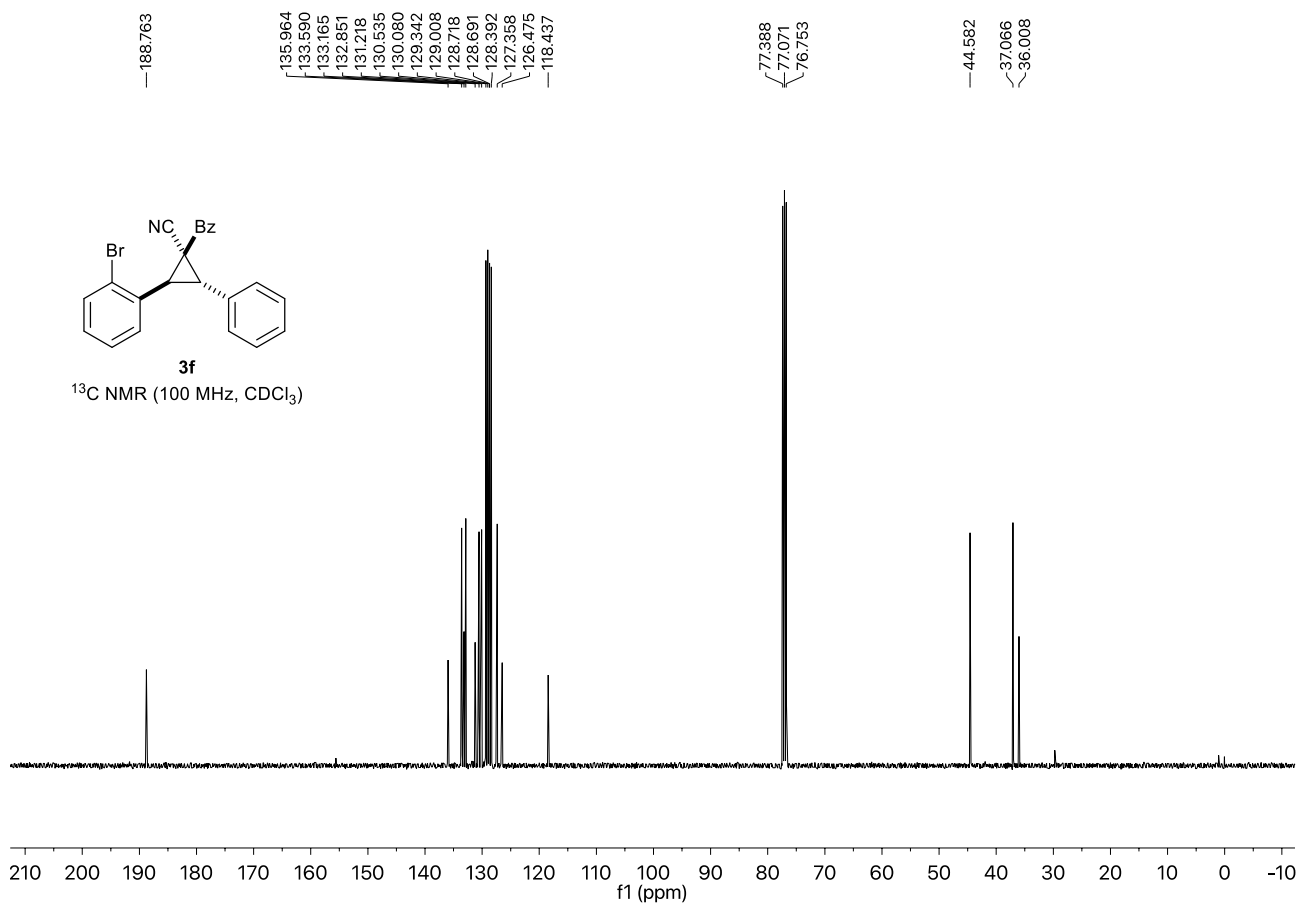



1: TOF MS ES+  
4.62e3

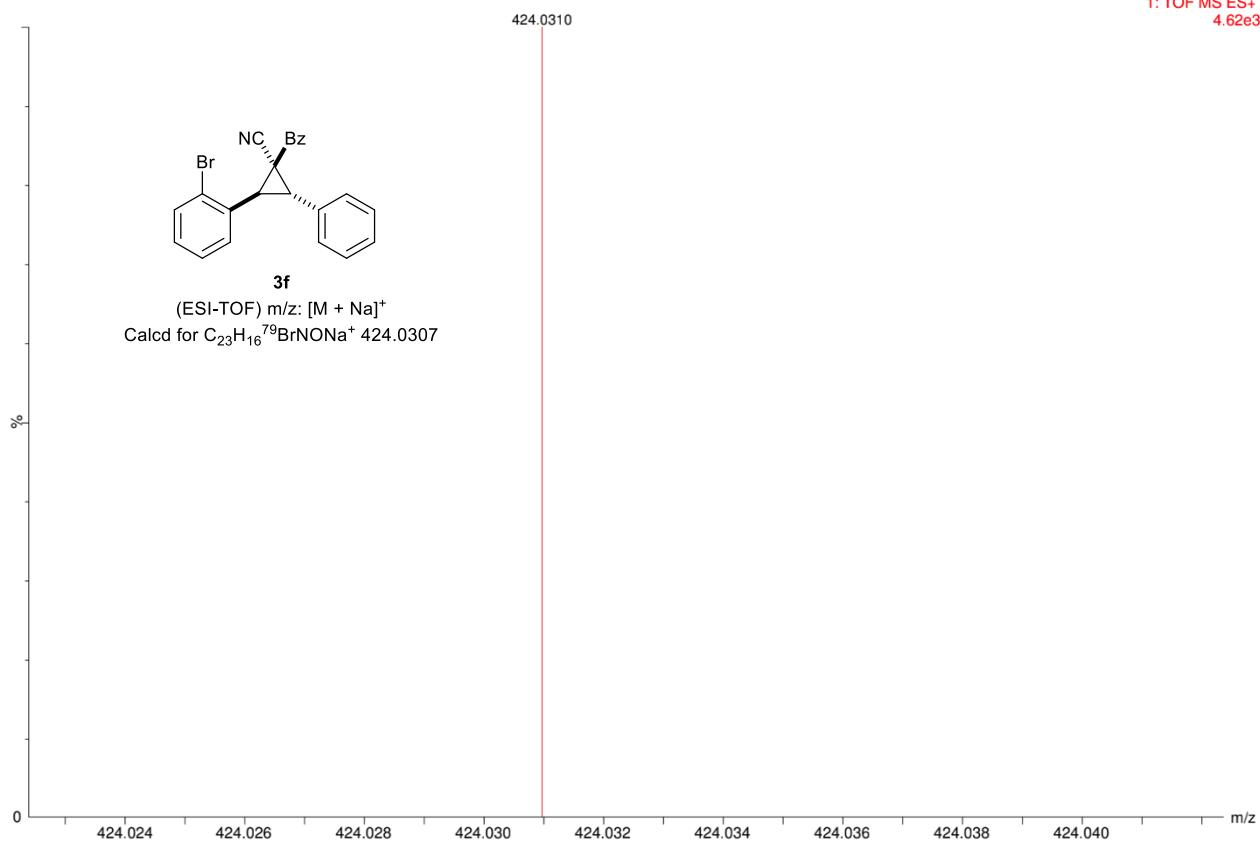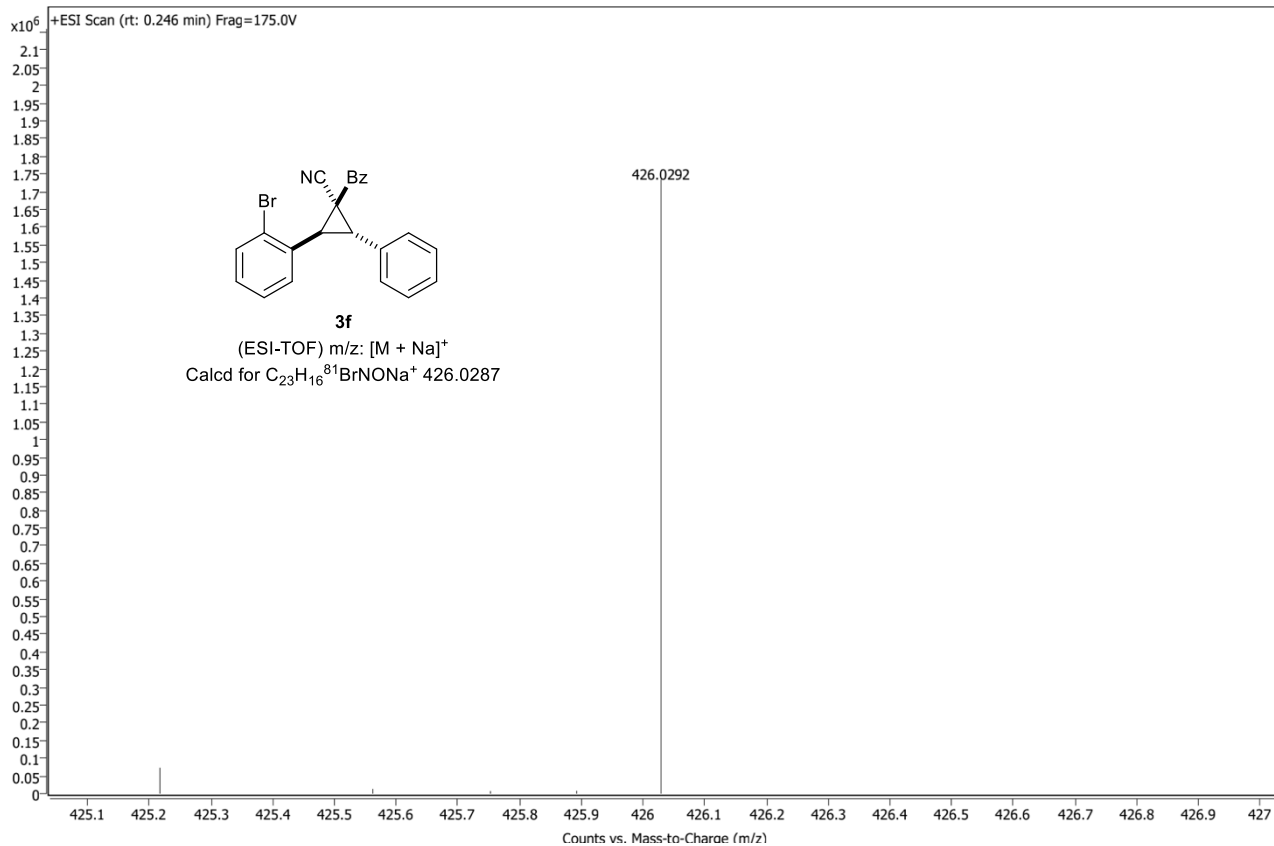

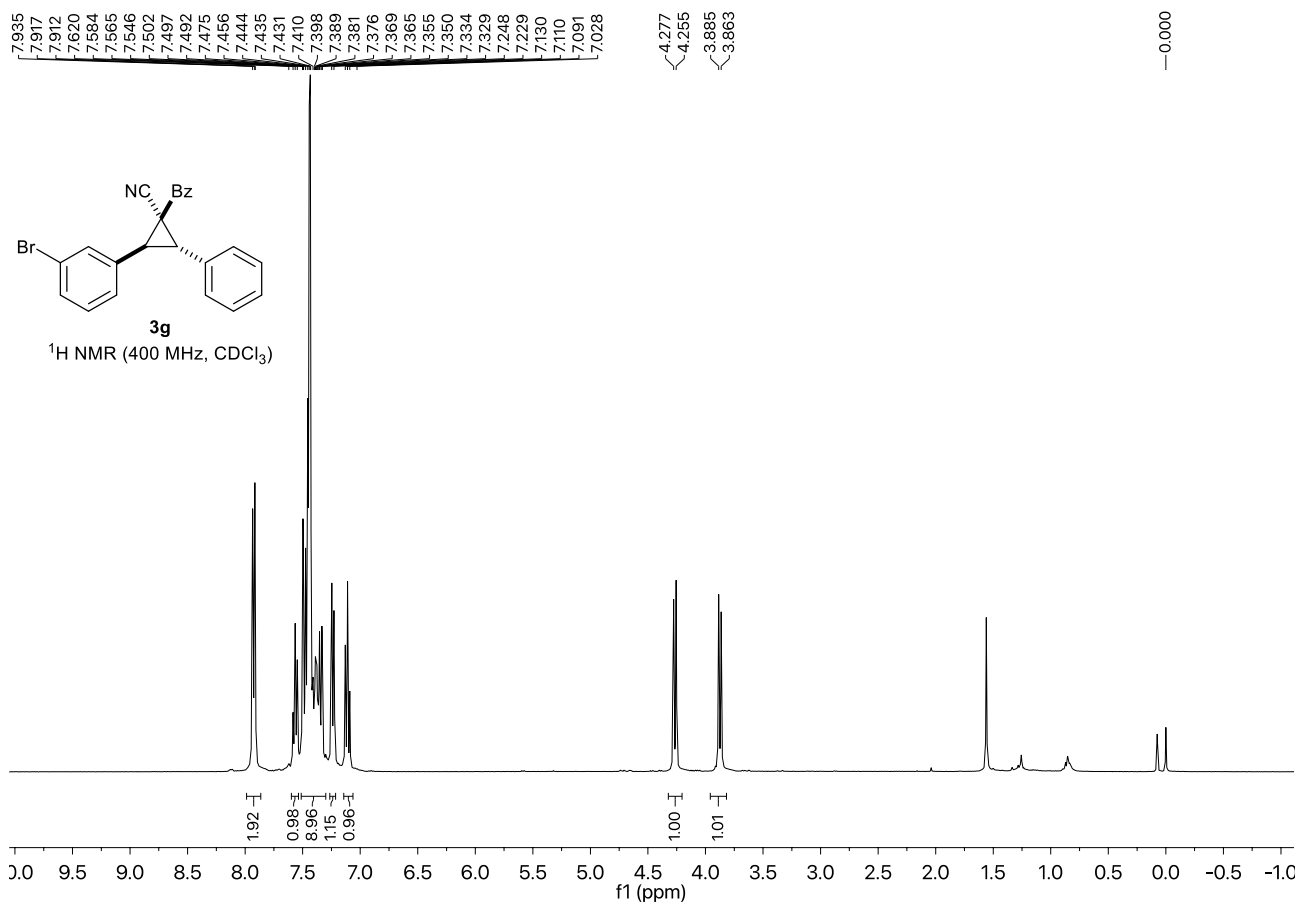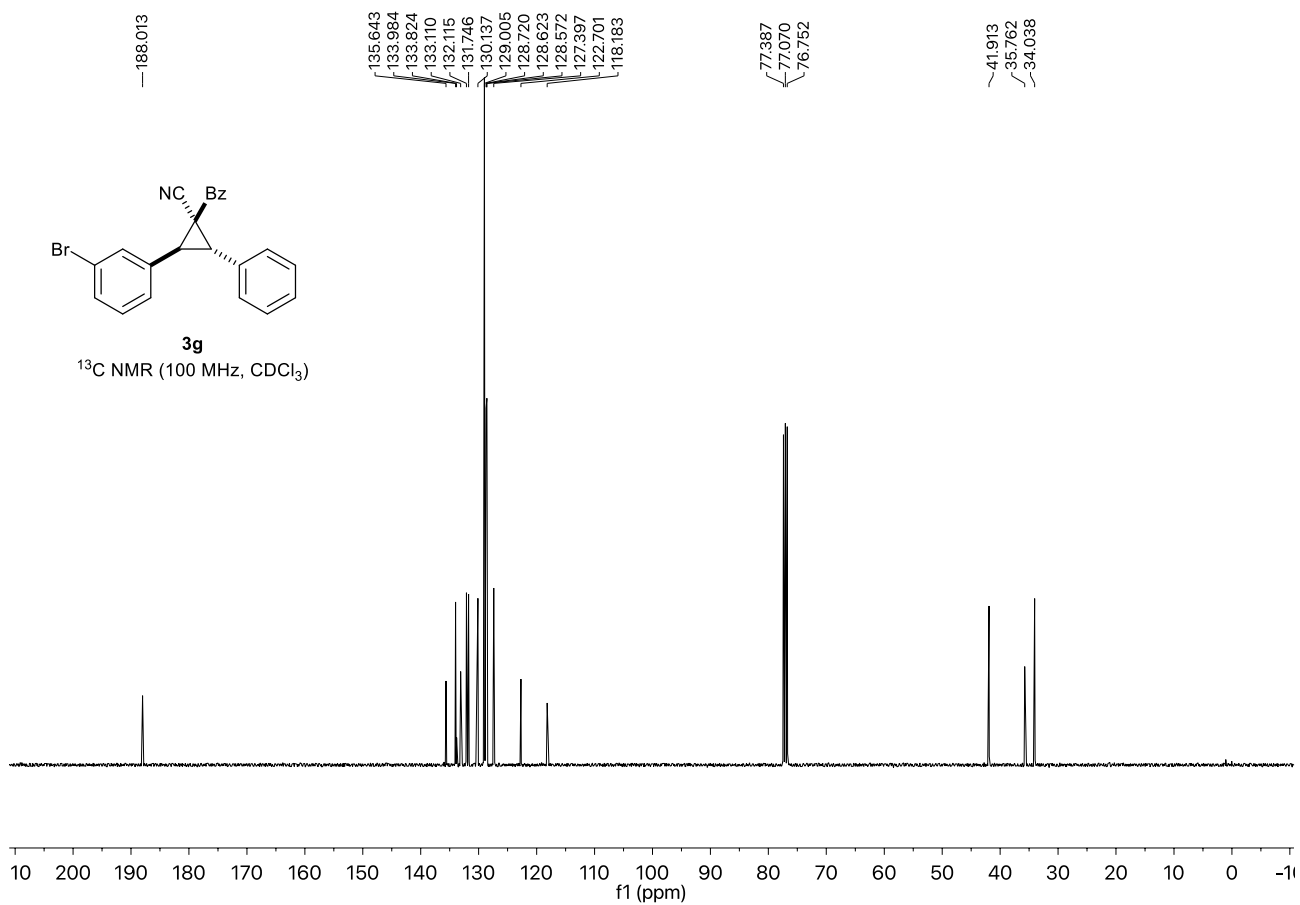

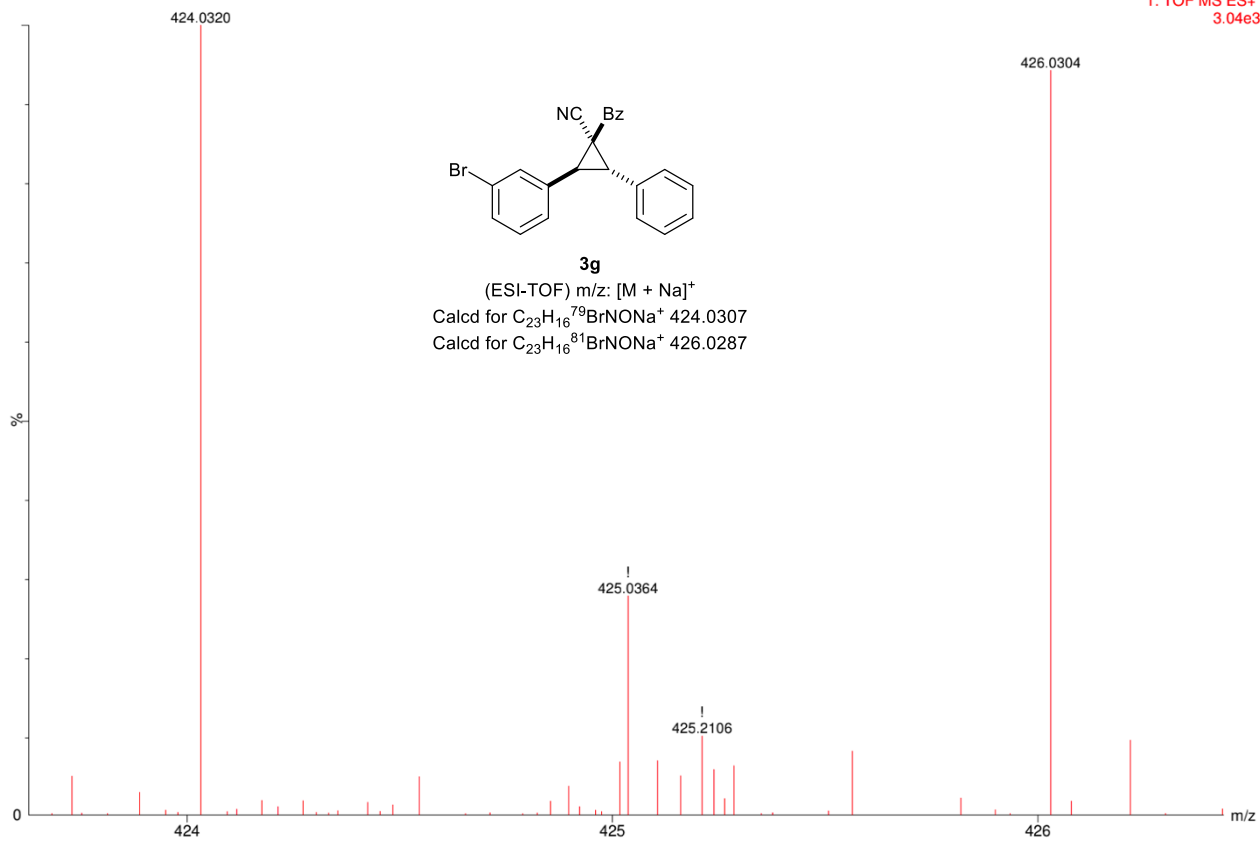

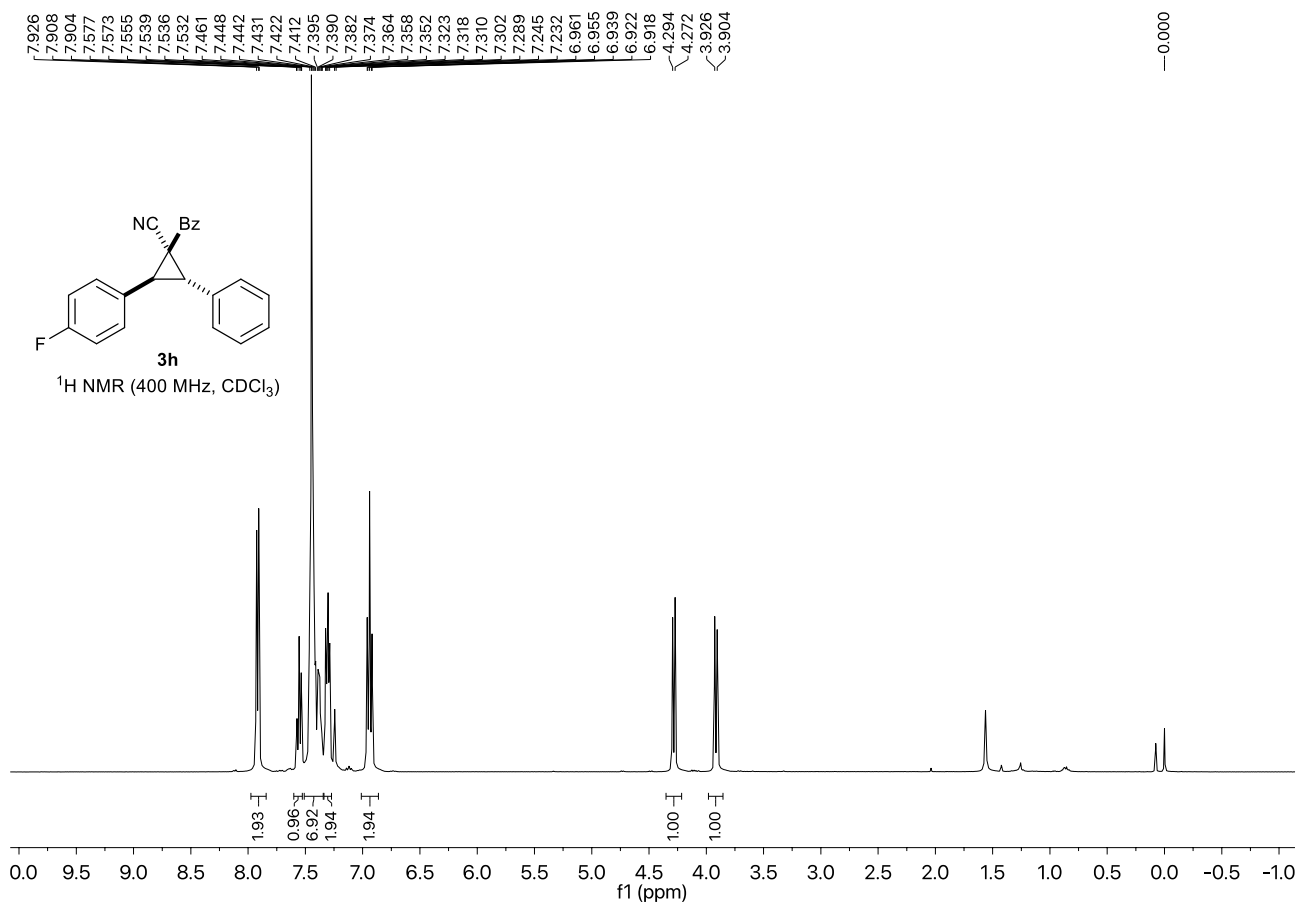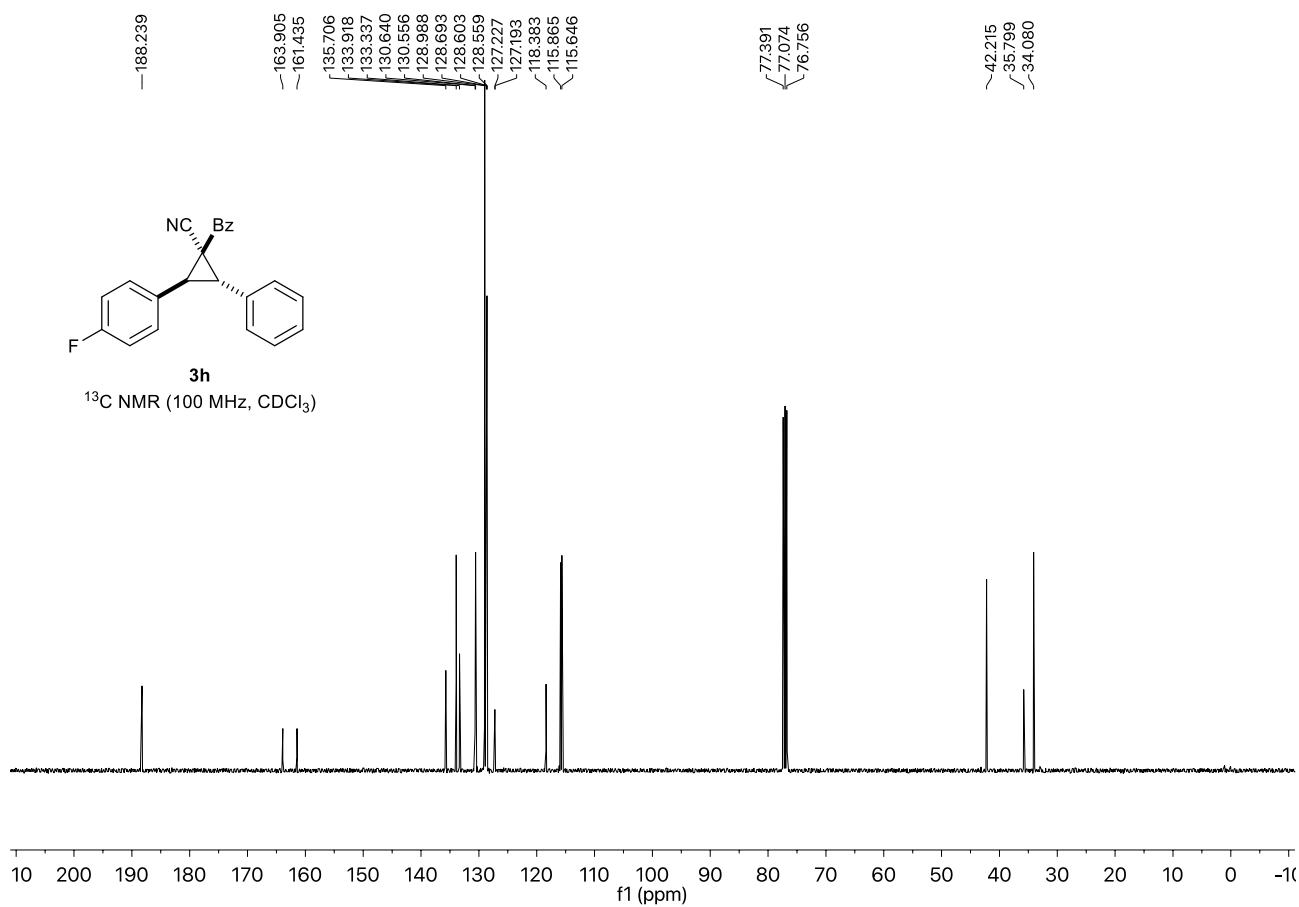

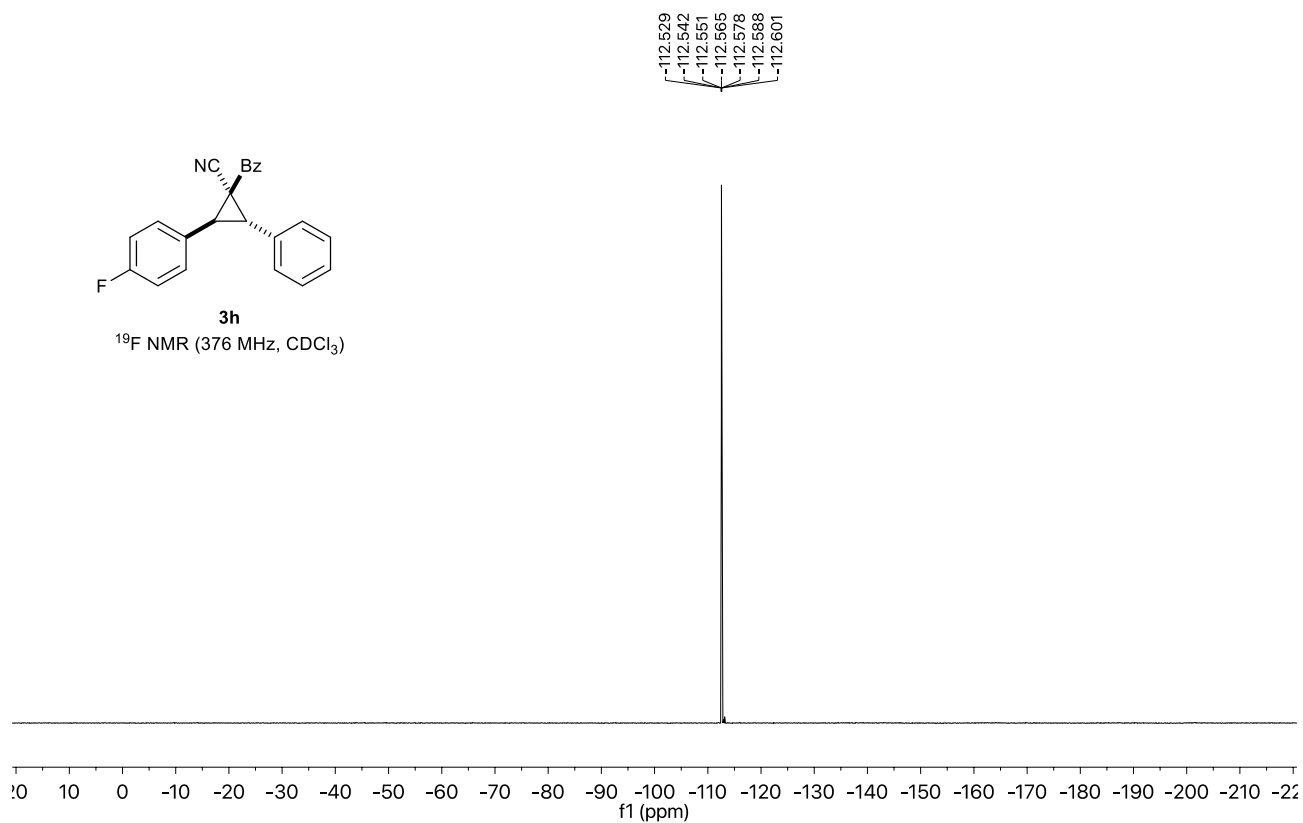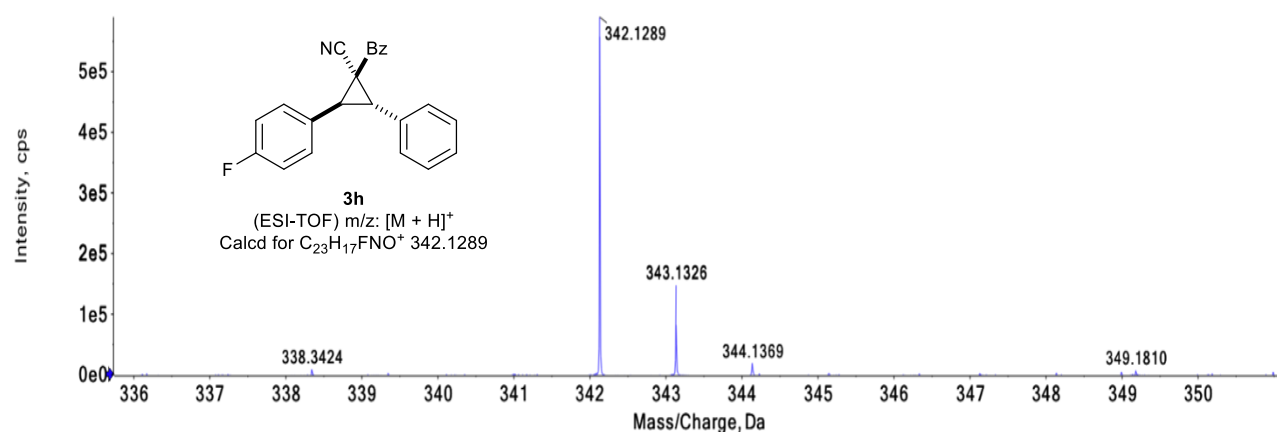

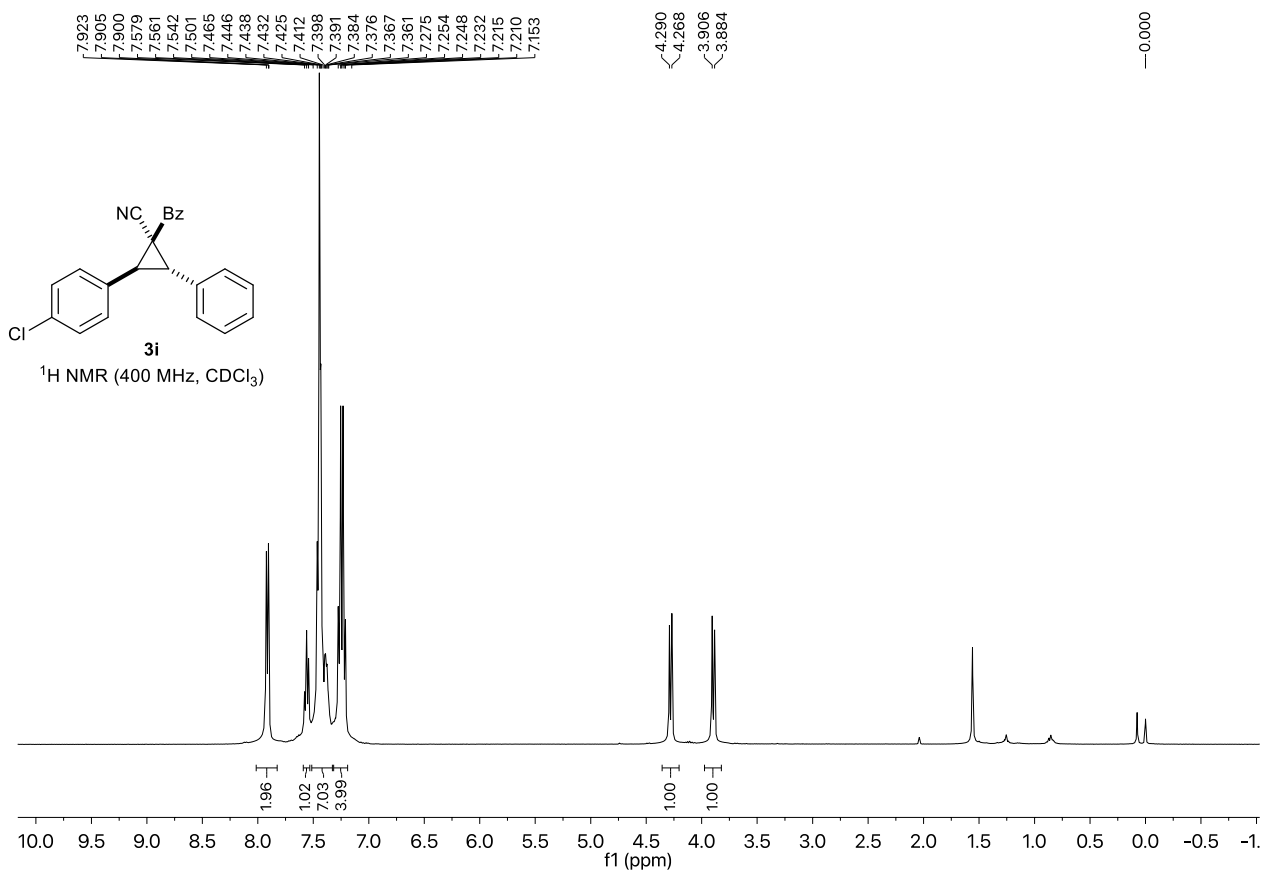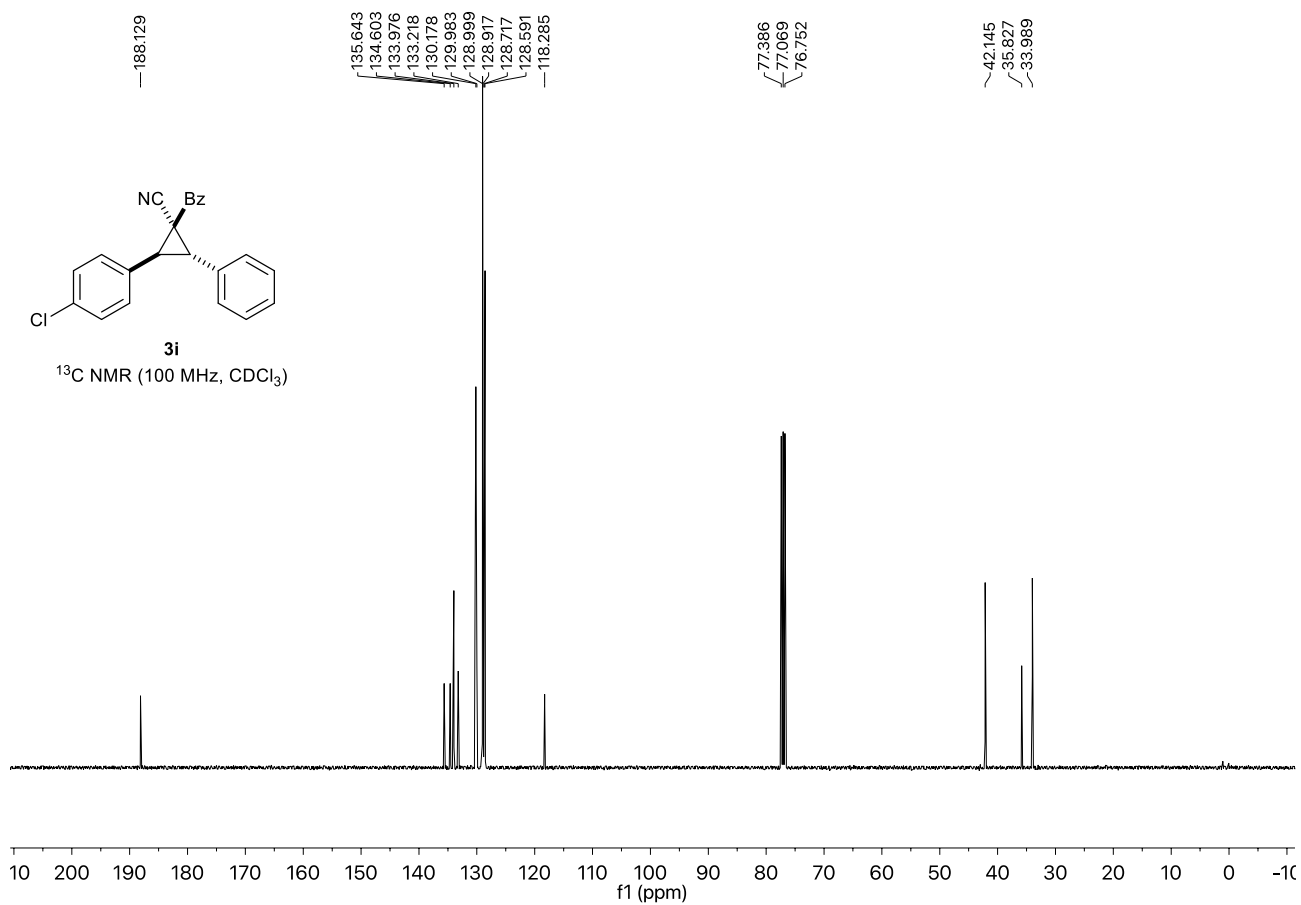

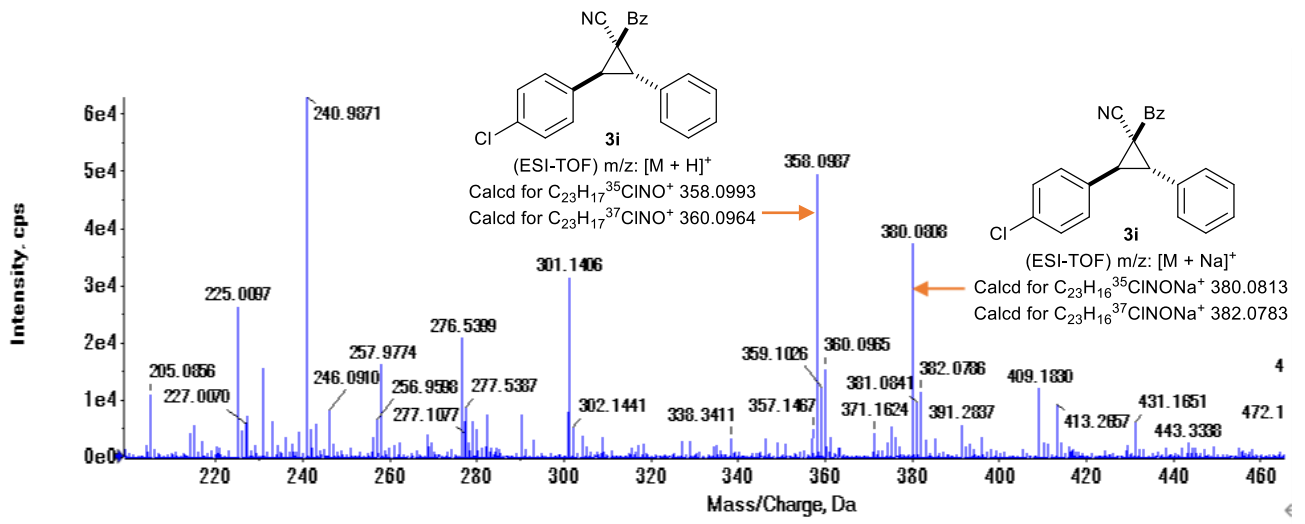

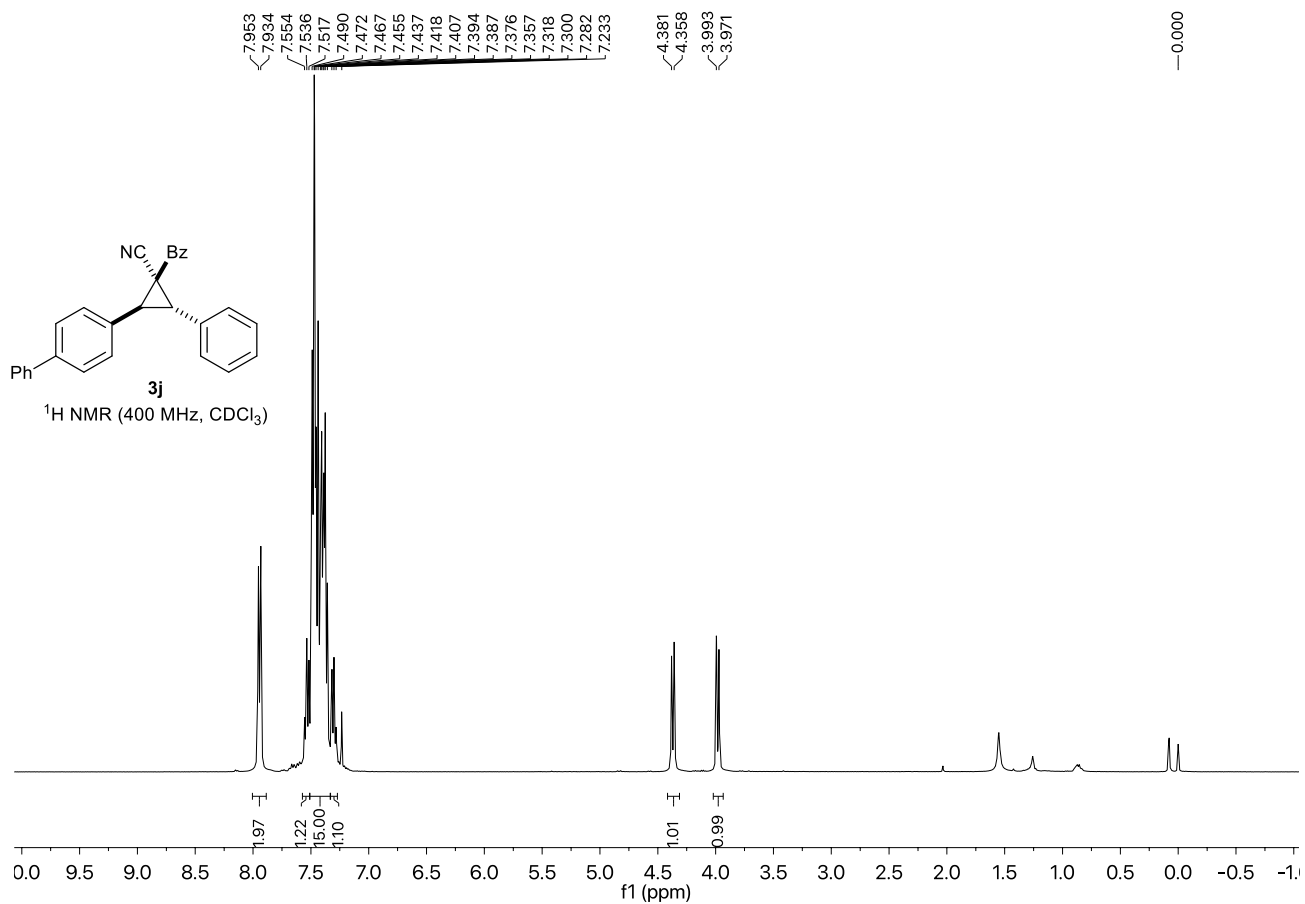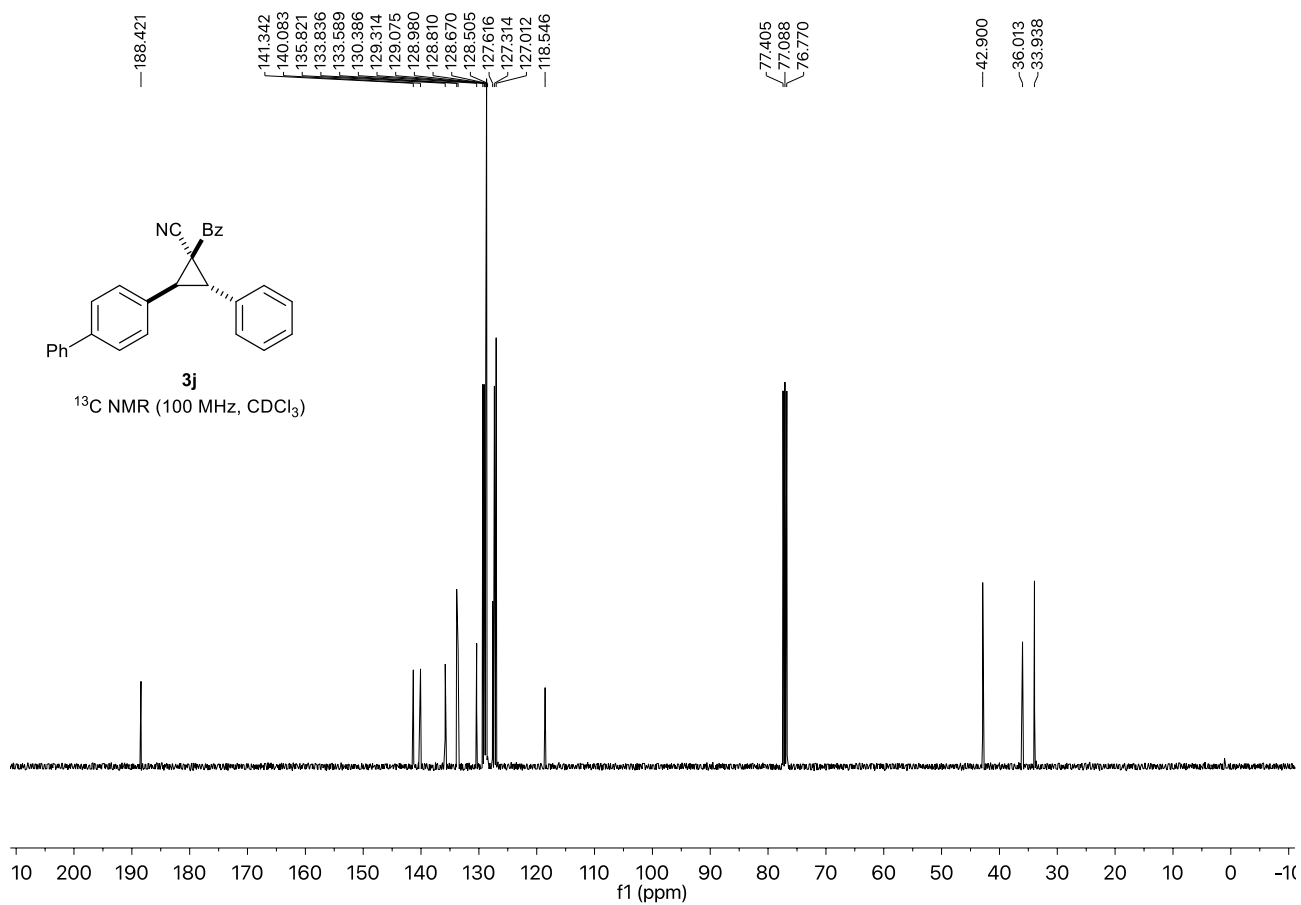



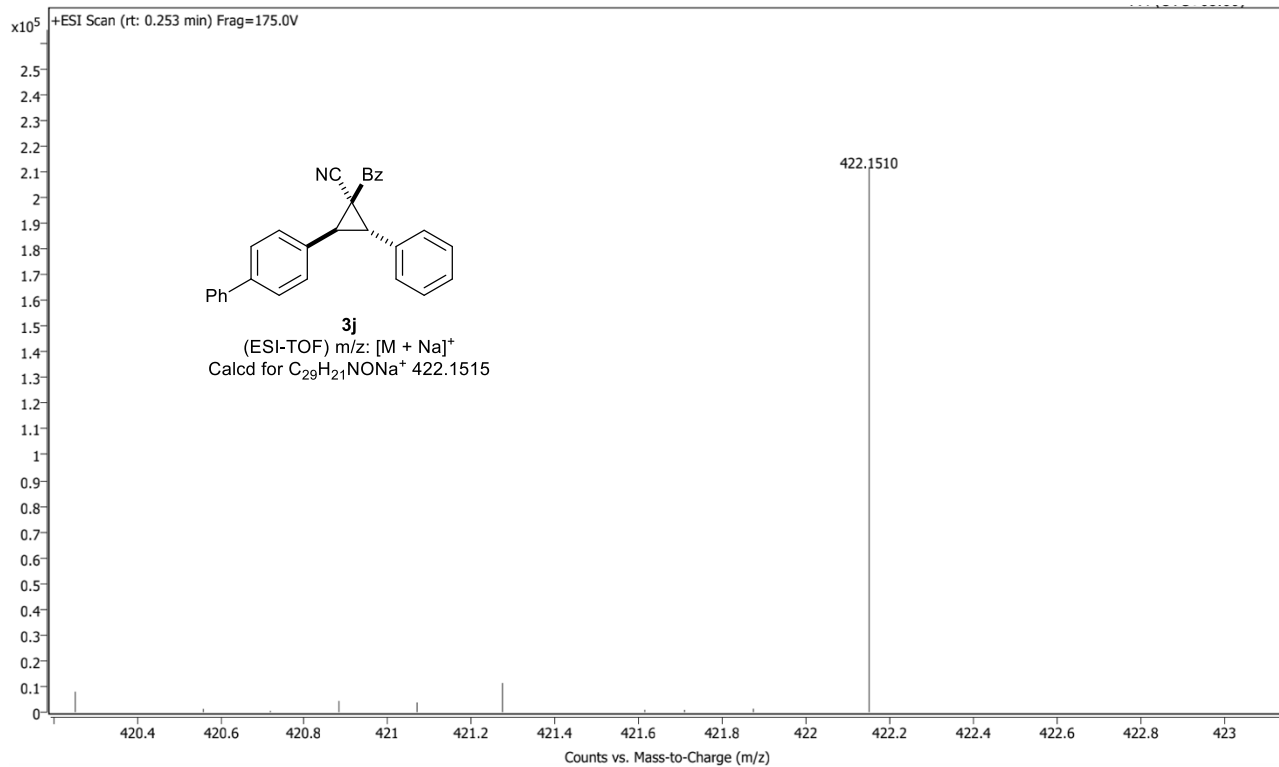

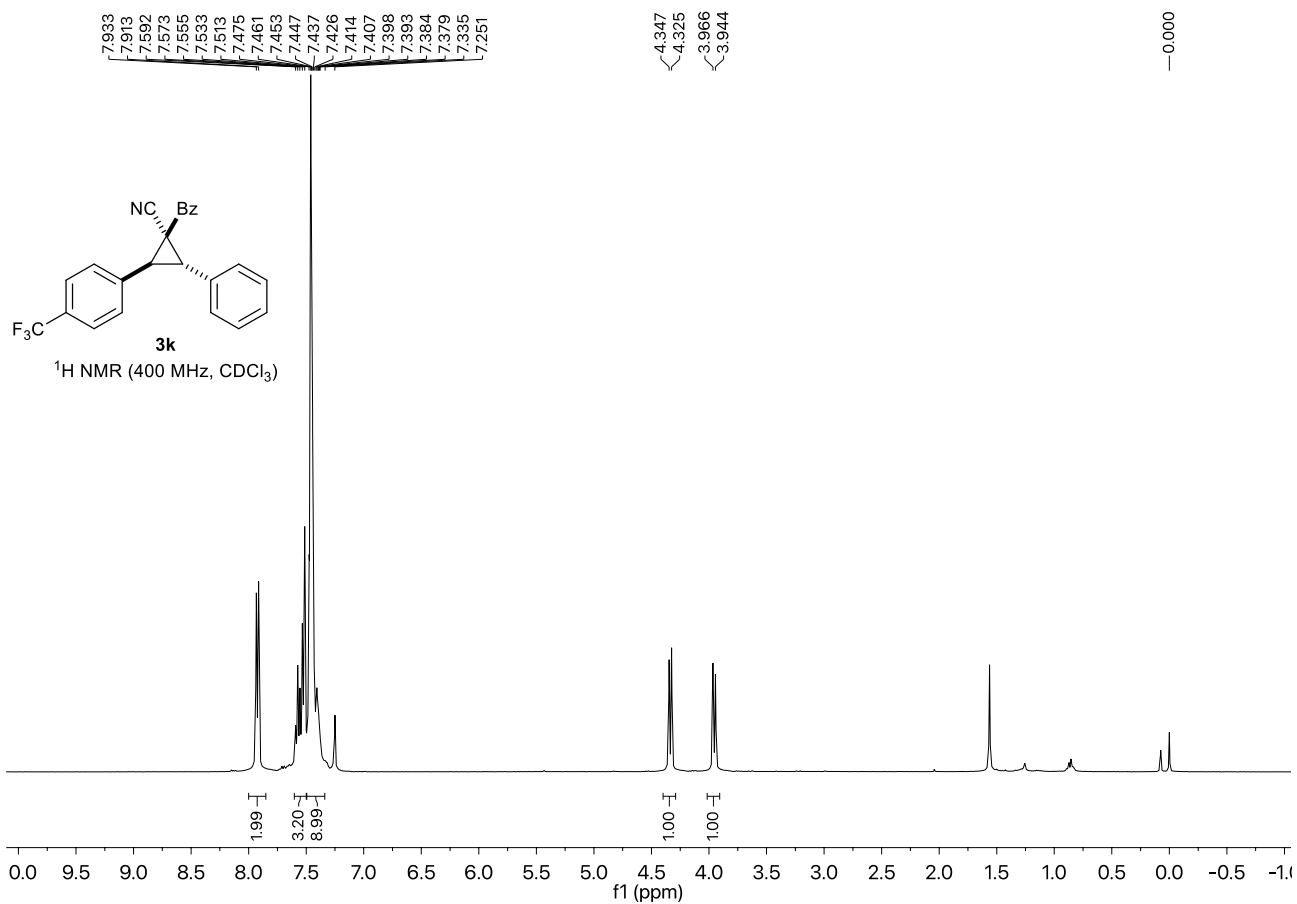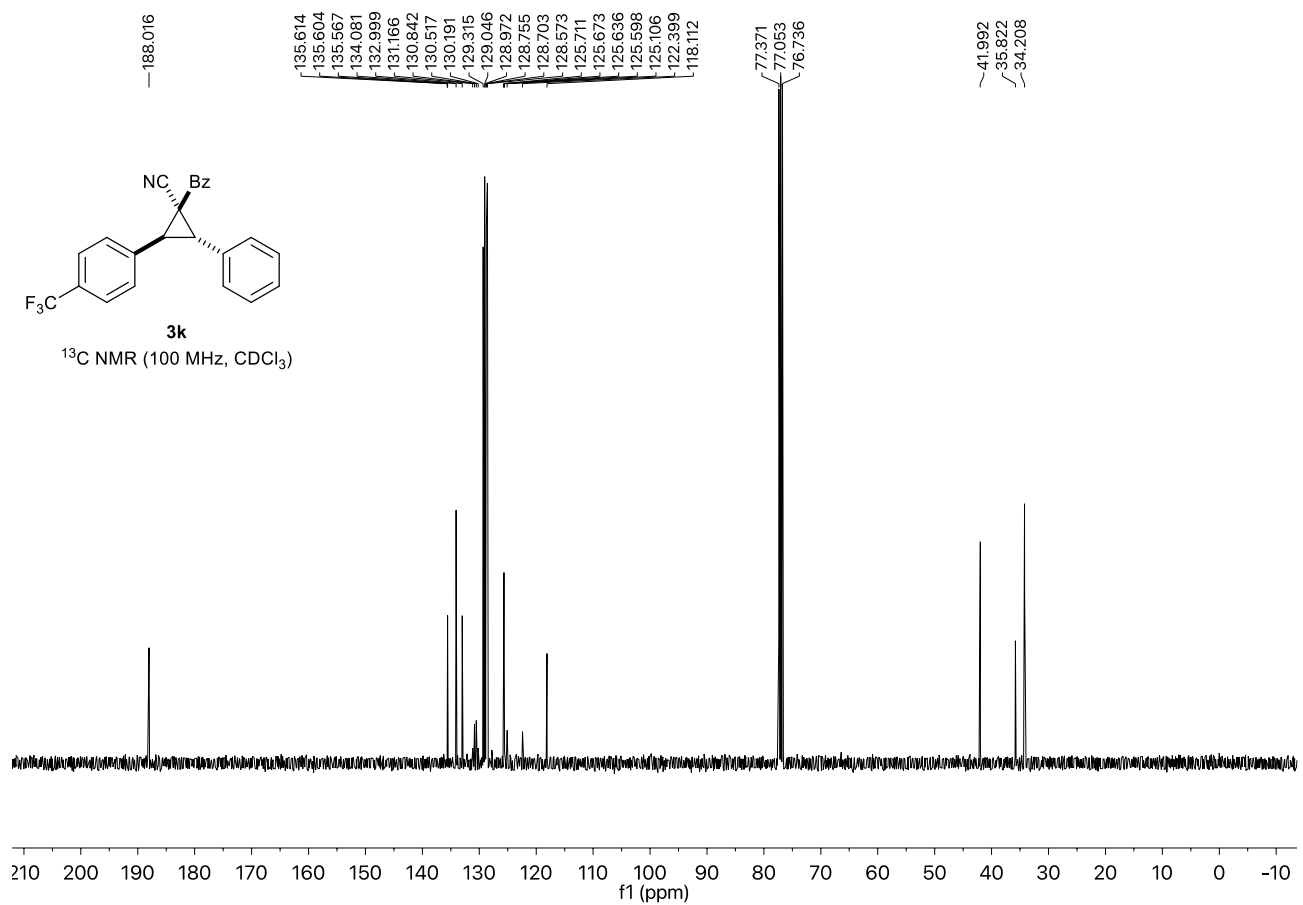

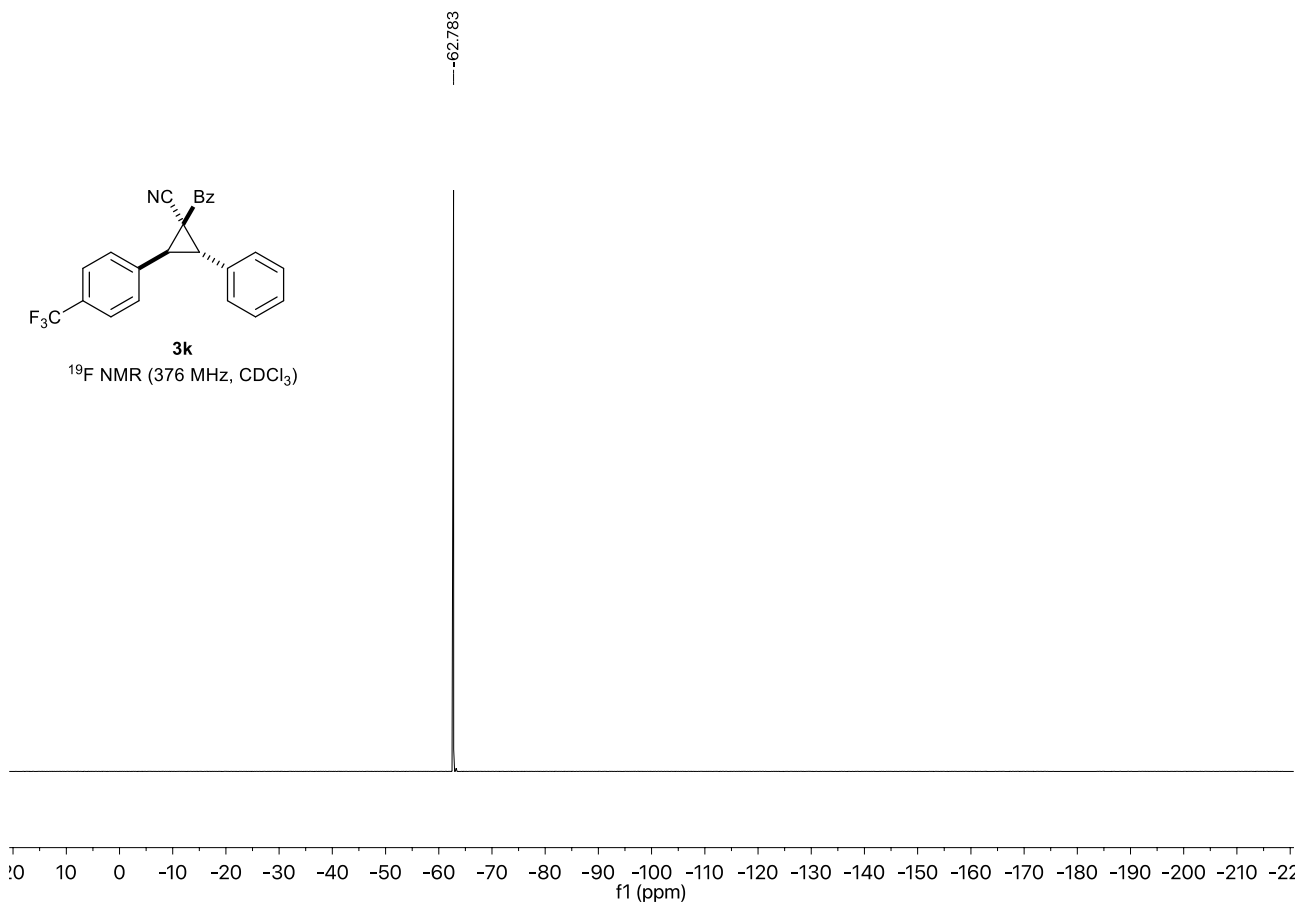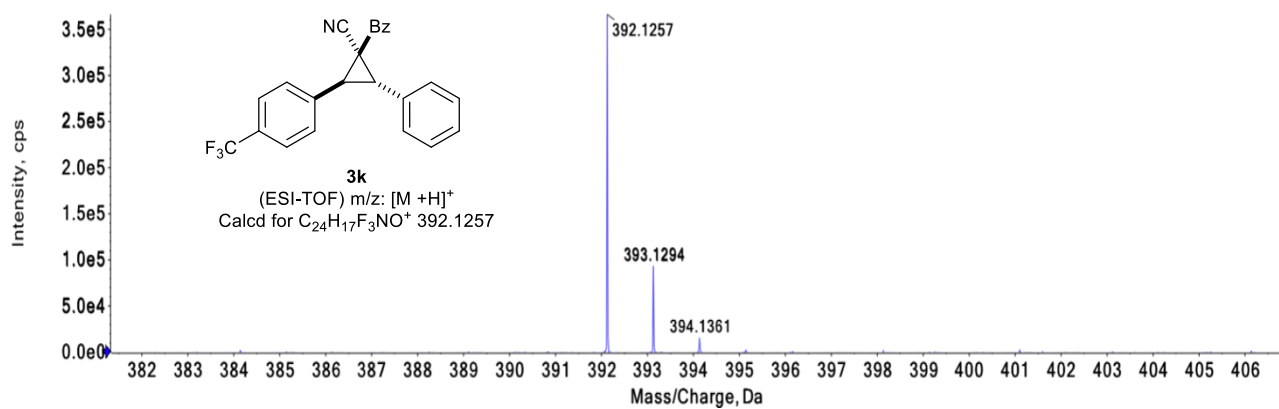

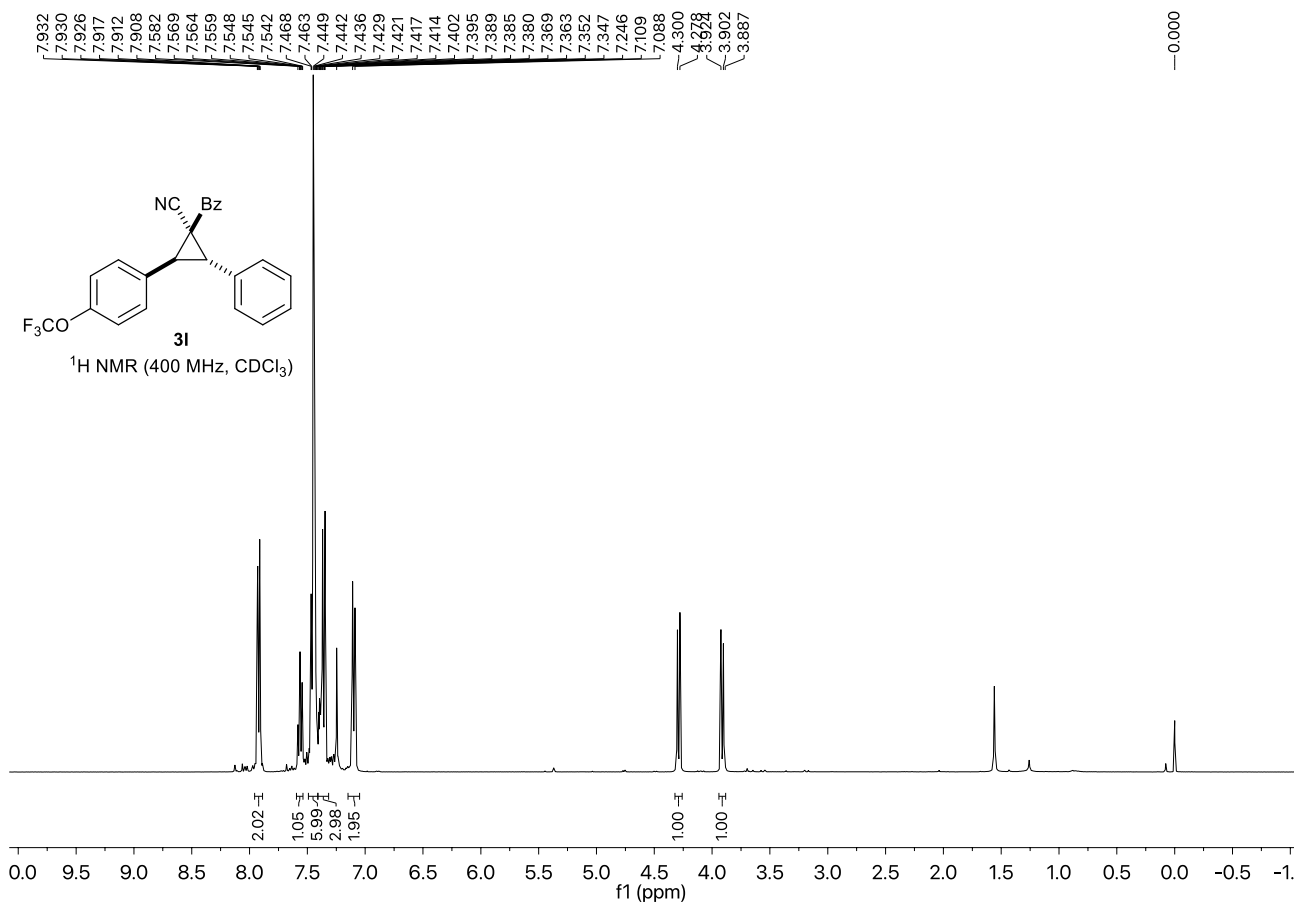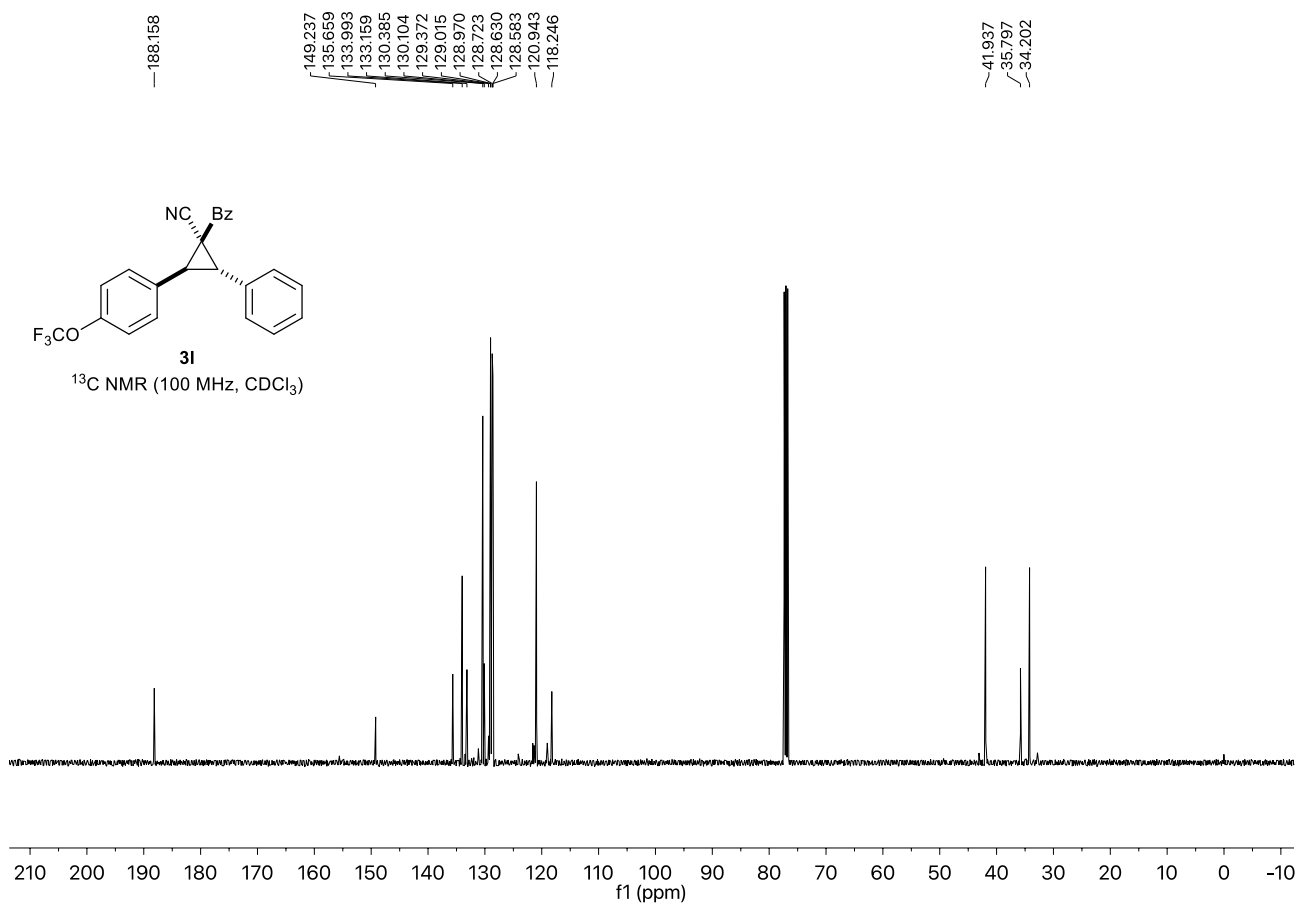

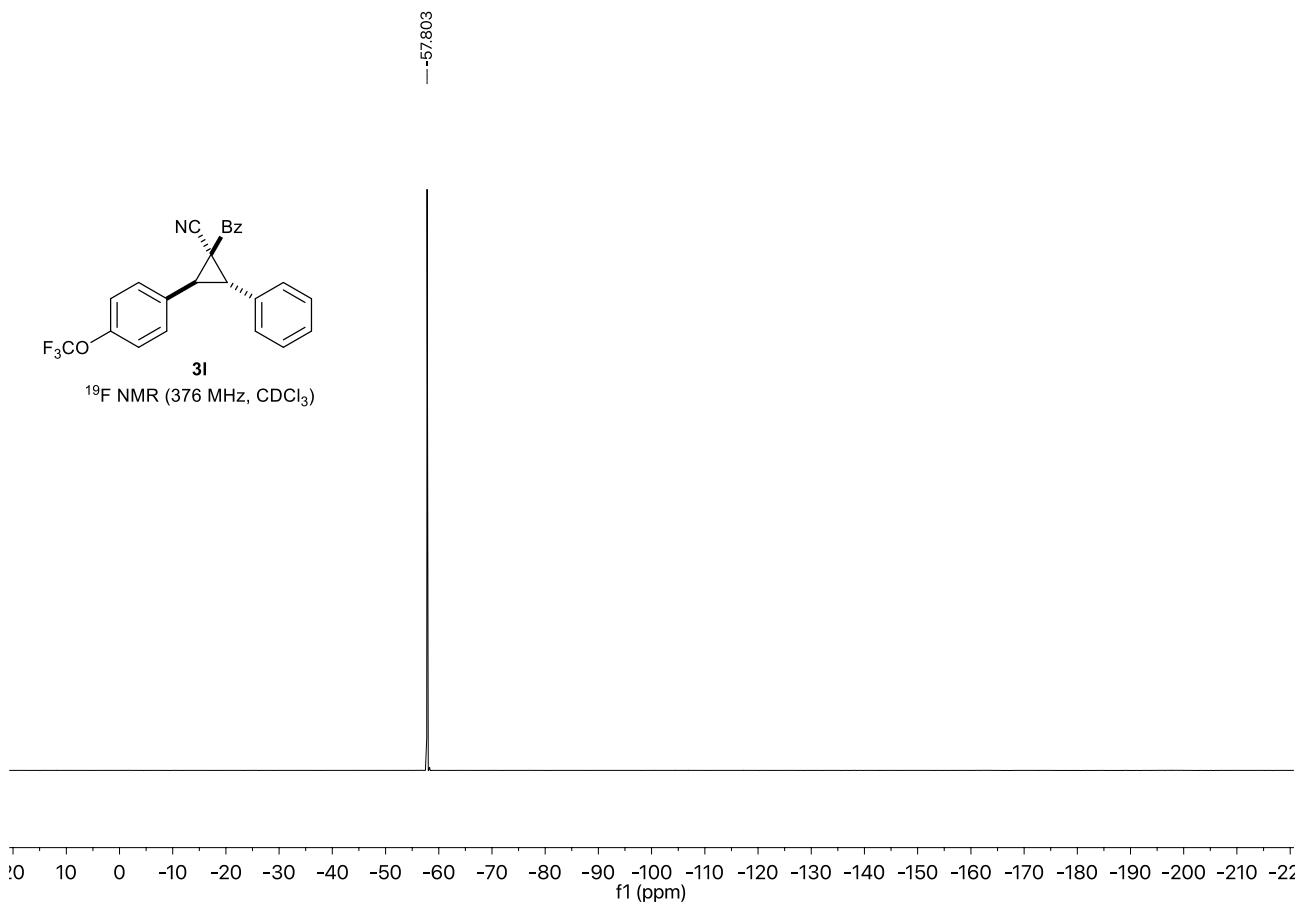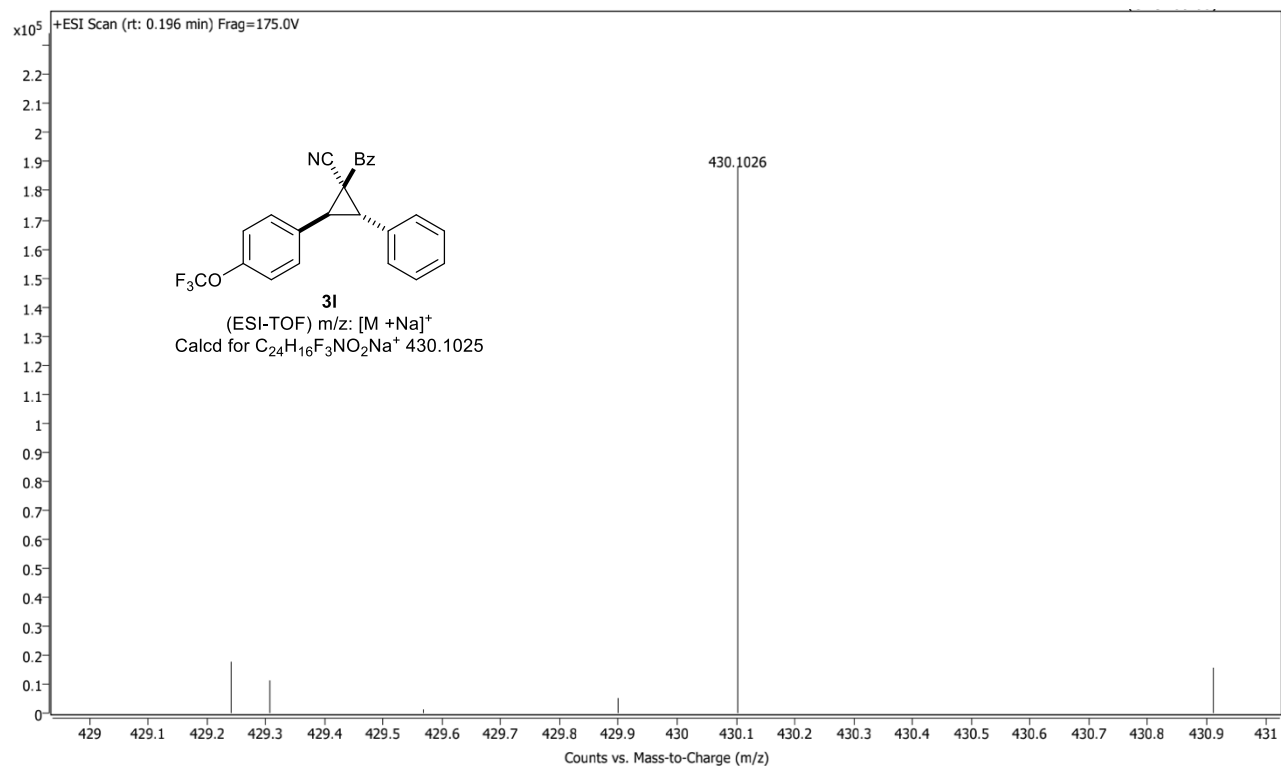

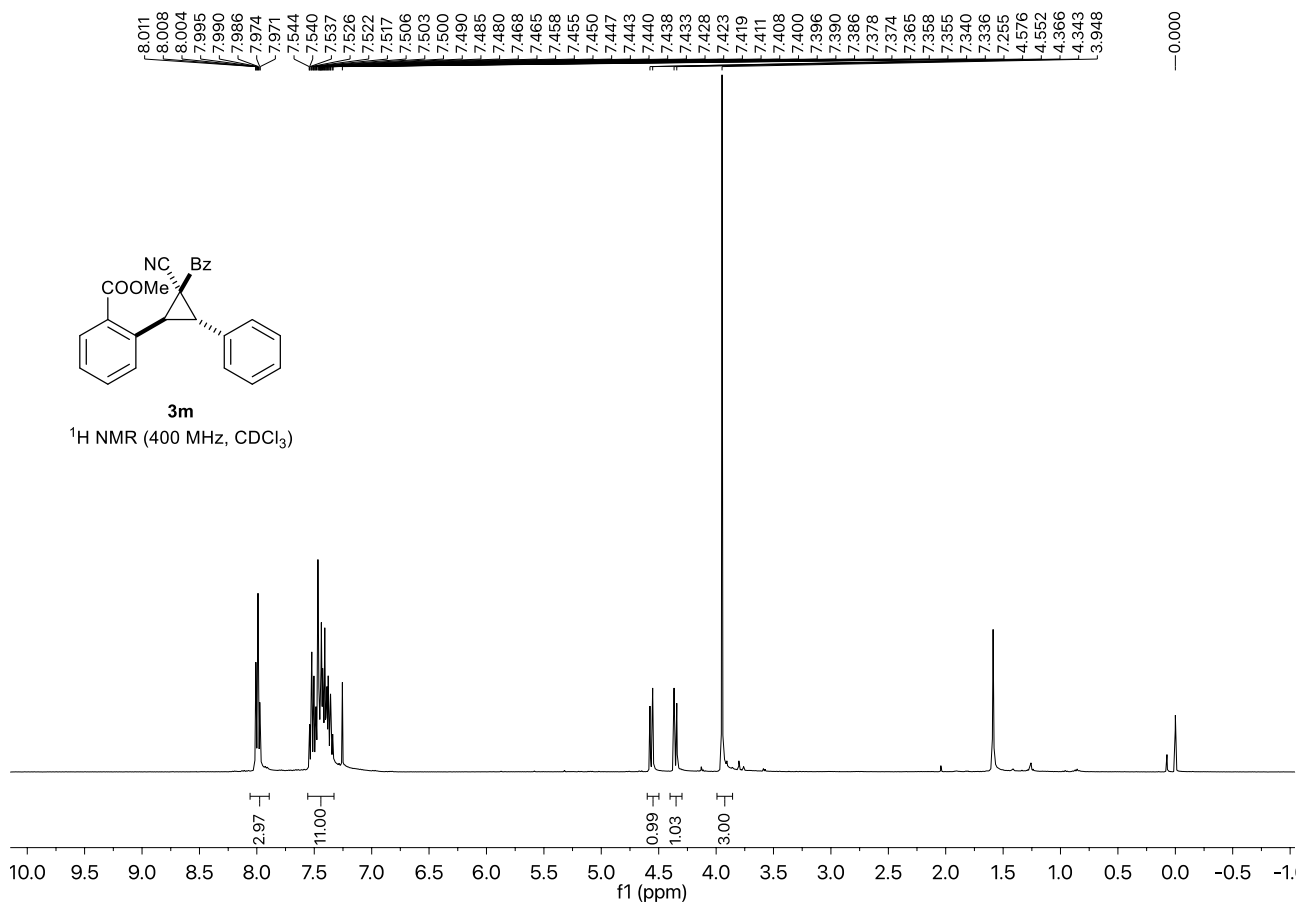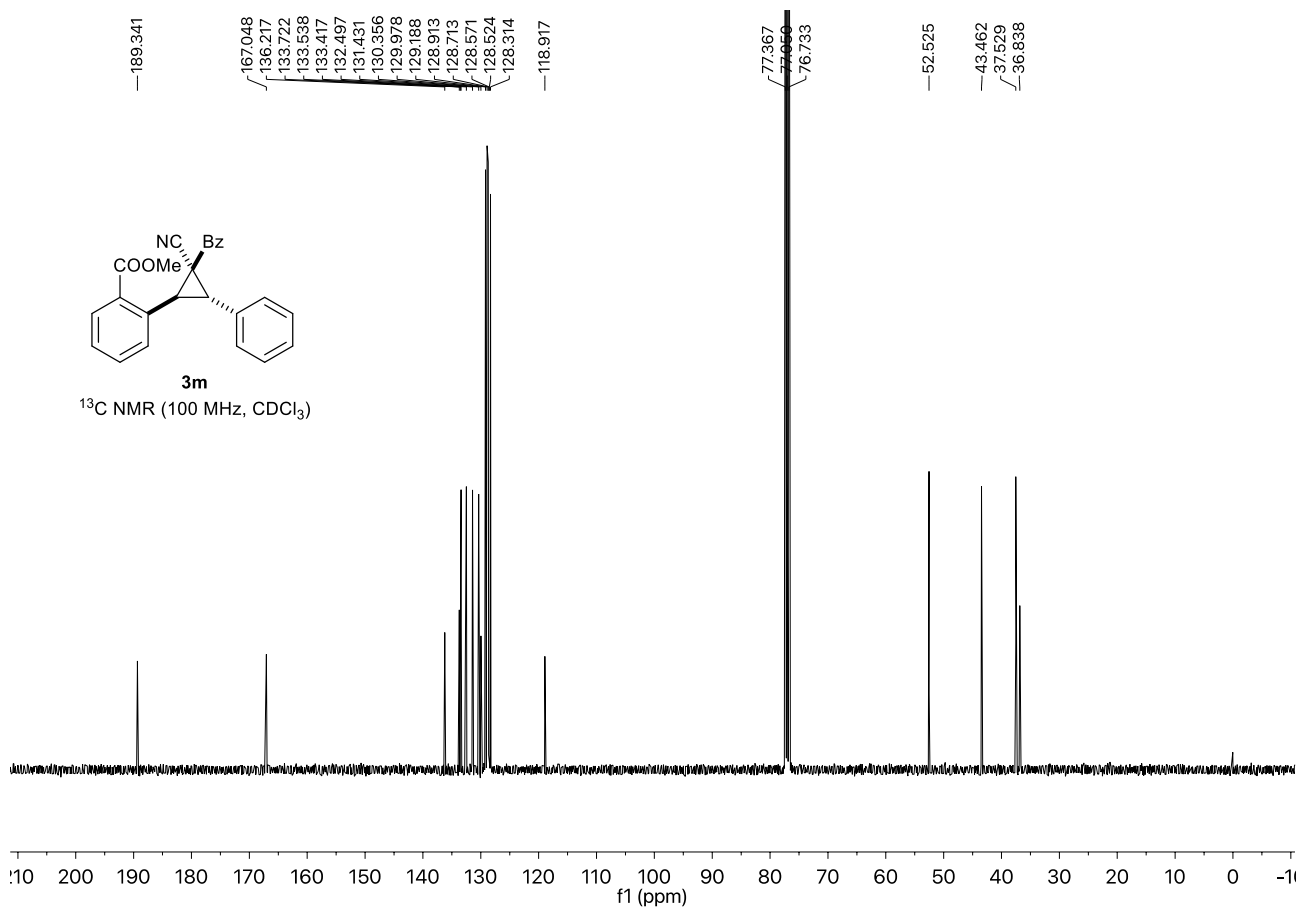

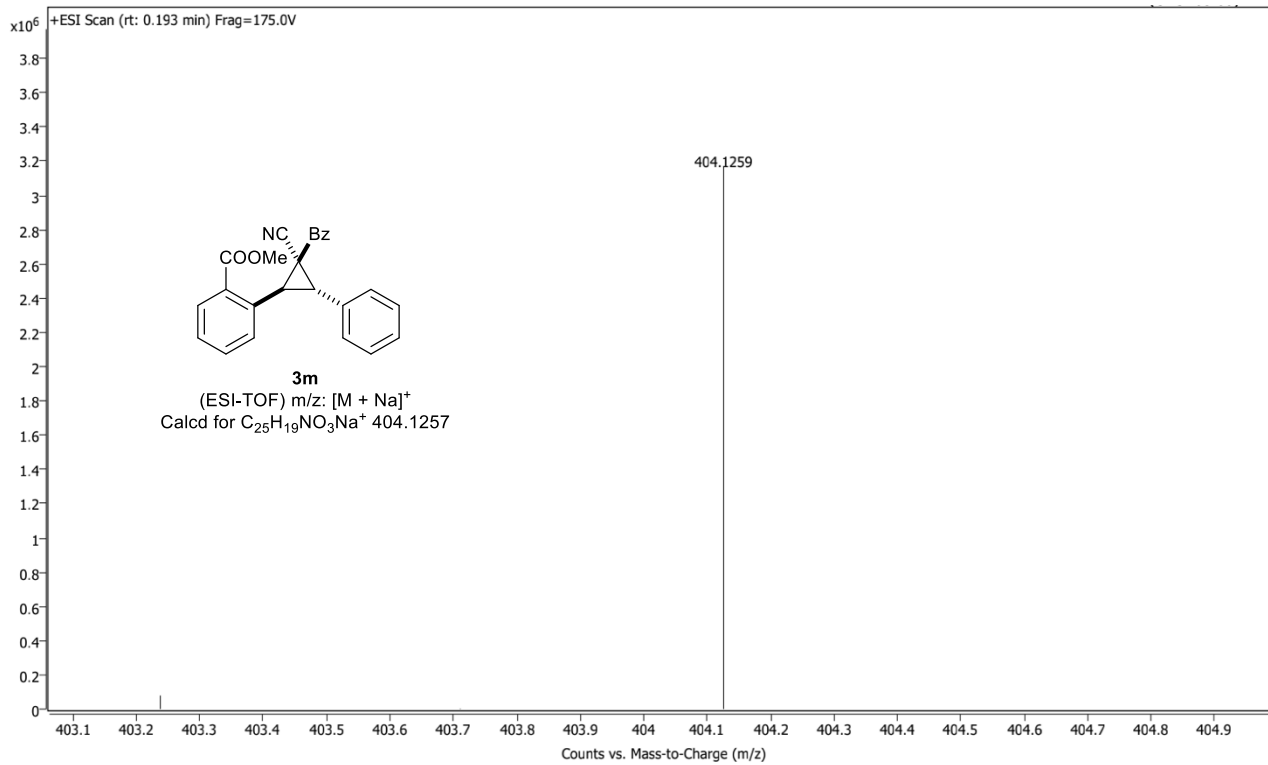

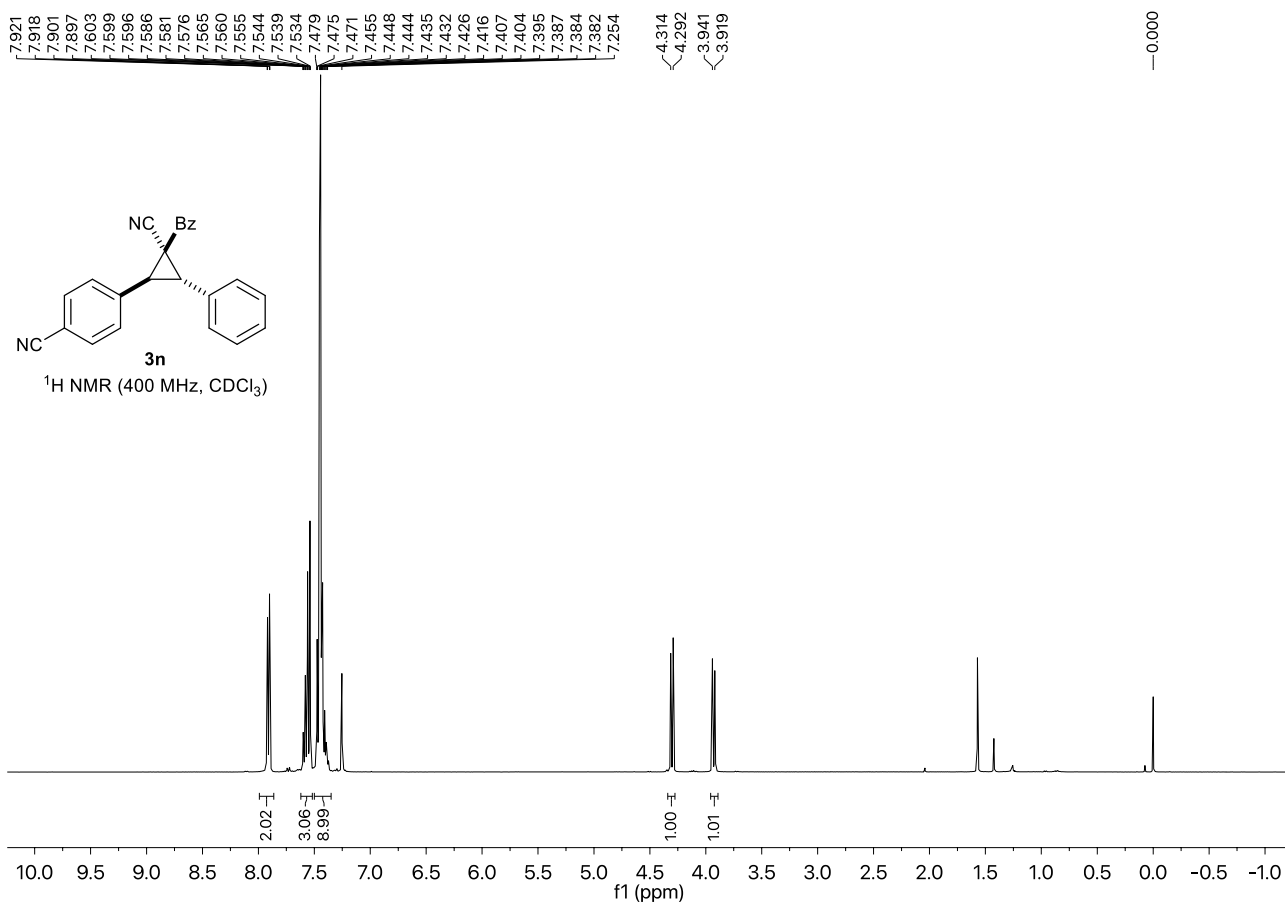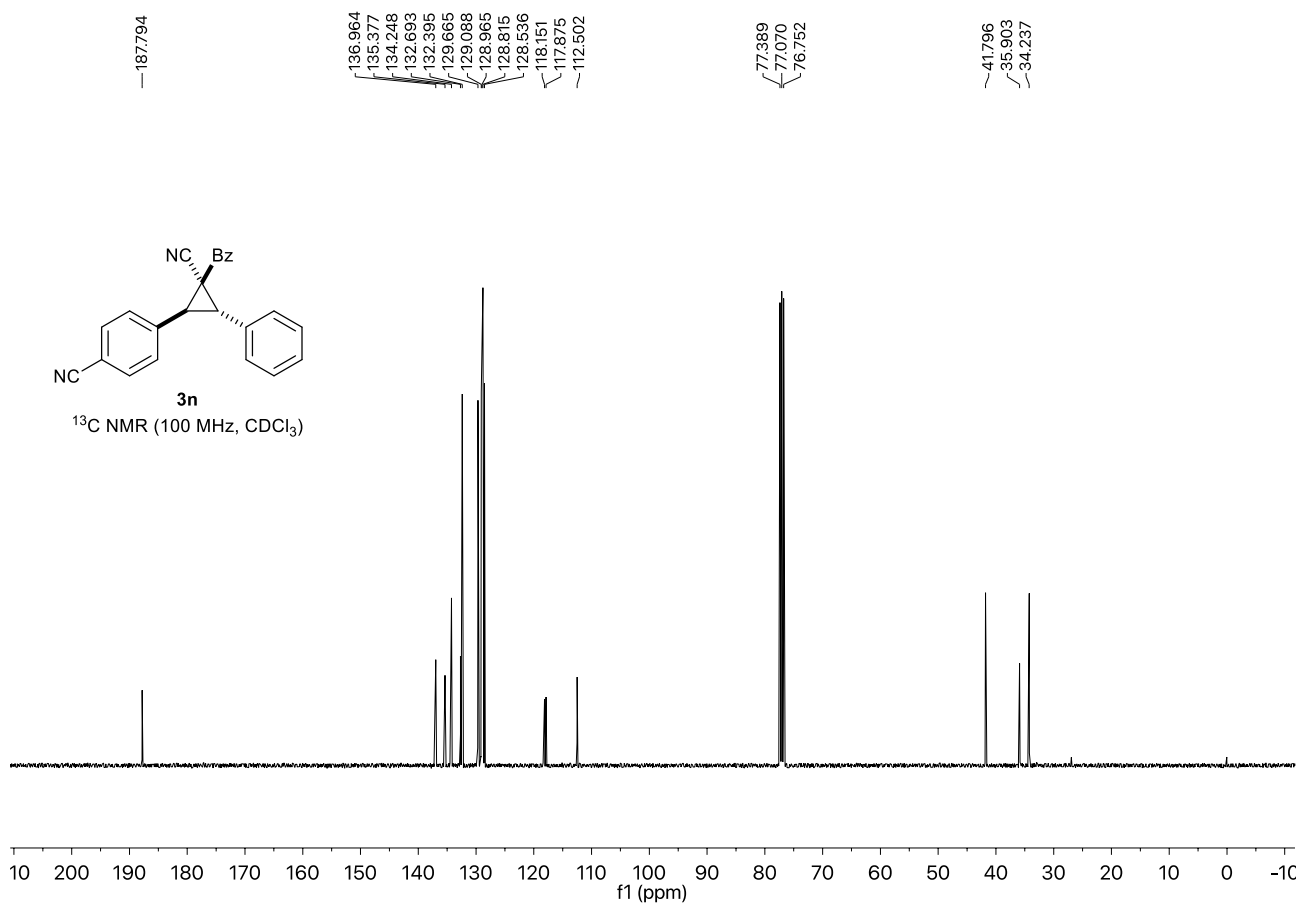



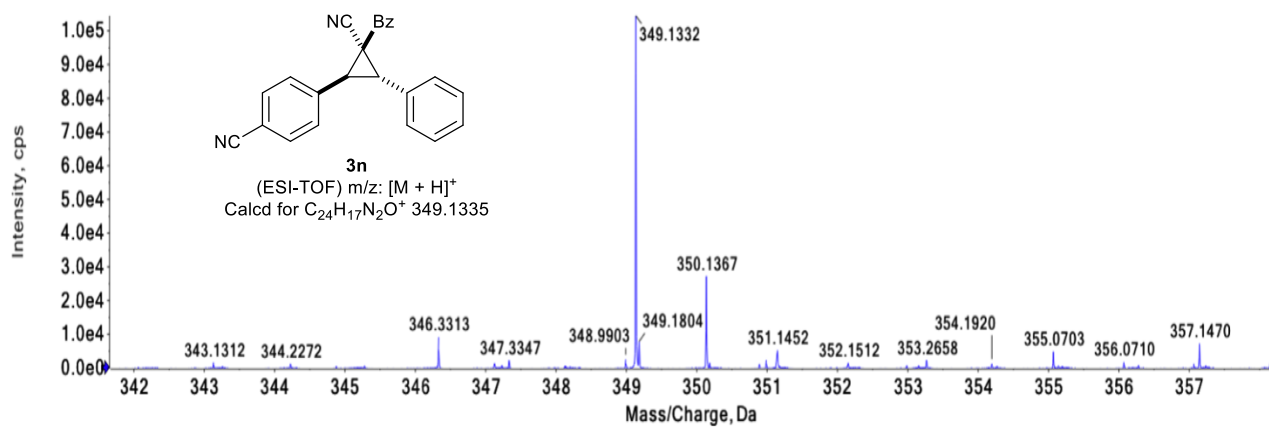

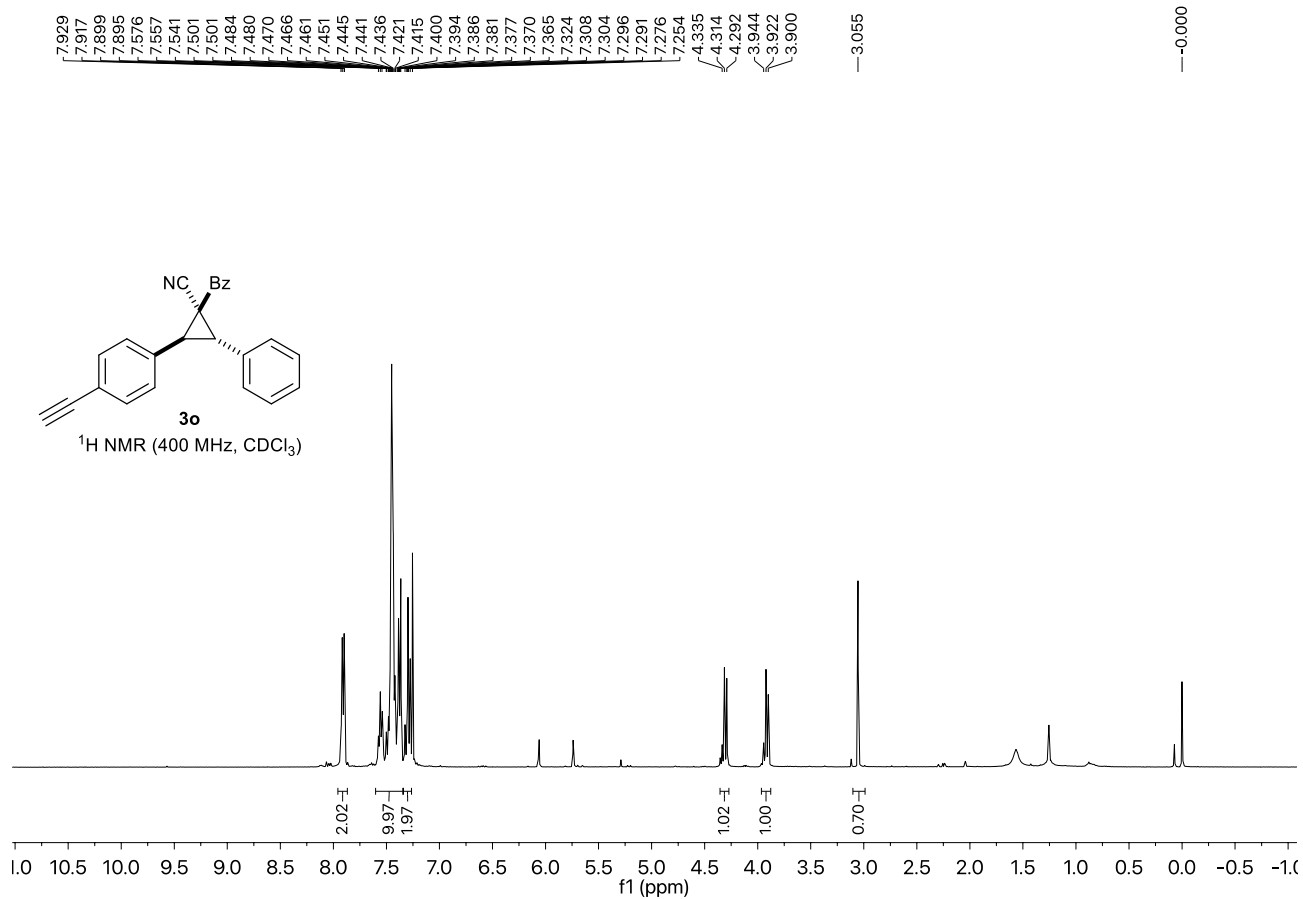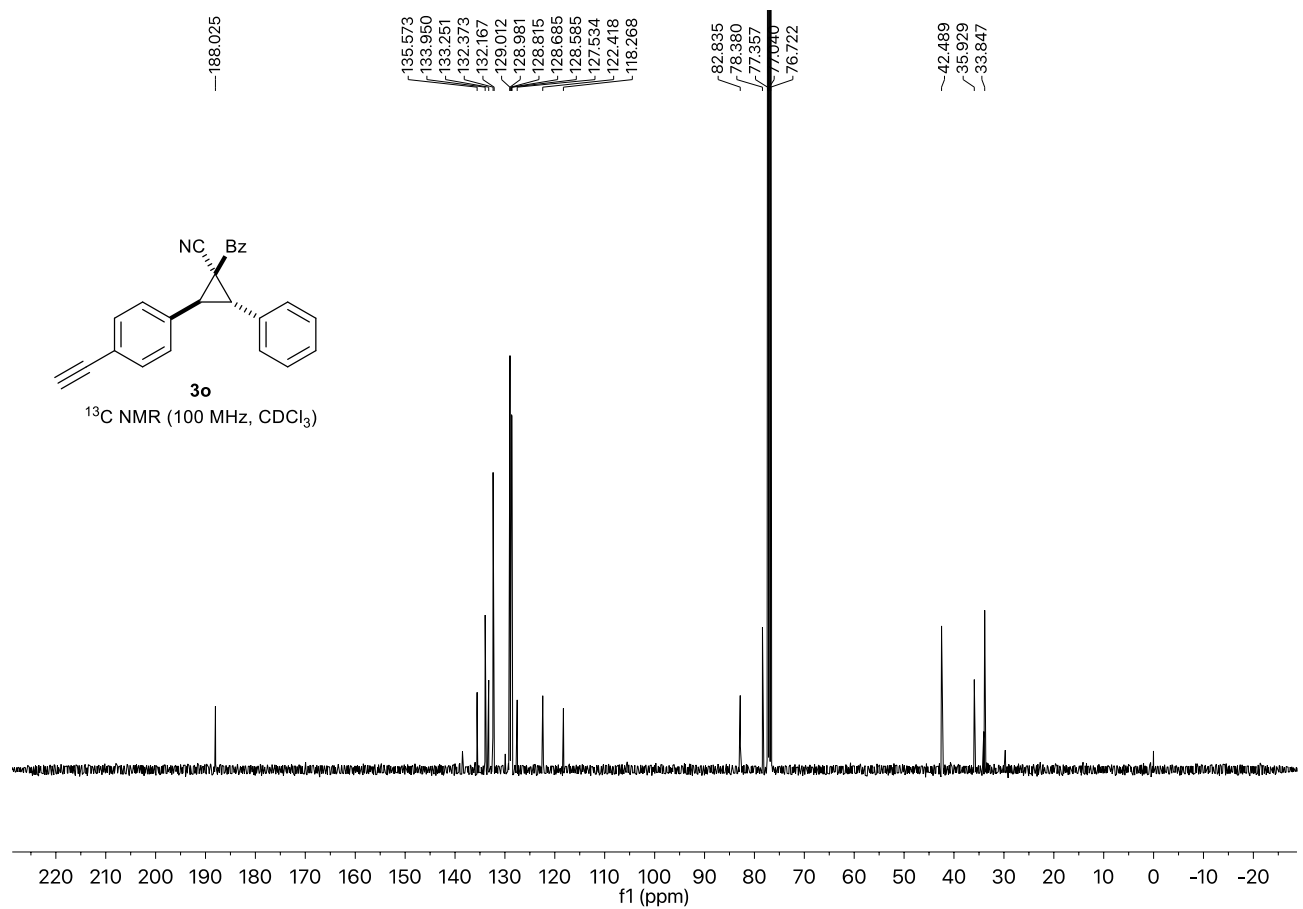

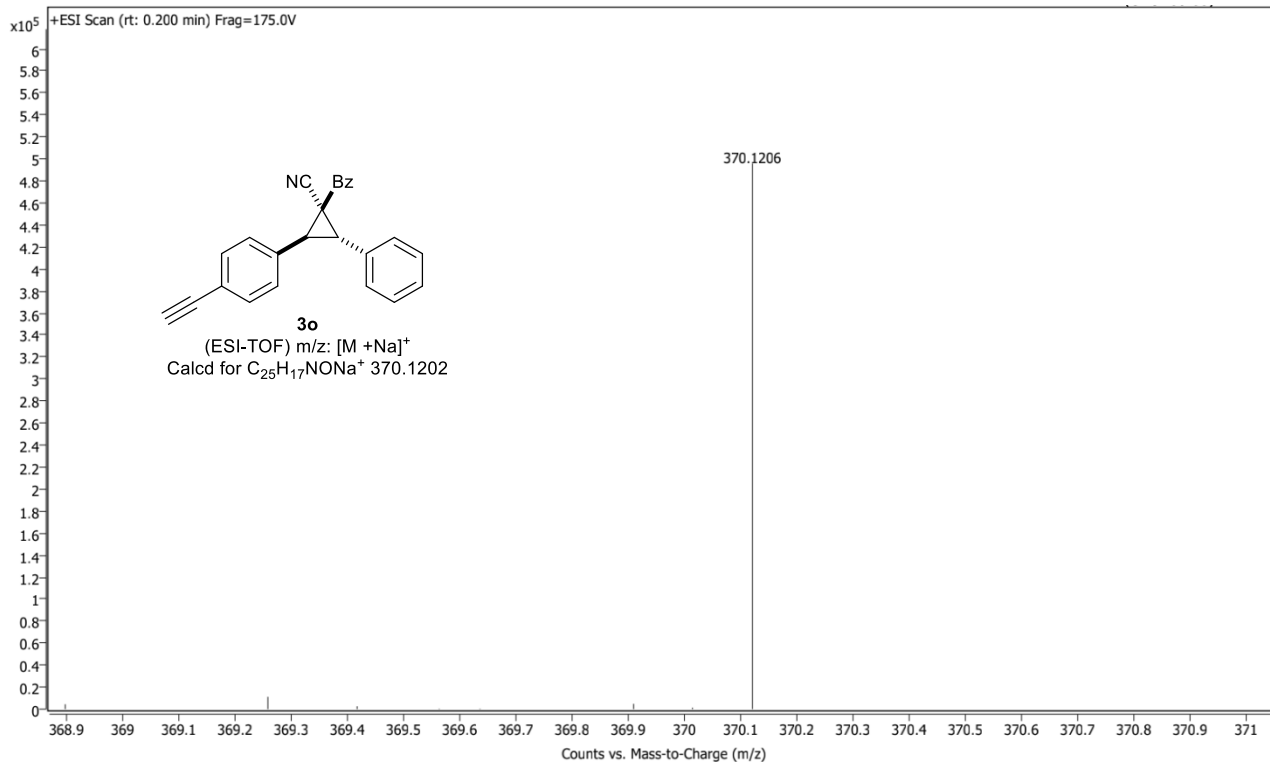

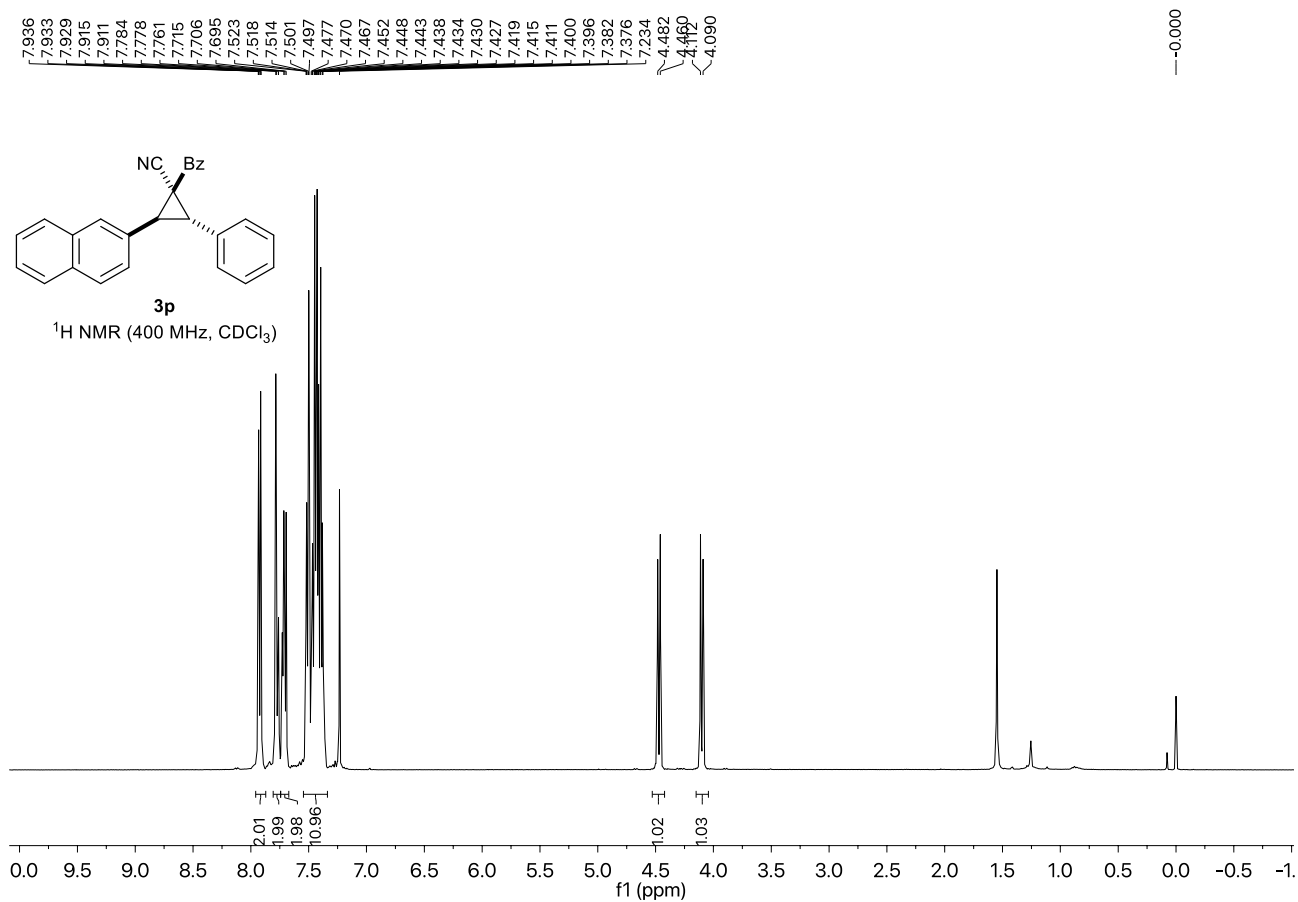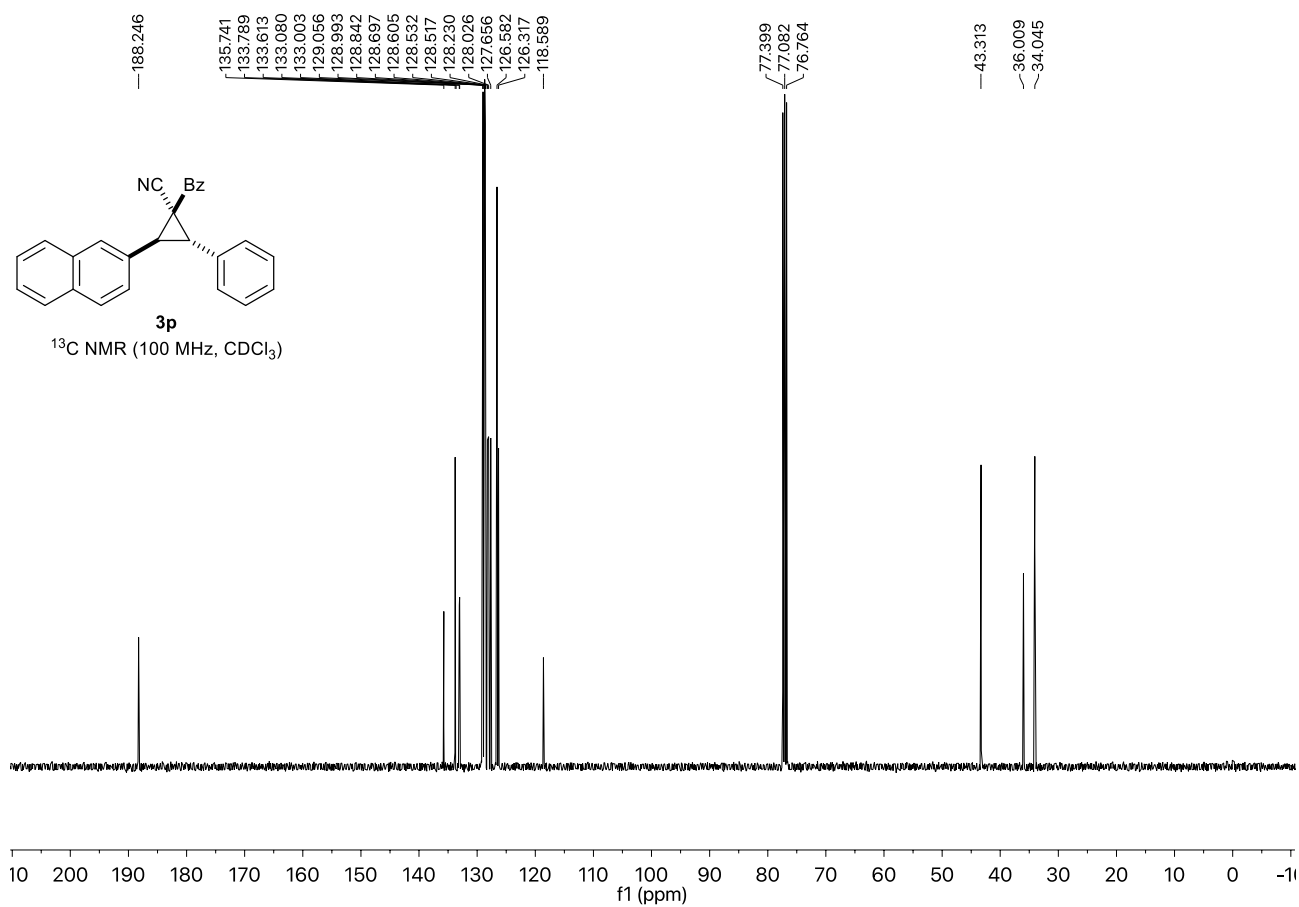

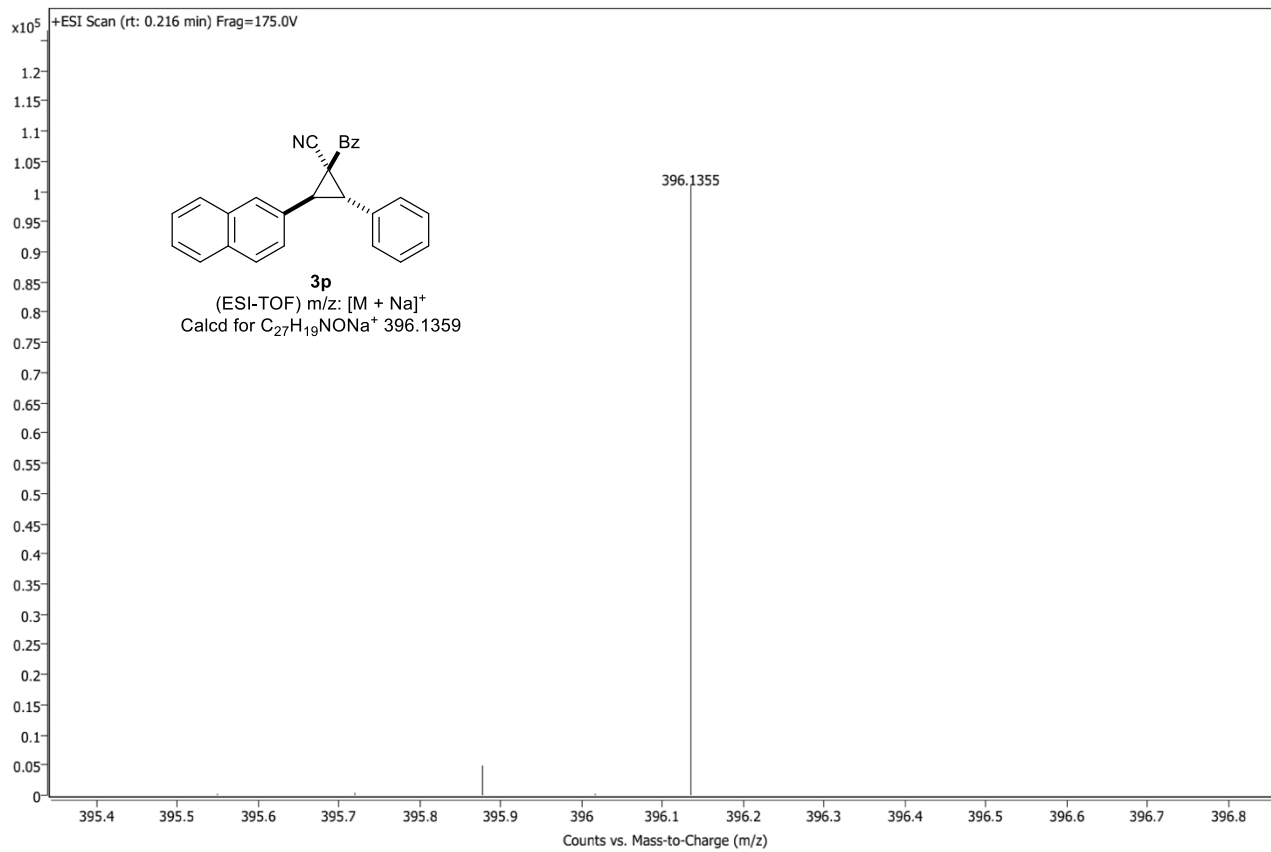

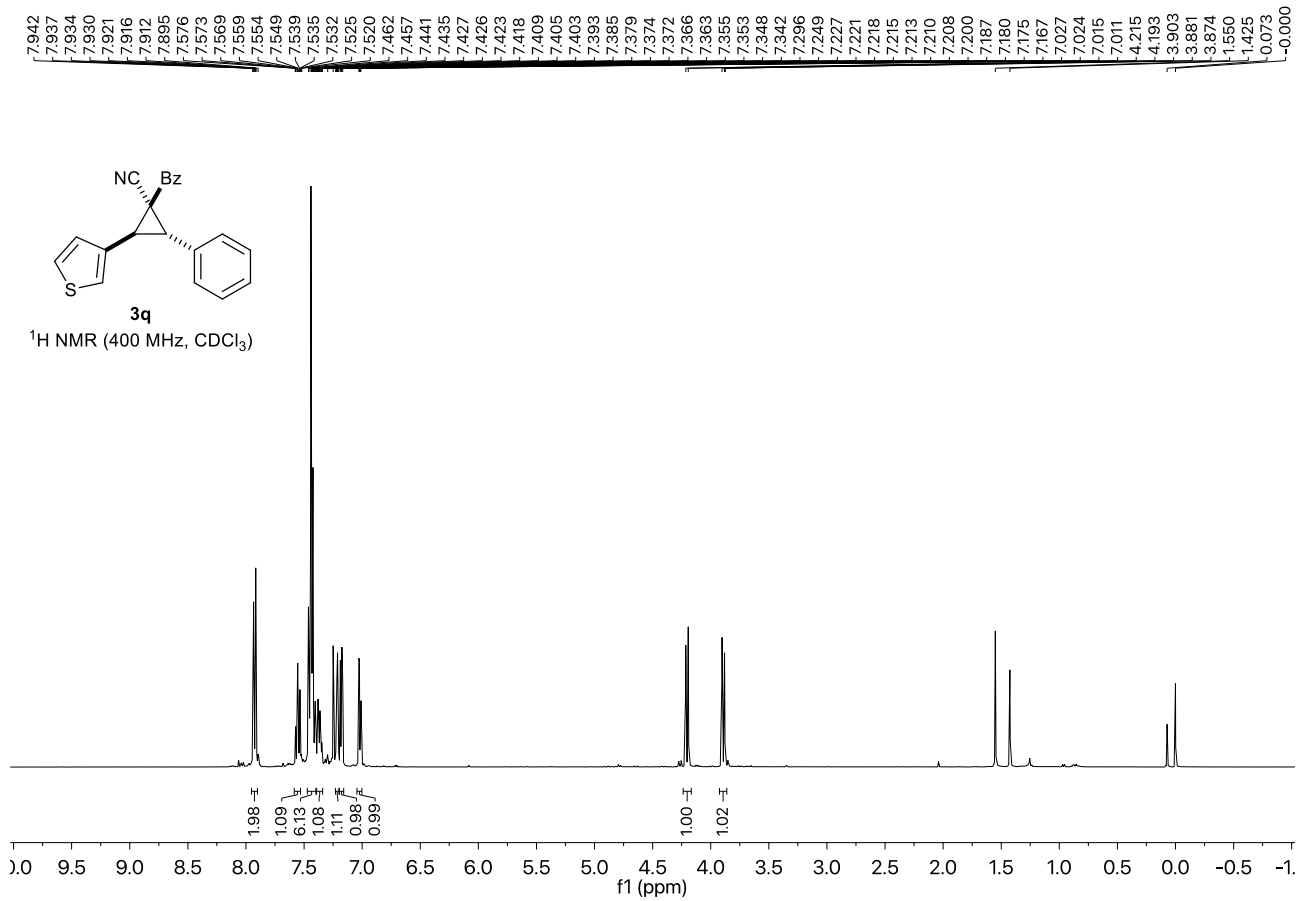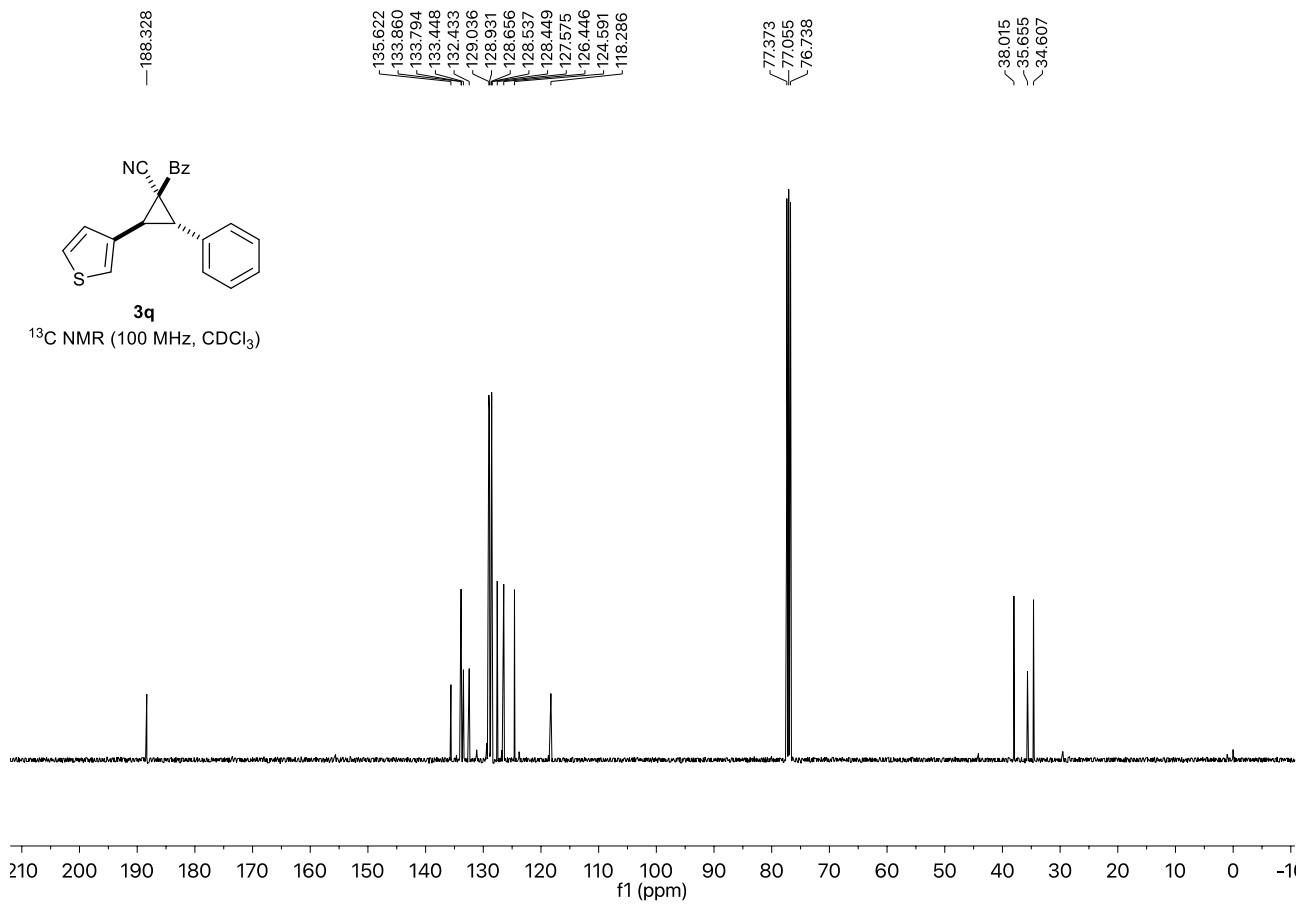

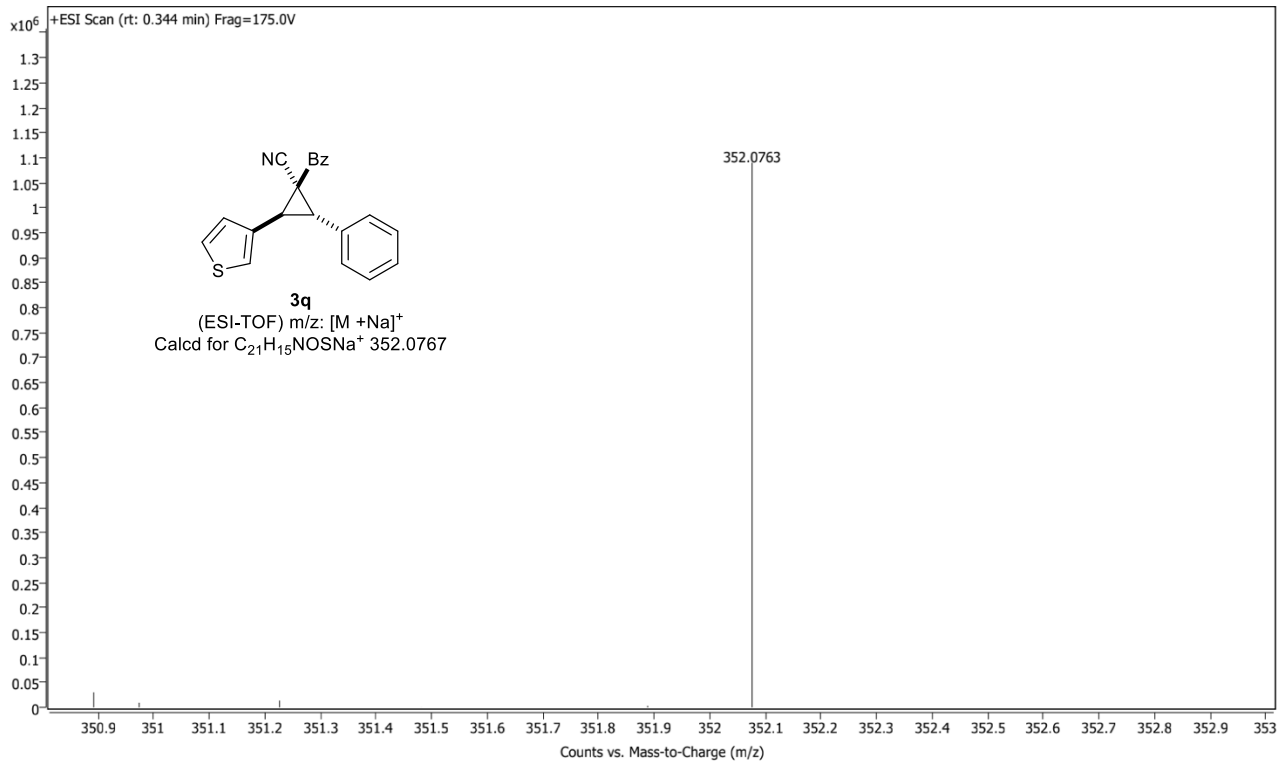

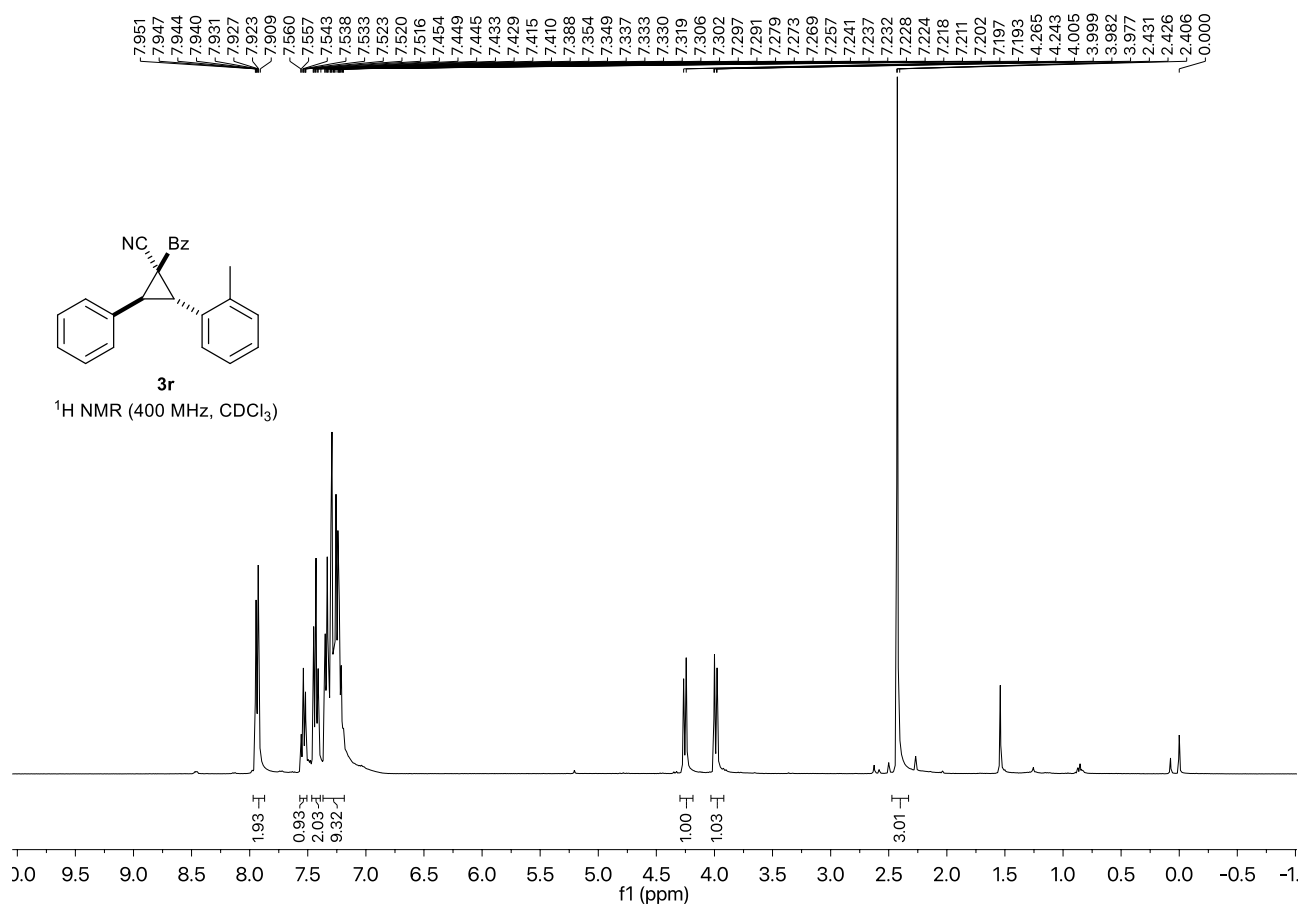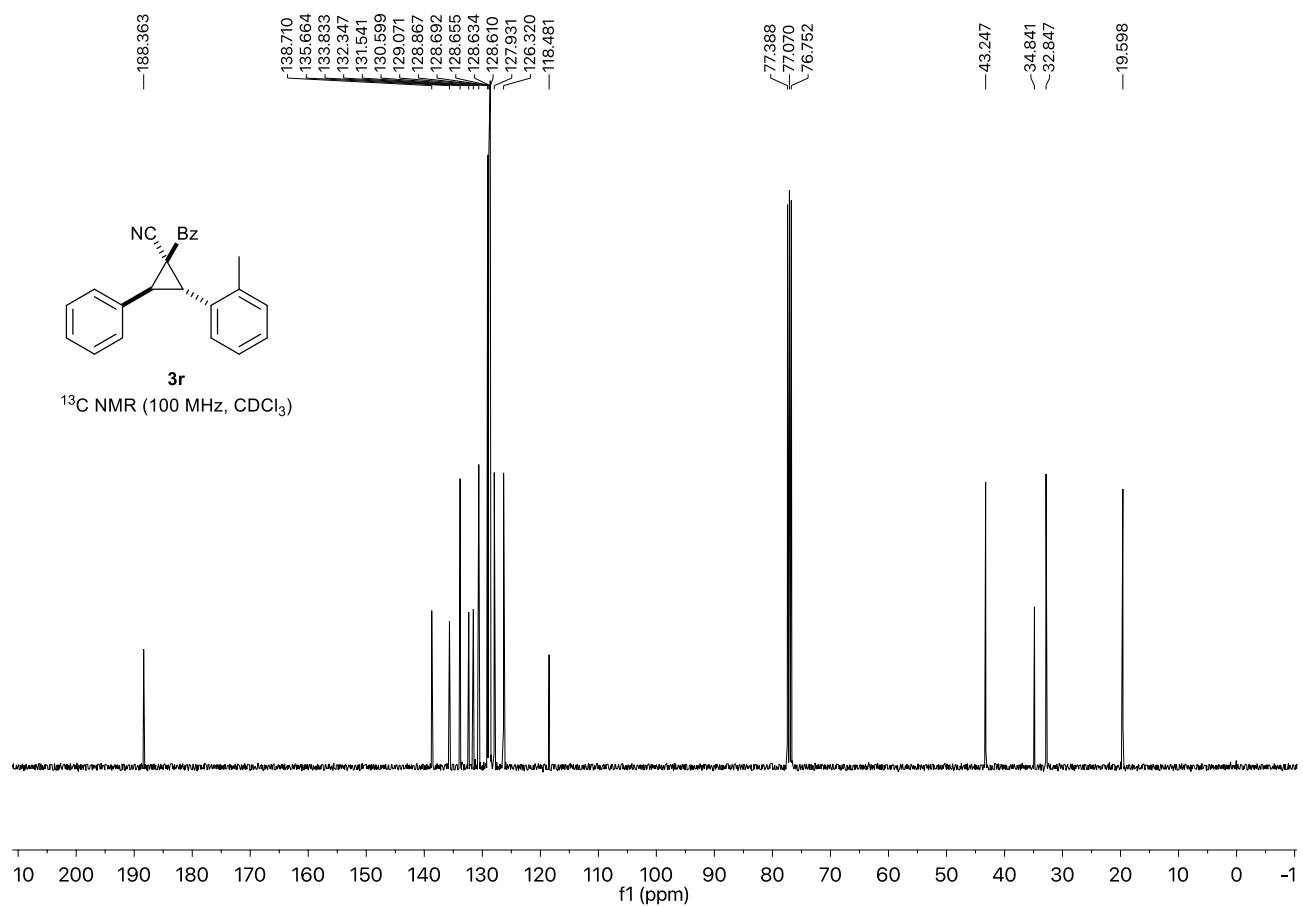



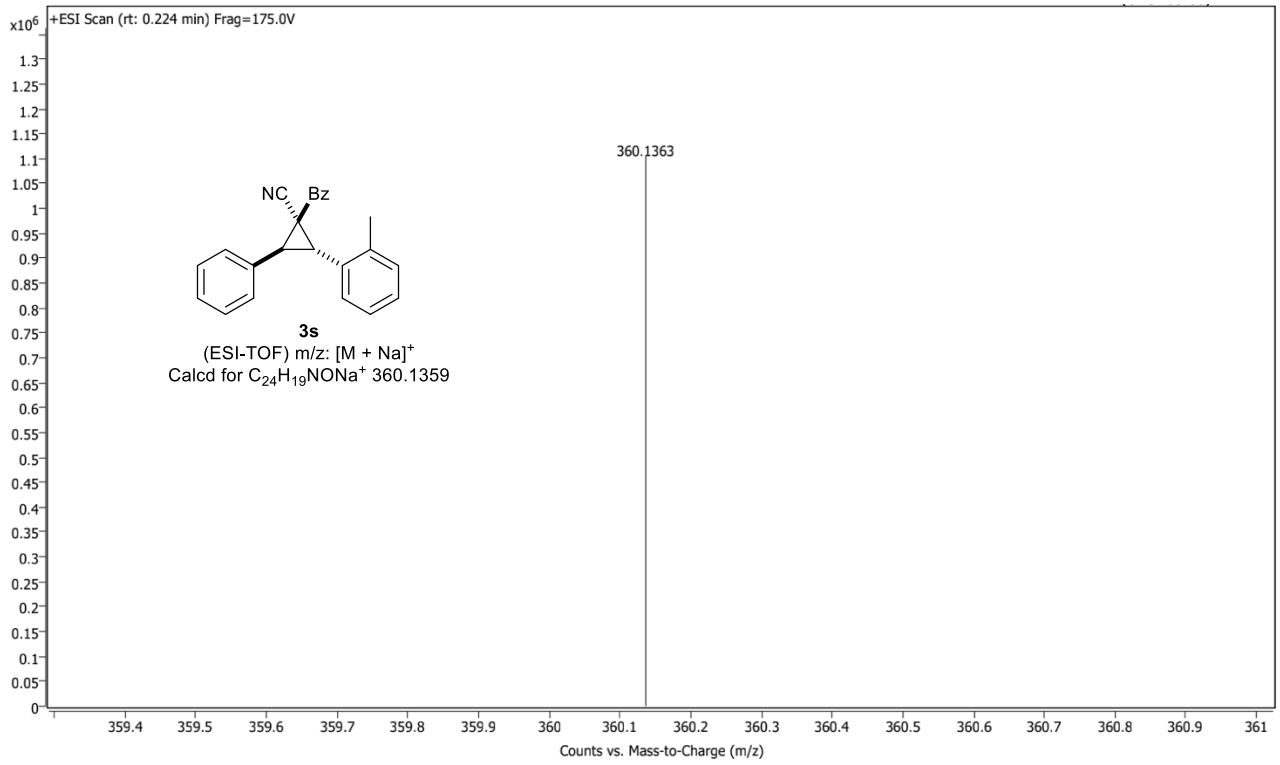

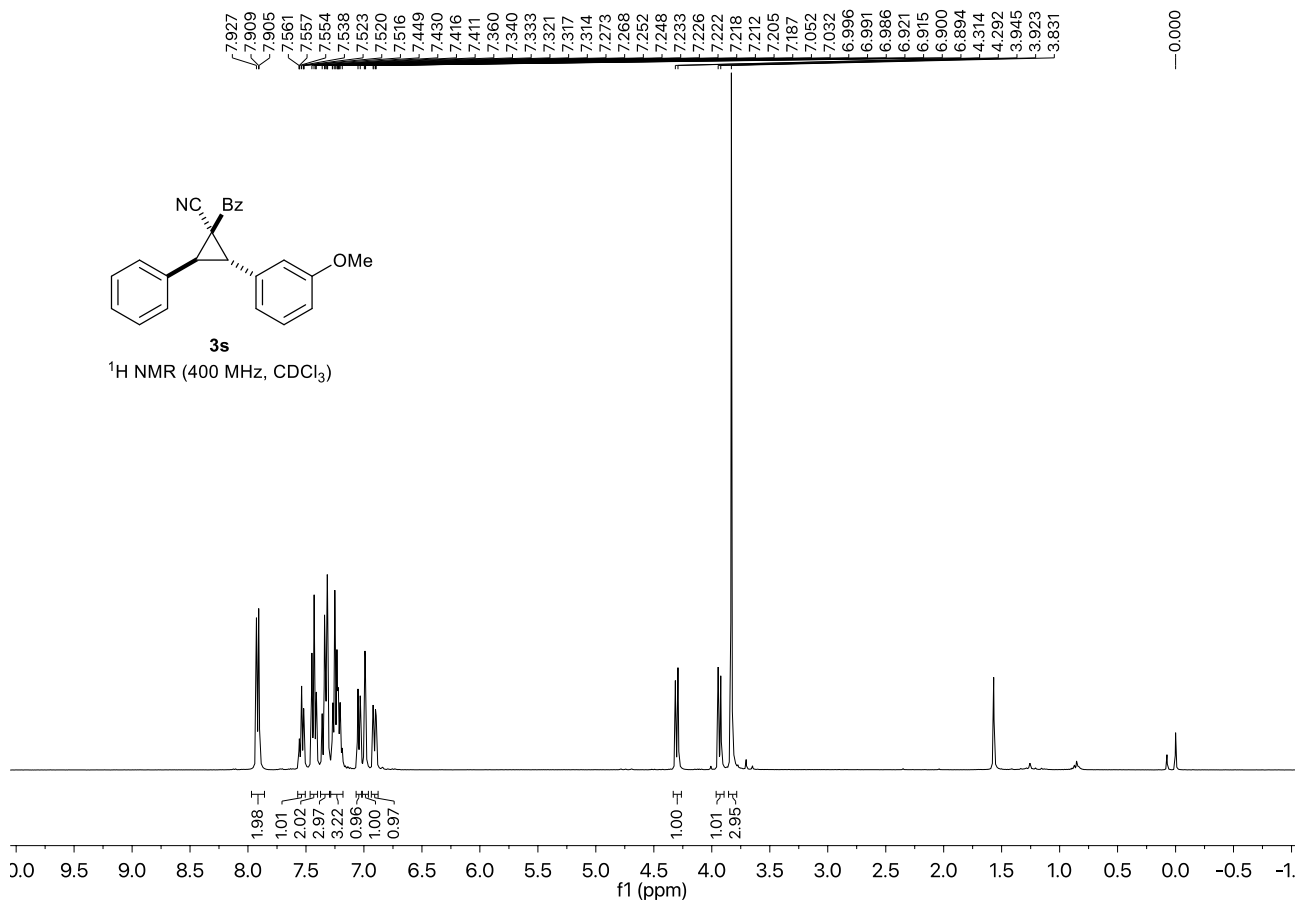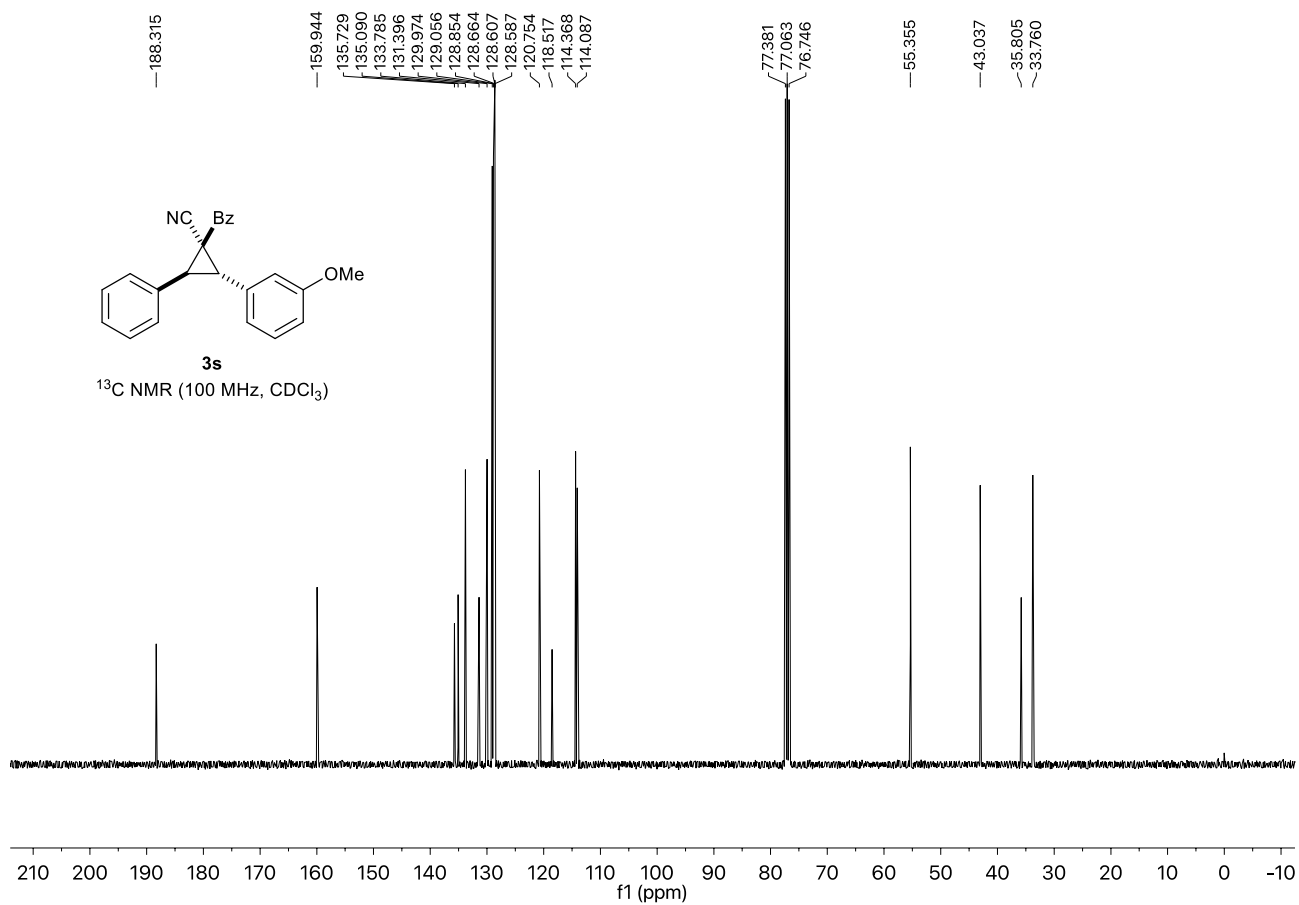

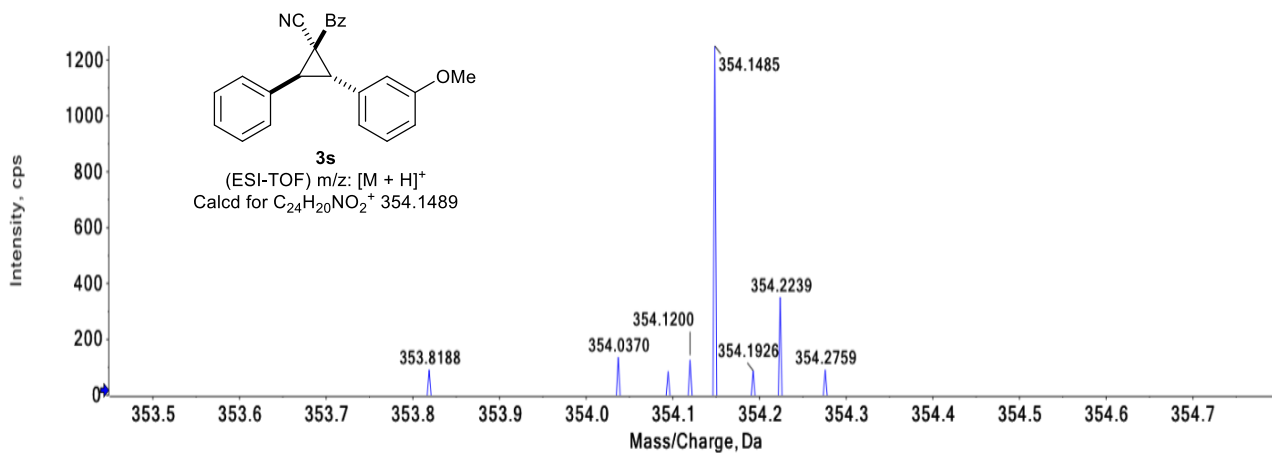

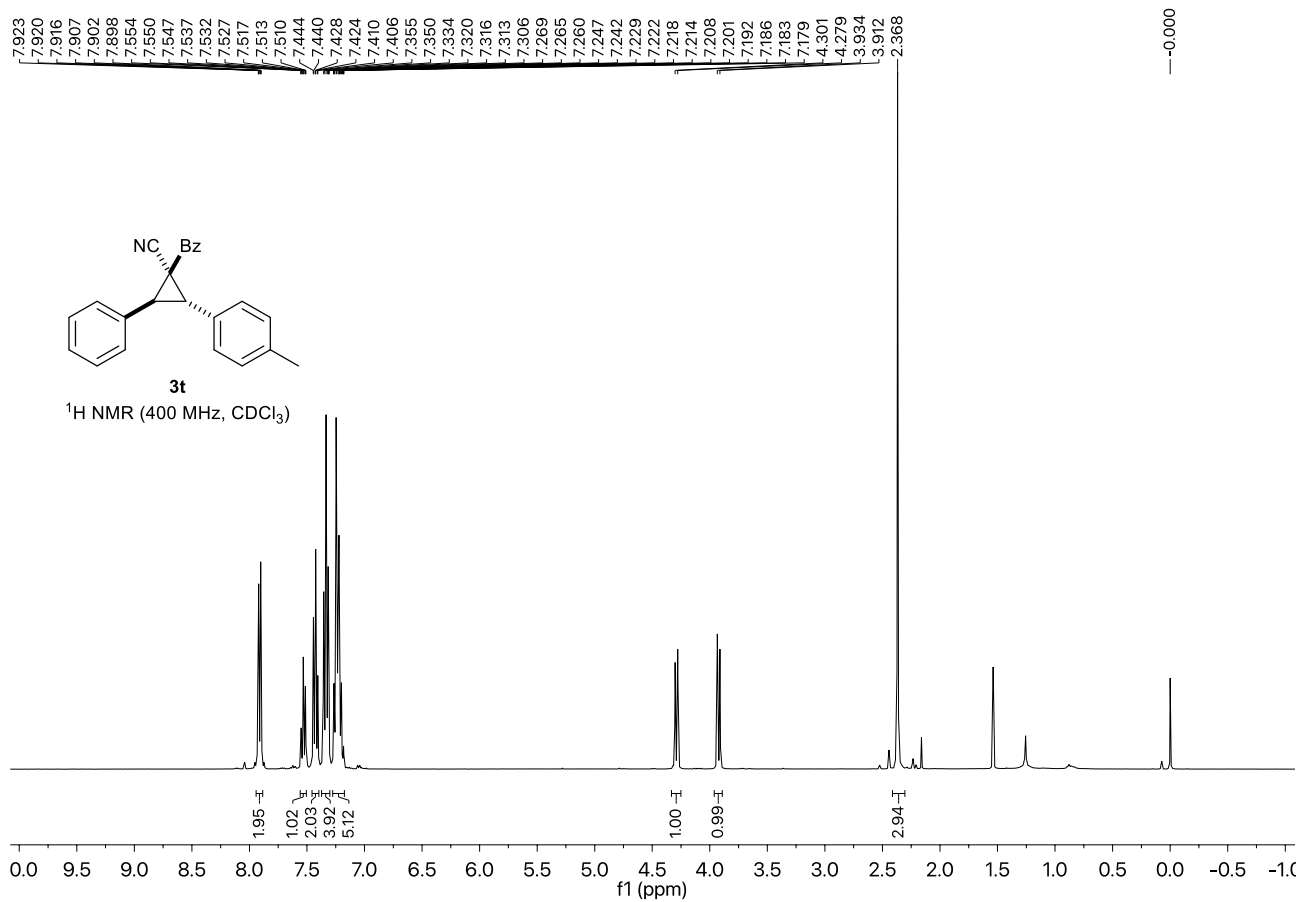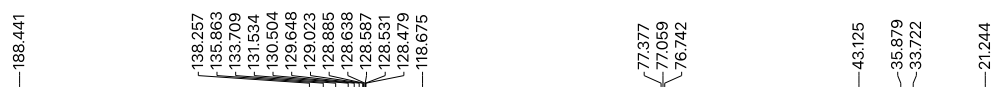

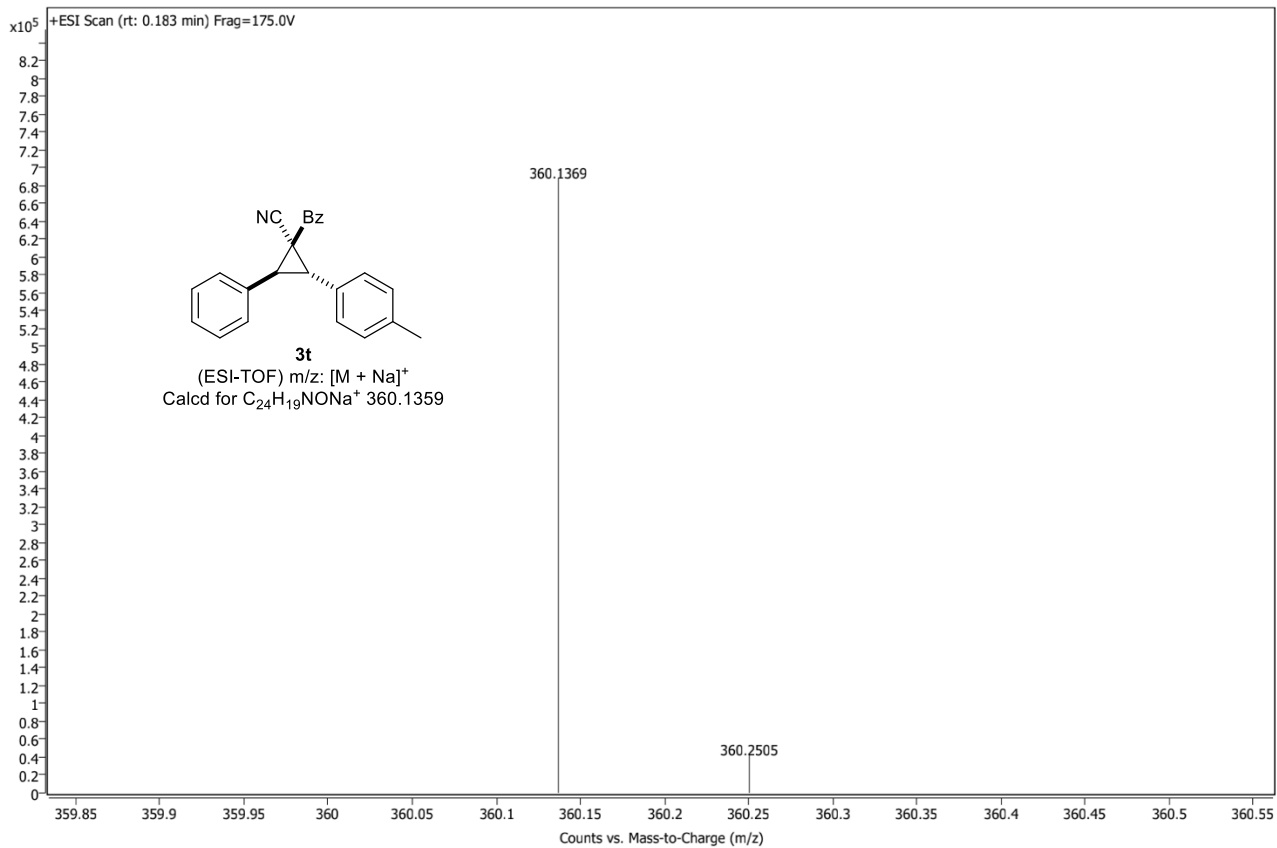

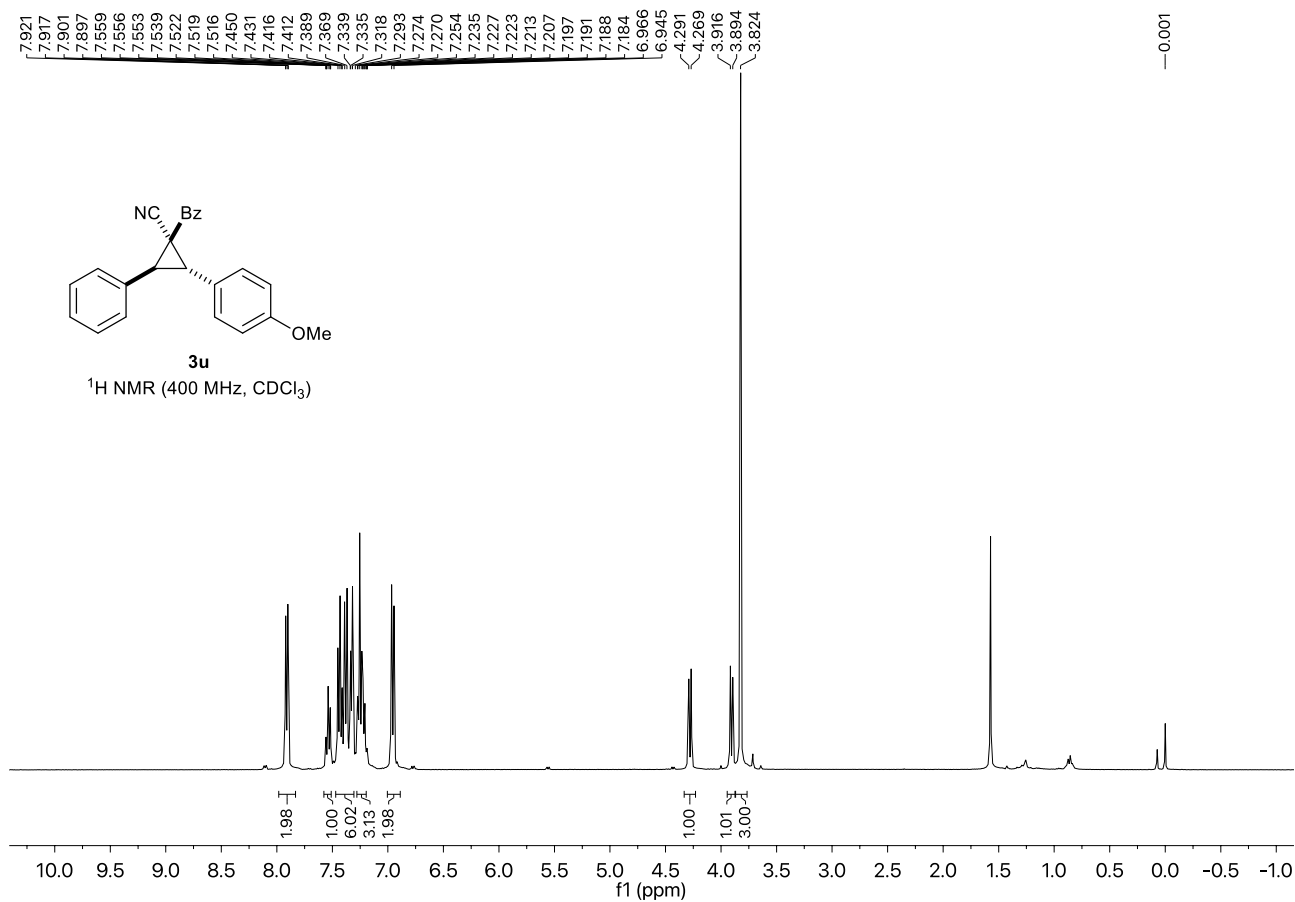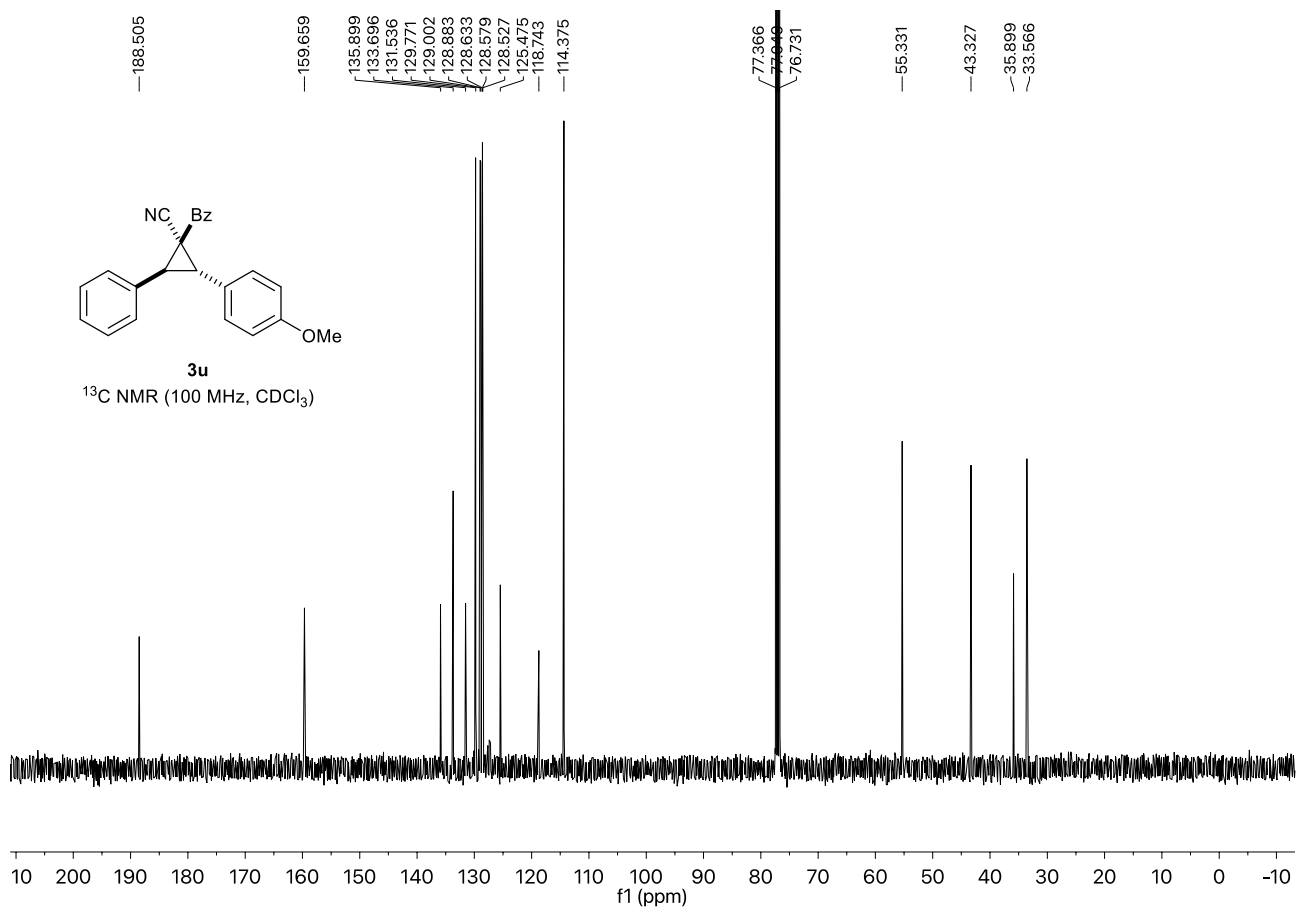

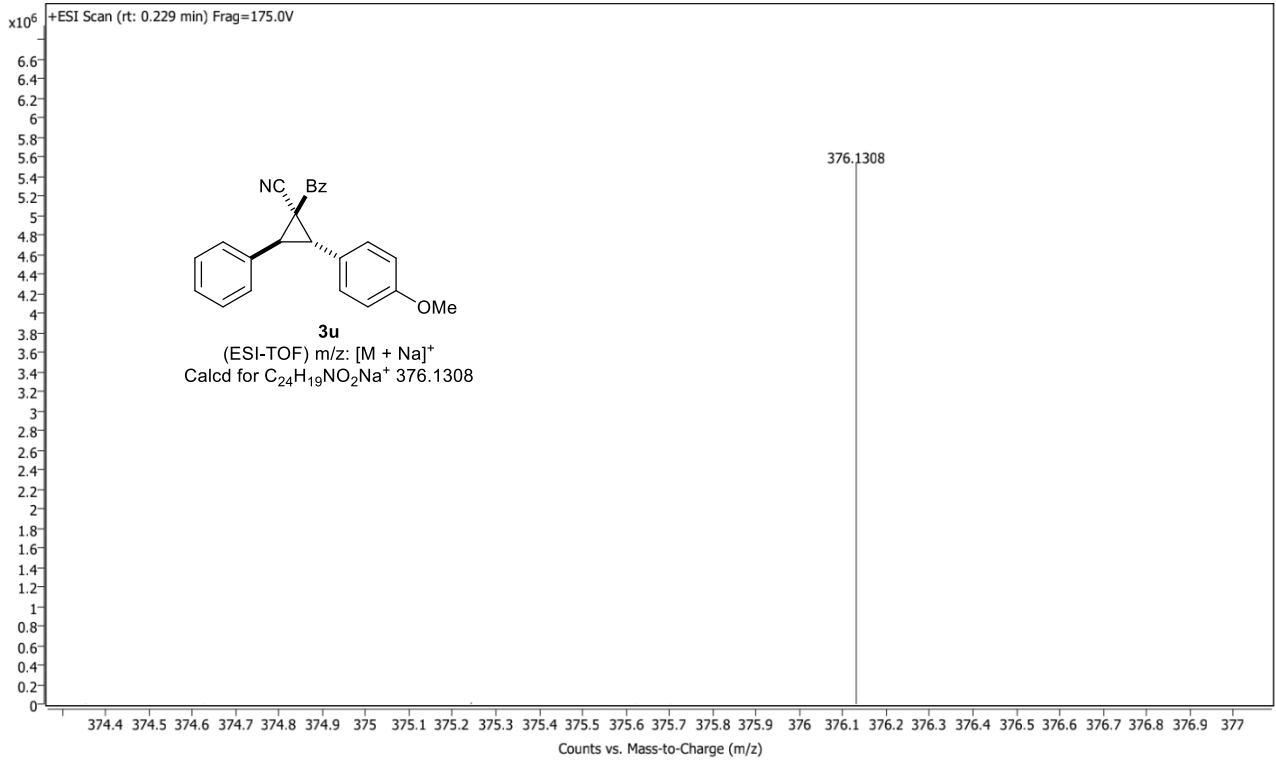

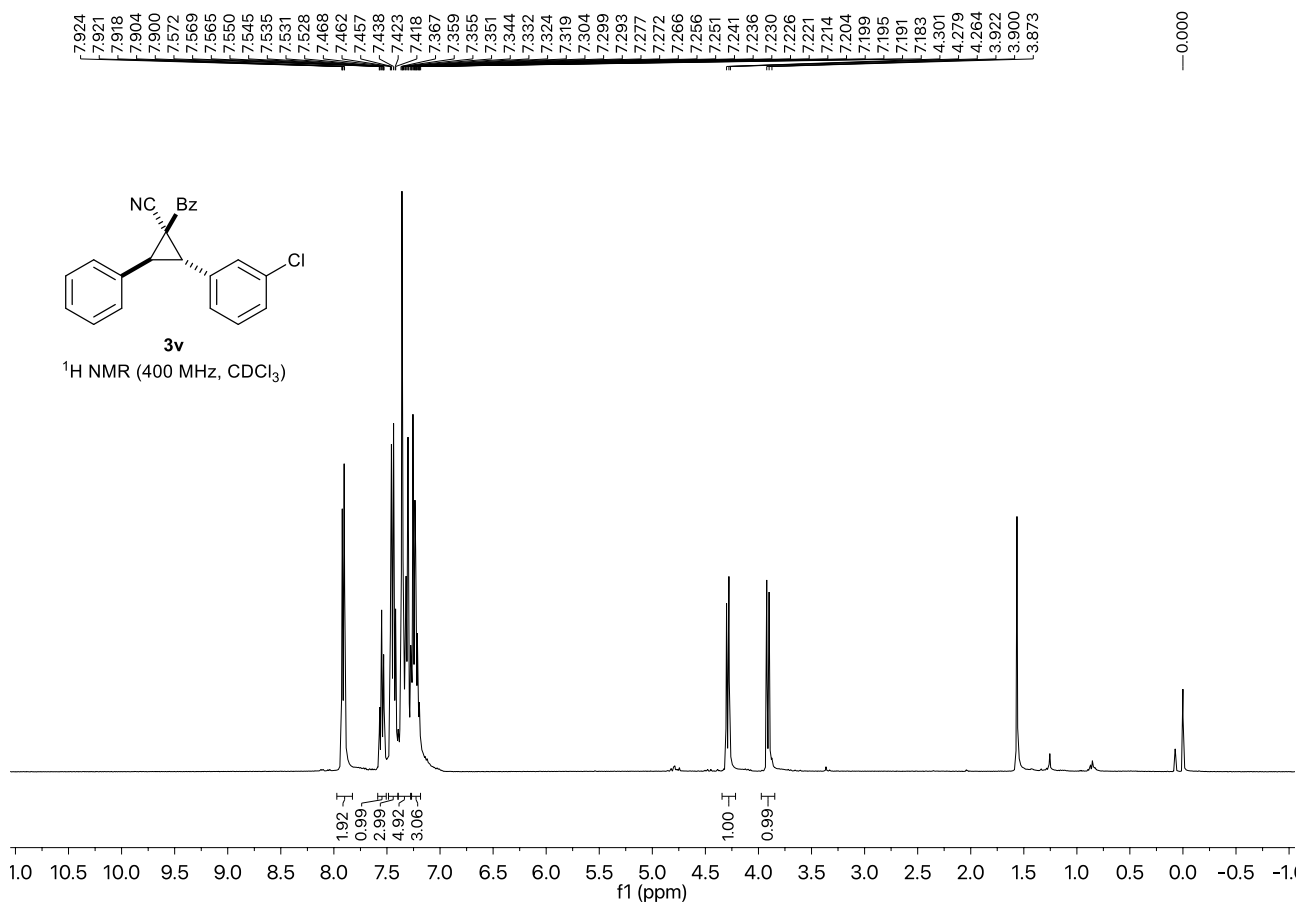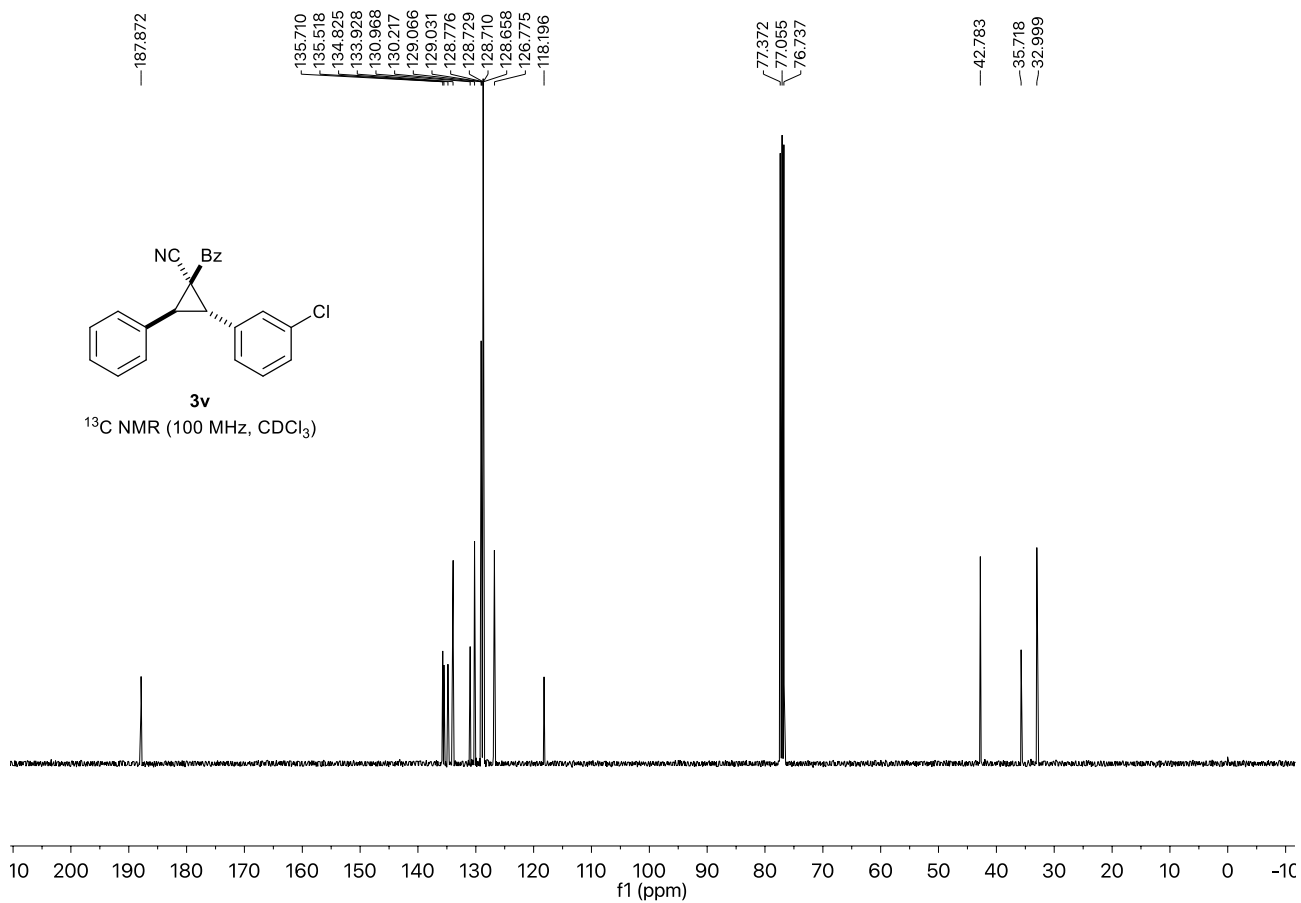



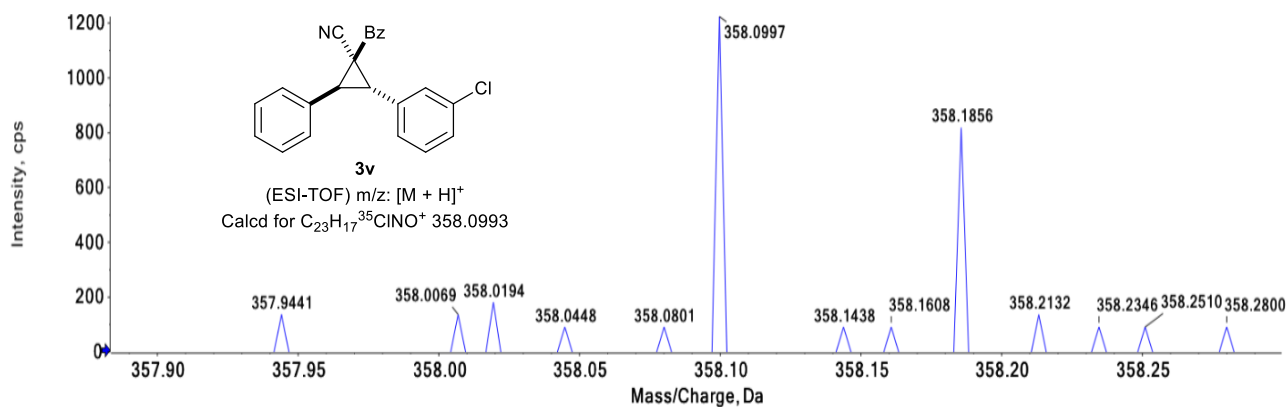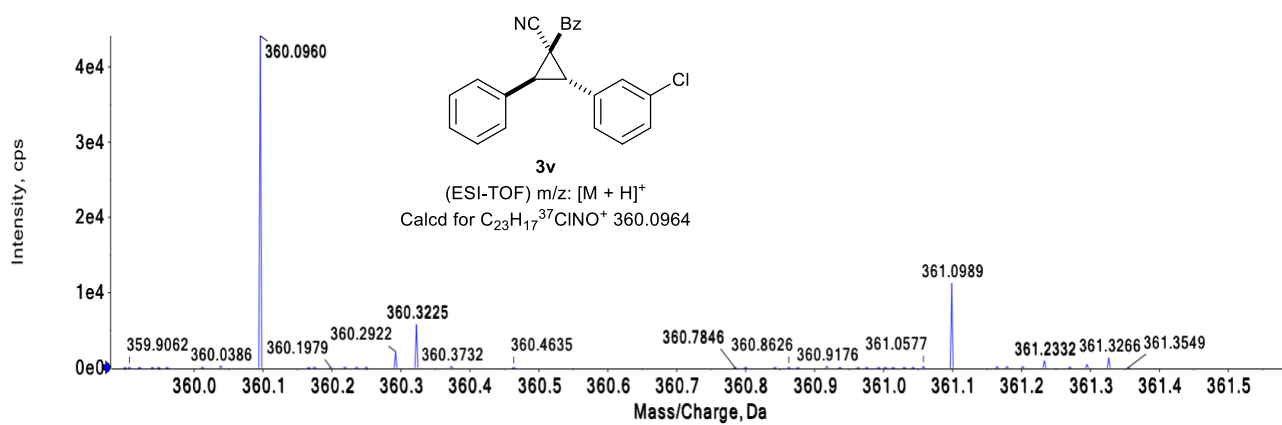

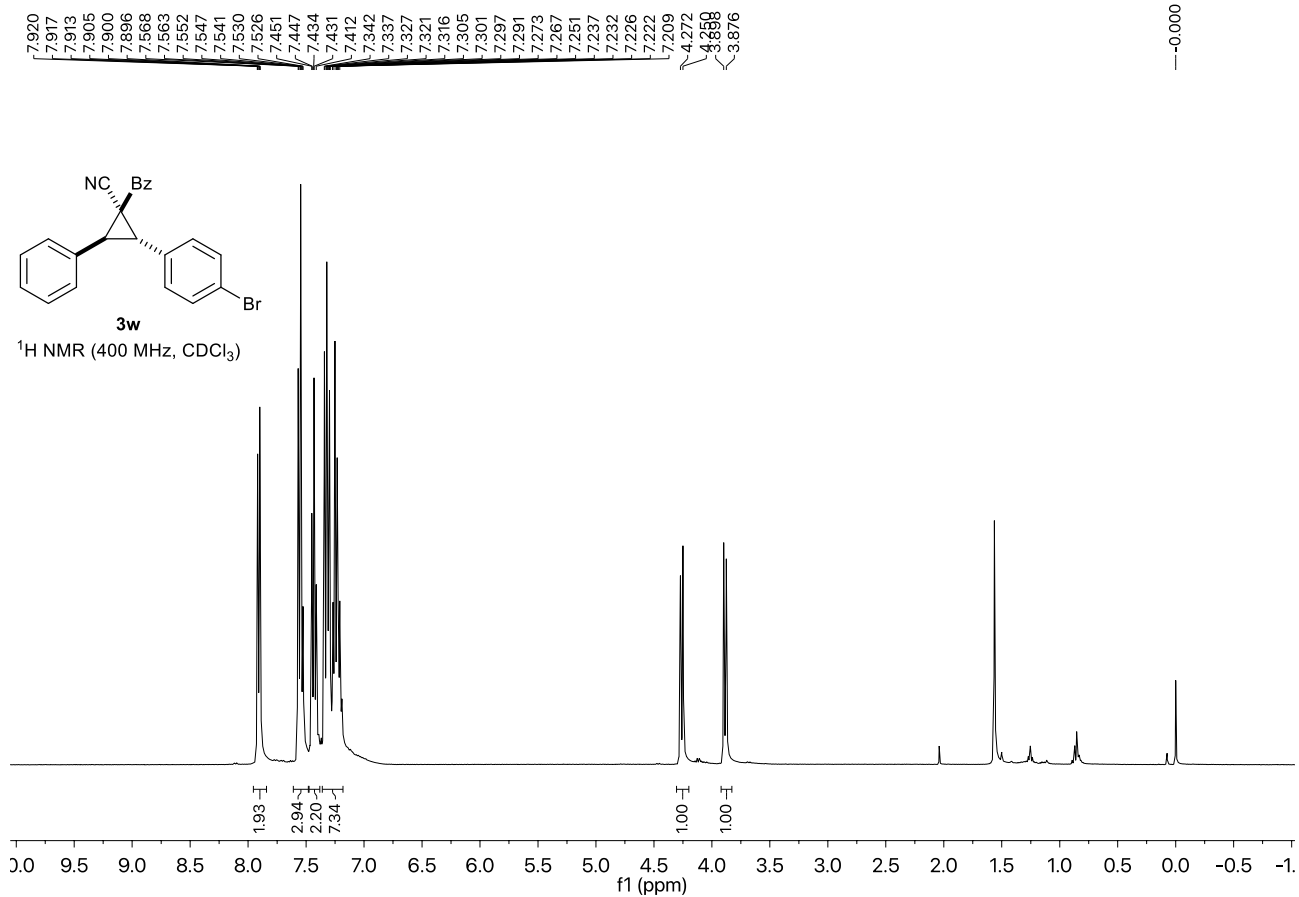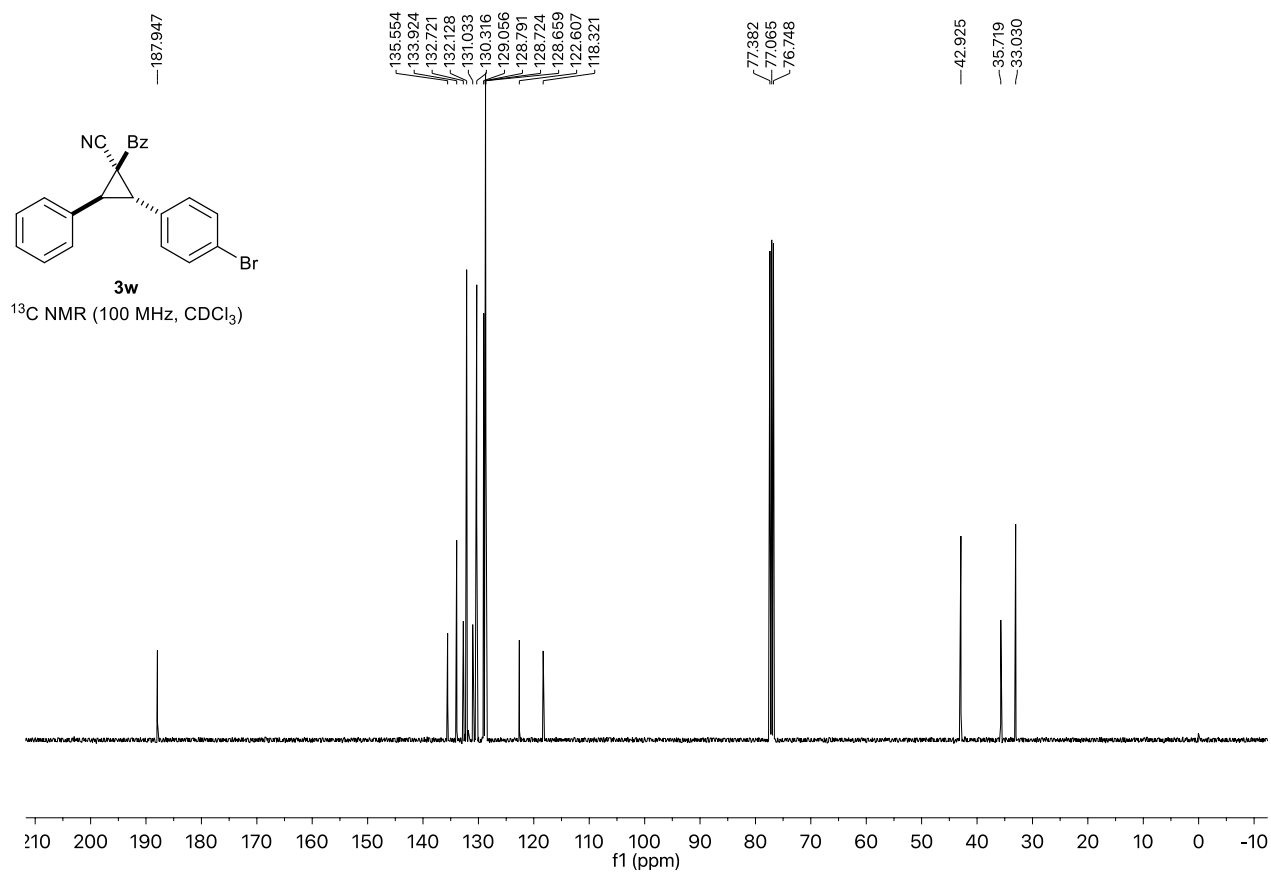

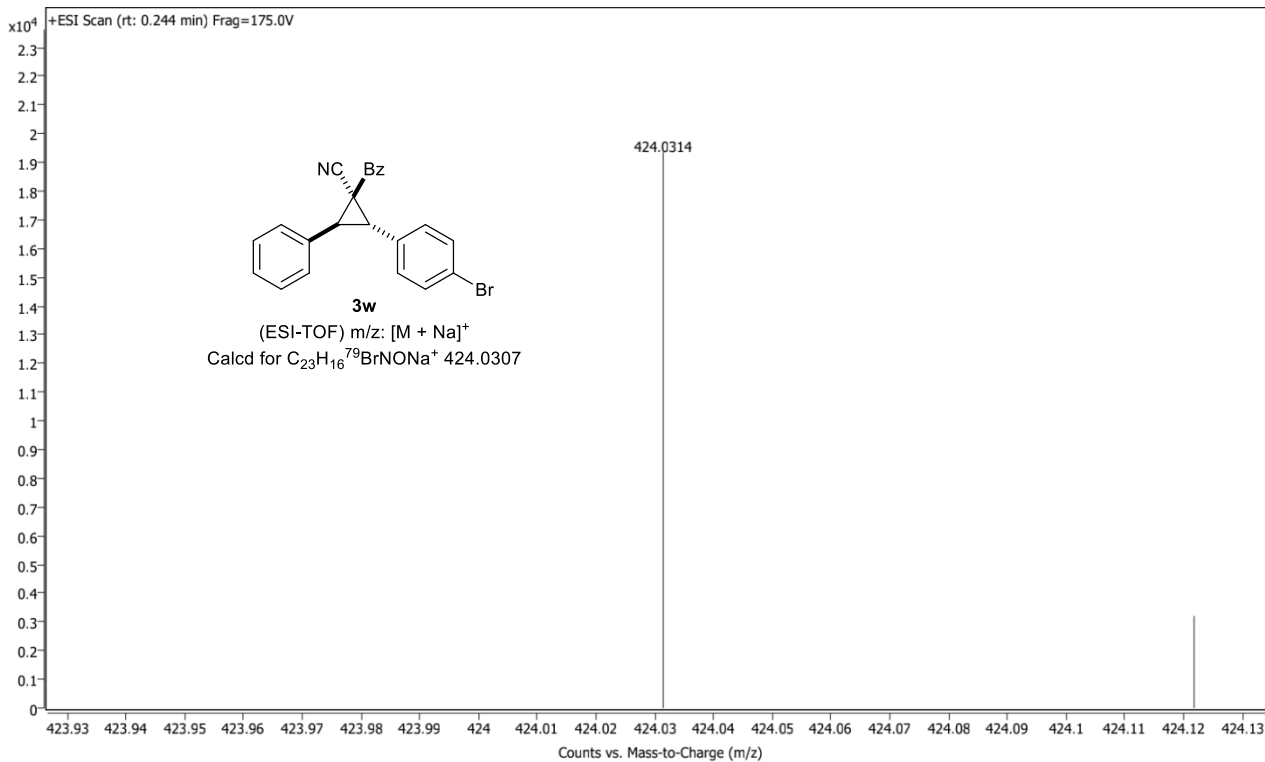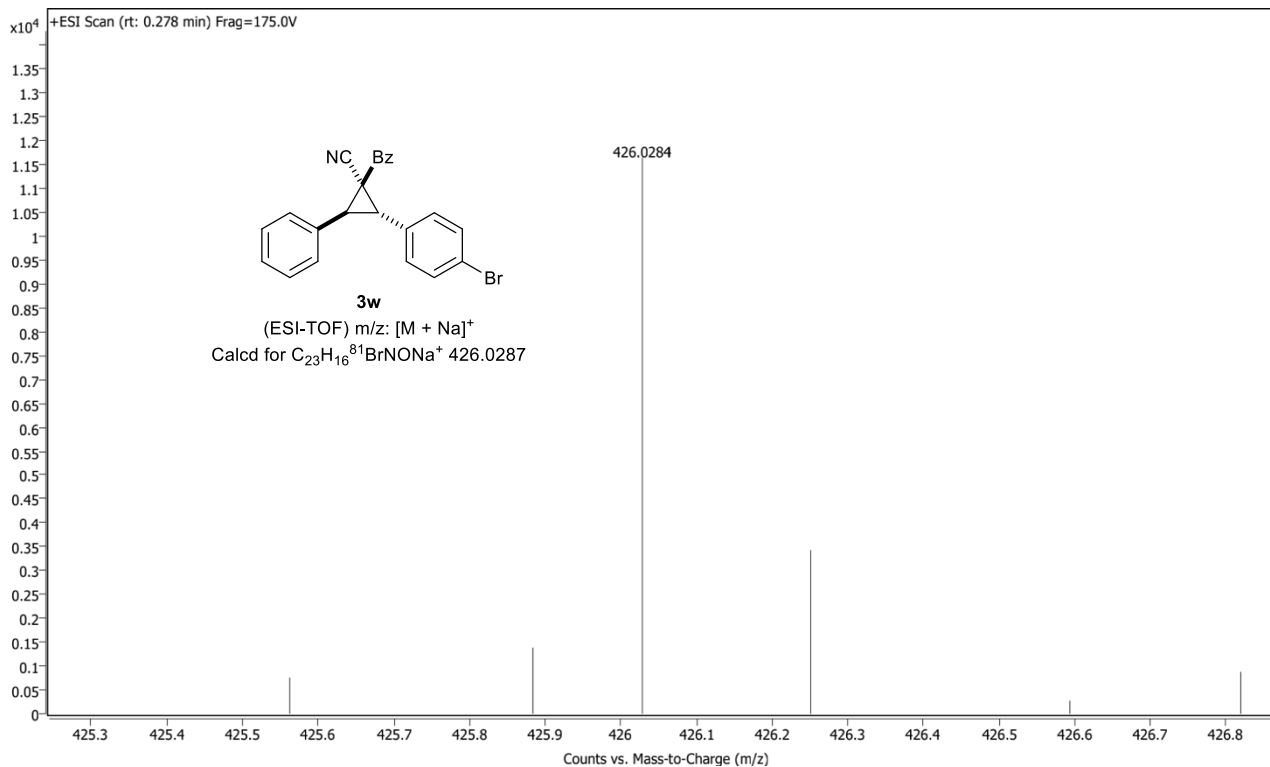

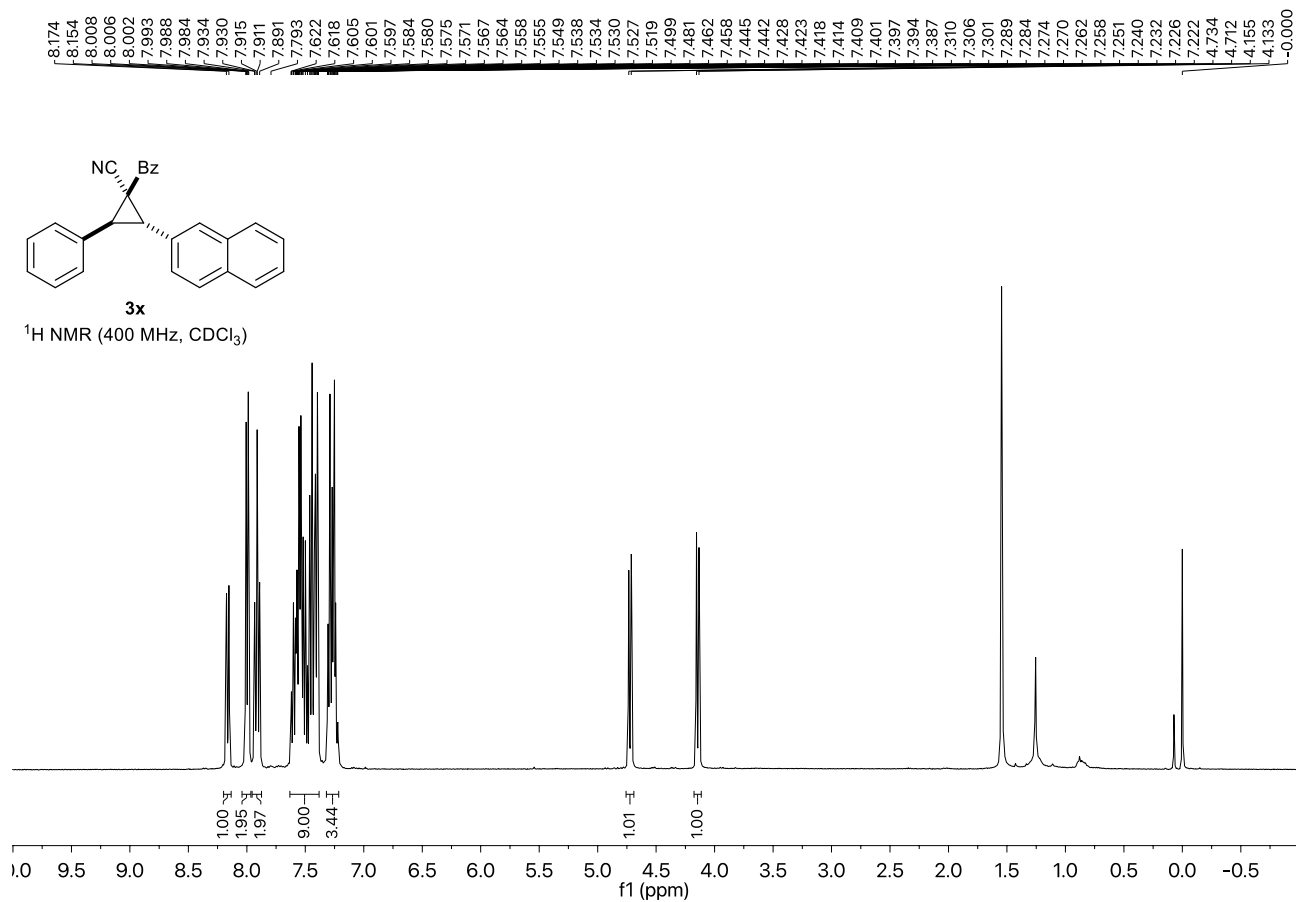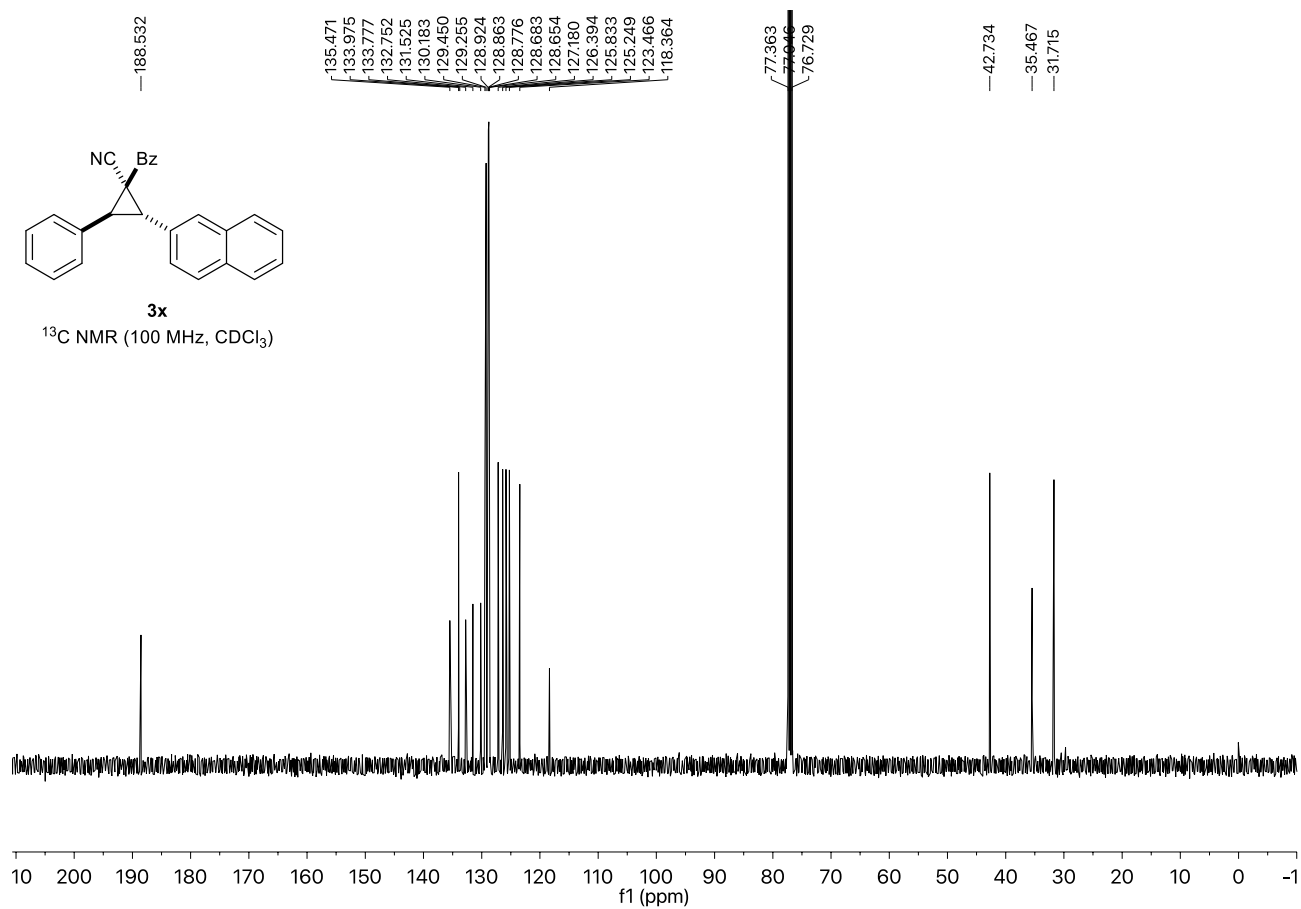

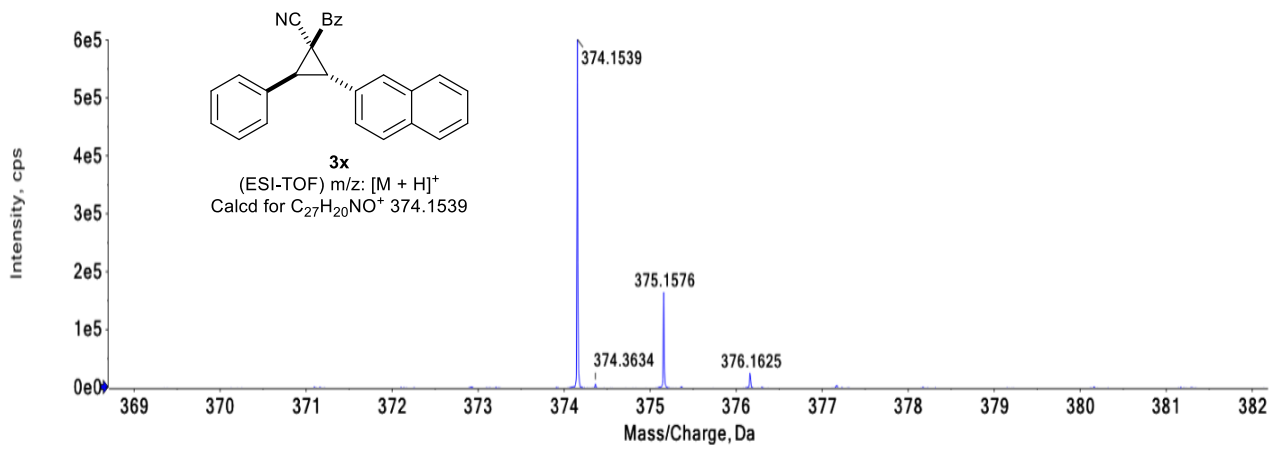

7.908  
7.905  
7.901  
7.892  
7.887  
7.883  
7.866  
7.563  
7.559  
7.549  
7.544  
7.539  
7.529  
7.525  
7.522  
7.509  
7.484  
7.468  
7.463  
7.451  
7.447  
7.435  
7.431  
7.417  
7.412  
7.306  
7.301  
7.296  
7.290  
7.286  
7.282  
7.275  
7.265  
7.261  
7.255  
7.244  
7.239  
7.225  
7.219  
7.214  
7.210  
7.202  
7.192  
7.188  
7.184  
7.180  
6.504  
6.495  
6.440  
6.436  
6.432  
6.428  
4.270  
4.248  
4.015  
3.993

---0.000

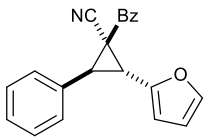

**3y**

<sup>1</sup>H NMR (400 MHz, CDCl<sub>3</sub>)

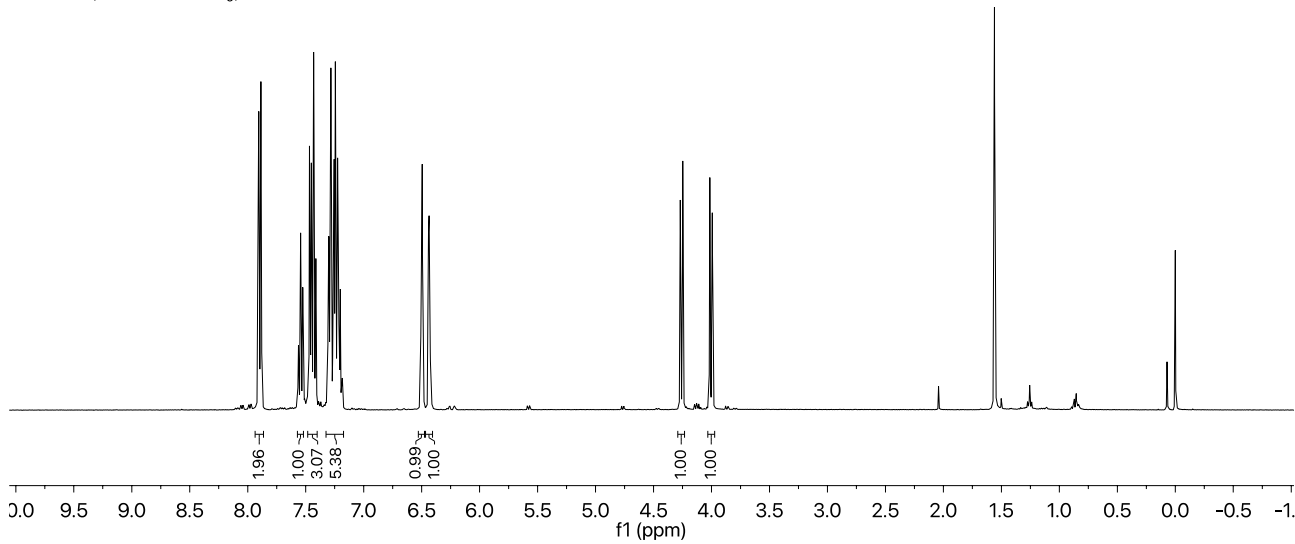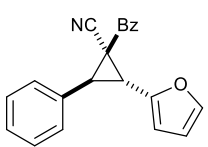

**3y**

<sup>13</sup>C NMR (100 MHz, CDCl<sub>3</sub>)

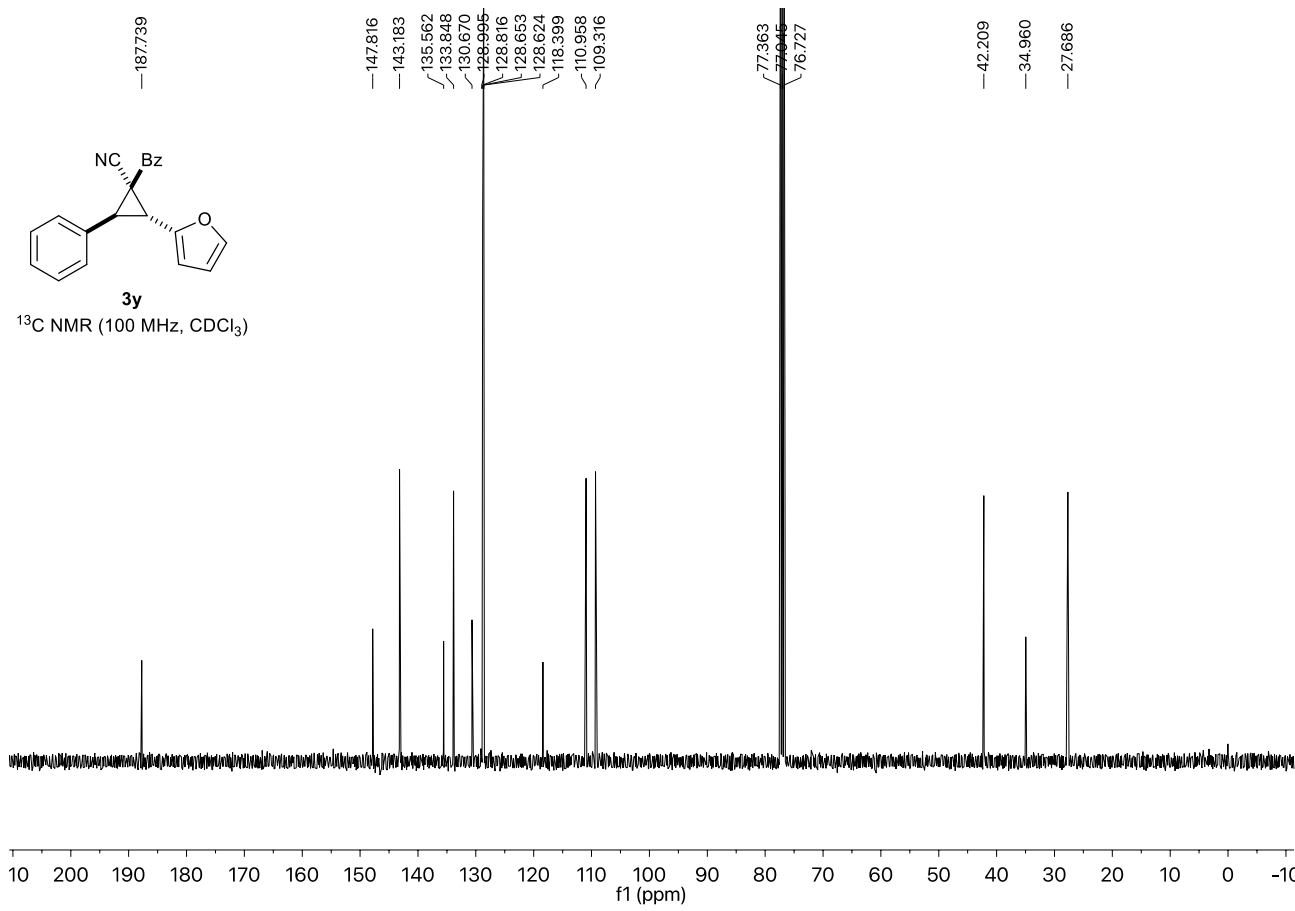

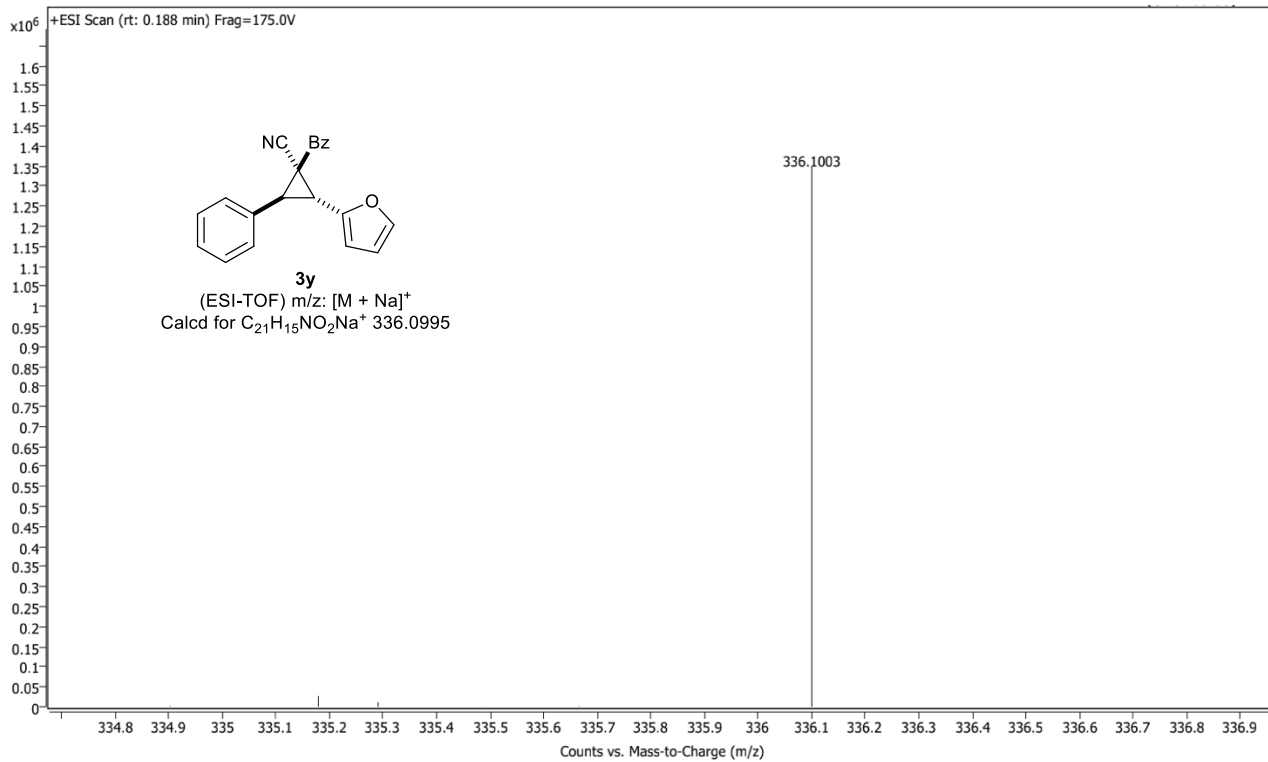

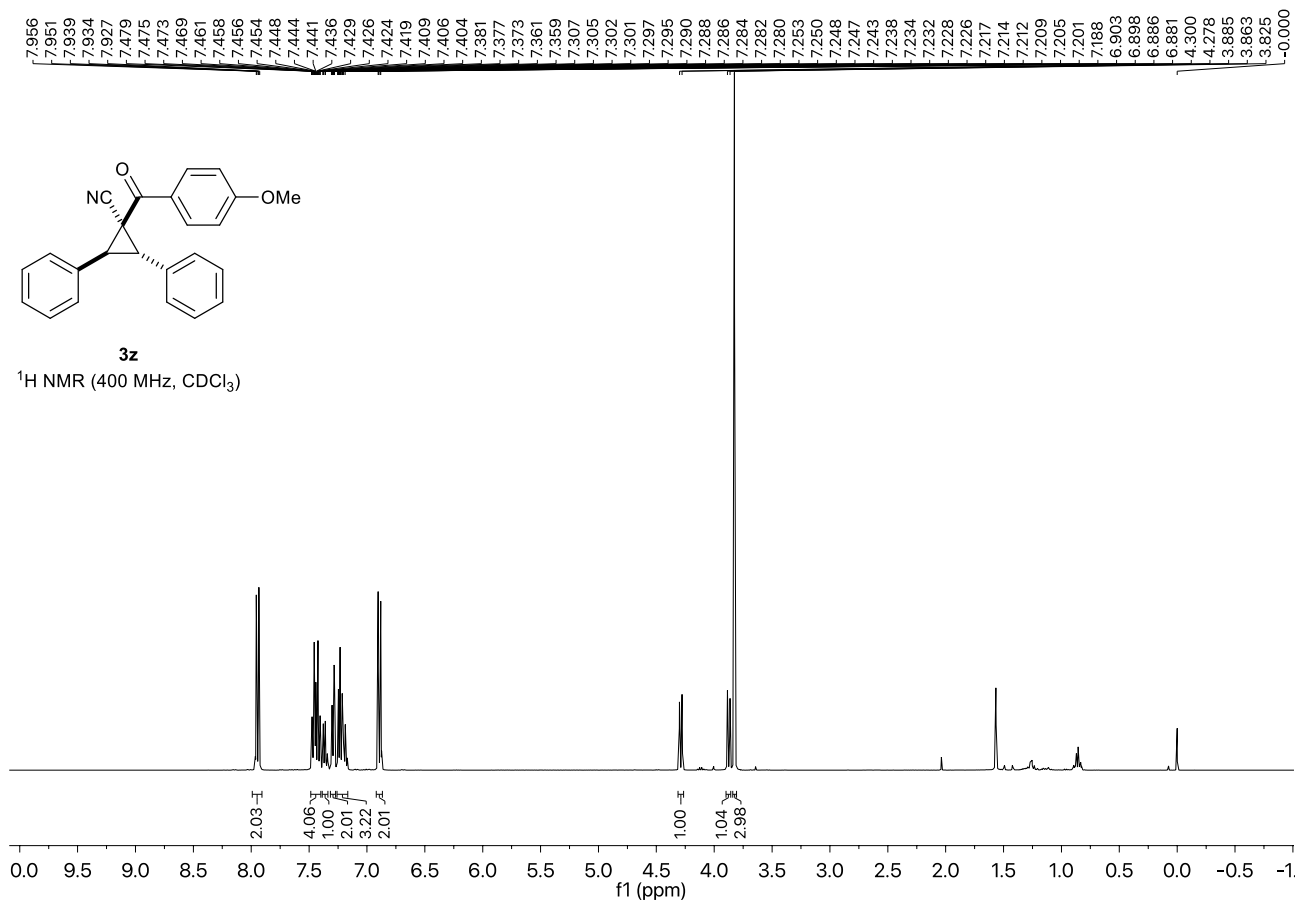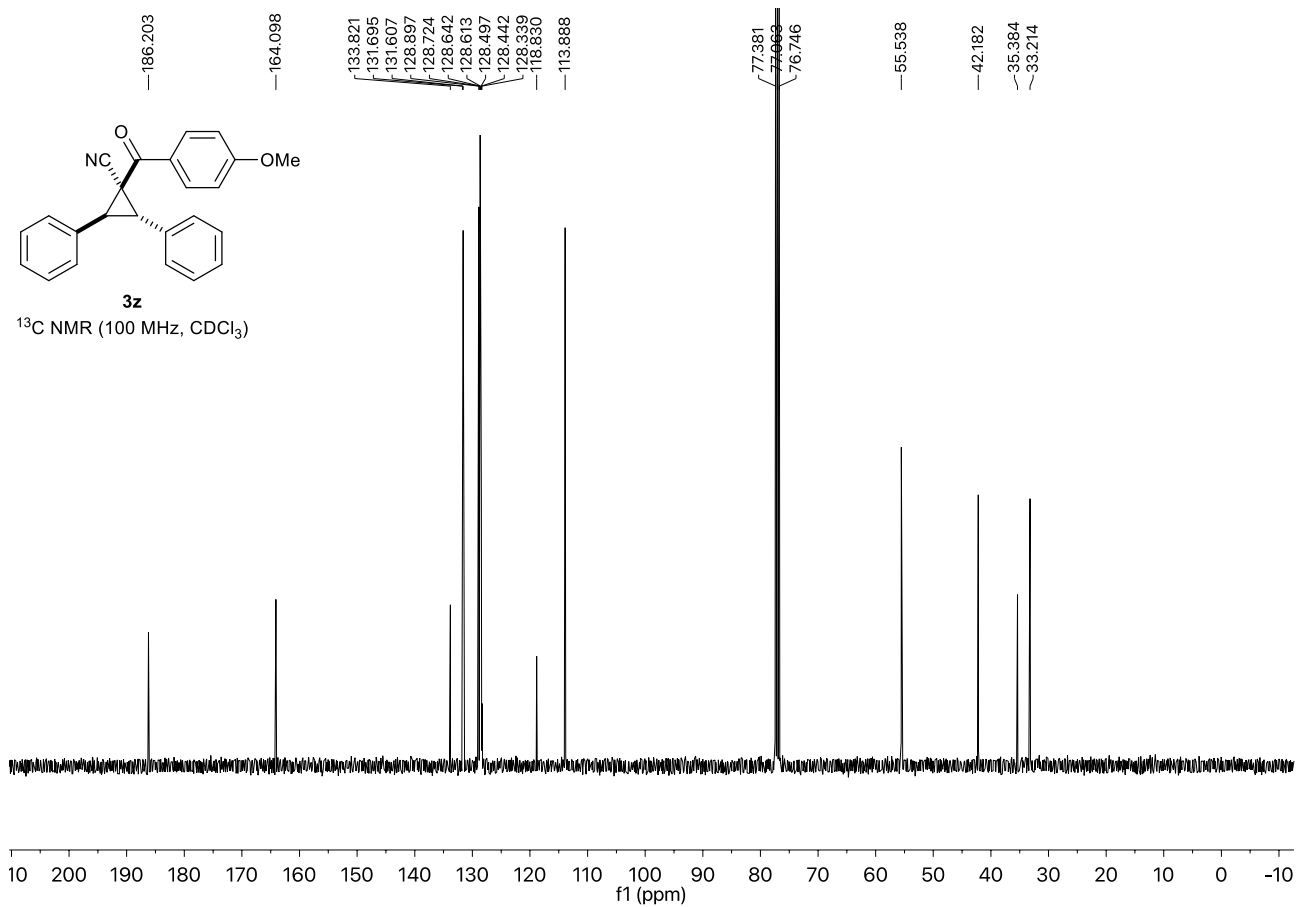



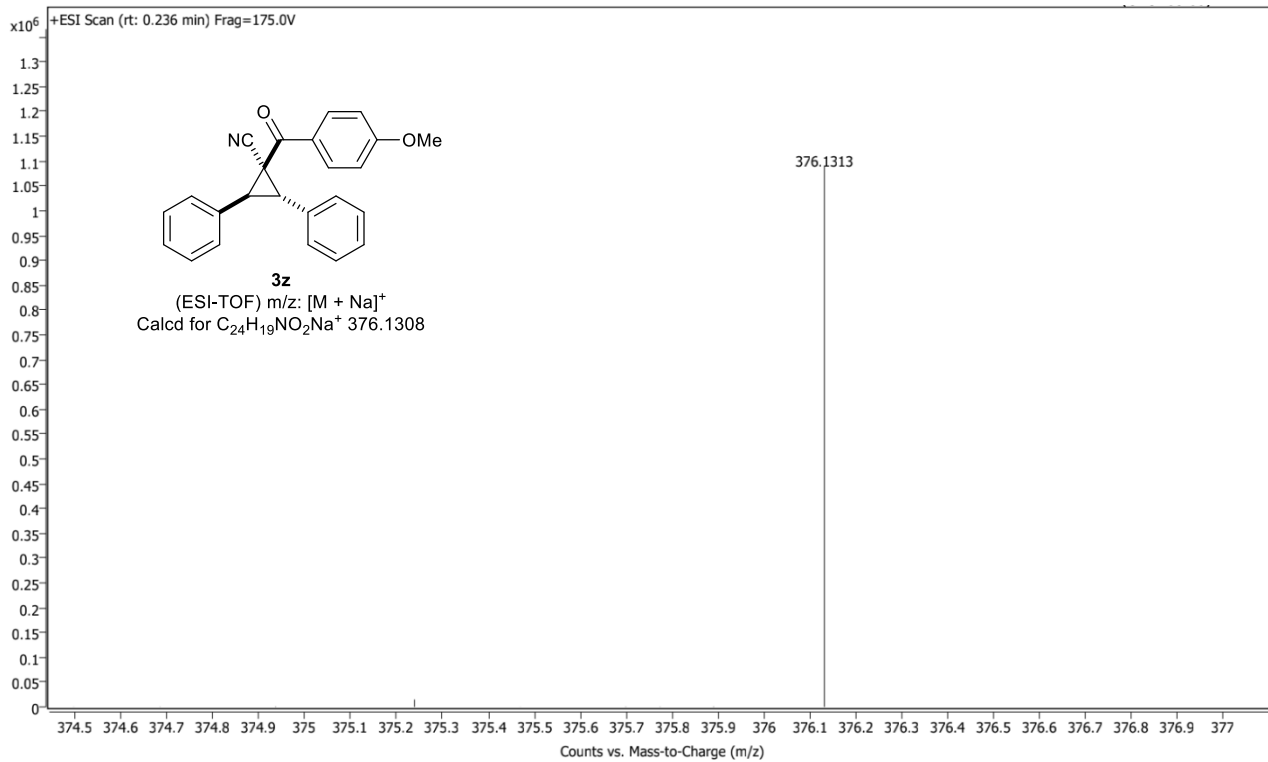

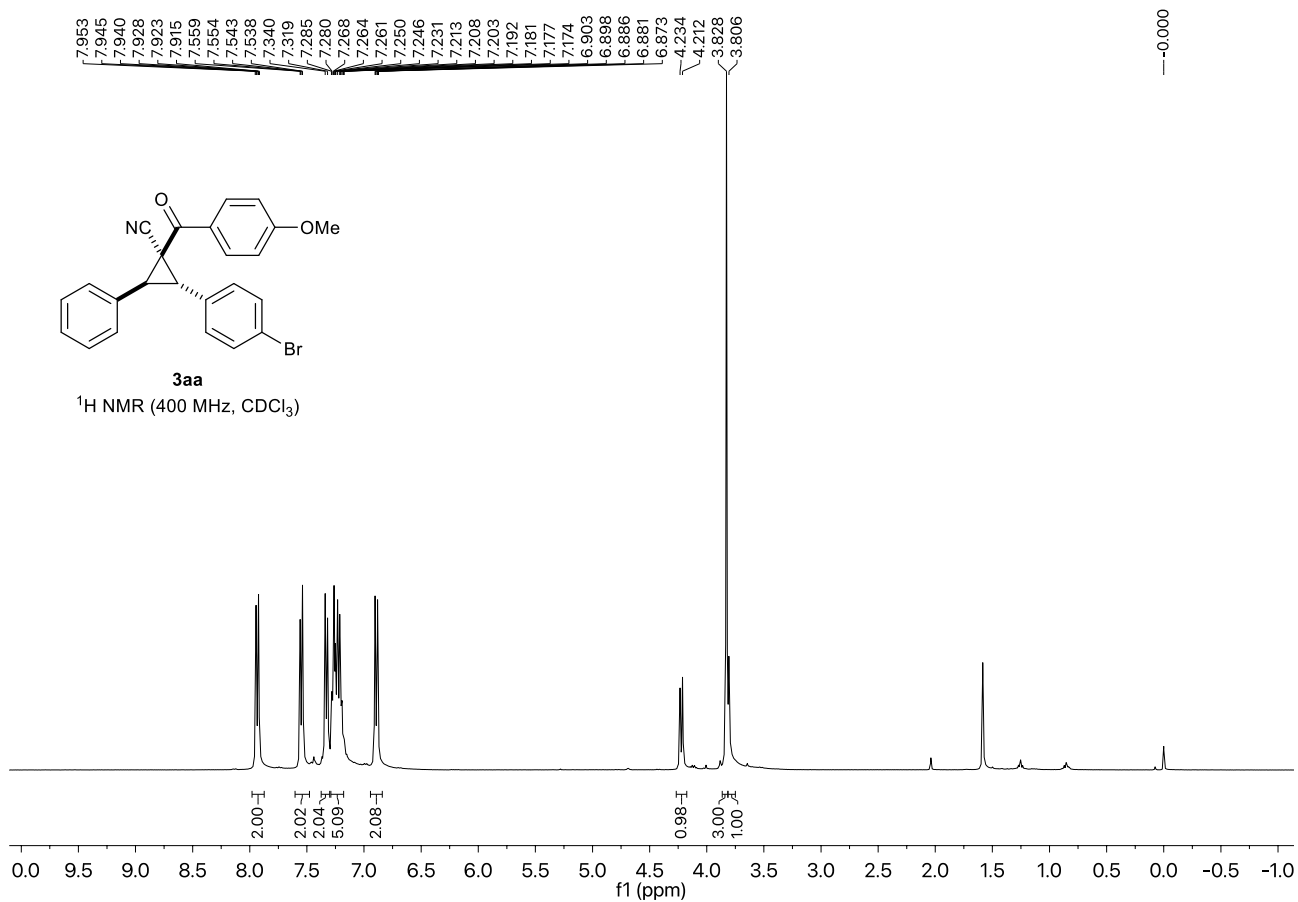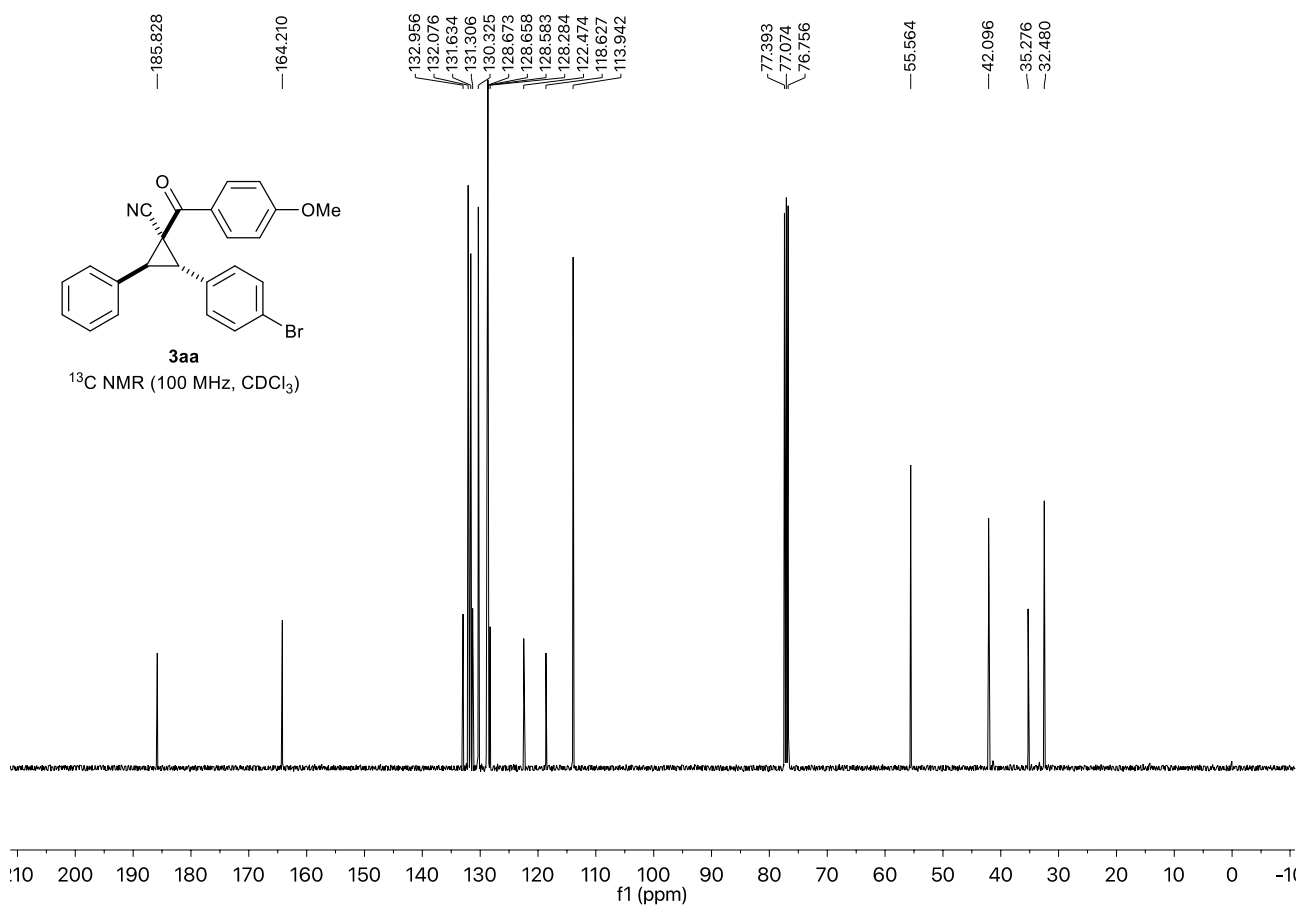

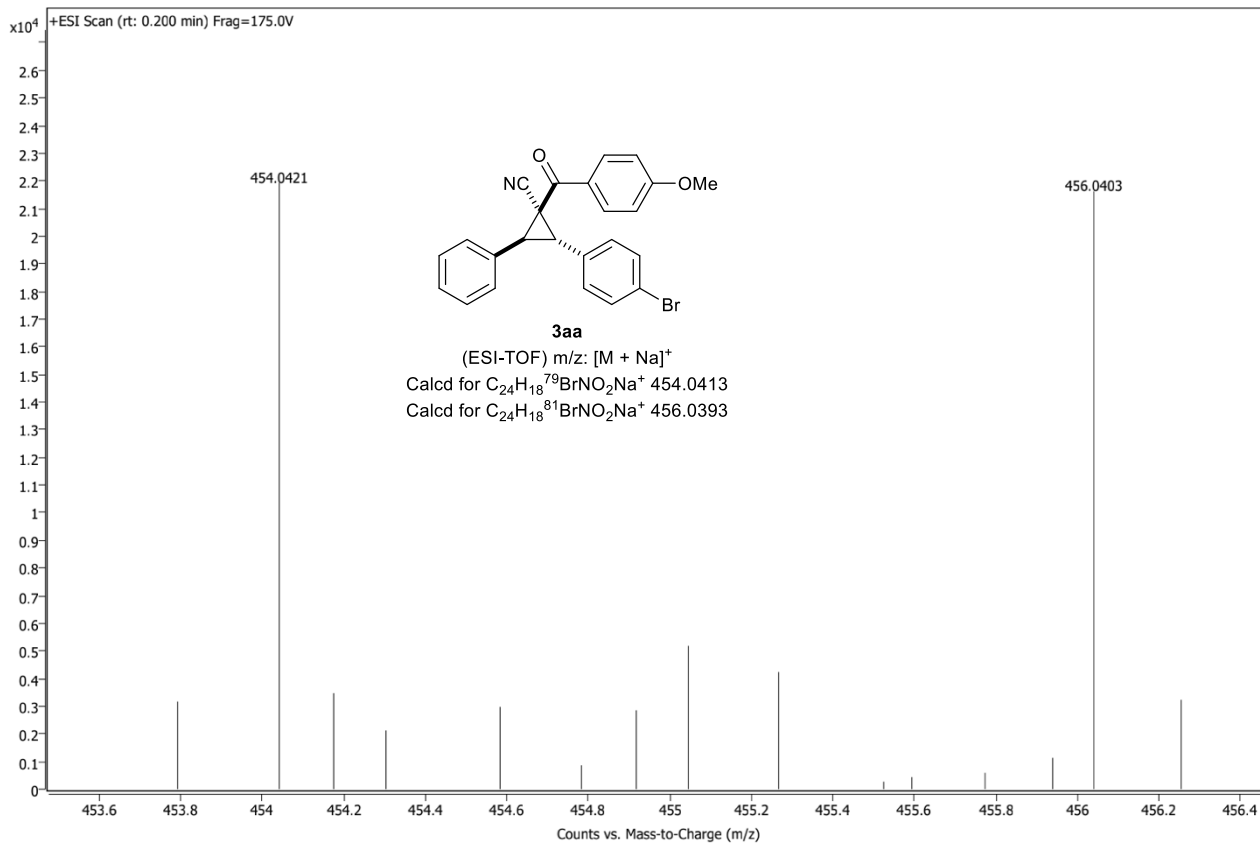

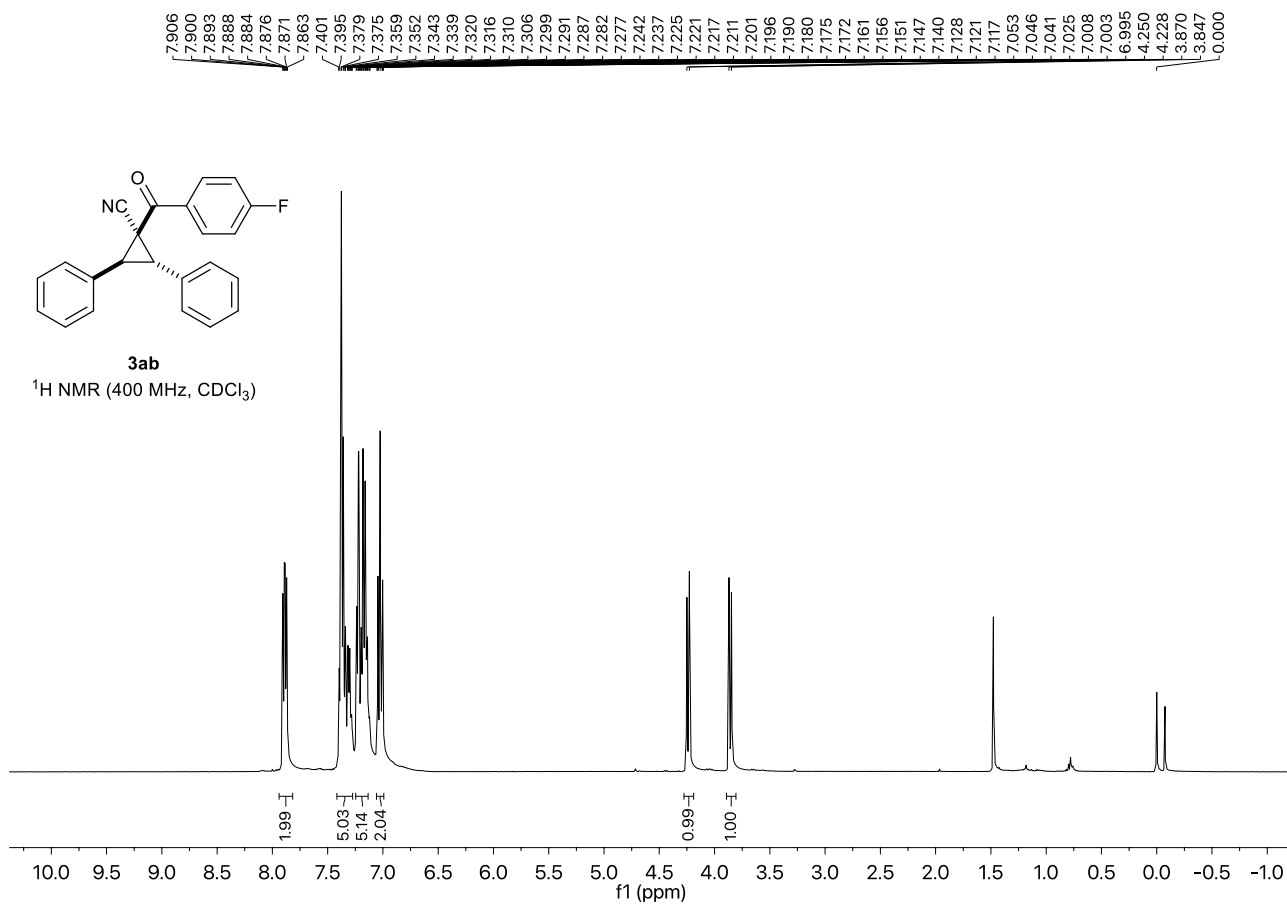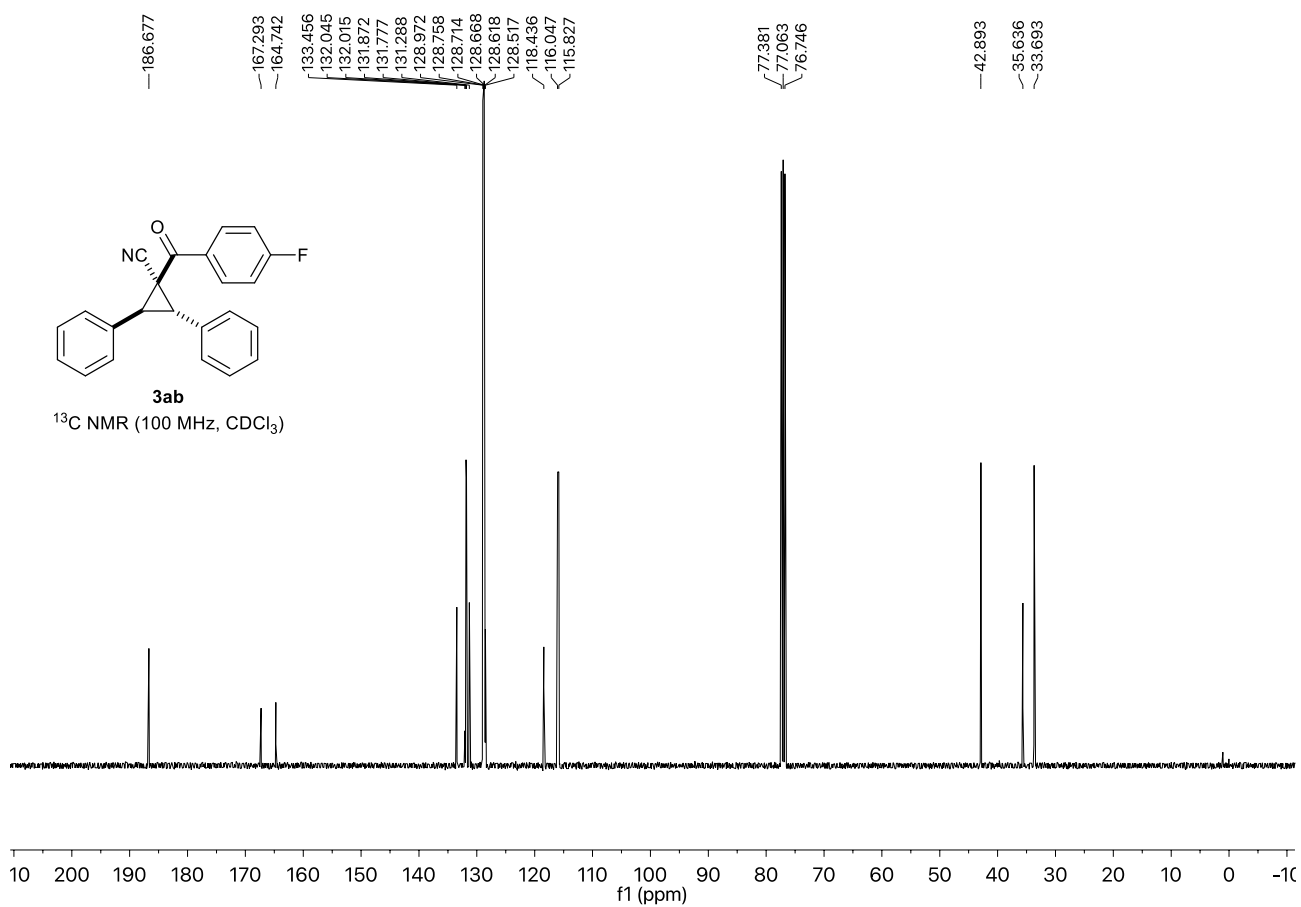

-103.046  
-103.060  
-103.068  
-103.074  
-103.082  
-103.094  
-103.104  
-103.119  
-103.135

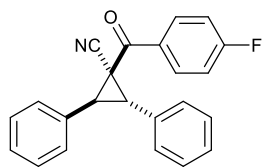

**3ab**

$^{19}\text{F}$  NMR (376 MHz,  $\text{CDCl}_3$ )

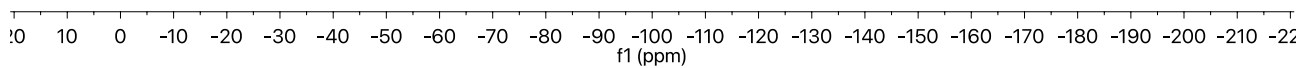

$\times 10^5$  +ESI Scan (rt: 0.216 min) Frag=175.0V

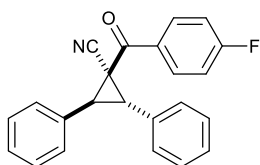

**3ab**

(ESI-TOF) m/z:  $[\text{M} + \text{Na}]^+$   
Calcd for  $\text{C}_{23}\text{H}_{16}\text{FNONa}^+$  364.1108

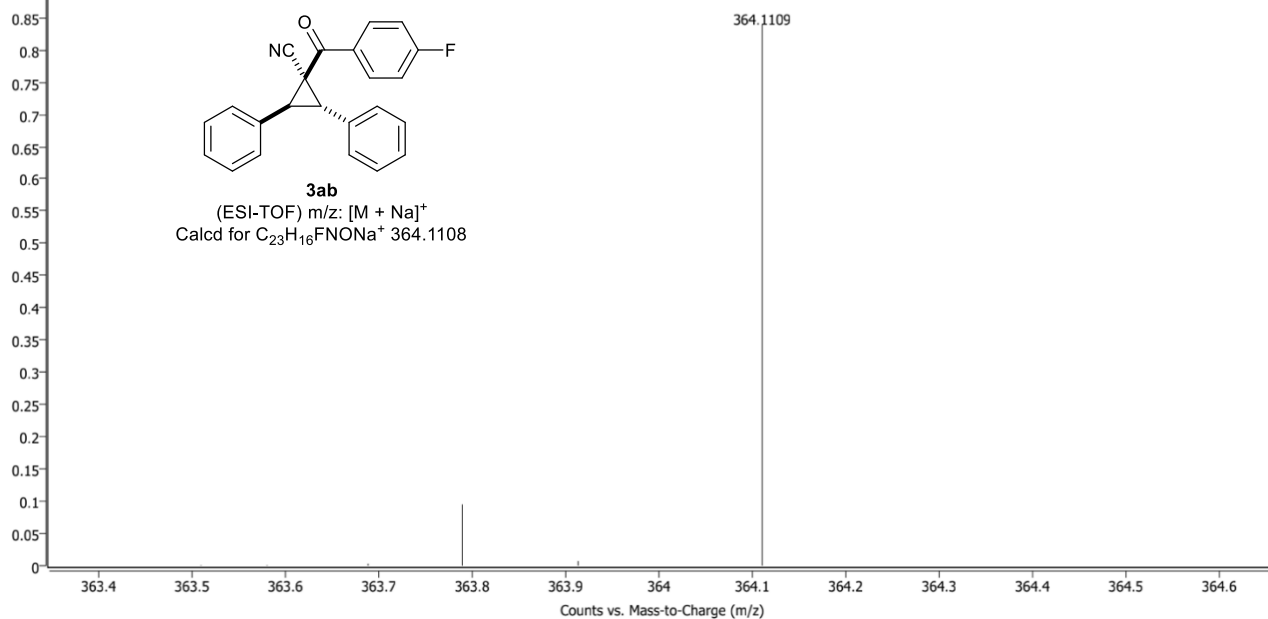

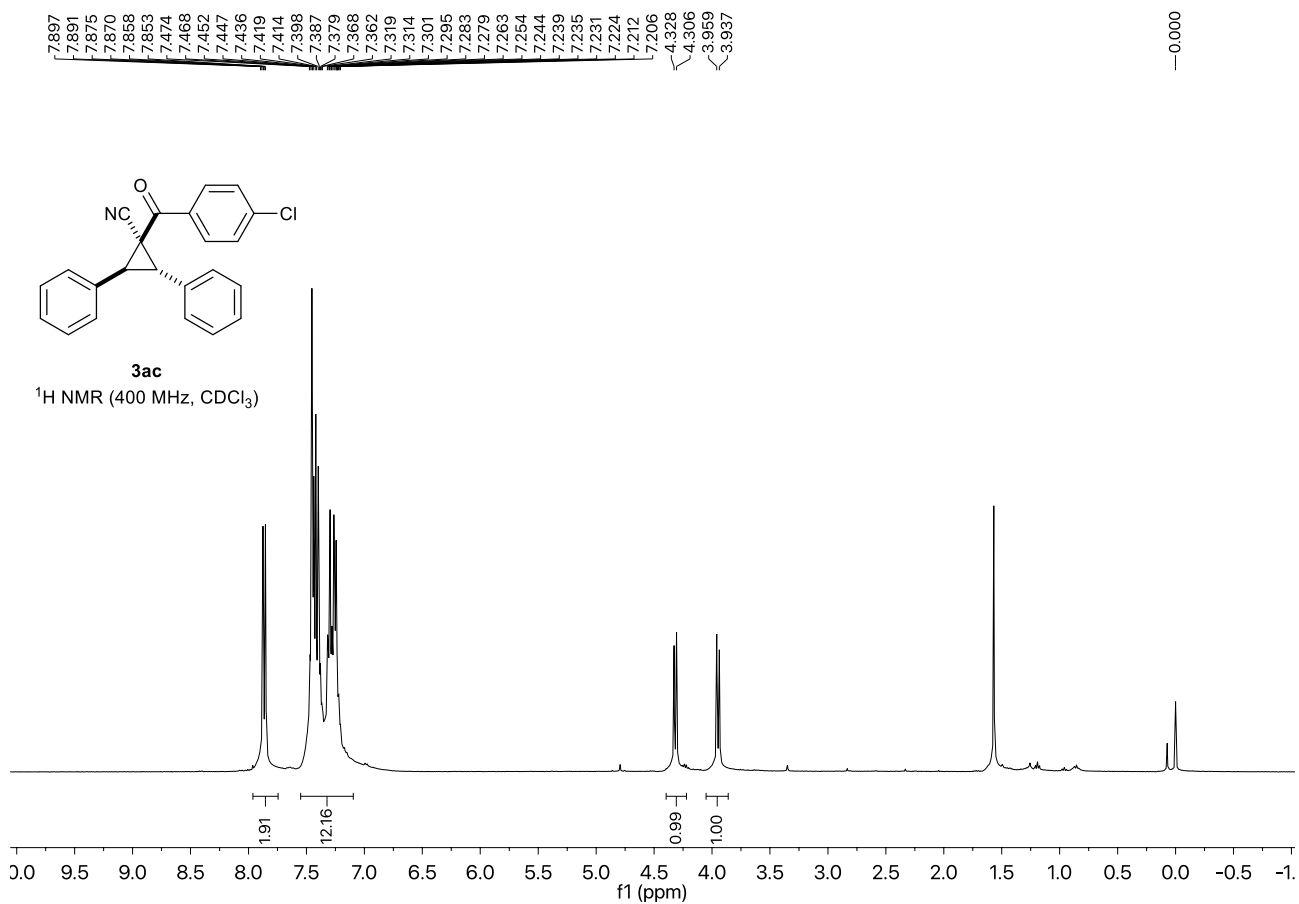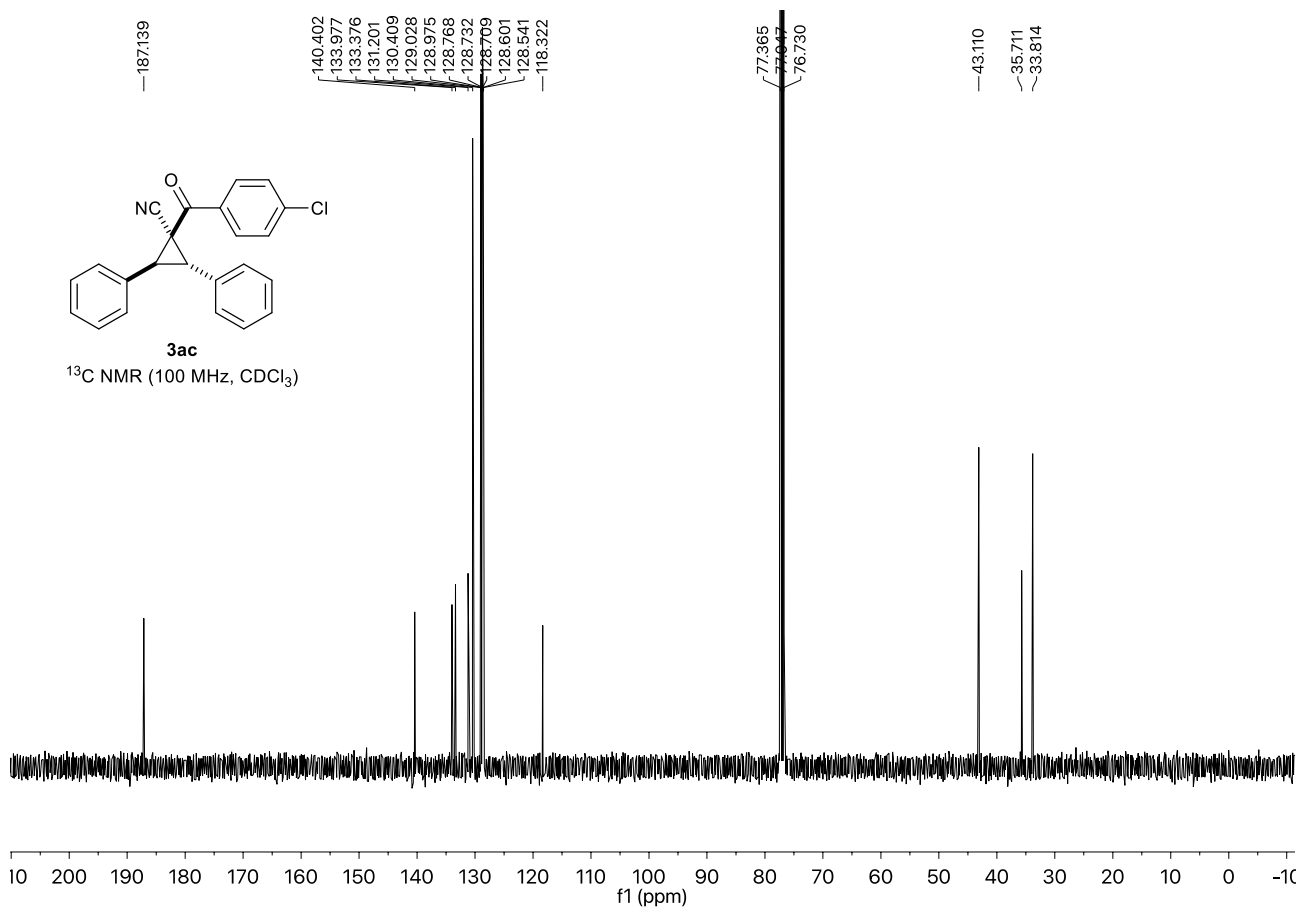

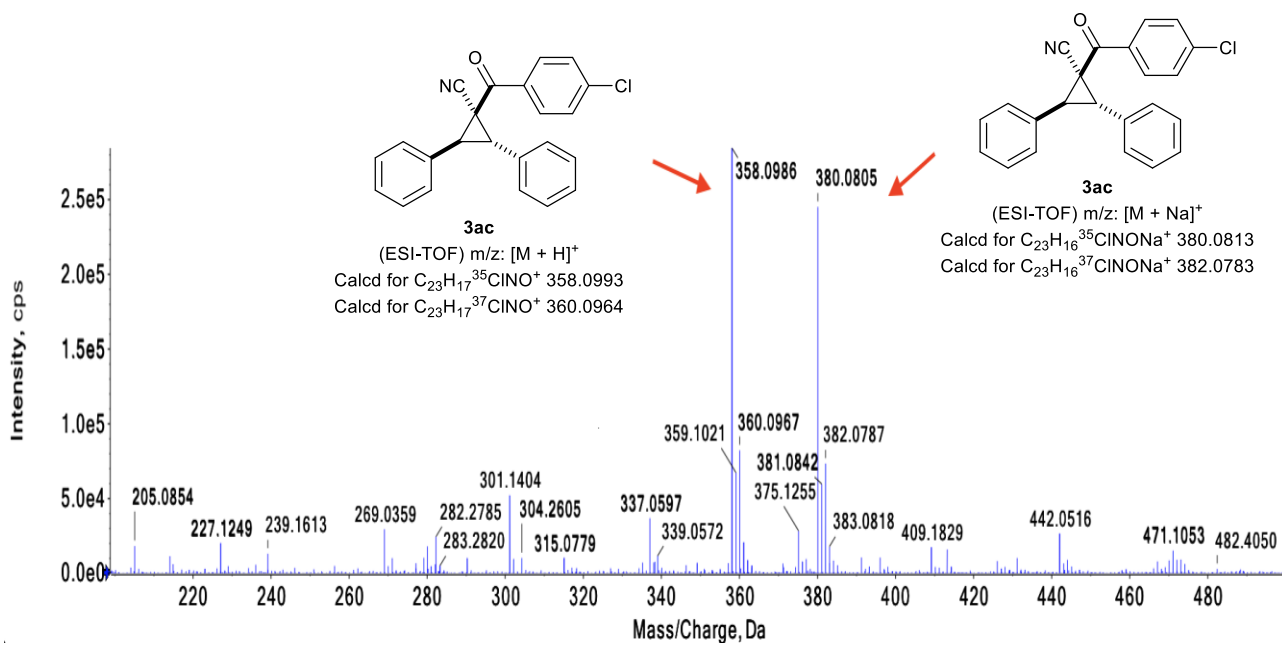

8.201  
8.180  
7.995  
7.972  
7.963  
7.951  
7.945  
7.922  
7.834  
7.816  
7.812  
7.796  
7.630  
7.581  
7.560  
7.544  
7.529  
7.508  
7.489  
7.480  
7.461  
7.441  
7.422  
7.392  
7.374  
7.367  
7.356  
7.334  
7.316  
7.297  
7.270  
7.252  
7.245  
7.231  
4.475  
4.452  
4.423  
3.976

—0.000

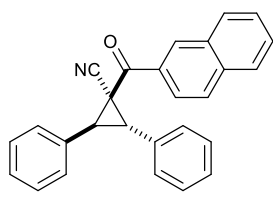

**3ad**

<sup>1</sup>H NMR (400 MHz, CDCl<sub>3</sub>)

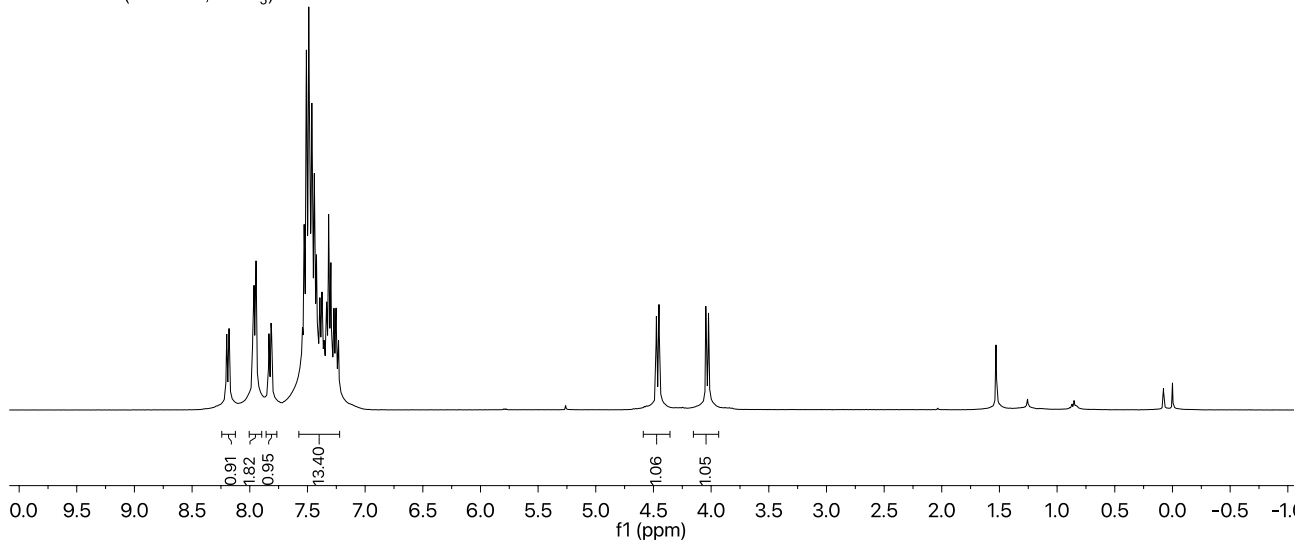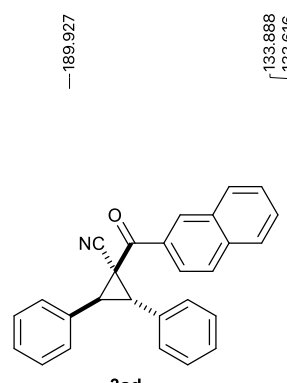

**3ad**

<sup>13</sup>C NMR (100 MHz, CDCl<sub>3</sub>)

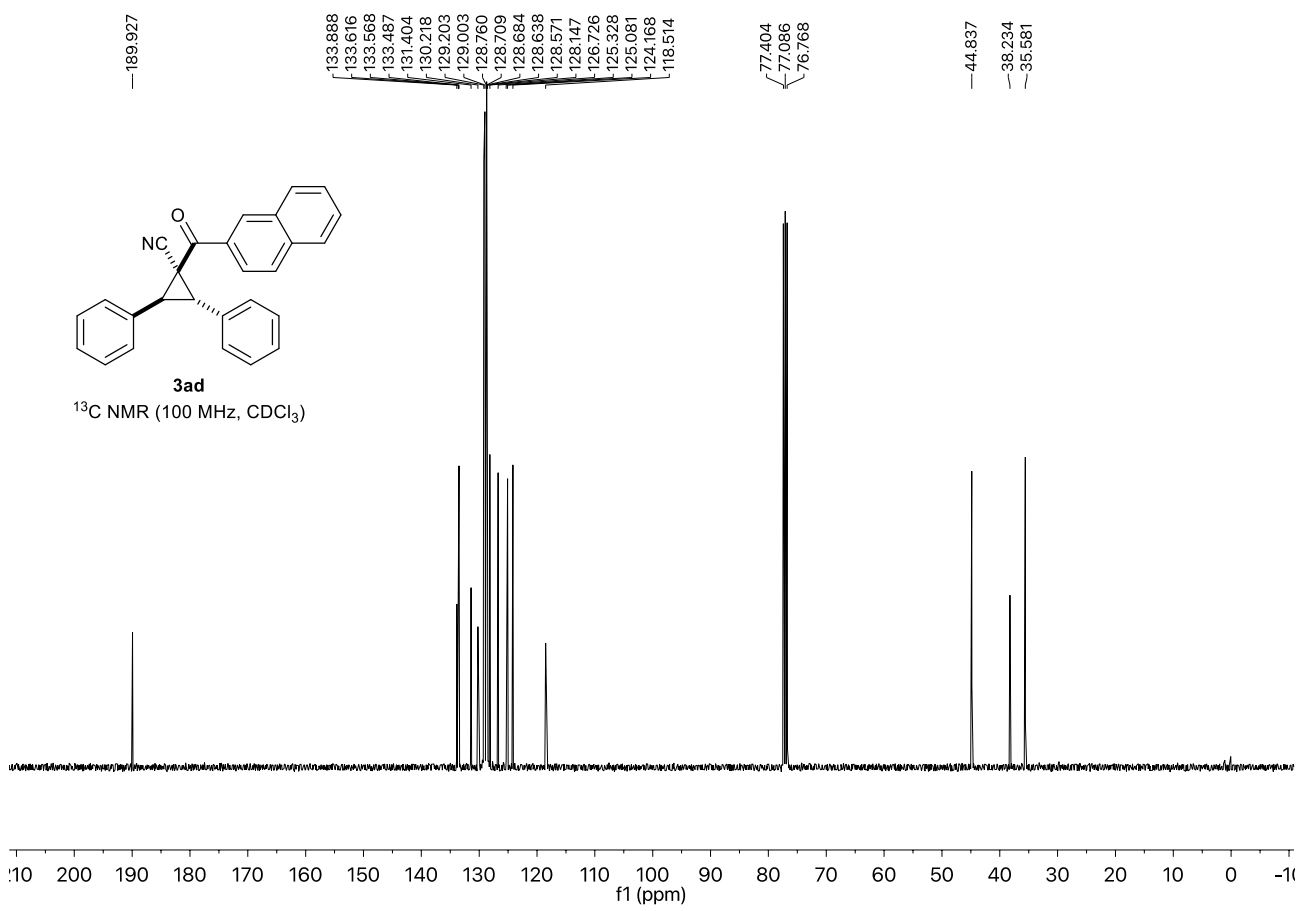



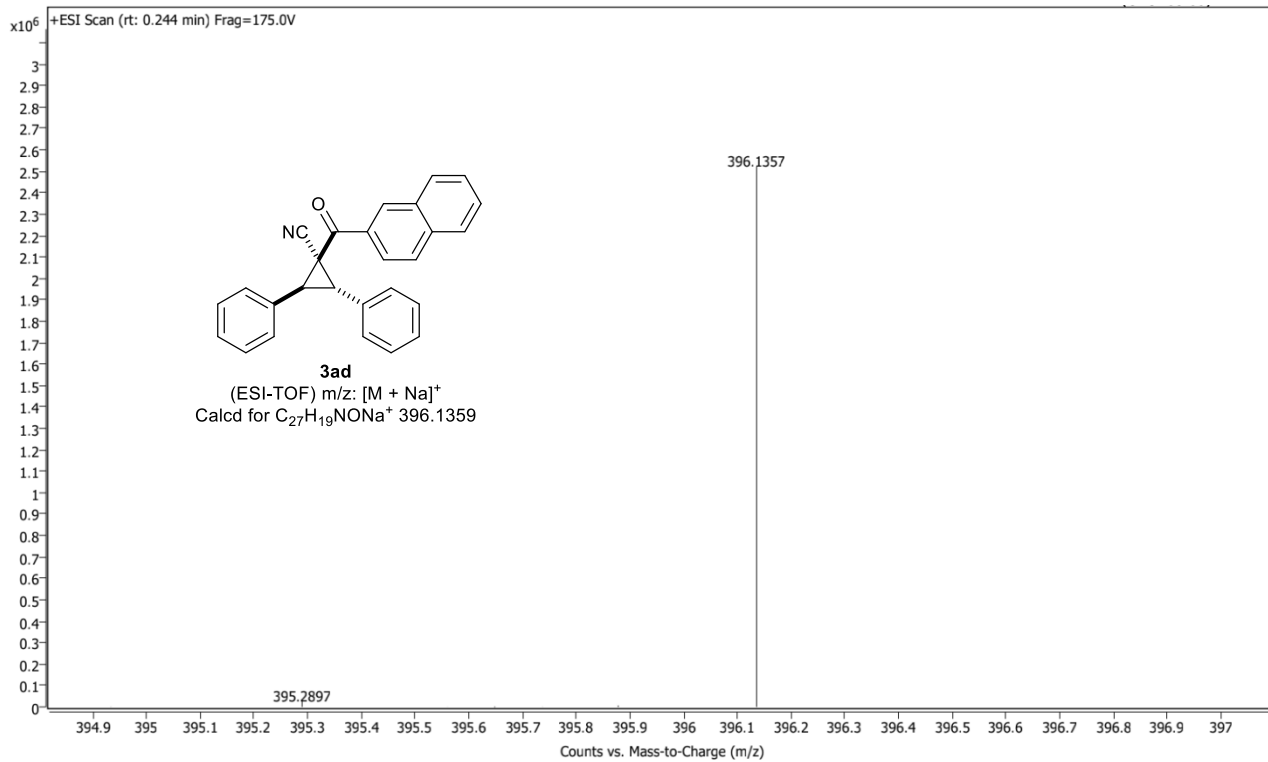

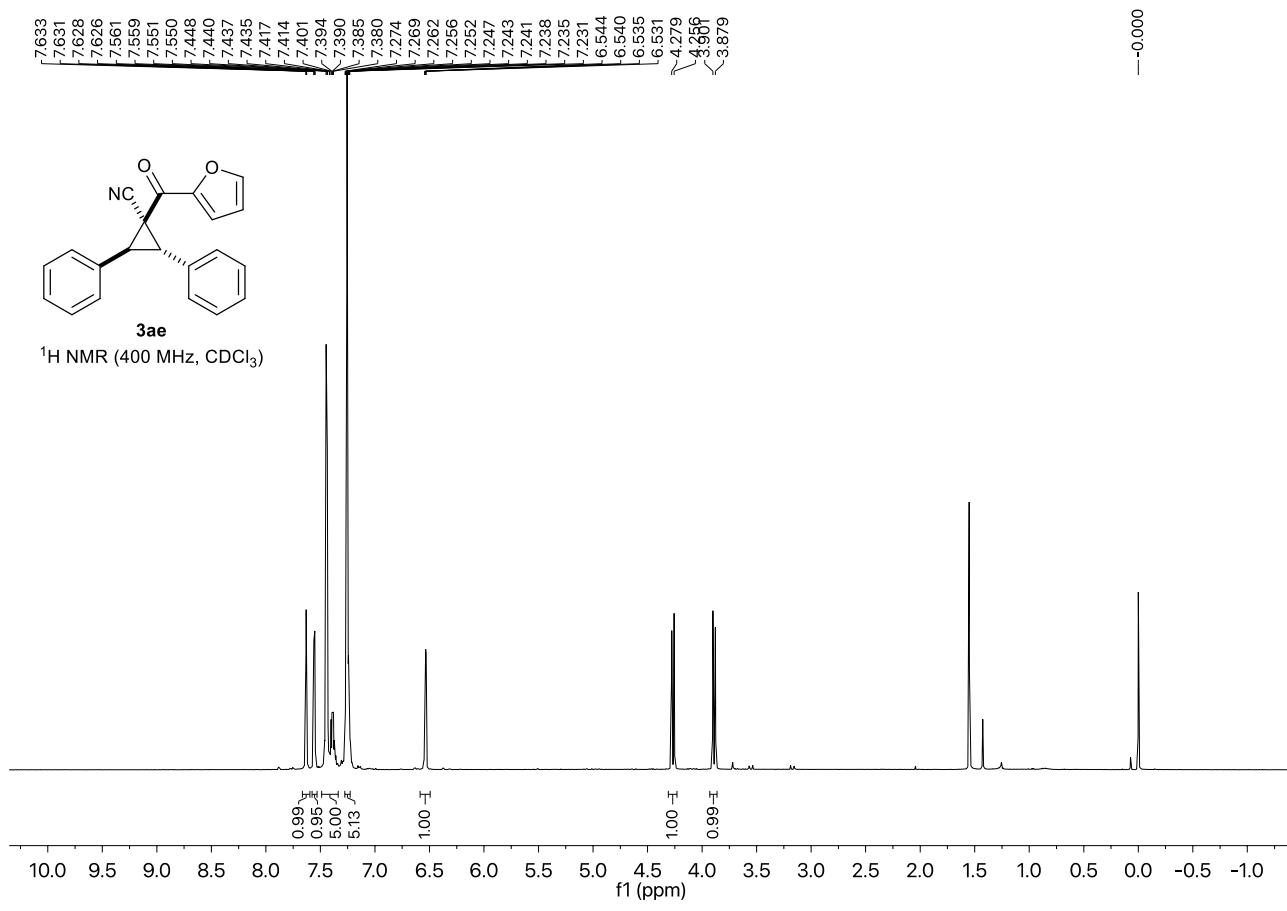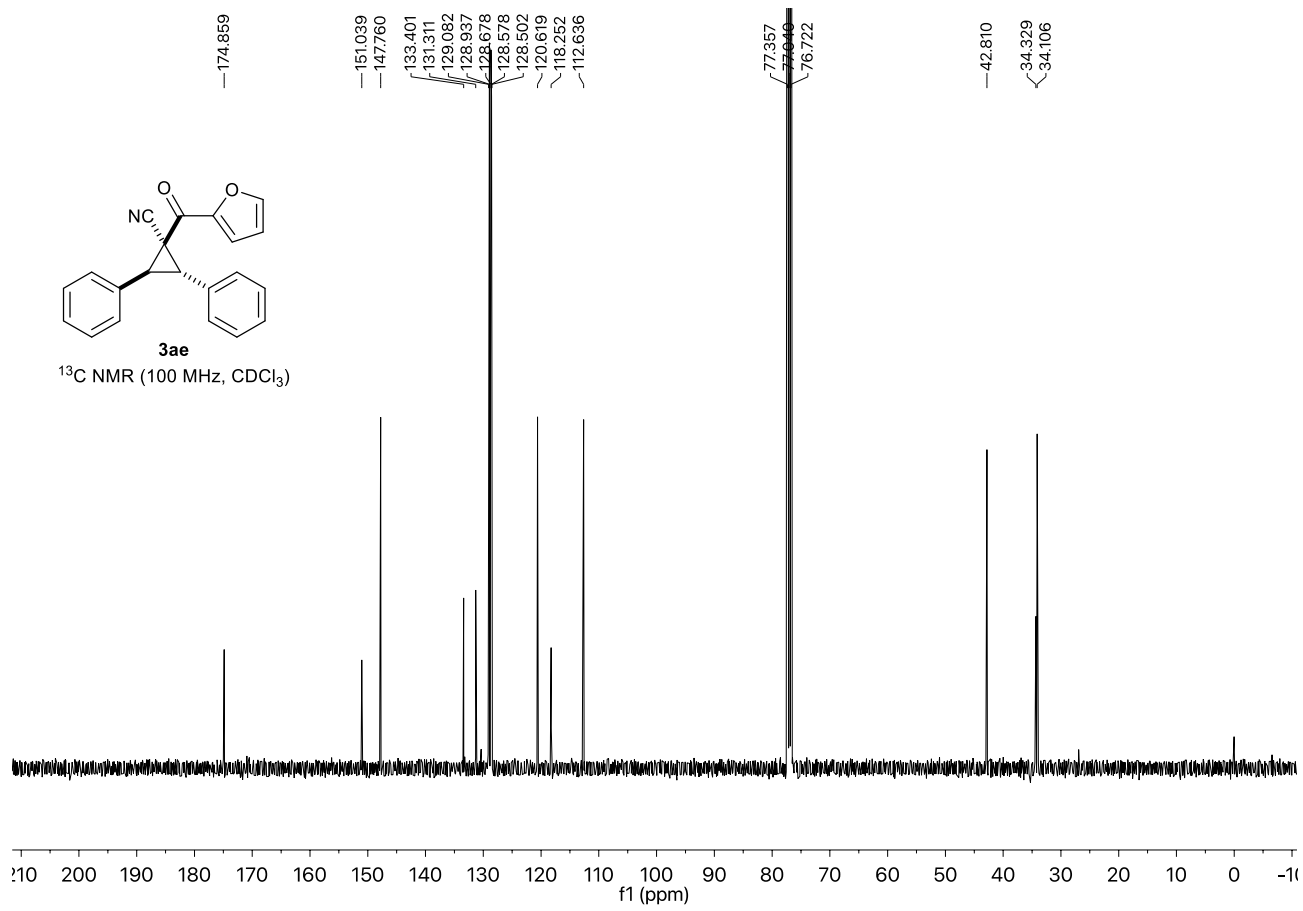

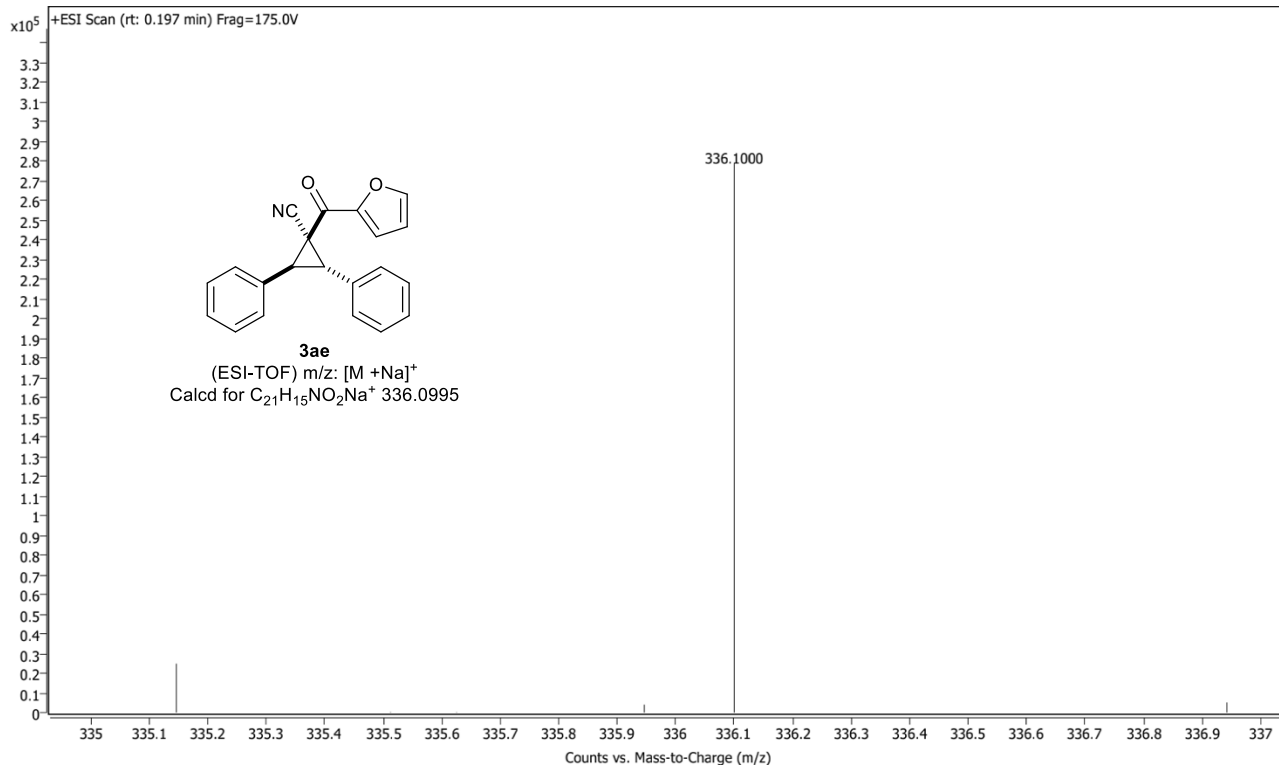

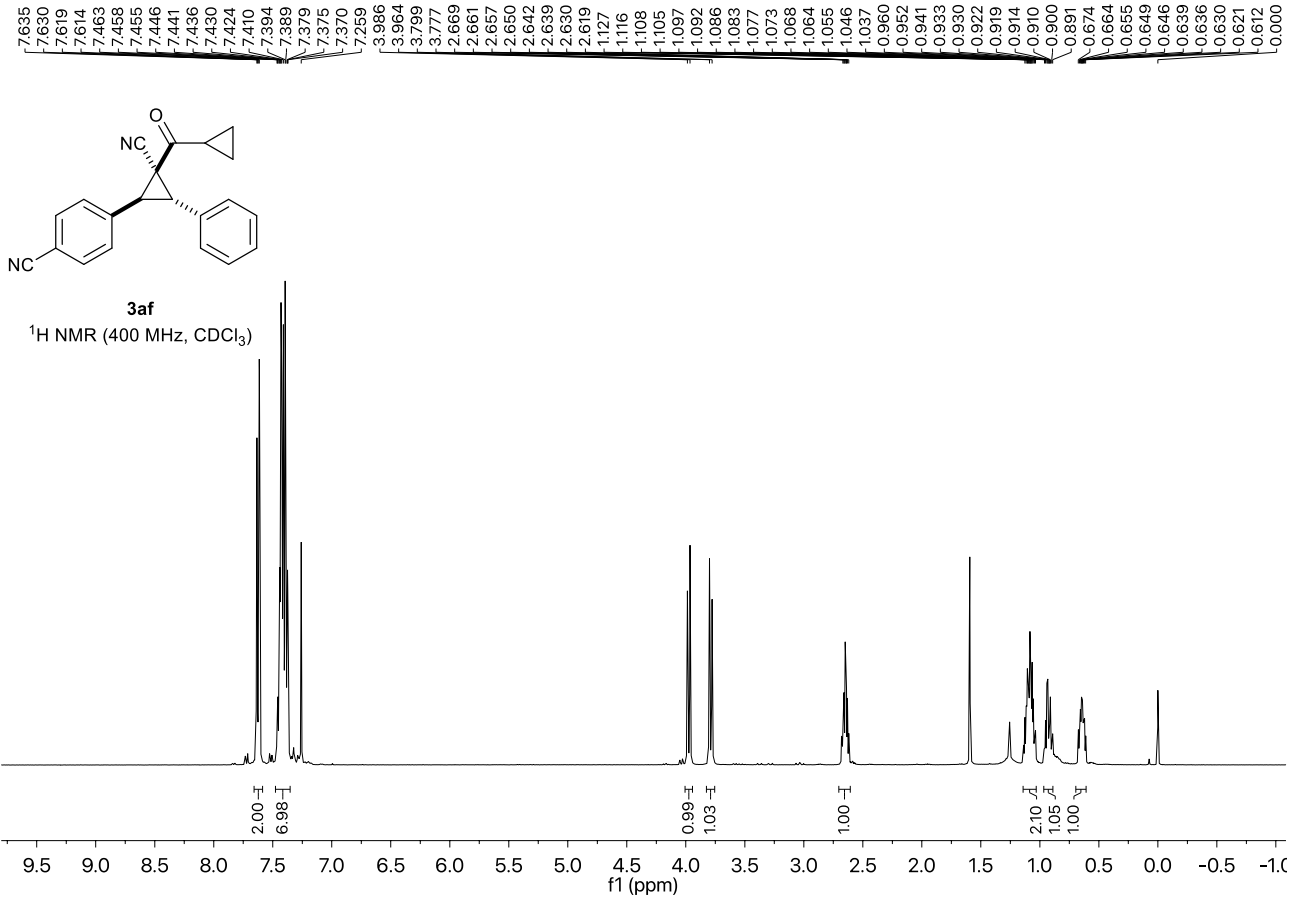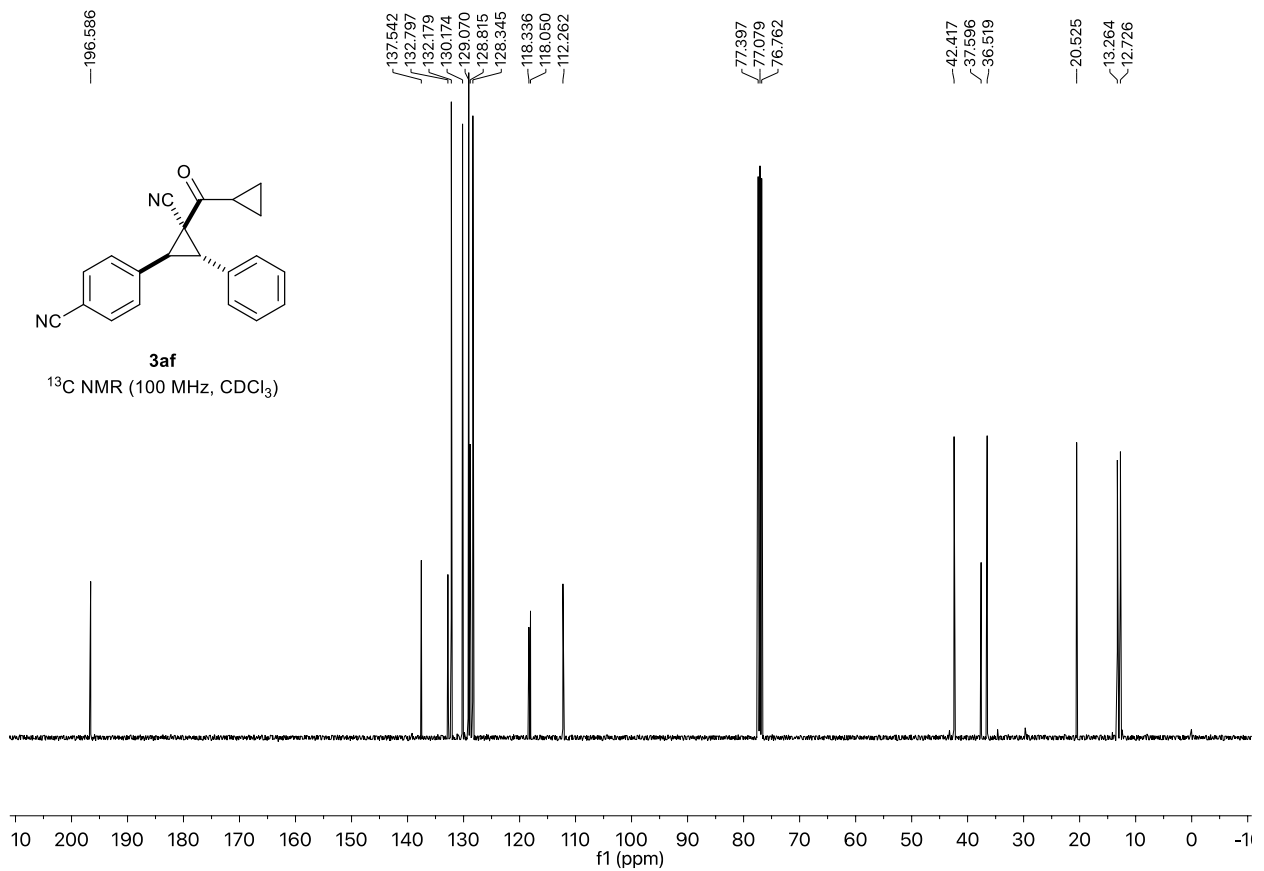

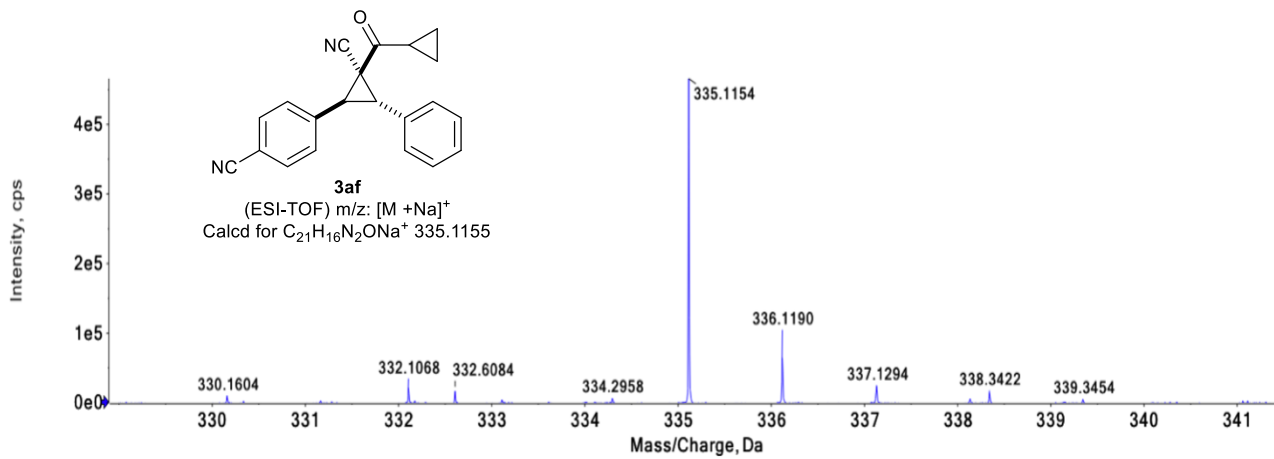

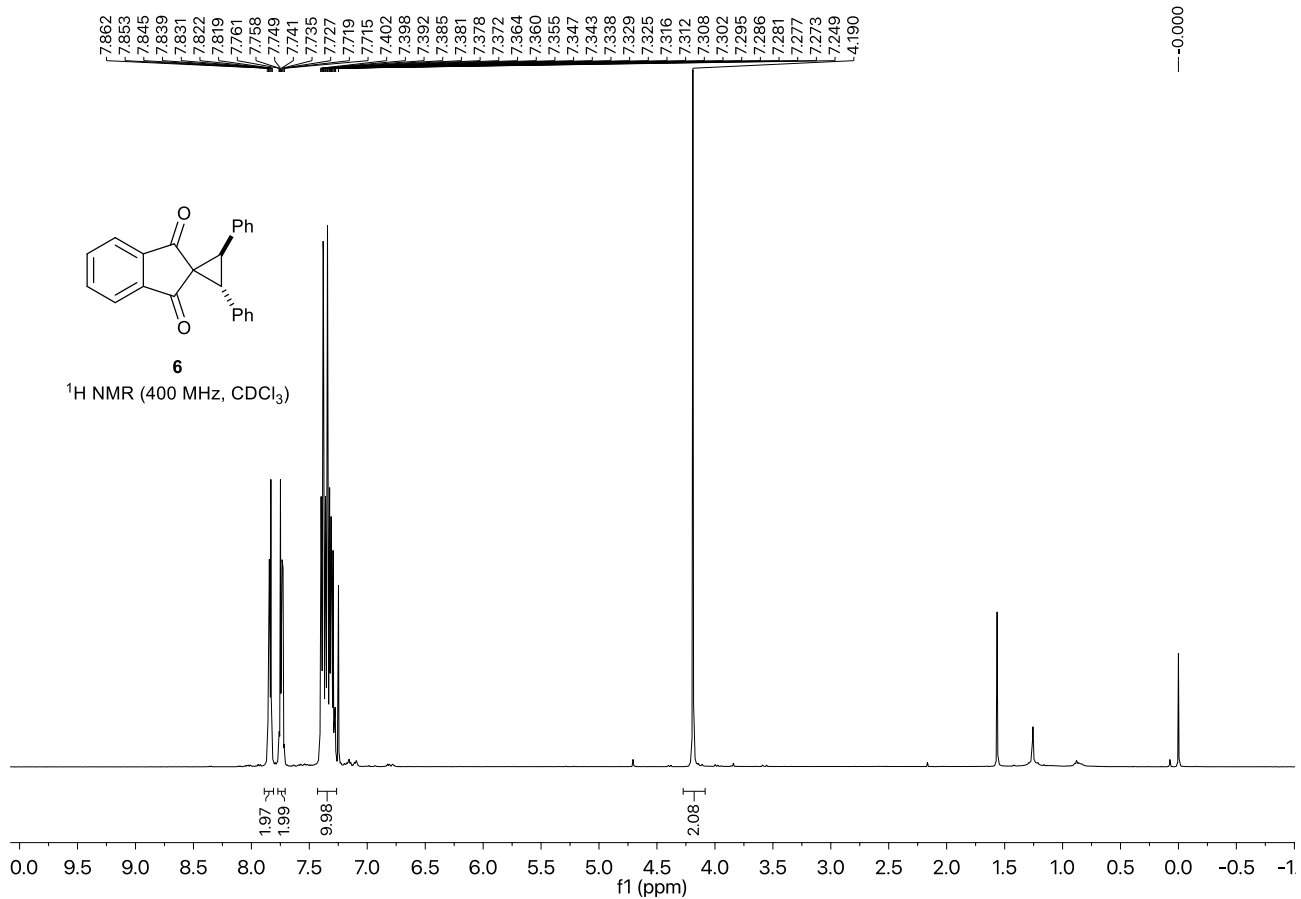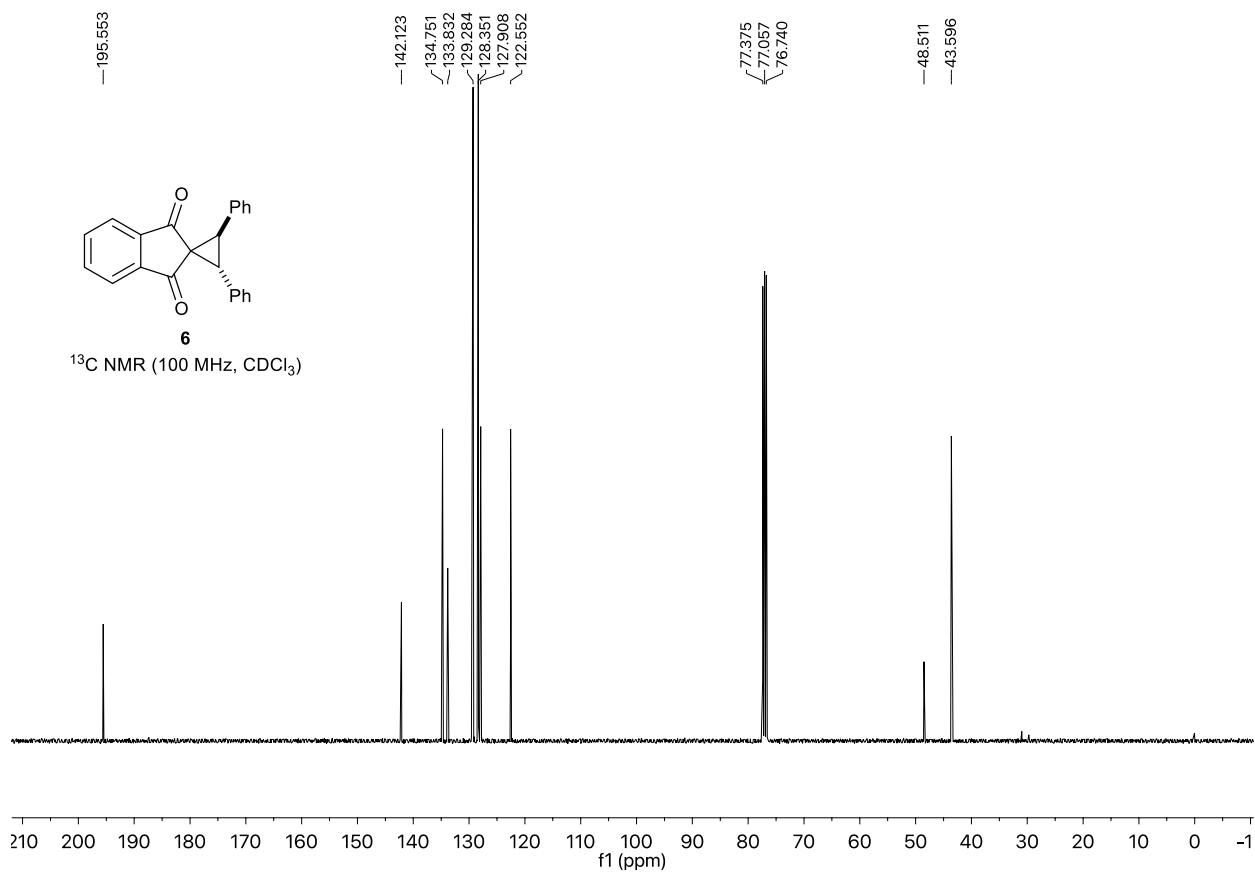

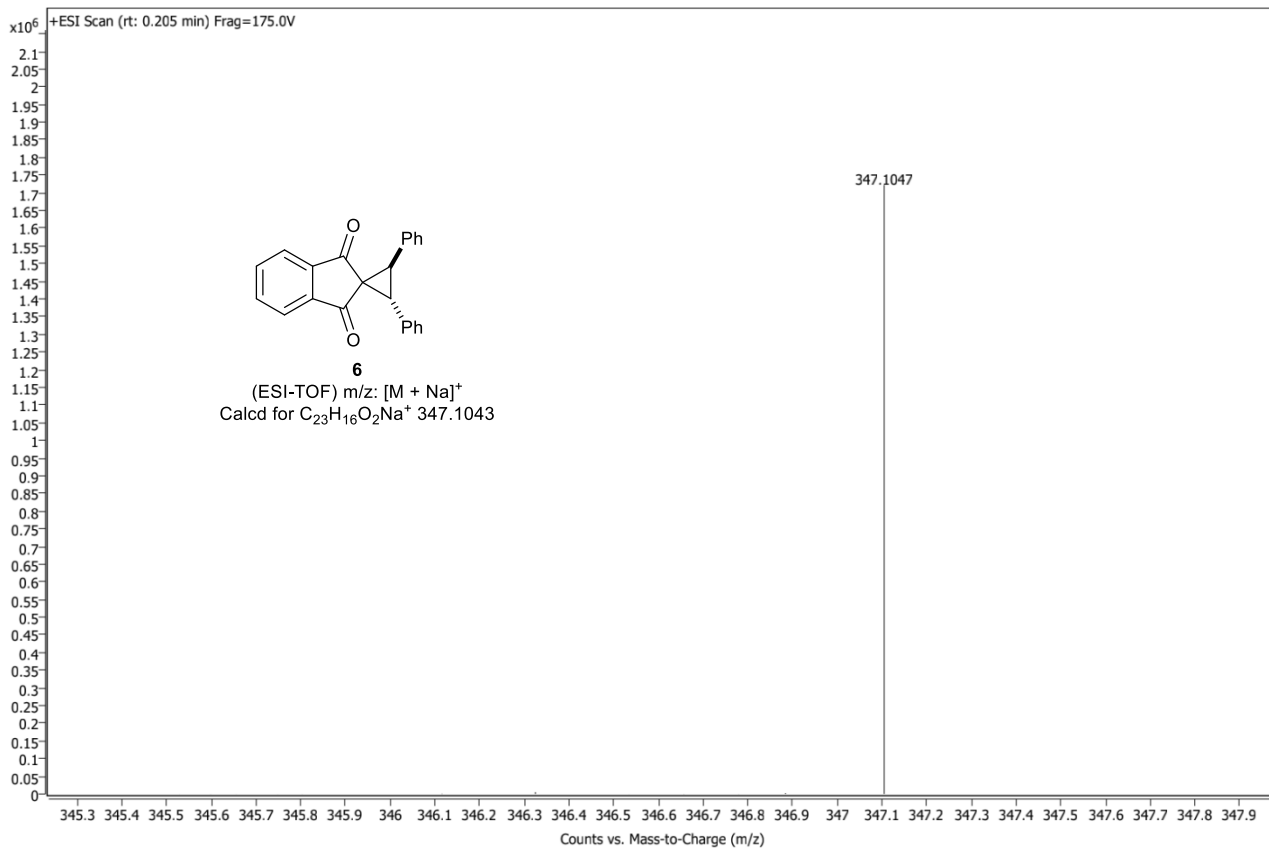

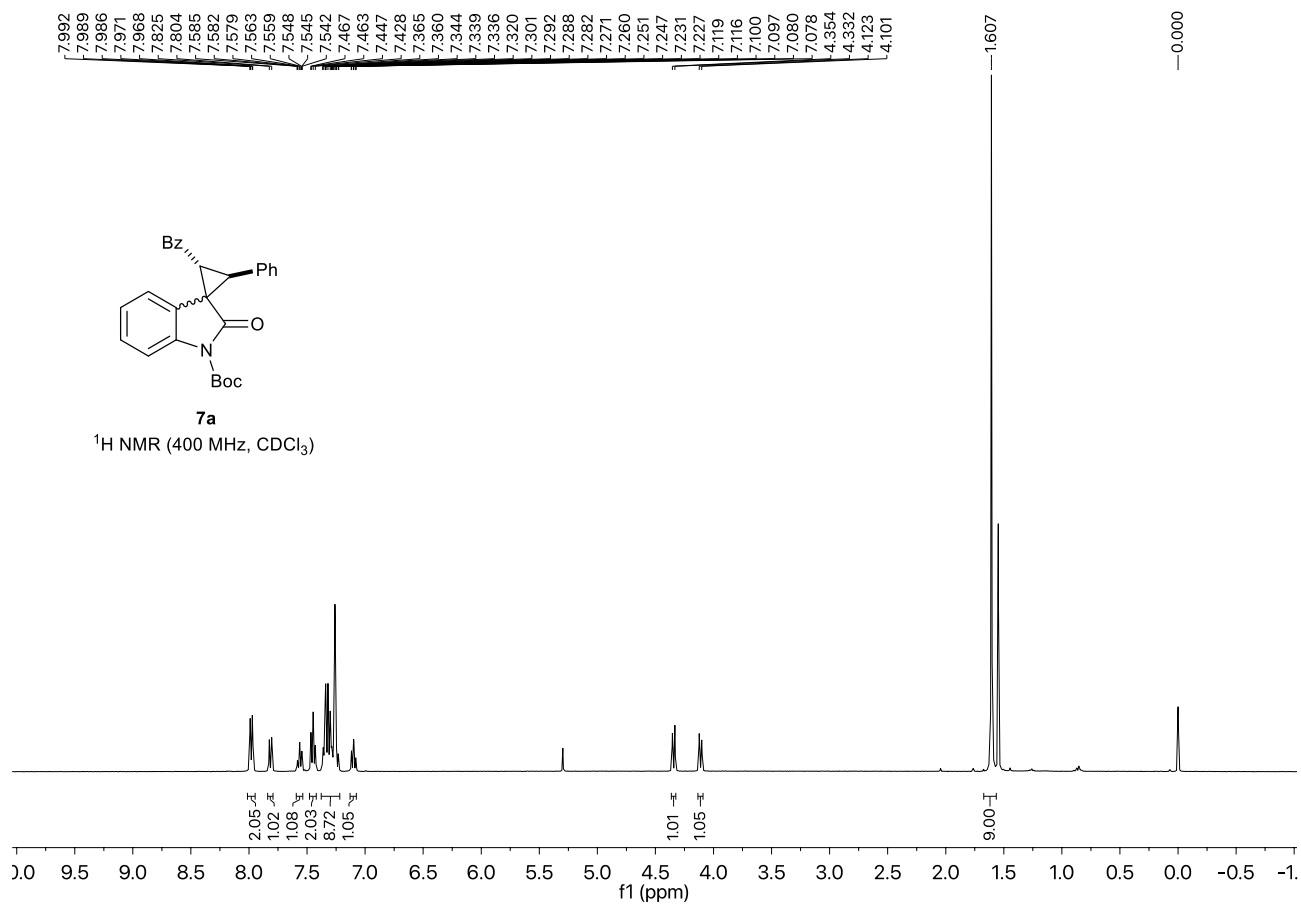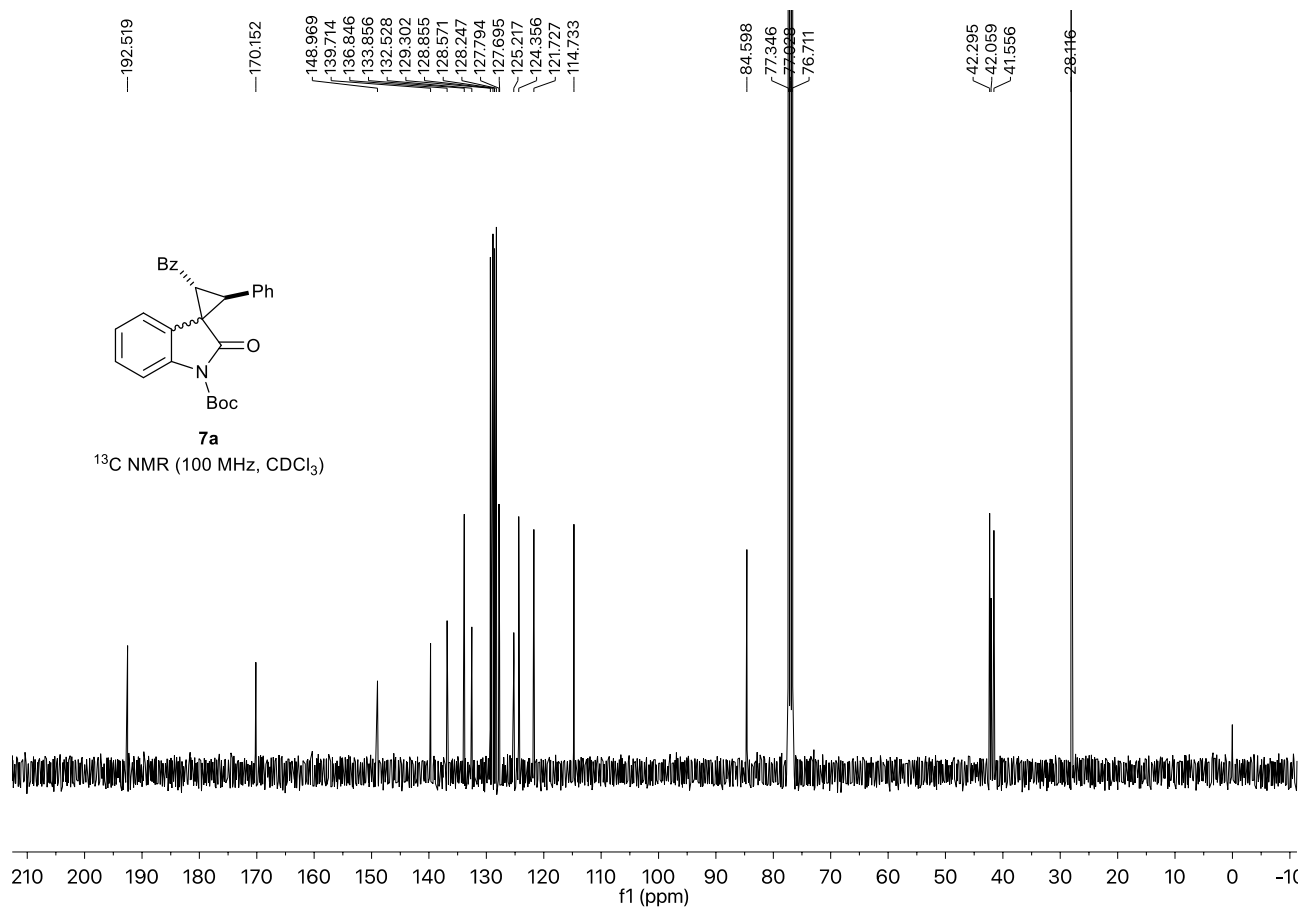



1: TOF MS ES+  
3.64e5

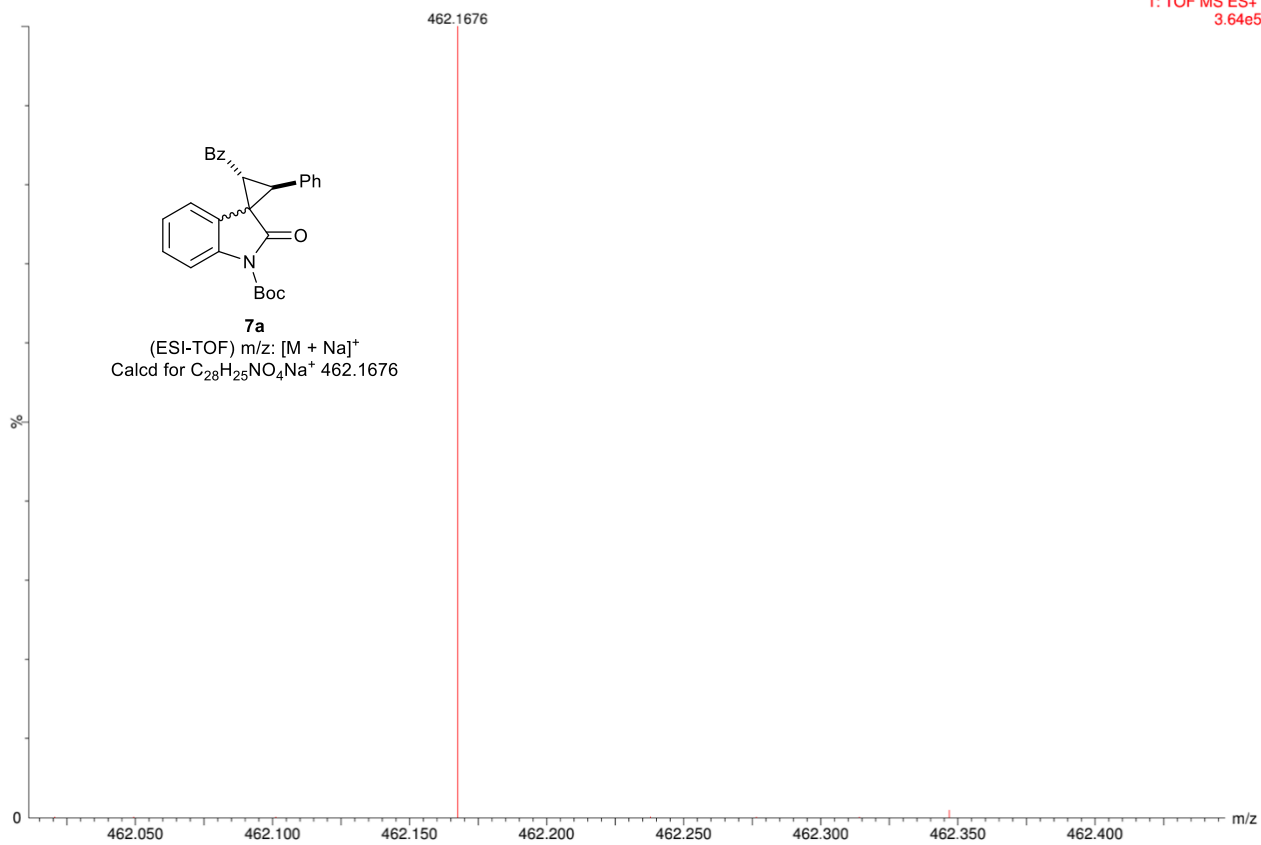

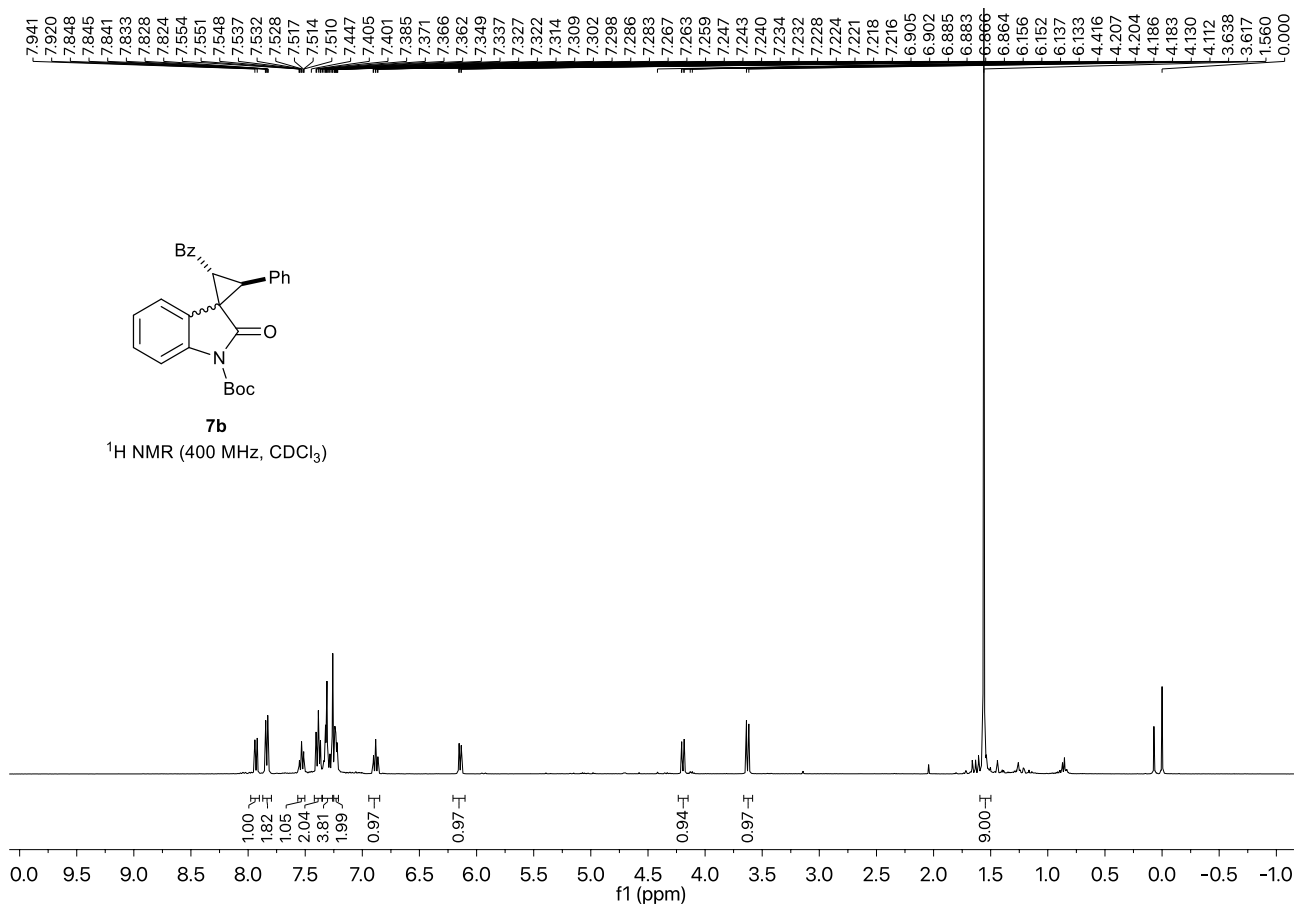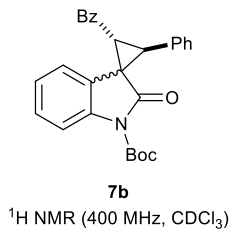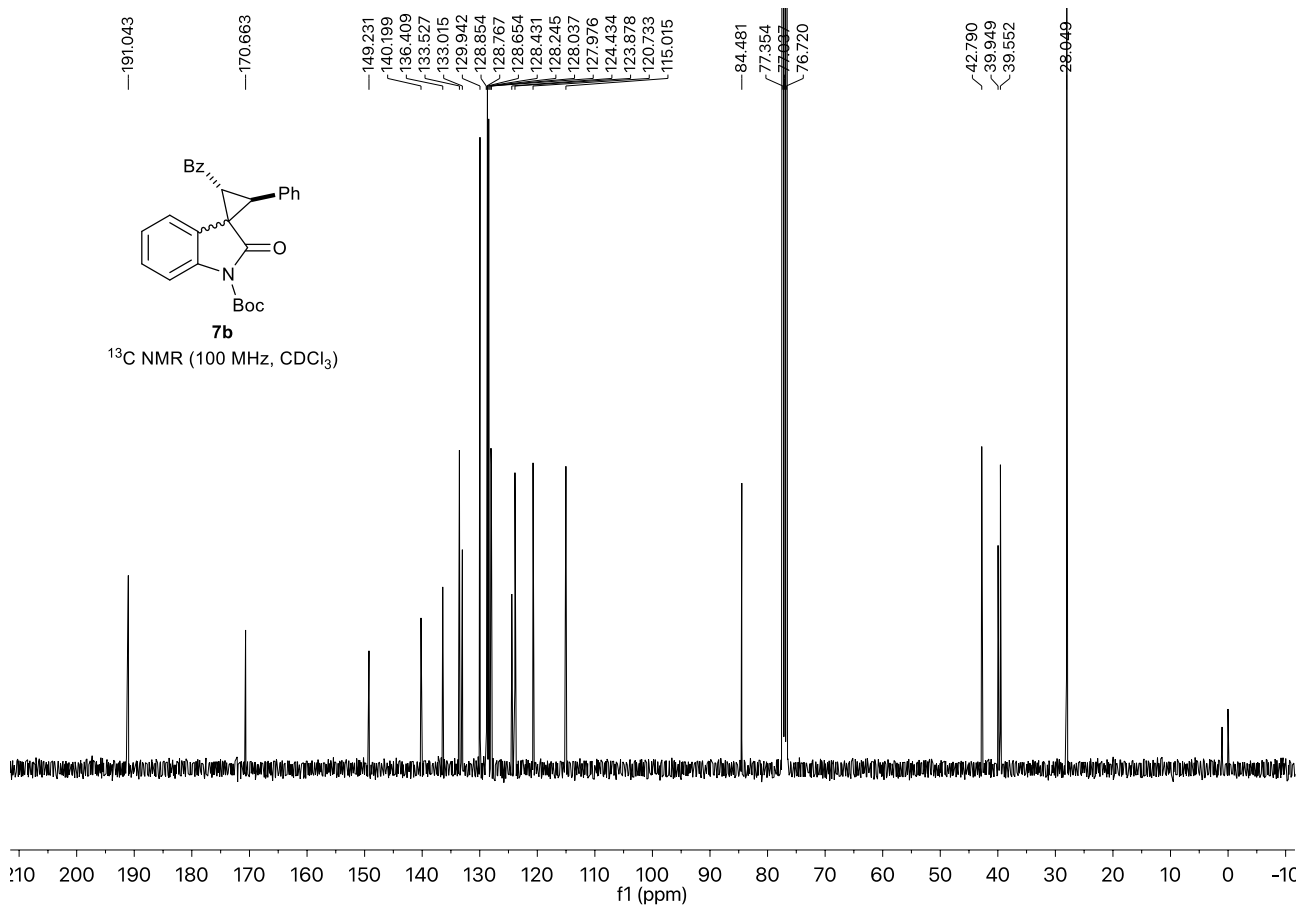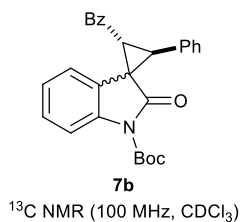

1: TOF MS ES+  
1.99e6

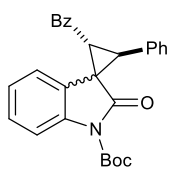

**7b**  
(ESI-TOF)  $m/z$ :  $[M + Na]^+$   
Calcd for  $C_{28}H_{25}NO_4Na^+$  462.1676

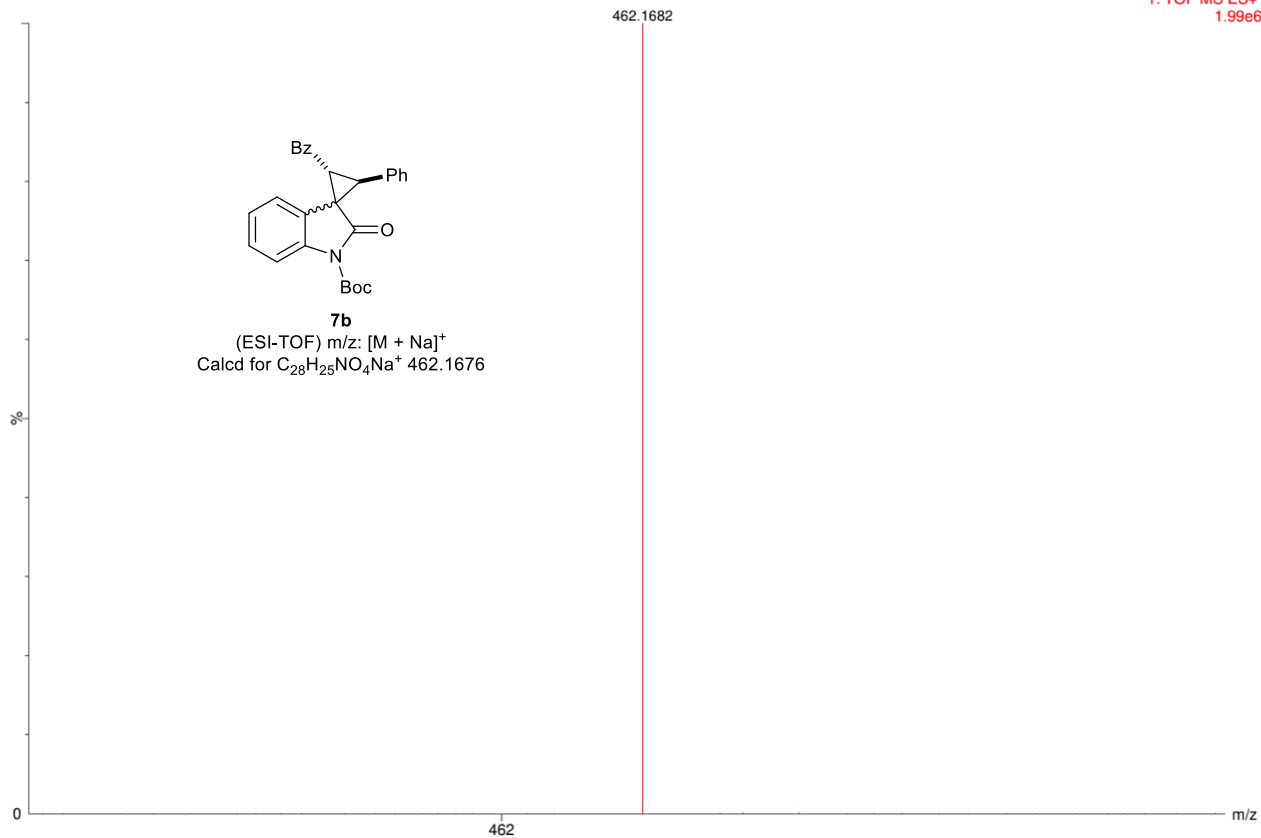

VWD1 A, Wavelength=254 nm

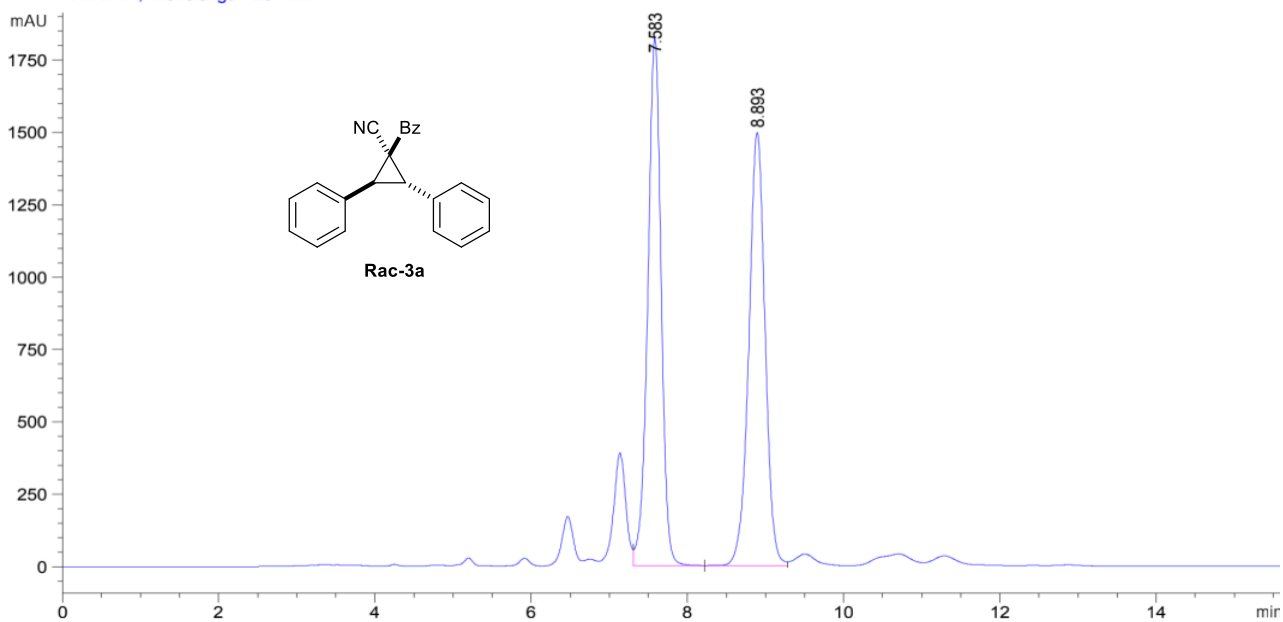

| Peak # | RetTime [min] | Type | Width [min] | Area mAU *s | Height [mAU] | Area %  |
|--------|---------------|------|-------------|-------------|--------------|---------|
| 1      | 7.583         | VB   | 0.1824      | 2.16473e4   | 1820.24963   | 50.0068 |
| 2      | 8.893         | BV   | 0.2240      | 2.16414e4   | 1496.57874   | 49.9932 |

VWD1 A, Wavelength=254 nm

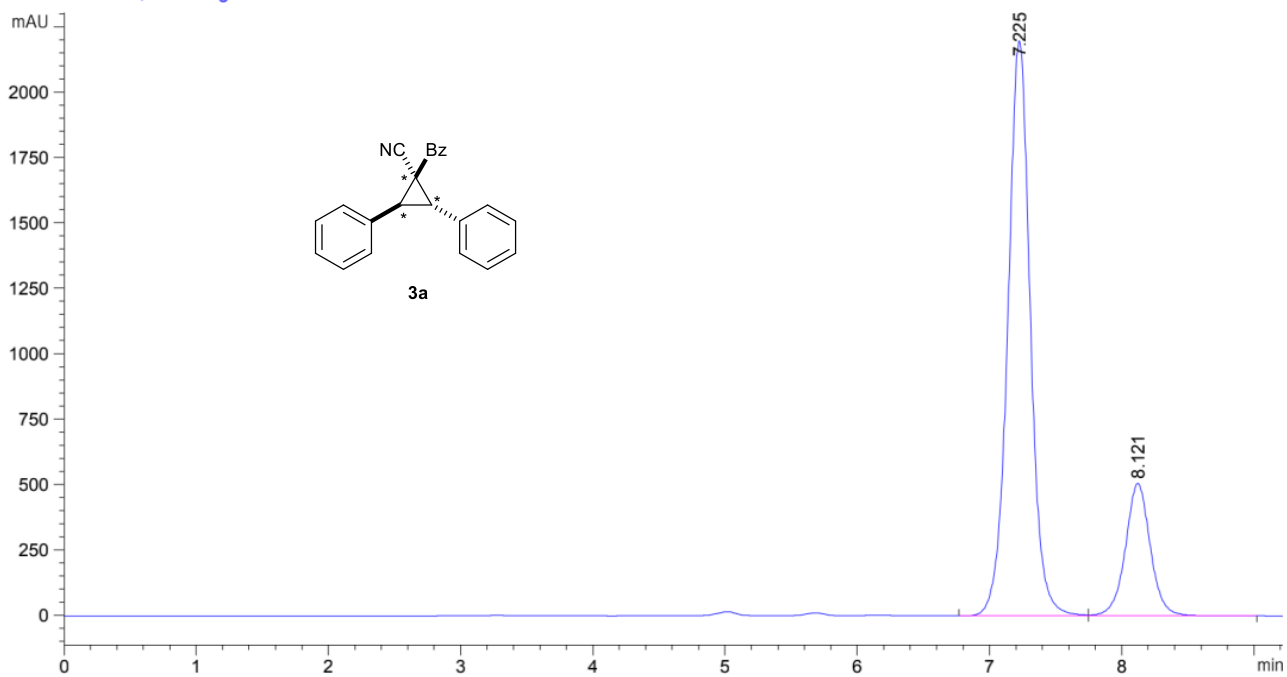

| Peak # | RetTime [min] | Type | Width [min] | Area mAU *s | Height [mAU] | Area %  |
|--------|---------------|------|-------------|-------------|--------------|---------|
| 1      | 7.225         | BV   | 0.1798      | 2.59170e4   | 2198.23340   | 79.5827 |
| 2      | 8.121         | VBA  | 0.1999      | 6649.12598  | 506.10809    | 20.4173 |

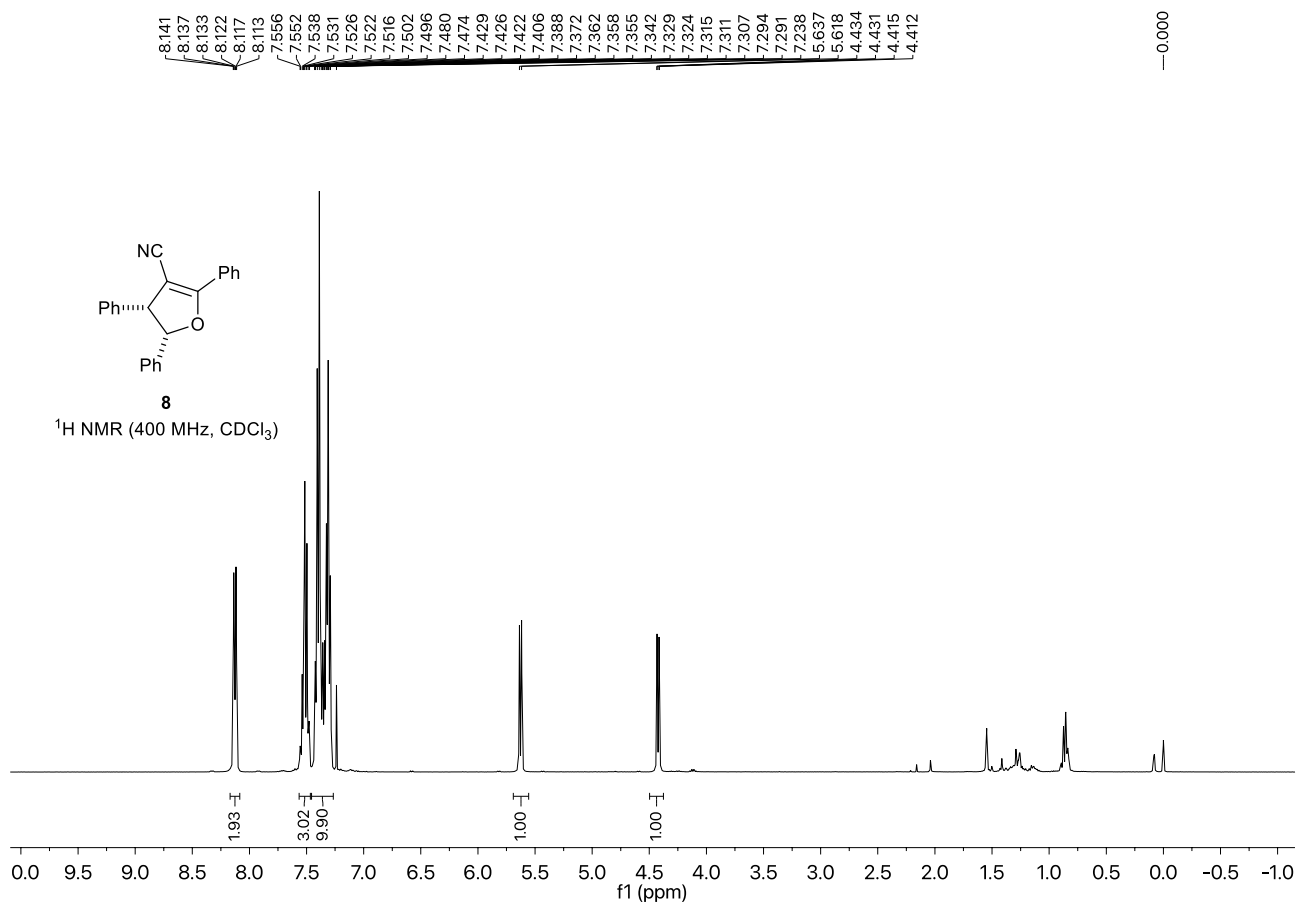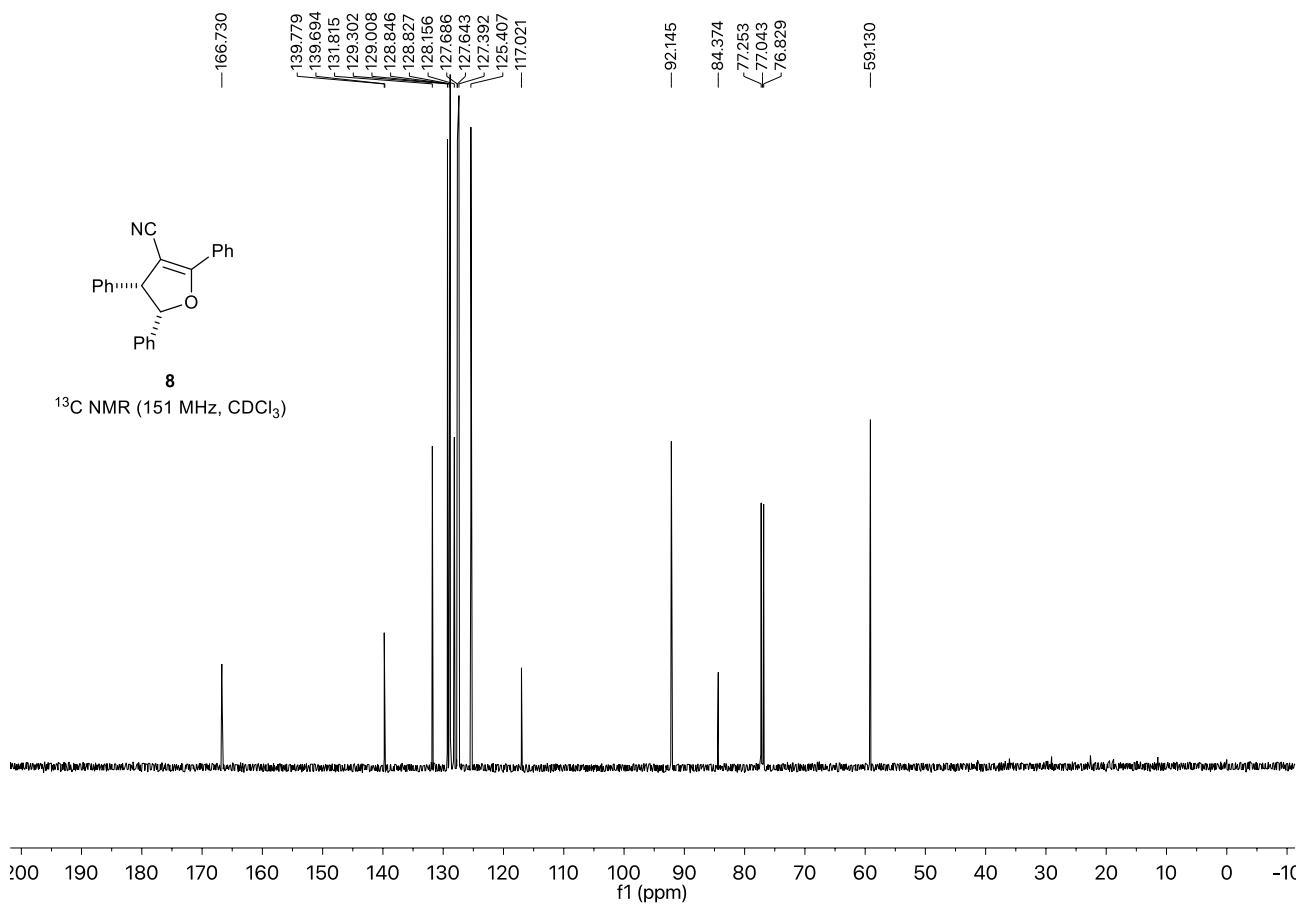

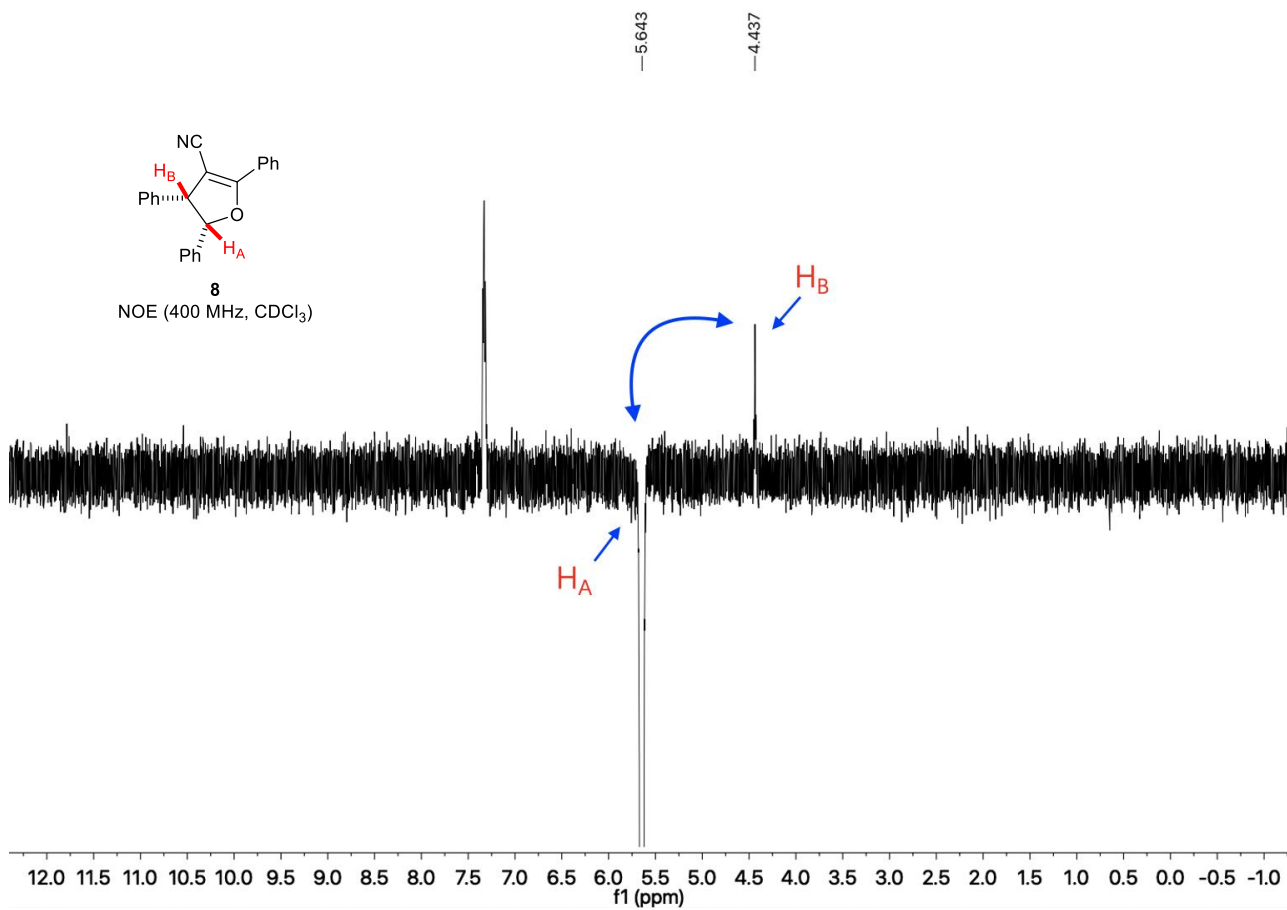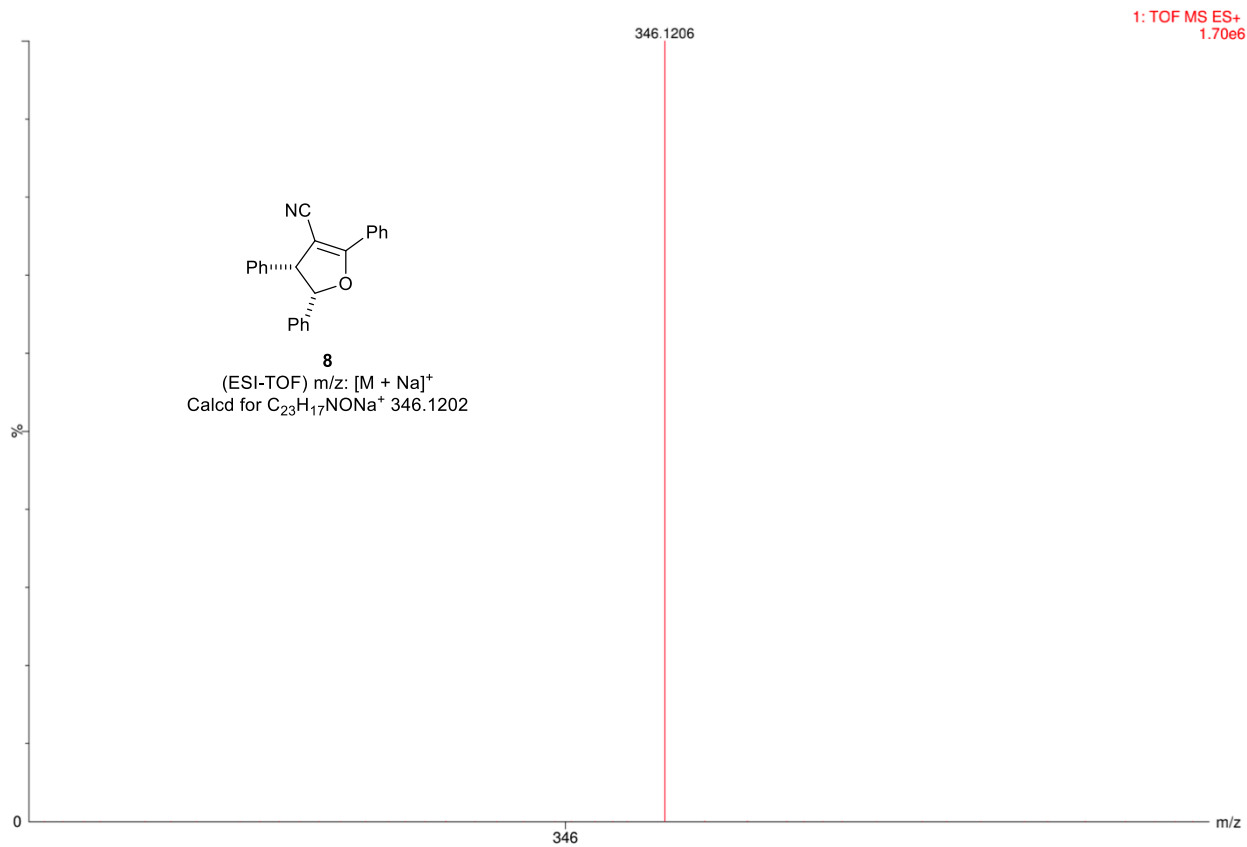

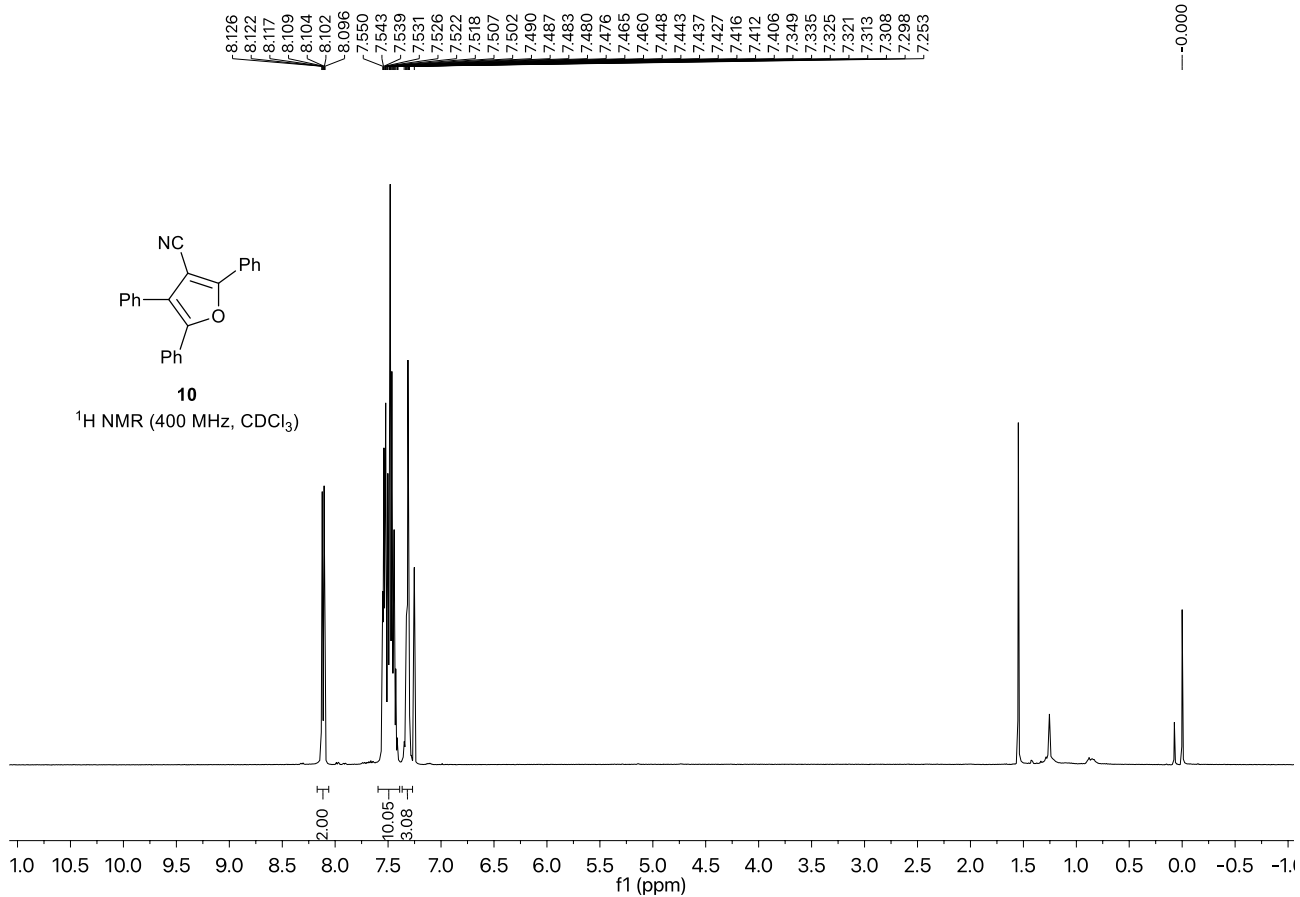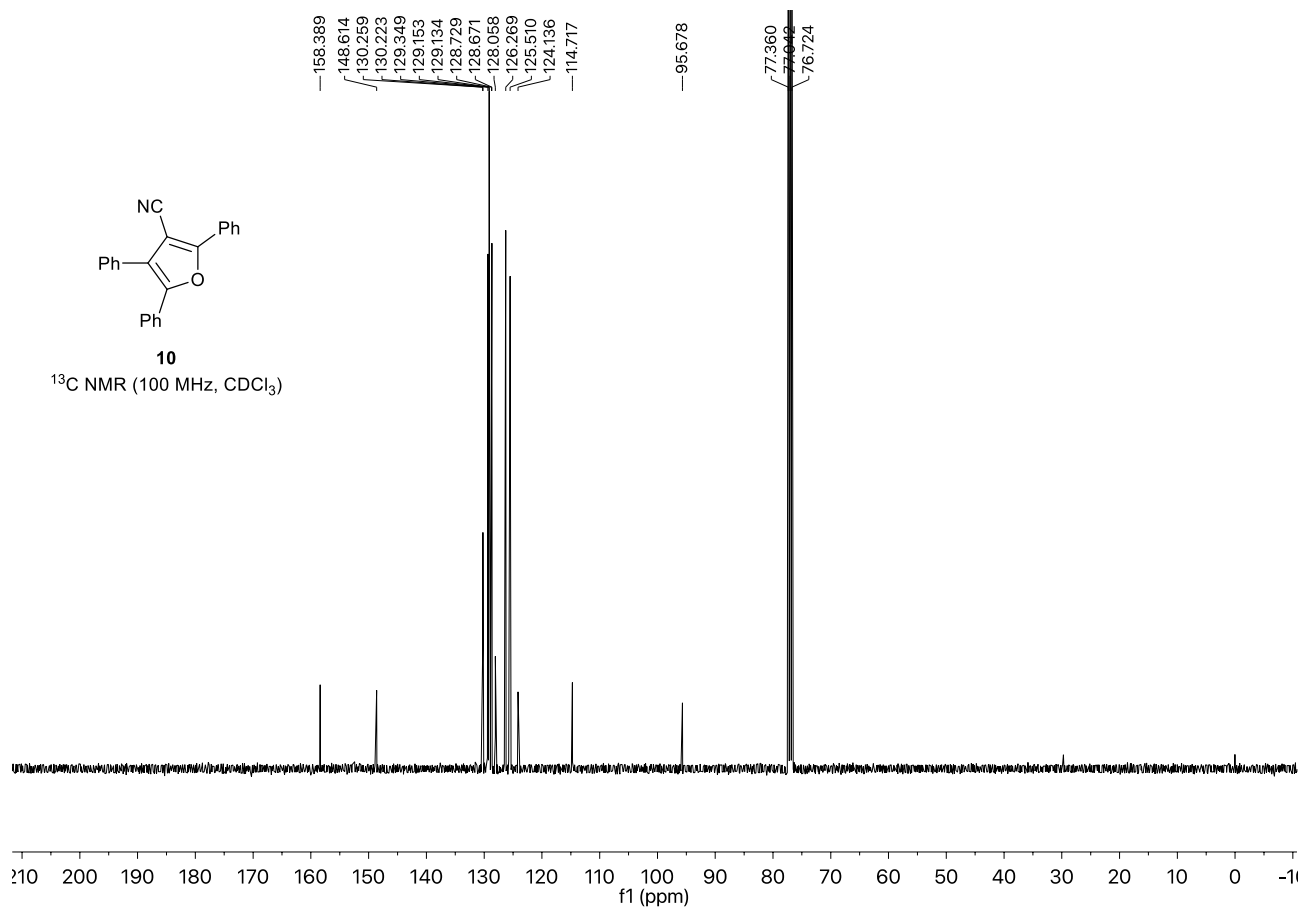

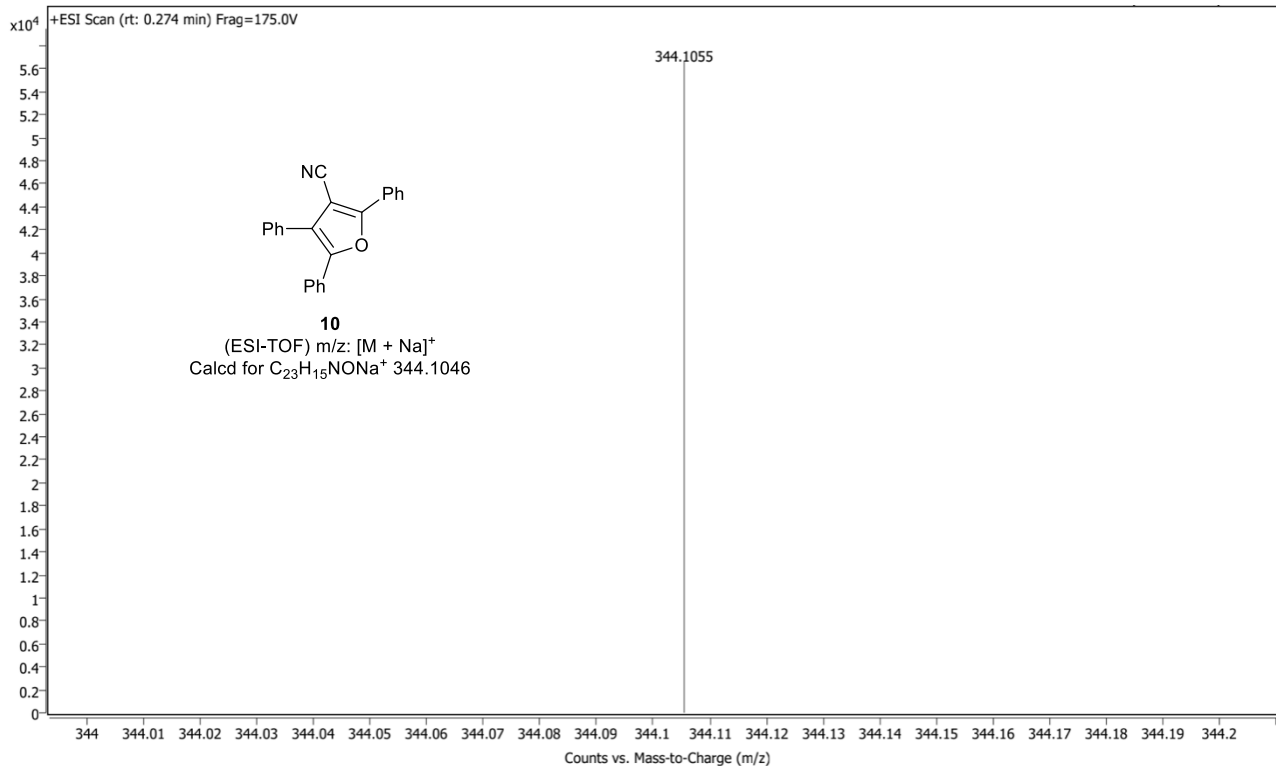



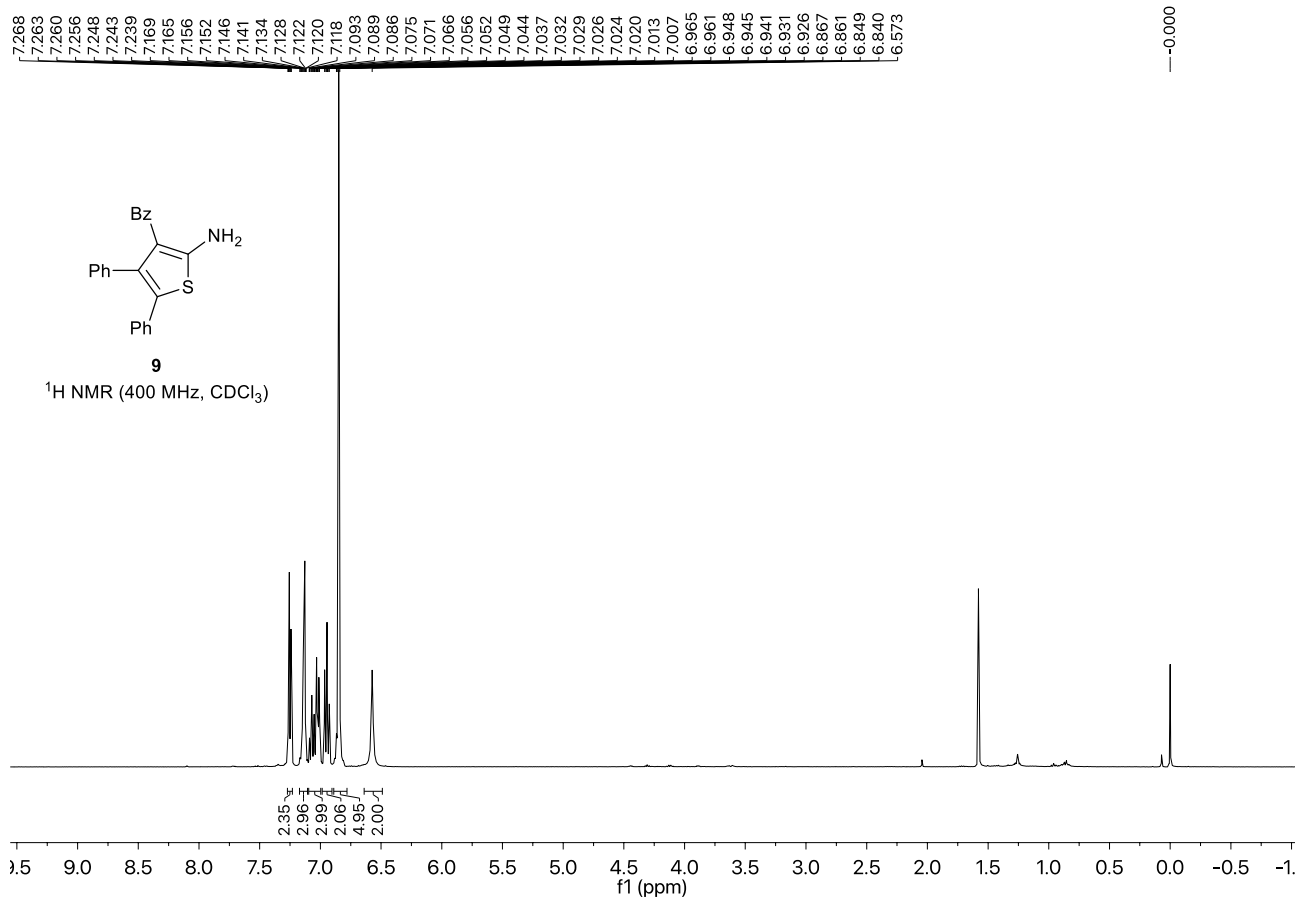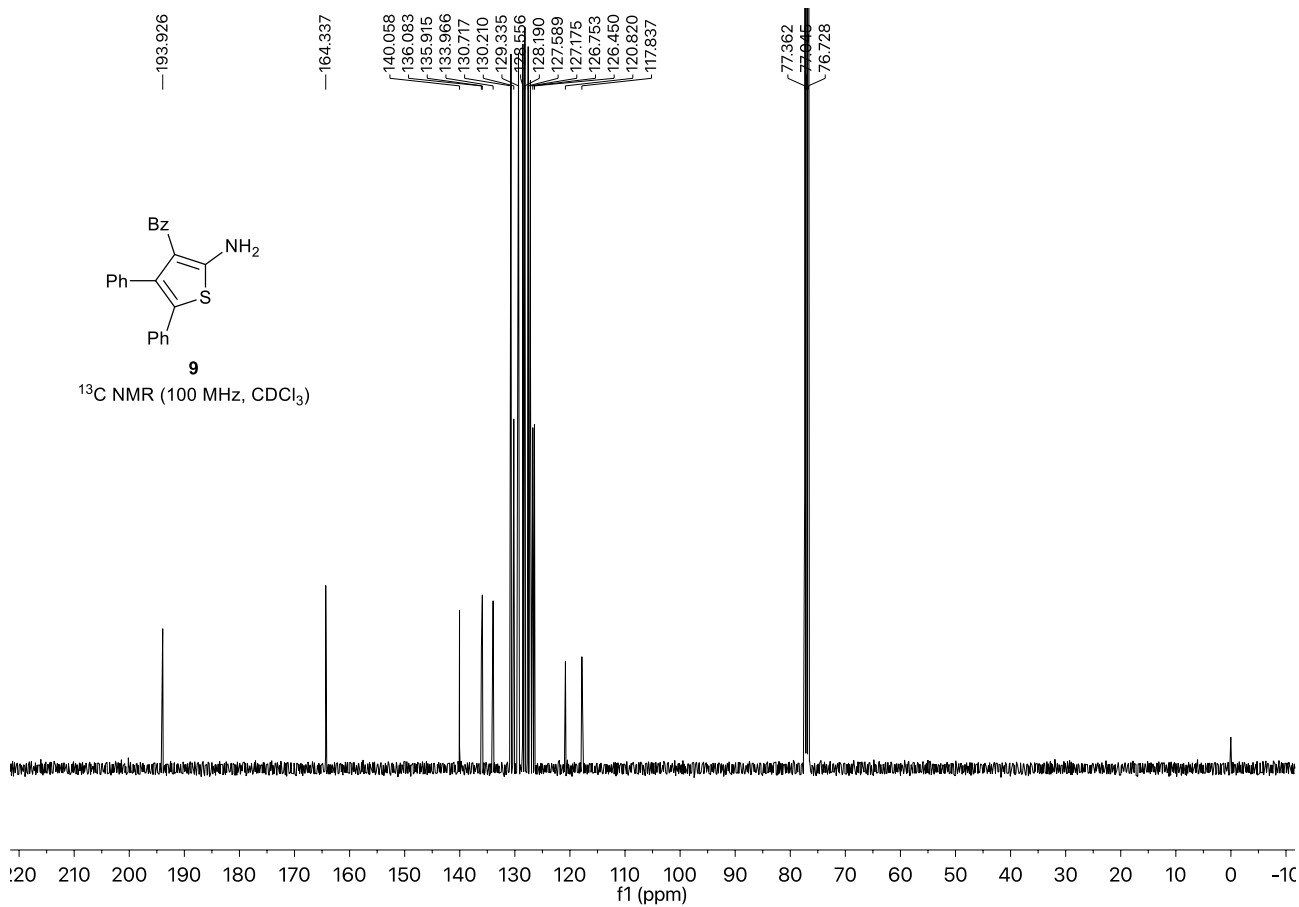

1: TOF MS ES+  
7.26e4

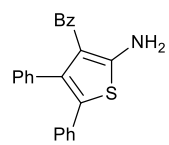

**9**  
(ESI-TOF) m/z: [M + Na]<sup>+</sup>  
Calcd for C<sub>23</sub>H<sub>17</sub>NOSNa<sup>+</sup> 378.0923

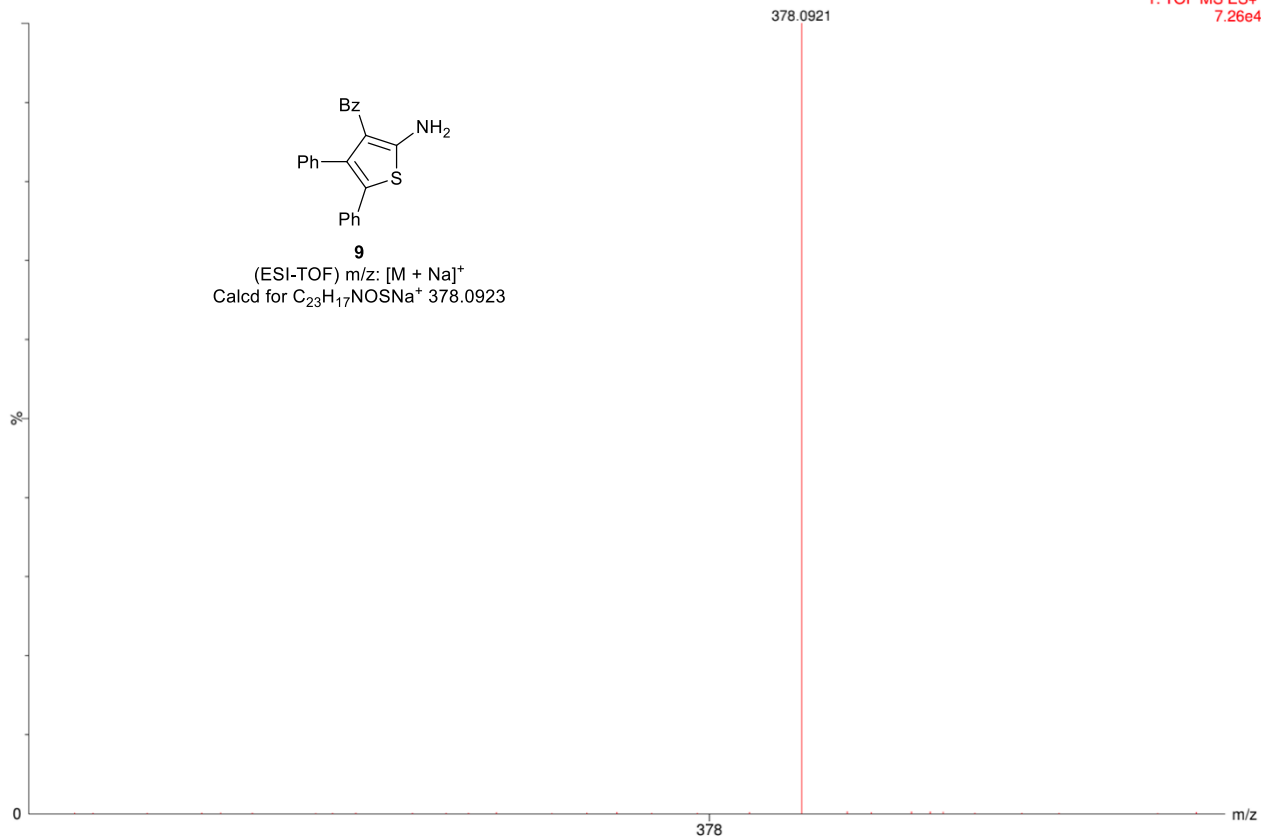

Supplement: d2nj03417d1.pdf [file d2nj03417d1.pdf]
